# Supplementary material
Source: publisher site journal article supplement (https://www.dovepress.com/get_supplementary_file.php?f=259895.xlsx)
Supplement: Supplementary file 1 [file get_supplementary_file.php]

## Sheet: SupplementaryData1
SupplementaryData1	For full lists of identified proteins
Accession	Protein Name	Gene Name	Description	Coverage	Unique Peptides	Peptides	PSMs	AAs	MW [kDa]	calc. pI	K-1/REF	K-1/REF Count	K-1/REF Variability [%]	K-2/REF	K-2/REF Count	K-2/REF Variability [%]	K-3/REF	K-3/REF Count	K-3/REF Variability [%]	Z-1/REF	Z-1/REF Count	Z-1/REF Variability [%]	Z-2/REF	Z-2/REF Count	Z-2/REF Variability [%]	Z-3/REF	Z-3/REF Count	Z-3/REF Variability [%]
Q15149	Plectin	PLEC	Plectin OS=Homo sapiens OX=9606 GN=PLEC PE=1 SV=3 - [PLEC_HUMAN]	64.39	287	293	1020	4684	531.466	5.96045	0.95504	1001	7.49753	0.94221	1002	6.66068	0.959139	1002	5.61282	1.10324	1002	8.5327	1.04388	1002	7.38699	1.0024	1002	5.48076
P05783	Keratin, type I cytoskeletal 18	KRT18	Keratin, type I cytoskeletal 18 OS=Homo sapiens OX=9606 GN=KRT18 PE=1 SV=2 - [K1C18_HUMAN]	79.53	40	43	707	430	48.0285	5.45264	0.988286	662	10.2301	0.950297	662	10.4839	0.974831	662	7.6022	1.02832	634	10.2997	1.01426	662	12.1461	1.01546	662	10.0517
P60709	Actin, cytoplasmic 1	ACTB	Actin, cytoplasmic 1 OS=Homo sapiens OX=9606 GN=ACTB PE=1 SV=1 - [ACTB_HUMAN]	65.6	1	19	619	375	41.7097	5.47803	1.03413	17	4.85337	1.09085	17	7.09978	1.11909	17	9.47606	0.893487	17	4.37318	0.946384	17	6.2391	0.969694	17	4.7956
P63261	Actin, cytoplasmic 2	ACTG1	Actin, cytoplasmic 2 OS=Homo sapiens OX=9606 GN=ACTG1 PE=1 SV=1 - [ACTG_HUMAN]	65.6	1	19	614	375	41.7658	5.47803	1.00696	12	7.34319	1.09591	12	7.42976	1.04625	12	9.32944	0.94043	12	6.97487	0.971131	12	18.8903	0.979843	12	5.17441
Q09666	Neuroblast differentiation-associated protein AHNAK	AHNAK	Neuroblast differentiation-associated protein AHNAK OS=Homo sapiens OX=9606 GN=AHNAK PE=1 SV=2 - [AHNK_HUMAN]	71.41	251	256	883	5890	628.699	6.15088	0.901347	812	8.28351	0.964395	812	5.288	0.983272	812	5.29382	1.04116	812	6.48993	1.07771	812	6.24721	1.02431	812	4.7022
P05787	Keratin, type II cytoskeletal 8	KRT8	Keratin, type II cytoskeletal 8 OS=Homo sapiens OX=9606 GN=KRT8 PE=1 SV=7 - [K2C8_HUMAN]	75.98	32	45	841	483	53.6711	5.59229	1.01203	632	10.6399	0.954636	632	8.73114	0.99392	633	5.71874	1.04199	632	13.7865	1.009	632	9.80076	0.982699	632	10.7547
P21333	Filamin-A	FLNA	Filamin-A OS=Homo sapiens OX=9606 GN=FLNA PE=1 SV=4 - [FLNA_HUMAN]	66.53	120	137	717	2647	280.564	6.06201	0.938231	647	7.65219	1.01085	647	5.32372	1.04056	647	6.11711	0.923688	647	8.47475	1.05075	647	7.48194	1.03091	647	5.75943
P35579	Myosin-9	MYH9	Myosin-9 OS=Homo sapiens OX=9606 GN=MYH9 PE=1 SV=4 - [MYH9_HUMAN]	60.05	103	126	611	1960	226.392	5.60498	0.965825	496	7.28552	0.989895	496	6.21202	1.02036	496	5.97254	0.938669	496	7.07275	1.05058	496	7.64355	1.03674	496	5.73503
P10809	60 kDa heat shock protein, mitochondrial	HSPD1	60 kDa heat shock protein, mitochondrial OS=Homo sapiens OX=9606 GN=HSPD1 PE=1 SV=2 - [CH60_HUMAN]	75.39	35	35	311	573	61.0164	5.87158	0.936752	310	8.70305	0.890476	310	10.9915	0.890263	310	7.14002	1.18571	310	11.9261	1.04357	310	7.43608	1.01629	310	6.1037
O75369	Filamin-B	FLNB	Filamin-B OS=Homo sapiens OX=9606 GN=FLNB PE=1 SV=2 - [FLNB_HUMAN]	63.76	115	131	517	2602	277.99	5.73193	0.864014	448	10.1855	0.954787	448	5.85608	0.983095	448	6.01059	0.97754	448	7.39846	1.09897	448	8.6412	1.08154	448	6.03355
O43707	Alpha-actinin-4	ACTN4	Alpha-actinin-4 OS=Homo sapiens OX=9606 GN=ACTN4 PE=1 SV=2 - [ACTN4_HUMAN]	73.77	45	66	431	911	104.788	5.43994	0.982629	291	7.88685	1.01645	291	5.07768	1.04365	291	4.83915	0.927657	291	6.4824	1.04158	291	8.53833	1.01291	291	5.56246
P14618	Pyruvate kinase PKM	PKM	Pyruvate kinase PKM OS=Homo sapiens OX=9606 GN=PKM PE=1 SV=4 - [KPYM_HUMAN]	79.66	37	39	419	531	57.9	7.84033	1.02063	388	13.1462	1.03242	388	6.33576	1.07295	388	7.19901	0.874479	388	10.4994	0.980289	388	7.97015	1.01379	388	6.78382
Q13813	Spectrin alpha chain, non-erythrocytic 1	SPTAN1	Spectrin alpha chain, non-erythrocytic 1 OS=Homo sapiens OX=9606 GN=SPTAN1 PE=1 SV=3 - [SPTN1_HUMAN]	67.64	165	165	500	2472	284.364	5.35107	0.949673	494	7.42473	0.965547	494	4.87922	0.987207	494	4.6643	1.03965	494	6.39103	1.05745	494	6.84657	1.01239	494	5.41697
P00352	Retinal dehydrogenase 1	ALDH1A1	Retinal dehydrogenase 1 OS=Homo sapiens OX=9606 GN=ALDH1A1 PE=1 SV=2 - [AL1A1_HUMAN]	74.65	29	32	410	501	54.827	6.72705	1.03474	362	8.85586	1.11456	362	7.30354	1.17404	362	11.582	0.759419	362	18.0469	0.964324	362	7.58057	0.988677	362	6.44797
P08238	Heat shock protein HSP 90-beta	HSP90AB1	Heat shock protein HSP 90-beta OS=Homo sapiens OX=9606 GN=HSP90AB1 PE=1 SV=4 - [HS90B_HUMAN]	63.26	27	47	379	724	83.2121	5.03369	0.963394	169	12.4606	0.986002	169	5.58031	1.02566	169	7.80425	0.913259	169	11.9014	1.03656	169	12.0864	1.04518	169	7.64321
P07355	Annexin A2	ANXA2	Annexin A2 OS=Homo sapiens OX=9606 GN=ANXA2 PE=1 SV=2 - [ANXA2_HUMAN]	73.16	28	28	393	339	38.5798	7.75244	0.989374	392	9.25863	1.00593	392	5.15121	1.01125	392	5.69177	0.981528	392	6.99038	1.02412	392	7.12173	0.990349	392	6.75169
P12814	Alpha-actinin-1	ACTN1	Alpha-actinin-1 OS=Homo sapiens OX=9606 GN=ACTN1 PE=1 SV=2 - [ACTN1_HUMAN]	67.49	37	58	284	892	102.993	5.41455	0.929051	156	7.99403	1.02188	156	5.383	1.03762	156	5.78872	0.880716	156	8.39089	1.0698	156	8.49059	1.05977	156	5.83418
Q14204	Cytoplasmic dynein 1 heavy chain 1	DYNC1H1	Cytoplasmic dynein 1 heavy chain 1 OS=Homo sapiens OX=9606 GN=DYNC1H1 PE=1 SV=5 - [DYHC1_HUMAN]	39.82	175	177	399	4646	532.072	6.40479	0.911425	396	9.37881	0.929451	396	6.67221	0.962042	396	5.50622	1.03944	396	6.90118	1.07129	396	8.12307	1.06503	396	6.29639
P07900	Heat shock protein HSP 90-alpha	HSP90AA1	Heat shock protein HSP 90-alpha OS=Homo sapiens OX=9606 GN=HSP90AA1 PE=1 SV=5 - [HS90A_HUMAN]	65.03	28	50	370	732	84.6067	5.021	0.98452	171	11.865	1.01666	171	5.53401	1.03679	171	6.7834	0.923094	171	8.56943	1.00672	171	9.26936	1.02396	171	7.08715
Q01082	Spectrin beta chain, non-erythrocytic 1	SPTBN1	Spectrin beta chain, non-erythrocytic 1 OS=Homo sapiens OX=9606 GN=SPTBN1 PE=1 SV=2 - [SPTB2_HUMAN]	61.29	118	131	406	2364	274.439	5.56689	0.910663	373	7.90227	0.944987	373	6.11278	0.957448	373	5.64945	1.0523	373	6.28358	1.0738	373	8.47885	1.04502	373	5.84901
Q00610	Clathrin heavy chain 1	CLTC	Clathrin heavy chain 1 OS=Homo sapiens OX=9606 GN=CLTC PE=1 SV=5 - [CLH1_HUMAN]	51.7	72	72	276	1675	191.493	5.69385	0.922913	276	10.4974	0.936354	276	6.34514	0.978193	276	5.33651	1.05028	276	7.1939	1.05397	276	8.19141	1.03543	276	7.3041
P78527	DNA-dependent protein kinase catalytic subunit	PRKDC	DNA-dependent protein kinase catalytic subunit OS=Homo sapiens OX=9606 GN=PRKDC PE=1 SV=3 - [PRKDC_HUMAN]	38.37	150	151	352	4128	468.788	7.12256	1.03215	348	10.2048	1.0421	348	5.4163	1.05743	348	5.43457	0.990422	349	6.26591	0.954348	348	8.44119	0.973644	348	8.285
P08670	Vimentin	VIM	Vimentin OS=Homo sapiens OX=9606 GN=VIM PE=1 SV=4 - [VIME_HUMAN]	79.4	35	39	331	466	53.6191	5.12256	0.943196	254	7.18805	0.918393	254	10.0331	0.921628	254	7.29319	1.13351	254	9.89547	1.04771	254	7.46254	1.02209	254	5.09703
P08729	Keratin, type II cytoskeletal 7	KRT7	Keratin, type II cytoskeletal 7 OS=Homo sapiens OX=9606 GN=KRT7 PE=1 SV=5 - [K2C7_HUMAN]	68.02	30	40	417	469	51.3543	5.47803	1.00774	268	7.76151	0.957617	268	5.63028	0.980965	268	6.54158	1.09849	269	8.51549	1.03255	268	7.70407	0.950659	268	6.81401
P06733	Alpha-enolase	ENO1	Alpha-enolase OS=Homo sapiens OX=9606 GN=ENO1 PE=1 SV=2 - [ENOA_HUMAN]	73.73	21	26	315	434	47.1393	7.38623	1.04008	251	9.42807	1.0789	251	6.25701	1.12429	251	8.04962	0.82478	251	13.8202	0.974605	251	4.86262	1.00143	251	5.35686
P68363	Tubulin alpha-1B chain	TUBA1B	Tubulin alpha-1B chain OS=Homo sapiens OX=9606 GN=TUBA1B PE=1 SV=1 - [TBA1B_HUMAN]	64.52	2	22	227	451	50.1196	5.05908	0.900151	5	37.5292	1.02015	5	7.61121	0.915188	5	12.1129	1.04158	5	12.0361	1.1122	5	33.7603	0.965315	5	8.33952
Q9Y490	Talin-1	TLN1	Talin-1 OS=Homo sapiens OX=9606 GN=TLN1 PE=1 SV=3 - [TLN1_HUMAN]	57.93	100	116	280	2541	269.599	6.07471	1.03	239	7.29124	1.08657	239	7.05469	1.12432	239	8.23482	0.854468	239	12.7981	0.967882	239	7.56691	0.988941	239	6.1665
P29401	Transketolase	TKT	Transketolase OS=Homo sapiens OX=9606 GN=TKT PE=1 SV=3 - [TKT_HUMAN]	73.35	36	36	287	623	67.8347	7.66455	1.01258	286	9.98106	1.02107	286	4.93638	1.05194	286	6.57369	0.965701	286	7.71373	0.973022	286	9.49199	0.989702	286	7.15676
P07437	Tubulin beta chain	TUBB	Tubulin beta chain OS=Homo sapiens OX=9606 GN=TUBB PE=1 SV=2 - [TBB5_HUMAN]	74.1	4	24	230	444	49.639	4.89404	0.777534	22	16.1512	0.797754	22	12.7891	0.829935	22	6.54582	1.20751	22	9.83581	1.19085	22	9.07508	1.14703	22	6.61436
P68032	Actin, alpha cardiac muscle 1	ACTC1	Actin, alpha cardiac muscle 1 OS=Homo sapiens OX=9606 GN=ACTC1 PE=1 SV=1 - [ACTC_HUMAN]	46.95	5	15	383	377	41.9919	5.38916	1.01926	51	3.62995	1.01085	51	5.2116	1.06174	51	5.59212	0.931451	51	7.86277	1.05223	51	2.8824	0.984024	51	4.16474
P68371	Tubulin beta-4B chain	TUBB4B	Tubulin beta-4B chain OS=Homo sapiens OX=9606 GN=TUBB4B PE=1 SV=1 - [TBB4B_HUMAN]	73.93	1	24	230	445	49.799	4.89404	0.821718	14	8.2474	0.839072	14	9.58942	0.883522	14	7.37259	1.21927	14	9.63834	1.16682	14	5.09553	1.10058	14	5.59065
P31327	Carbamoyl-phosphate synthase [ammonia], mitochondrial	CPS1	Carbamoyl-phosphate synthase [ammonia], mitochondrial OS=Homo sapiens OX=9606 GN=CPS1 PE=1 SV=2 - [CPSM_HUMAN]	54.87	72	76	288	1500	164.835	6.7417	1.06623	277	9.1874	0.924242	277	5.5933	0.960244	277	4.5165	1.24529	277	9.40964	0.930542	277	7.88196	0.912789	277	7.57621
P68366	Tubulin alpha-4A chain	TUBA4A	Tubulin alpha-4A chain OS=Homo sapiens OX=9606 GN=TUBA4A PE=1 SV=1 - [TBA4A_HUMAN]	60.27	4	20	204	448	49.8924	5.05908	0.698445	27	14.55	0.689797	27	12.648	0.734047	27	12.9185	1.20073	27	10.0905	1.31948	27	6.62842	1.25277	27	5.50375
P04406	Glyceraldehyde-3-phosphate dehydrogenase	GAPDH	Glyceraldehyde-3-phosphate dehydrogenase OS=Homo sapiens OX=9606 GN=GAPDH PE=1 SV=3 - [G3P_HUMAN]	65.37	18	18	231	335	36.0304	8.45557	1.01559	230	8.09916	1.03617	230	5.58318	1.06814	230	7.0653	0.848879	230	11.5445	0.995534	230	7.4409	1.03962	230	4.98954
P04075	Fructose-bisphosphate aldolase A	ALDOA	Fructose-bisphosphate aldolase A OS=Homo sapiens OX=9606 GN=ALDOA PE=1 SV=2 - [ALDOA_HUMAN]	80.49	20	26	233	364	39.3953	8.08936	1.03251	191	8.36785	1.02398	191	6.33386	1.06585	191	7.85963	0.886728	191	12.9928	0.98833	191	5.7764	1.02351	191	6.14527
P16615	Sarcoplasmic/endoplasmic reticulum calcium ATPase 2	ATP2A2	Sarcoplasmic/endoplasmic reticulum calcium ATPase 2 OS=Homo sapiens OX=9606 GN=ATP2A2 PE=1 SV=1 - [AT2A2_HUMAN]	52.02	39	48	193	1042	114.683	5.33838	0.960259	159	6.38621	0.961266	159	5.3899	0.974904	159	5.69461	1.11372	159	7.83588	1.01696	159	7.25814	0.984511	159	7.08412
Q9BQE3	Tubulin alpha-1C chain	TUBA1C	Tubulin alpha-1C chain OS=Homo sapiens OX=9606 GN=TUBA1C PE=1 SV=1 - [TBA1C_HUMAN]	64.37	4	22	193	449	49.8635	5.09717	0.799229	11	6.73842	0.85055	11	5.06928	0.902042	11	2.75683	1.0974	11	11.298	1.20043	11	4.87989	1.10666	11	7.05111
P11142	Heat shock cognate 71 kDa protein	HSPA8	Heat shock cognate 71 kDa protein OS=Homo sapiens OX=9606 GN=HSPA8 PE=1 SV=1 - [HSP7C_HUMAN]	71.83	27	39	274	646	70.8542	5.51611	0.977472	163	8.23961	1.02259	163	5.08897	1.04075	163	6.06919	0.957426	163	9.95546	1.00351	163	8.06734	1	163	7.95727
Q13885	Tubulin beta-2A chain	TUBB2A	Tubulin beta-2A chain OS=Homo sapiens OX=9606 GN=TUBB2A PE=1 SV=1 - [TBB2A_HUMAN]	58.43	2	20	205	445	49.875	4.89404	0.770289	6	20.3172	0.718718	6	20.3395	0.73392	6	12.3053	1.28287	6	11.2399	1.17553	6	6.44214	1.19638	6	7.03443
P00558	Phosphoglycerate kinase 1	PGK1	Phosphoglycerate kinase 1 OS=Homo sapiens OX=9606 GN=PGK1 PE=1 SV=3 - [PGK1_HUMAN]	72.9	24	29	196	417	44.5861	8.104	1.07666	141	7.57641	1.0495	141	4.78915	1.09572	141	7.74961	0.839831	141	8.45075	0.959804	141	7.00136	0.994821	141	6.11393
P46821	Microtubule-associated protein 1B	MAP1B	Microtubule-associated protein 1B OS=Homo sapiens OX=9606 GN=MAP1B PE=1 SV=2 - [MAP1B_HUMAN]	45.62	92	93	241	2468	270.468	4.80518	0.886561	237	10.6952	0.891188	237	9.56521	0.914453	237	6.72061	1.11988	238	11.1462	1.08043	237	9.14663	1.09059	238	7.72665
P38646	Stress-70 protein, mitochondrial	HSPA9	Stress-70 protein, mitochondrial OS=Homo sapiens OX=9606 GN=HSPA9 PE=1 SV=2 - [GRP75_HUMAN]	69.81	43	44	204	679	73.6348	6.16357	0.964882	199	7.58014	0.898276	199	7.93125	0.909382	199	6.28438	1.20766	199	10.4178	1.01876	199	8.45004	0.987849	199	5.6085
P46940	Ras GTPase-activating-like protein IQGAP1	IQGAP1	Ras GTPase-activating-like protein IQGAP1 OS=Homo sapiens OX=9606 GN=IQGAP1 PE=1 SV=1 - [IQGA1_HUMAN]	48.94	65	69	180	1657	189.134	6.48096	0.992735	170	7.67309	0.98194	170	5.01645	1.01727	170	4.88946	1.00182	170	8.17971	1.00775	170	6.69061	1.01161	170	4.78218
P04083	Annexin A1	ANXA1	Annexin A1 OS=Homo sapiens OX=9606 GN=ANXA1 PE=1 SV=2 - [ANXA1_HUMAN]	72.54	23	23	202	346	38.69	7.02002	1.07867	201	7.90689	1.15248	201	7.16464	1.16424	201	9.86464	0.765156	201	16.9274	0.918392	201	8.41998	0.95709	201	6.75826
P02545	Prelamin-A/C	LMNA	Prelamin-A/C OS=Homo sapiens OX=9606 GN=LMNA PE=1 SV=1 - [LMNA_HUMAN]	68.37	45	48	229	664	74.0947	7.02002	0.971831	217	9.48706	0.890741	217	8.3959	0.910413	217	7.25786	1.17103	217	10.4812	1.02321	217	10.2264	1.00451	217	5.87408
P49327	Fatty acid synthase	FASN	Fatty acid synthase OS=Homo sapiens OX=9606 GN=FASN PE=1 SV=3 - [FAS_HUMAN]	42.09	83	85	204	2511	273.254	6.44287	0.86349	200	12.9722	0.936547	200	6.28642	0.971587	200	4.6919	0.945154	200	9.75991	1.10043	200	9.04351	1.14568	200	8.38228
P53396	ATP-citrate synthase	ACLY	ATP-citrate synthase OS=Homo sapiens OX=9606 GN=ACLY PE=1 SV=3 - [ACLY_HUMAN]	51.04	52	52	220	1101	120.762	7.32764	0.996487	220	7.61276	1.08805	220	5.91199	1.13316	220	8.30377	0.830551	220	12.2396	0.980242	220	8.56905	1.00462	220	7.43179
P09525	Annexin A4	ANXA4	Annexin A4 OS=Homo sapiens OX=9606 GN=ANXA4 PE=1 SV=4 - [ANXA4_HUMAN]	76.49	23	24	194	319	35.8601	6.12549	1.18485	172	10.8632	1.08409	172	5.93855	1.09697	172	8.0874	0.923317	172	8.4661	0.86751	172	11.7193	0.904516	172	8.69945
P06576	ATP synthase subunit beta, mitochondrial	ATP5F1B	ATP synthase subunit beta, mitochondrial OS=Homo sapiens OX=9606 GN=ATP5F1B PE=1 SV=3 - [ATPB_HUMAN]	63.52	23	23	137	529	56.5246	5.40186	0.982862	135	6.65525	0.908633	134	9.58981	0.916735	135	7.54282	1.18748	134	11.7681	1.02968	135	6.09376	0.982167	134	4.87469
P04350	Tubulin beta-4A chain	TUBB4A	Tubulin beta-4A chain OS=Homo sapiens OX=9606 GN=TUBB4A PE=1 SV=2 - [TBB4A_HUMAN]	67.12	2	22	169	444	49.5539	4.88135	0.78028	6	9.27844	0.911363	6	10.1628	0.831407	6	9.8073	1.14507	6	3.53894	1.17942	6	4.14645	1.10882	6	5.65938
P55072	Transitional endoplasmic reticulum ATPase	VCP	Transitional endoplasmic reticulum ATPase OS=Homo sapiens OX=9606 GN=VCP PE=1 SV=4 - [TERA_HUMAN]	67.87	44	45	156	806	89.2657	5.26221	0.985886	151	7.45704	1.00901	151	4.27746	1.03222	152	4.36096	0.944022	151	5.6303	1.03779	151	5.96633	1.00169	151	5.1086
P11413	Glucose-6-phosphate 1-dehydrogenase	G6PD	Glucose-6-phosphate 1-dehydrogenase OS=Homo sapiens OX=9606 GN=G6PD PE=1 SV=4 - [G6PD_HUMAN]	77.09	37	37	213	515	59.219	6.84424	1.05655	210	9.51689	1.07877	210	6.34268	1.13205	210	8.34954	0.846718	210	14.5947	0.945324	210	8.66847	0.991623	210	6.21171
P00338	L-lactate dehydrogenase A chain	LDHA	L-lactate dehydrogenase A chain OS=Homo sapiens OX=9606 GN=LDHA PE=1 SV=2 - [LDHA_HUMAN]	61.45	22	24	185	332	36.6654	8.26514	1.01953	148	10.7587	1.03472	148	4.86988	1.08761	148	6.43501	0.854234	148	11.7193	0.967131	148	8.83308	1.03368	148	9.40593
P35580	Myosin-10	MYH10	Myosin-10 OS=Homo sapiens OX=9606 GN=MYH10 PE=1 SV=3 - [MYH10_HUMAN]	38.92	55	75	180	1976	228.858	5.5415	1.03234	96	8.33892	1.05971	96	5.91253	1.07089	96	6.52141	0.979854	96	6.695	0.948657	96	8.12476	0.929507	96	8.36926
O60218	Aldo-keto reductase family 1 member B10	AKR1B10	Aldo-keto reductase family 1 member B10 OS=Homo sapiens OX=9606 GN=AKR1B10 PE=1 SV=2 - [AK1BA_HUMAN]	76.58	17	25	245	316	35.9968	7.84033	1.06368	146	10.0944	1.05051	146	6.73271	1.09231	146	8.86032	0.872039	147	10.562	0.947055	146	9.67198	0.98008	146	6.15044
P52209	6-phosphogluconate dehydrogenase, decarboxylating	PGD	6-phosphogluconate dehydrogenase, decarboxylating OS=Homo sapiens OX=9606 GN=PGD PE=1 SV=3 - [6PGD_HUMAN]	55.07	26	26	161	483	53.106	7.2251	1.03165	158	7.18868	1.08876	159	4.49013	1.13561	159	6.27108	0.840793	159	10.753	0.937296	159	8.04871	1.00893	159	6.36755
P14625	Endoplasmin	HSP90B1	Endoplasmin OS=Homo sapiens OX=9606 GN=HSP90B1 PE=1 SV=1 - [ENPL_HUMAN]	56.66	48	49	211	803	92.4113	4.84326	1.03384	191	7.41969	1.00458	191	4.88844	1.02299	191	4.88255	1.08207	191	7.74191	0.962881	191	8.15189	0.9374	191	8.19593
P0DMV9	Heat shock 70 kDa protein 1B	HSPA1B	Heat shock 70 kDa protein 1B OS=Homo sapiens OX=9606 GN=HSPA1B PE=1 SV=1 - [HS71B_HUMAN]	72.54	21	37	200	641	70.009	5.65576	1.03166	89	7.2387	0.997542	89	3.82612	1.018	89	5.56781	1.00262	89	5.83369	0.961074	89	8.15932	1.00512	89	5.53016
P42704	Leucine-rich PPR motif-containing protein, mitochondrial	LRPPRC	Leucine-rich PPR motif-containing protein, mitochondrial OS=Homo sapiens OX=9606 GN=LRPPRC PE=1 SV=3 - [LPPRC_HUMAN]	58.75	79	79	217	1394	157.805	6.12549	0.983219	217	7.17655	0.928483	217	5.55591	0.955064	217	4.77007	1.1055	217	6.59376	1.04313	217	6.79888	0.993975	217	4.94666
P62258	14-3-3 protein epsilon	YWHAE	14-3-3 protein epsilon OS=Homo sapiens OX=9606 GN=YWHAE PE=1 SV=1 - [1433E_HUMAN]	68.63	15	18	190	255	29.1554	4.7417	1.03656	168	6.00198	1.04557	168	5.85305	1.05102	168	6.88446	0.885321	168	7.98409	0.981531	168	5.10423	1.00872	168	7.05801
P07195	L-lactate dehydrogenase B chain	LDHB	L-lactate dehydrogenase B chain OS=Homo sapiens OX=9606 GN=LDHB PE=1 SV=2 - [LDHB_HUMAN]	54.19	17	19	156	334	36.6151	6.04932	1.04401	122	8.45458	1.0386	122	4.70146	1.0887	122	5.3458	0.854791	122	11.3117	0.98128	122	5.88193	1.00597	122	5.51682
Q13509	Tubulin beta-3 chain	TUBB3	Tubulin beta-3 chain OS=Homo sapiens OX=9606 GN=TUBB3 PE=1 SV=2 - [TBB3_HUMAN]	64.22	6	21	137	450	50.4003	4.93213	0.797489	10	11.9372	0.81937	10	14.5943	0.834363	10	9.80867	1.1009	10	10.5129	1.21386	10	7.59662	1.12418	10	4.56668
Q04828	Aldo-keto reductase family 1 member C1	AKR1C1	Aldo-keto reductase family 1 member C1 OS=Homo sapiens OX=9606 GN=AKR1C1 PE=1 SV=1 - [AK1C1_HUMAN]	76.78	2	21	183	323	36.765	7.88428	1.1022	8	7.97308	1.05824	8	2.19636	1.11026	8	6.22202	0.872708	8	6.07885	0.957589	8	5.24186	0.971784	8	3.1701
P13667	Protein disulfide-isomerase A4	PDIA4	Protein disulfide-isomerase A4 OS=Homo sapiens OX=9606 GN=PDIA4 PE=1 SV=2 - [PDIA4_HUMAN]	58.29	38	39	156	645	72.887	5.07178	1.04124	147	7.60252	0.986208	147	5.03797	1.00198	147	4.92073	1.09617	147	7.88736	0.957735	147	6.60572	0.932328	147	6.73711
P06748	Nucleophosmin	NPM1	Nucleophosmin OS=Homo sapiens OX=9606 GN=NPM1 PE=1 SV=2 - [NPM_HUMAN]	65.31	17	17	150	294	32.5548	4.77979	0.956176	140	9.04088	0.954908	140	5.1869	0.956702	140	6.15769	1.11356	140	8.28439	1.01763	140	6.13793	1.00772	140	6.14861
P11021	Endoplasmic reticulum chaperone BiP	HSPA5	Endoplasmic reticulum chaperone BiP OS=Homo sapiens OX=9606 GN=HSPA5 PE=1 SV=2 - [BIP_HUMAN]	61.47	37	40	211	654	72.2884	5.16064	0.952507	175	6.28537	0.882126	175	7.11229	0.903335	175	7.15875	1.25092	175	11.7904	1.00829	175	8.05654	0.996876	175	7.42603
P68104	Elongation factor 1-alpha 1	EEF1A1	Elongation factor 1-alpha 1 OS=Homo sapiens OX=9606 GN=EEF1A1 PE=1 SV=1 - [EF1A1_HUMAN]	74.68	16	26	183	462	50.1091	9.01221	0.960257	83	10.0225	0.988538	83	6.54332	1.03498	83	7.03698	0.88648	83	6.80077	1.05704	83	5.85439	1.05553	83	6.11351
P19338	Nucleolin	NCL	Nucleolin OS=Homo sapiens OX=9606 GN=NCL PE=1 SV=3 - [NUCL_HUMAN]	50.28	41	42	183	710	76.5684	4.70361	0.973771	182	9.71737	0.993301	182	5.22601	1.00528	182	6.44446	1.00991	182	8.43462	1.01176	182	8.28344	0.999199	182	8.62017
P07737	Profilin-1	PFN1	Profilin-1 OS=Homo sapiens OX=9606 GN=PFN1 PE=1 SV=2 - [PROF1_HUMAN]	87.86	10	10	130	140	15.0446	8.26514	1.02332	130	5.77982	1.10567	130	7.28373	1.06566	130	6.56848	0.837007	130	14.0035	0.96181	130	8.48536	1.0007	130	7.90525
P13639	Elongation factor 2	EEF2	Elongation factor 2 OS=Homo sapiens OX=9606 GN=EEF2 PE=1 SV=4 - [EF2_HUMAN]	61.42	48	51	199	858	95.277	6.82959	0.982951	192	9.53395	1.01442	192	5.26015	1.06781	192	7.04242	0.877087	192	10.7842	0.992601	192	7.54067	1.0502	192	6.97822
Q8IVF2	Protein AHNAK2	AHNAK2	Protein AHNAK2 OS=Homo sapiens OX=9606 GN=AHNAK2 PE=1 SV=2 - [AHNK2_HUMAN]	42.52	108	110	226	5795	616.242	5.36377	0.921894	217	8.27875	0.947682	217	5.55037	0.963569	217	5.30815	1.02114	217	6.856	1.08275	217	5.89815	1.04886	217	4.84124
Q9NY65	Tubulin alpha-8 chain	TUBA8	Tubulin alpha-8 chain OS=Homo sapiens OX=9606 GN=TUBA8 PE=1 SV=1 - [TBA8_HUMAN]	33.85	1	11	91	449	50.0616	5.05908	0.974594	1		0.913624	1		1.03278	1		1.02799	1		0.923758	1		1.13131	1
P42330	Aldo-keto reductase family 1 member C3	AKR1C3	Aldo-keto reductase family 1 member C3 OS=Homo sapiens OX=9606 GN=AKR1C3 PE=1 SV=4 - [AK1C3_HUMAN]	82.35	10	21	173	323	36.8298	7.94287	1.03566	60	8.43571	1.10723	60	5.9697	1.12881	60	8.05298	0.777365	60	13.8604	0.956042	60	6.06799	1.02072	60	7.49644
P18206	Vinculin	VCL	Vinculin OS=Homo sapiens OX=9606 GN=VCL PE=1 SV=4 - [VINC_HUMAN]	62.87	65	65	187	1134	123.722	5.65576	1.00472	186	7.31174	1.04545	186	5.64982	1.0947	186	6.7182	0.854829	186	10.2736	0.991064	186	6.11916	1.03382	186	6.3705
P52895	Aldo-keto reductase family 1 member C2	AKR1C2	Aldo-keto reductase family 1 member C2 OS=Homo sapiens OX=9606 GN=AKR1C2 PE=1 SV=3 - [AK1C2_HUMAN]	77.09	5	20	157	323	36.712	7.48877	1.01662	32	8.3938	1.14438	32	11.7747	1.21667	32	12.1363	0.756638	32	26.5392	0.947845	32	4.86379	0.978865	32	4.47727
P21796	Voltage-dependent anion-selective channel protein 1	VDAC1	Voltage-dependent anion-selective channel protein 1 OS=Homo sapiens OX=9606 GN=VDAC1 PE=1 SV=2 - [VDAC1_HUMAN]	79.51	16	18	89	283	30.7536	8.54346	0.93889	81	7.41604	0.87747	81	9.49627	0.902708	81	7.16917	1.1649	81	10.9123	1.03204	81	7.65557	1.04724	81	6.45229
Q08211	ATP-dependent RNA helicase A	DHX9	ATP-dependent RNA helicase A OS=Homo sapiens OX=9606 GN=DHX9 PE=1 SV=4 - [DHX9_HUMAN]	43.15	46	47	125	1270	140.869	6.84424	0.962976	124	9.2575	0.963968	124	6.28483	0.989621	124	5.0656	1.04079	124	8.59053	1.02177	124	6.4135	1.01912	124	9.2138
P78371	T-complex protein 1 subunit beta	CCT2	T-complex protein 1 subunit beta OS=Homo sapiens OX=9606 GN=CCT2 PE=1 SV=4 - [TCPB_HUMAN]	78.13	33	33	109	535	57.4521	6.45557	0.975816	109	6.61021	0.998555	109	5.88934	1.03071	109	5.27507	0.928429	109	8.91341	1.04535	109	6.63099	1.03031	109	4.92111
P0CG39	POTE ankyrin domain family member J	POTEJ	POTE ankyrin domain family member J OS=Homo sapiens OX=9606 GN=POTEJ PE=3 SV=1 - [POTEJ_HUMAN]	8.38	1	7	147	1038	117.315	5.97314	0.959665	20	4.51561	1.13155	20	16.2933	1.02581	20	7.04994	0.906144	20	11.0343	1.04437	20	7.39458	0.961482	20	4.02327
P63104	14-3-3 protein zeta/delta	YWHAZ	14-3-3 protein zeta/delta OS=Homo sapiens OX=9606 GN=YWHAZ PE=1 SV=1 - [1433Z_HUMAN]	77.96	16	22	152	245	27.7277	4.79248	1.02623	110	9.27637	1.04037	110	8.17134	1.05301	110	5.39076	0.860721	110	8.3941	0.988	110	8.21076	1.01888	110	6.11513
P26038	Moesin	MSN	Moesin OS=Homo sapiens OX=9606 GN=MSN PE=1 SV=3 - [MOES_HUMAN]	58.23	32	43	195	577	67.7778	6.40479	1.03899	140	7.00484	1.02115	140	5.31504	1.06169	140	6.22046	0.88872	140	8.40104	0.989495	140	6.82896	1.02556	140	6.48929
P50990	T-complex protein 1 subunit theta	CCT8	T-complex protein 1 subunit theta OS=Homo sapiens OX=9606 GN=CCT8 PE=1 SV=4 - [TCPQ_HUMAN]	65.51	34	34	131	548	59.5825	5.60498	0.98645	131	7.69027	0.984954	131	6.36562	1.01225	131	6.47455	0.94245	131	8.47231	1.05008	131	5.46771	1.02816	131	6.26616
O60701	UDP-glucose 6-dehydrogenase	UGDH	UDP-glucose 6-dehydrogenase OS=Homo sapiens OX=9606 GN=UGDH PE=1 SV=1 - [UGDH_HUMAN]	64.37	26	26	122	494	54.9893	7.12256	1.06981	122	9.62808	1.04313	122	5.15459	1.07638	122	7.80318	0.885696	122	10.8373	0.952304	122	9.09617	0.976336	122	6.14842
P07237	Protein disulfide-isomerase	P4HB	Protein disulfide-isomerase OS=Homo sapiens OX=9606 GN=P4HB PE=1 SV=3 - [PDIA1_HUMAN]	73.43	36	37	171	508	57.0807	4.86865	1.00672	170	8.37045	0.928831	170	6.46443	0.922356	170	6.96467	1.21567	170	8.11277	0.973939	170	8.09727	0.958742	170	7.49846
P60174	Triosephosphate isomerase	TPI1	Triosephosphate isomerase OS=Homo sapiens OX=9606 GN=TPI1 PE=1 SV=3 - [TPIS_HUMAN]	76.57	19	19	126	286	30.7717	5.92236	1.08807	126	9.47059	1.08417	126	6.9653	1.11203	126	8.2352	0.877971	126	11.9822	0.93984	126	9.4643	0.962347	126	7.40611
P22626	Heterogeneous nuclear ribonucleoproteins A2/B1	HNRNPA2B1	Heterogeneous nuclear ribonucleoproteins A2/B1 OS=Homo sapiens OX=9606 GN=HNRNPA2B1 PE=1 SV=2 - [ROA2_HUMAN]	52.97	15	20	150	353	37.4067	8.95361	1.03812	112	7.44717	1.03681	112	4.4601	1.02198	112	5.63919	1.03257	112	6.80658	0.982114	112	7.8585	0.945095	112	7.4024
Q05639	Elongation factor 1-alpha 2	EEF1A2	Elongation factor 1-alpha 2 OS=Homo sapiens OX=9606 GN=EEF1A2 PE=1 SV=1 - [EF1A2_HUMAN]	57.24	10	20	129	463	50.4383	9.02686	0.962823	29	18.8377	1.01638	29	6.42526	1.05291	29	4.48828	0.91954	29	6.08326	1.00432	29	6.05201	1.00965	29	7.00384
P27348	14-3-3 protein theta	YWHAQ	14-3-3 protein theta OS=Homo sapiens OX=9606 GN=YWHAQ PE=1 SV=1 - [1433T_HUMAN]	76.73	14	21	134	245	27.7468	4.77979	1.05297	77	8.95531	1.05552	77	5.76574	1.0683	77	5.17174	0.886992	77	6.85795	0.955964	77	9.45578	1.00808	77	5.23979
Q14764	Major vault protein	MVP	Major vault protein OS=Homo sapiens OX=9606 GN=MVP PE=1 SV=4 - [MVP_HUMAN]	57.11	39	39	109	893	99.2659	5.47803	1.02717	108	6.86005	0.957164	108	7.5922	0.988143	108	5.11581	1.03574	108	5.47902	1.0099	108	5.44085	1.00205	108	5.00849
P25705	ATP synthase subunit alpha, mitochondrial	ATP5F1A	ATP synthase subunit alpha, mitochondrial OS=Homo sapiens OX=9606 GN=ATP5F1A PE=1 SV=1 - [ATPA_HUMAN]	51.54	26	27	138	553	59.7136	9.12939	0.975529	131	6.75698	0.893545	131	7.65017	0.906377	131	6.78766	1.19295	131	11.1572	1.0106	131	5.43665	0.996828	131	5.93934
P0CG38	POTE ankyrin domain family member I	POTEI	POTE ankyrin domain family member I OS=Homo sapiens OX=9606 GN=POTEI PE=3 SV=1 - [POTEI_HUMAN]	8.09	1	7	137	1075	121.205	6.21436	0.408855	9	63.9072	2.3311	9	22.2414	0.973262	9	7.77912	0.795611	9	9.87928	0.90392	9	4.76979	0.735255	9	15.5181
P40939	Trifunctional enzyme subunit alpha, mitochondrial	HADHA	Trifunctional enzyme subunit alpha, mitochondrial OS=Homo sapiens OX=9606 GN=HADHA PE=1 SV=2 - [ECHA_HUMAN]	53.47	36	36	121	763	82.9469	9.0415	0.944451	121	5.61974	0.853965	121	8.82547	0.875102	121	7.97064	1.25379	121	11.491	1.03042	121	7.79968	1.01245	121	4.73382
Q562R1	Beta-actin-like protein 2	ACTBL2	Beta-actin-like protein 2 OS=Homo sapiens OX=9606 GN=ACTBL2 PE=1 SV=2 - [ACTBL_HUMAN]	23.4	3	8	173	376	41.976	5.59229	1.04291	12	9.99229	1.03741	12	4.73582	1.02003	12	1.85602	0.91348	12	6.38064	1.01939	12	7.28281	0.985106	12	7.29497
P22314	Ubiquitin-like modifier-activating enzyme 1	UBA1	Ubiquitin-like modifier-activating enzyme 1 OS=Homo sapiens OX=9606 GN=UBA1 PE=1 SV=3 - [UBA1_HUMAN]	42.25	35	35	93	1058	117.774	5.75732	1.0234	93	6.607	1.04248	93	6.45766	1.064	93	5.31909	0.936429	93	7.49079	0.96303	93	7.51605	1.01164	93	6.61572
Q9P2E9	Ribosome-binding protein 1	RRBP1	Ribosome-binding protein 1 OS=Homo sapiens OX=9606 GN=RRBP1 PE=1 SV=5 - [RRBP1_HUMAN]	66.03	71	73	155	1410	152.365	8.60205	1.01607	153	12.146	1.00479	153	8.84172	1.01421	153	8.79291	1.1105	153	11.878	0.924698	153	9.09975	0.940165	153	9.17073
P40926	Malate dehydrogenase, mitochondrial	MDH2	Malate dehydrogenase, mitochondrial OS=Homo sapiens OX=9606 GN=MDH2 PE=1 SV=3 - [MDHM_HUMAN]	65.98	19	19	114	338	35.4807	8.67529	0.957001	113	7.12185	0.869785	114	8.20877	0.886483	113	6.62447	1.20394	114	9.48294	1.05954	114	5.63632	1.01374	114	5.74141
P05023	Sodium/potassium-transporting ATPase subunit alpha-1	ATP1A1	Sodium/potassium-transporting ATPase subunit alpha-1 OS=Homo sapiens OX=9606 GN=ATP1A1 PE=1 SV=1 - [AT1A1_HUMAN]	46.33	44	44	117	1023	112.824	5.49072	1.01335	117	6.56031	0.983186	117	5.45379	0.999199	117	4.92064	1.05629	117	6.51263	0.984533	117	7.87708	0.968495	117	6.20601
P04264	Keratin, type II cytoskeletal 1	KRT1	Keratin, type II cytoskeletal 1 OS=Homo sapiens OX=9606 GN=KRT1 PE=1 SV=6 - [K2C1_HUMAN]	49.69	25	33	143	644	65.999	8.11865	0.933114	89	6.39048	0.711547	89	29.5649	0.766291	89	12.9689	1.15397	89	7.20572	1.12496	89	10.2106	1.25924	89	9.5311
Q15084	Protein disulfide-isomerase A6	PDIA6	Protein disulfide-isomerase A6 OS=Homo sapiens OX=9606 GN=PDIA6 PE=1 SV=1 - [PDIA6_HUMAN]	57.5	21	22	73	440	48.0913	5.08447	1.03775	72	8.83924	0.974157	72	4.7264	0.974869	72	4.56919	1.12738	72	5.58749	0.977598	72	10.2275	0.947187	72	8.47087
Q01813	ATP-dependent 6-phosphofructokinase, platelet type	PFKP	ATP-dependent 6-phosphofructokinase, platelet type OS=Homo sapiens OX=9606 GN=PFKP PE=1 SV=2 - [PFKAP_HUMAN]	44.13	28	33	98	784	85.5415	7.54736	0.926706	86	10.0422	0.975041	86	4.55304	1.01662	86	5.29408	0.918818	86	9.1744	1.03816	86	9.83343	1.09365	86	5.98463
Q92616	eIF-2-alpha kinase activator GCN1	GCN1	eIF-2-alpha kinase activator GCN1 OS=Homo sapiens OX=9606 GN=GCN1 PE=1 SV=6 - [GCN1_HUMAN]	34.07	80	80	133	2671	292.572	7.47412	0.994103	133	7.86173	1.01769	133	7.26473	1.05177	133	6.18543	0.93347	133	7.0635	1.00943	133	6.86534	1.01931	133	6.99251
Q16881	Thioredoxin reductase 1, cytoplasmic	TXNRD1	Thioredoxin reductase 1, cytoplasmic OS=Homo sapiens OX=9606 GN=TXNRD1 PE=1 SV=3 - [TRXR1_HUMAN]	56.24	29	30	127	649	70.8622	7.38623	0.998375	123	11.0465	1.00162	123	5.89183	1.04241	123	7.67853	0.922061	123	9.98786	0.990461	123	8.83712	1.0396	123	6.21987
P34931	Heat shock 70 kDa protein 1-like	HSPA1L	Heat shock 70 kDa protein 1-like OS=Homo sapiens OX=9606 GN=HSPA1L PE=1 SV=2 - [HS71L_HUMAN]	32.29	1	18	111	641	70.3313	6.02393	0.806731	1		0.846753	1		0.808839	1		1.51356	1		0.81162	1		1.16972	1
P16403	Histone H1.2	HIST1H1C	Histone H1.2 OS=Homo sapiens OX=9606 GN=HIST1H1C PE=1 SV=2 - [H12_HUMAN]	53.99	7	17	127	213	21.3517	10.9312	1.17634	25	10.4099	1.21311	25	3.55042	1.17714	25	9.71921	0.821162	25	8.11965	0.856993	25	15.6263	0.830639	25	10.2624
P62937	Peptidyl-prolyl cis-trans isomerase A	PPIA	Peptidyl-prolyl cis-trans isomerase A OS=Homo sapiens OX=9606 GN=PPIA PE=1 SV=2 - [PPIA_HUMAN]	69.09	14	16	148	165	18.0009	7.81104	1.04696	130	8.9291	1.08644	130	6.5759	1.07775	130	6.919	0.8543	130	12.9982	0.963174	130	8.82984	0.998634	130	4.73835
Q13011	Delta(3,5)-Delta(2,4)-dienoyl-CoA isomerase, mitochondrial	ECH1	Delta(3,5)-Delta(2,4)-dienoyl-CoA isomerase, mitochondrial OS=Homo sapiens OX=9606 GN=ECH1 PE=1 SV=2 - [ECH1_HUMAN]	69.51	18	18	83	328	35.7934	8.00146	0.872449	79	13.1363	0.854483	79	12.2385	0.851232	79	13.3523	1.22748	79	16.0851	1.08247	79	7.67576	1.06155	79	6.91425
P13929	Beta-enolase	ENO3	Beta-enolase OS=Homo sapiens OX=9606 GN=ENO3 PE=1 SV=5 - [ENOB_HUMAN]	25.58	3	9	68	434	46.9573	7.7085	1.0374	4	3.88175	1.11025	4	5.78538	1.10903	4	2.41931	0.885696	4	7.9673	0.931164	4	1.50583	0.973384	4	3.63553
P08195	4F2 cell-surface antigen heavy chain	SLC3A2	4F2 cell-surface antigen heavy chain OS=Homo sapiens OX=9606 GN=SLC3A2 PE=1 SV=3 - [4F2_HUMAN]	46.03	25	26	96	630	67.9517	5.0083	0.914664	91	8.63531	1.00156	91	4.14656	1.00694	91	5.24297	1.0258	91	5.95642	1.04656	91	10.6489	1.0088	91	5.58554
P10412	Histone H1.4	HIST1H1E	Histone H1.4 OS=Homo sapiens OX=9606 GN=HIST1H1E PE=1 SV=2 - [H14_HUMAN]	52.05	5	16	118	219	21.852	11.0337	1.09308	12	19.3708	1.09321	12	8.90873	1.08527	12	3.85135	0.951601	12	9.2019	0.893195	12	21.1159	0.911026	12	6.63269
P34932	Heat shock 70 kDa protein 4	HSPA4	Heat shock 70 kDa protein 4 OS=Homo sapiens OX=9606 GN=HSPA4 PE=1 SV=4 - [HSP74_HUMAN]	61.67	44	48	132	840	94.2712	5.18604	0.979768	124	7.23337	0.980221	124	5.13951	1.01568	124	5.30079	0.944131	124	7.3524	1.02801	124	6.50708	1.03635	124	6.28967
P62979	Ubiquitin-40S ribosomal protein S27a	RPS27A	Ubiquitin-40S ribosomal protein S27a OS=Homo sapiens OX=9606 GN=RPS27A PE=1 SV=2 - [RS27A_HUMAN]	66.03	3	11	115	156	17.9535	9.64209	0.987552	9	7.19211	1.12226	9	5.00592	1.02159	9	10.3938	0.865471	9	12.7064	0.982335	9	12.1204	1.03124	9	3.97842
P49588	Alanine--tRNA ligase, cytoplasmic	AARS	Alanine--tRNA ligase, cytoplasmic OS=Homo sapiens OX=9606 GN=AARS PE=1 SV=2 - [SYAC_HUMAN]	54.44	44	45	109	968	106.743	5.52881	0.99212	108	5.83654	1.04041	108	4.87803	1.09563	108	6.3134	0.875229	108	8.06302	0.993101	108	6.99174	1.02465	108	5.62952
P30101	Protein disulfide-isomerase A3	PDIA3	Protein disulfide-isomerase A3 OS=Homo sapiens OX=9606 GN=PDIA3 PE=1 SV=4 - [PDIA3_HUMAN]	55.84	28	28	114	505	56.7468	6.354	1.01181	113	9.18241	0.961533	113	6.41455	0.969026	113	6.90292	1.1287	113	11.2597	0.974364	113	8.35515	0.958938	113	6.40623
P61981	14-3-3 protein gamma	YWHAG	14-3-3 protein gamma OS=Homo sapiens OX=9606 GN=YWHAG PE=1 SV=2 - [1433G_HUMAN]	68.42	10	15	133	247	28.2849	4.89404	1.00705	64	6.28055	1.00914	64	9.50188	1.02381	64	5.67018	0.907376	64	7.82784	1.01324	64	7.1348	1.02856	64	8.54876
P16402	Histone H1.3	HIST1H1D	Histone H1.3 OS=Homo sapiens OX=9606 GN=HIST1H1D PE=1 SV=2 - [H13_HUMAN]	55.2	9	18	114	221	22.3363	11.019	1.07206	22	22.1387	1.17571	22	6.89154	1.16966	22	7.36331	0.83061	22	19.4203	0.914699	22	18.3505	0.869151	22	14.5216
P05091	Aldehyde dehydrogenase, mitochondrial	ALDH2	Aldehyde dehydrogenase, mitochondrial OS=Homo sapiens OX=9606 GN=ALDH2 PE=1 SV=2 - [ALDH2_HUMAN]	51.45	19	22	111	517	56.3456	7.04932	1.01875	63	7.30495	0.921414	63	6.54448	0.951315	63	5.55192	1.20909	63	6.9384	0.973659	63	5.62173	0.958999	63	6.70818
P23528	Cofilin-1	CFL1	Cofilin-1 OS=Homo sapiens OX=9606 GN=CFL1 PE=1 SV=3 - [COF1_HUMAN]	86.14	14	18	121	166	18.4907	8.08936	1.06894	99	10.1628	1.16791	99	6.26285	1.15187	99	9.98541	0.766974	99	12.5674	0.9083	99	15.5353	0.971923	99	8.07986
Q9NZM1	Myoferlin	MYOF	Myoferlin OS=Homo sapiens OX=9606 GN=MYOF PE=1 SV=1 - [MYOF_HUMAN]	46.24	83	83	165	2061	234.561	6.17627	0.898405	165	6.6931	0.914909	165	7.7961	0.908878	165	5.99463	1.08716	165	7.80747	1.07744	165	7.43079	1.07386	165	5.16658
Q16891	MICOS complex subunit MIC60	IMMT	MICOS complex subunit MIC60 OS=Homo sapiens OX=9606 GN=IMMT PE=1 SV=1 - [MIC60_HUMAN]	61.08	43	44	139	758	83.6264	6.48096	0.977342	138	7.03525	0.912811	138	6.7014	0.928517	138	5.94852	1.12548	138	9.29511	1.03124	138	5.81991	0.998264	138	7.40761
O75643	U5 small nuclear ribonucleoprotein 200 kDa helicase	SNRNP200	U5 small nuclear ribonucleoprotein 200 kDa helicase OS=Homo sapiens OX=9606 GN=SNRNP200 PE=1 SV=2 - [U520_HUMAN]	27.25	55	55	111	2136	244.353	6.06201	0.98773	108	6.52403	1.01803	108	6.60015	1.02974	108	6.36463	0.981534	108	7.0213	1.00345	108	4.65729	0.987575	108	6.28857
P49411	Elongation factor Tu, mitochondrial	TUFM	Elongation factor Tu, mitochondrial OS=Homo sapiens OX=9606 GN=TUFM PE=1 SV=2 - [EFTU_HUMAN]	65.27	26	26	108	452	49.5102	7.60596	0.985918	108	7.36815	0.899313	108	7.62226	0.9184	108	6.40533	1.16524	108	9.08729	1.03835	108	6.13323	0.993255	108	4.93729
P31948	Stress-induced-phosphoprotein 1	STIP1	Stress-induced-phosphoprotein 1 OS=Homo sapiens OX=9606 GN=STIP1 PE=1 SV=1 - [STIP1_HUMAN]	62.43	42	42	164	543	62.5994	6.80029	1.01548	163	6.33717	1.01696	163	4.45761	1.06193	163	4.96762	0.896504	163	7.6994	1.02351	163	9.10405	1.00259	163	4.54931
P09211	Glutathione S-transferase P	GSTP1	Glutathione S-transferase P OS=Homo sapiens OX=9606 GN=GSTP1 PE=1 SV=2 - [GSTP1_HUMAN]	52.38	9	9	61	210	23.341	5.64307	1.05619	61	7.99897	1.12008	61	6.47703	1.14022	61	10.8234	0.824541	61	15.9799	0.938875	61	9.47428	0.961377	61	5.51947
P61978	Heterogeneous nuclear ribonucleoprotein K	HNRNPK	Heterogeneous nuclear ribonucleoprotein K OS=Homo sapiens OX=9606 GN=HNRNPK PE=1 SV=1 - [HNRPK_HUMAN]	58.53	23	23	116	463	50.9444	5.5415	1.01838	115	7.40532	1.00546	115	5.23745	1.01857	115	5.84077	1.00661	116	6.26481	0.99137	115	6.52103	0.974799	116	7.20177
P31943	Heterogeneous nuclear ribonucleoprotein H	HNRNPH1	Heterogeneous nuclear ribonucleoprotein H OS=Homo sapiens OX=9606 GN=HNRNPH1 PE=1 SV=4 - [HNRH1_HUMAN]	49	8	19	91	449	49.1984	6.30322	0.963784	50	5.46585	1.02979	50	5.76335	0.999497	50	3.6018	0.979393	50	7.03344	1.07028	50	8.34748	0.974252	50	5.60952
P07814	Bifunctional glutamate/proline--tRNA ligase	EPRS	Bifunctional glutamate/proline--tRNA ligase OS=Homo sapiens OX=9606 GN=EPRS PE=1 SV=5 - [SYEP_HUMAN]	44.05	61	63	143	1512	170.483	7.32764	0.926801	134	9.80964	0.970421	134	5.27493	0.993909	134	5.24554	1.03275	134	7.08599	1.02552	134	7.59047	1.0458	134	7.19684
P54652	Heat shock-related 70 kDa protein 2	HSPA2	Heat shock-related 70 kDa protein 2 OS=Homo sapiens OX=9606 GN=HSPA2 PE=1 SV=1 - [HSP72_HUMAN]	43.82	13	25	129	639	69.9779	5.74463	1.20442	27	10.872	1.13938	27	8.08337	1.18754	27	8.99464	0.803317	27	14.7816	0.85472	27	9.0082	0.886798	27	8.13455
P30838	Aldehyde dehydrogenase, dimeric NADP-preferring	ALDH3A1	Aldehyde dehydrogenase, dimeric NADP-preferring OS=Homo sapiens OX=9606 GN=ALDH3A1 PE=1 SV=3 - [AL3A1_HUMAN]	52.98	19	20	112	453	50.3628	6.53662	1.10646	107	12.4567	0.970308	107	5.53739	1.02223	107	4.97823	0.972612	107	5.82781	0.942229	107	7.80931	0.973375	107	7.40764
P05556	Integrin beta-1	ITGB1	Integrin beta-1 OS=Homo sapiens OX=9606 GN=ITGB1 PE=1 SV=2 - [ITB1_HUMAN]	31.33	27	27	110	798	88.357	5.38916	0.943102	110	7.37727	0.9134	110	5.82421	0.904278	110	6.30216	1.1546	110	8.05154	1.05806	110	6.09434	1.01714	110	6.02002
P62805	Histone H4	HIST1H4A	Histone H4 OS=Homo sapiens OX=9606 GN=HIST1H4A PE=1 SV=2 - [H4_HUMAN]	51.46	6	6	108	103	11.3604	11.356	1.05636	108	11.3514	1.09211	108	5.38531	1.04183	108	6.92179	1.00388	108	7.11853	0.948264	108	8.52476	0.896878	108	7.80203
P06744	Glucose-6-phosphate isomerase	GPI	Glucose-6-phosphate isomerase OS=Homo sapiens OX=9606 GN=GPI PE=1 SV=4 - [G6PI_HUMAN]	53.76	26	27	136	558	63.1072	8.32373	1.03245	134	7.84826	1.0432	134	5.83043	1.09367	134	7.64077	0.895261	134	11.2789	0.945841	134	7.6999	1.02682	134	8.52426
P52272	Heterogeneous nuclear ribonucleoprotein M	HNRNPM	Heterogeneous nuclear ribonucleoprotein M OS=Homo sapiens OX=9606 GN=HNRNPM PE=1 SV=3 - [HNRPM_HUMAN]	60	41	41	111	730	77.4643	8.70459	0.988754	111	10.001	1.01972	111	4.33699	1.02204	111	6.08924	1.00642	111	6.34738	1.00032	111	5.836	0.972729	111	7.23932
P12956	X-ray repair cross-complementing protein 6	XRCC6	X-ray repair cross-complementing protein 6 OS=Homo sapiens OX=9606 GN=XRCC6 PE=1 SV=2 - [XRCC6_HUMAN]	52.38	34	35	112	609	69.7991	6.63916	1.0273	109	5.98094	1.00221	109	4.27172	1.01035	109	4.8565	1.03059	109	6.41207	0.989745	109	7.40948	0.96871	109	5.96075
P0DP24	Calmodulin-2	CALM2	Calmodulin-2 OS=Homo sapiens OX=9606 GN=CALM2 PE=1 SV=1 - [CALM2_HUMAN]	71.14	9	11	95	149	16.8268	4.22119	1.04949	84	8.30262	1.07733	84	6.32953	1.06713	84	6.06743	0.948775	84	5.53373	0.981572	84	7.81388	0.908683	84	7.70934
Q07065	Cytoskeleton-associated protein 4	CKAP4	Cytoskeleton-associated protein 4 OS=Homo sapiens OX=9606 GN=CKAP4 PE=1 SV=2 - [CKAP4_HUMAN]	65.28	38	40	107	602	65.9827	5.92236	0.992823	102	6.76342	0.900579	102	5.92766	0.922275	102	7.2973	1.19324	102	9.136	1.02904	102	8.18215	0.974757	102	5.82636
P09104	Gamma-enolase	ENO2	Gamma-enolase OS=Homo sapiens OX=9606 GN=ENO2 PE=1 SV=3 - [ENOG_HUMAN]	35.02	6	11	57	434	47.239	5.03369	1.06626	8	5.07847	0.961963	8	5.7797	0.963799	8	5.42931	1.01362	8	9.55059	0.993593	8	4.6293	1.00488	8	3.58001
Q06830	Peroxiredoxin-1	PRDX1	Peroxiredoxin-1 OS=Homo sapiens OX=9606 GN=PRDX1 PE=1 SV=1 - [PRDX1_HUMAN]	79.4	13	16	127	199	22.0963	8.1333	1.06217	106	6.79366	1.13171	106	7.6645	1.14532	106	10.3023	0.799409	106	11.4054	0.947895	106	7.54691	0.968777	106	6.01265
Q12797	Aspartyl/asparaginyl beta-hydroxylase	ASPH	Aspartyl/asparaginyl beta-hydroxylase OS=Homo sapiens OX=9606 GN=ASPH PE=1 SV=3 - [ASPH_HUMAN]	42.48	30	31	96	758	85.8095	5.0083	0.99082	88	10.4306	0.945676	88	5.31369	0.944986	88	5.34344	1.19639	88	7.1279	0.974073	88	8.02176	0.94172	88	7.28914
P11216	Glycogen phosphorylase, brain form	PYGB	Glycogen phosphorylase, brain form OS=Homo sapiens OX=9606 GN=PYGB PE=1 SV=5 - [PYGB_HUMAN]	49.94	31	38	96	843	96.6345	6.85889	0.976695	84	4.96826	0.90248	84	7.67665	0.928462	84	4.74426	1.08043	84	5.37356	1.04006	84	6.8415	1.0428	84	5.56293
P62987	Ubiquitin-60S ribosomal protein L40	UBA52	Ubiquitin-60S ribosomal protein L40 OS=Homo sapiens OX=9606 GN=UBA52 PE=1 SV=2 - [RL40_HUMAN]	58.59	1	9	108	128	14.719	9.83252	0.993242	2	8.23019	1.07762	2	2.94676	1.11032	2	12.7163	0.964117	2	19.0401	0.957695	2	0.784441	0.952787	2	3.18741
P33527	Multidrug resistance-associated protein 1	ABCC1	Multidrug resistance-associated protein 1 OS=Homo sapiens OX=9606 GN=ABCC1 PE=1 SV=3 - [MRP1_HUMAN]	32.79	43	46	94	1531	171.481	7.10791	0.991619	90	8.54627	0.950969	90	6.41241	0.947701	90	4.61615	1.11022	90	8.25537	1.0022	90	8.00981	0.982056	90	6.01465
Q02952	A-kinase anchor protein 12	AKAP12	A-kinase anchor protein 12 OS=Homo sapiens OX=9606 GN=AKAP12 PE=1 SV=4 - [AKA12_HUMAN]	43.77	63	63	123	1782	191.367	4.41162	0.909476	123	7.45802	0.957955	123	6.33436	0.973461	123	6.87722	1.08847	123	9.97088	1.04384	123	8.65925	1.02719	123	6.9497
P37802	Transgelin-2	TAGLN2	Transgelin-2 OS=Homo sapiens OX=9606 GN=TAGLN2 PE=1 SV=3 - [TAGL2_HUMAN]	83.92	14	14	71	199	22.3772	8.25049	0.990676	71	10.7337	1.13302	71	7.17022	1.12182	71	10.2125	0.835852	71	14.7153	0.938832	71	9.03481	1.01568	71	7.56679
P23396	40S ribosomal protein S3	RPS3	40S ribosomal protein S3 OS=Homo sapiens OX=9606 GN=RPS3 PE=1 SV=2 - [RS3_HUMAN]	80.25	19	19	94	243	26.6714	9.65674	0.973511	94	10.7768	0.998167	94	5.12744	1.01647	94	5.82001	0.976461	94	8.11331	1.00154	94	7.71839	1.02538	94	11.6411
Q00839	Heterogeneous nuclear ribonucleoprotein U	HNRNPU	Heterogeneous nuclear ribonucleoprotein U OS=Homo sapiens OX=9606 GN=HNRNPU PE=1 SV=6 - [HNRPU_HUMAN]	39.15	34	35	130	825	90.528	5.99854	1.01647	128	7.53948	1.01146	128	5.10317	1.04373	128	6.69753	1.00005	128	6.32846	0.977823	128	9.44923	0.988365	128	7.21116
Q86UP2	Kinectin	KTN1	Kinectin OS=Homo sapiens OX=9606 GN=KTN1 PE=1 SV=1 - [KTN1_HUMAN]	47.09	67	69	152	1357	156.179	5.64307	1.00688	150	7.07897	1.02347	150	6.08514	1.03221	150	5.01234	1.05945	150	5.37223	0.967161	150	6.37477	0.945314	150	6.43005
O60814	Histone H2B type 1-K	HIST1H2BK	Histone H2B type 1-K OS=Homo sapiens OX=9606 GN=HIST1H2BK PE=1 SV=3 - [H2B1K_HUMAN]	71.43	5	12	161	126	13.8816	10.3159	1.12808	71	6.46019	1.08434	71	7.54017	1.05575	71	5.1832	0.981505	71	8.39601	0.92639	71	7.2762	0.918397	71	11.415
Q99832	T-complex protein 1 subunit eta	CCT7	T-complex protein 1 subunit eta OS=Homo sapiens OX=9606 GN=CCT7 PE=1 SV=2 - [TCPH_HUMAN]	67.03	32	32	94	543	59.3289	7.6499	0.967676	94	6.44286	0.985384	94	3.61374	1.01933	94	6.02359	0.959087	94	7.74288	1.02428	94	6.37964	1.04224	94	6.61019
P15559	NAD(P)H dehydrogenase [quinone] 1	NQO1	NAD(P)H dehydrogenase [quinone] 1 OS=Homo sapiens OX=9606 GN=NQO1 PE=1 SV=1 - [NQO1_HUMAN]	41.97	14	14	94	274	30.848	8.88037	1.08539	93	10.1824	1.06494	93	7.29731	1.12364	93	8.09013	0.842055	93	10.2081	0.962422	93	7.42921	0.977162	93	8.99045
P40227	T-complex protein 1 subunit zeta	CCT6A	T-complex protein 1 subunit zeta OS=Homo sapiens OX=9606 GN=CCT6A PE=1 SV=3 - [TCPZ_HUMAN]	56.5	27	27	76	531	57.9876	6.68311	0.954473	76	10.0585	0.980138	76	3.10112	1.00518	76	6.01516	0.946081	76	8.01357	1.03584	76	9.96755	1.05499	76	8.42026
P31939	Bifunctional purine biosynthesis protein PURH	ATIC	Bifunctional purine biosynthesis protein PURH OS=Homo sapiens OX=9606 GN=ATIC PE=1 SV=3 - [PUR9_HUMAN]	69.76	29	29	59	592	64.5753	6.7124	1.00059	59	8.24852	1.04872	59	5.19106	1.06923	59	5.55771	0.899573	59	9.75497	1.0033	59	6.13073	1.02327	59	6.49827
O00299	Chloride intracellular channel protein 1	CLIC1	Chloride intracellular channel protein 1 OS=Homo sapiens OX=9606 GN=CLIC1 PE=1 SV=4 - [CLIC1_HUMAN]	84.65	15	16	46	241	26.9057	5.17334	0.988764	45	9.01441	1.05523	45	8.13291	1.05033	45	7.44203	0.87078	45	11.0931	0.982427	45	9.58408	1.06576	45	11.4668
Q8N257	Histone H2B type 3-B	HIST3H2BB	Histone H2B type 3-B OS=Homo sapiens OX=9606 GN=HIST3H2BB PE=1 SV=3 - [H2B3B_HUMAN]	67.46	4	11	110	126	13.8995	10.3159	1.09463	20	17.7319	1.07534	20	8.16217	1.03736	20	5.35097	1.03639	20	4.78204	0.97243	20	16.4329	0.902285	20	15.9807
P15311	Ezrin	EZR	Ezrin OS=Homo sapiens OX=9606 GN=EZR PE=1 SV=4 - [EZRI_HUMAN]	44.2	20	31	140	586	69.3697	6.26514	0.996188	83	6.78787	1.03047	83	6.11493	1.07424	83	6.28404	0.835768	83	10.1178	1.01244	83	5.63826	1.04485	83	4.54763
Q14974	Importin subunit beta-1	KPNB1	Importin subunit beta-1 OS=Homo sapiens OX=9606 GN=KPNB1 PE=1 SV=2 - [IMB1_HUMAN]	34.36	26	26	83	876	97.108	4.77979	1.02006	83	6.52169	1.04693	83	5.58387	1.07806	83	5.86962	0.929753	83	7.42602	0.973602	83	6.43048	0.985945	83	4.2781
Q12906	Interleukin enhancer-binding factor 3	ILF3	Interleukin enhancer-binding factor 3 OS=Homo sapiens OX=9606 GN=ILF3 PE=1 SV=3 - [ILF3_HUMAN]	37.25	23	30	97	894	95.2791	8.76318	1.00587	73	8.30679	1.00709	73	6.51275	1.02896	73	5.22206	1.02002	73	10.0979	0.991907	73	6.63422	0.977707	73	9.05953
P27816	Microtubule-associated protein 4	MAP4	Microtubule-associated protein 4 OS=Homo sapiens OX=9606 GN=MAP4 PE=1 SV=3 - [MAP4_HUMAN]	50.35	52	52	125	1152	120.93	5.42725	0.958541	124	9.12897	0.98868	124	5.70863	1.01284	125	7.06215	0.990031	124	10.0265	1.00799	125	8.26529	1.04427	124	9.49581
Q7Z406	Myosin-14	MYH14	Myosin-14 OS=Homo sapiens OX=9606 GN=MYH14 PE=1 SV=2 - [MYH14_HUMAN]	19.4	26	36	86	1995	227.732	5.60498	0.994635	32	7.56186	1.02208	32	7.36293	1.01243	32	8.92476	0.962292	32	9.59292	1.03664	32	9.79831	0.984817	32	6.22423
P35241	Radixin	RDX	Radixin OS=Homo sapiens OX=9606 GN=RDX PE=1 SV=1 - [RADI_HUMAN]	54.2	25	39	165	583	68.5214	6.3667	1.03731	92	7.10205	1.11891	92	7.05295	1.15232	92	6.99308	0.802581	92	12.5854	0.980422	92	4.88342	0.962834	92	6.23507
P60842	Eukaryotic initiation factor 4A-I	EIF4A1	Eukaryotic initiation factor 4A-I OS=Homo sapiens OX=9606 GN=EIF4A1 PE=1 SV=1 - [IF4A1_HUMAN]	58.13	12	24	107	406	46.1246	5.47803	0.943632	63	9.8042	1.01468	63	9.98632	1.02101	63	5.9245	0.886309	63	10.2381	1.01992	63	14.1595	1.05232	63	5.67845
Q12931	Heat shock protein 75 kDa, mitochondrial	TRAP1	Heat shock protein 75 kDa, mitochondrial OS=Homo sapiens OX=9606 GN=TRAP1 PE=1 SV=3 - [TRAP1_HUMAN]	50.14	32	33	94	704	80.0597	8.20654	0.970621	80	7.06675	0.918412	80	4.7615	0.945684	80	4.64426	1.15553	80	7.91581	1.00461	80	7.07347	1.00058	80	6.7807
P45880	Voltage-dependent anion-selective channel protein 2	VDAC2	Voltage-dependent anion-selective channel protein 2 OS=Homo sapiens OX=9606 GN=VDAC2 PE=1 SV=2 - [VDAC2_HUMAN]	67.35	14	15	57	294	31.5465	7.56201	0.94158	56	5.48101	0.862839	56	6.92804	0.872561	56	7.63947	1.24512	56	7.15032	1.02627	56	6.32037	1.02823	56	6.67097
P08758	Annexin A5	ANXA5	Annexin A5 OS=Homo sapiens OX=9606 GN=ANXA5 PE=1 SV=2 - [ANXA5_HUMAN]	74.38	21	22	82	320	35.9144	5.04639	1.04124	61	6.34474	0.992553	61	3.76341	1.00963	61	4.55386	0.93909	61	6.43148	0.980919	61	6.41845	1.02508	61	4.64957
P23246	Splicing factor, proline- and glutamine-rich	SFPQ	Splicing factor, proline- and glutamine-rich OS=Homo sapiens OX=9606 GN=SFPQ PE=1 SV=2 - [SFPQ_HUMAN]	42.29	27	29	106	707	76.1016	9.43701	1.00892	97	8.81072	0.993624	97	6.28844	1.01592	97	6.94319	0.994331	97	7.65387	0.97232	97	7.84005	0.992461	97	7.17731
P67936	Tropomyosin alpha-4 chain	TPM4	Tropomyosin alpha-4 chain OS=Homo sapiens OX=9606 GN=TPM4 PE=1 SV=3 - [TPM4_HUMAN]	73.39	10	26	139	248	28.5045	4.69092	0.990531	41	8.88621	1.0202	41	6.66042	1.0023	41	4.07083	0.928613	41	6.53136	1.07304	41	8.31488	0.984865	41	4.09298
P35221	Catenin alpha-1	CTNNA1	Catenin alpha-1 OS=Homo sapiens OX=9606 GN=CTNNA1 PE=1 SV=1 - [CTNA1_HUMAN]	52.54	31	41	94	906	100.009	6.29053	1.03713	74	6.88916	1.04705	74	4.9328	1.04664	74	4.57608	0.999157	74	7.15587	0.966361	74	8.64724	0.94976	74	6.63248
Q7KZF4	Staphylococcal nuclease domain-containing protein 1	SND1	Staphylococcal nuclease domain-containing protein 1 OS=Homo sapiens OX=9606 GN=SND1 PE=1 SV=1 - [SND1_HUMAN]	45.38	38	38	85	910	101.934	7.1665	0.97642	83	7.52626	1.01611	83	6.31888	1.02045	83	6.96496	0.964073	83	6.19994	1.02679	83	7.34007	1.00521	83	4.8511
P17987	T-complex protein 1 subunit alpha	TCP1	T-complex protein 1 subunit alpha OS=Homo sapiens OX=9606 GN=TCP1 PE=1 SV=1 - [TCPA_HUMAN]	61.15	28	28	80	556	60.3056	6.11279	0.961278	76	10.6456	0.975148	75	6.33103	0.999598	76	6.31116	0.926248	76	6.36657	1.01779	76	9.62751	1.06071	76	7.57418
P48643	T-complex protein 1 subunit epsilon	CCT5	T-complex protein 1 subunit epsilon OS=Homo sapiens OX=9606 GN=CCT5 PE=1 SV=1 - [TCPE_HUMAN]	65.62	33	34	106	541	59.6328	5.65576	0.992275	96	9.4693	0.988918	96	4.73589	1.0321	96	3.80996	0.93073	96	6.68892	1.03091	96	7.70654	1.02206	96	4.15359
Q00341	Vigilin	HDLBP	Vigilin OS=Homo sapiens OX=9606 GN=HDLBP PE=1 SV=2 - [VIGLN_HUMAN]	42.35	49	50	101	1268	141.368	6.87354	1.03494	95	6.76224	1.05264	95	4.73977	1.07639	95	6.22372	0.938576	95	7.21401	0.973158	95	5.20137	0.971106	95	7.1286
P37837	Transaldolase	TALDO1	Transaldolase OS=Homo sapiens OX=9606 GN=TALDO1 PE=1 SV=2 - [TALDO_HUMAN]	49.85	21	21	115	337	37.5165	6.81494	1.06855	115	8.34572	0.980782	115	5.08766	1.02735	115	4.84274	0.994942	115	5.12385	0.992789	115	8.5979	0.962309	115	6.04483
P63241	Eukaryotic translation initiation factor 5A-1	EIF5A	Eukaryotic translation initiation factor 5A-1 OS=Homo sapiens OX=9606 GN=EIF5A PE=1 SV=2 - [IF5A1_HUMAN]	79.87	10	10	91	154	16.8214	5.23682	1.09527	84	9.15289	1.06889	84	6.46665	1.07588	84	6.42825	0.830341	84	9.4505	0.955187	84	7.60747	0.976688	84	5.99157
P13804	Electron transfer flavoprotein subunit alpha, mitochondrial	ETFA	Electron transfer flavoprotein subunit alpha, mitochondrial OS=Homo sapiens OX=9606 GN=ETFA PE=1 SV=1 - [ETFA_HUMAN]	57.96	15	15	54	333	35.0576	8.38232	0.979807	54	5.85777	0.835685	54	9.13557	0.855461	54	7.42031	1.28907	54	9.58107	1.02408	54	8.25319	1.00641	54	3.93667
P35749	Myosin-11	MYH11	Myosin-11 OS=Homo sapiens OX=9606 GN=MYH11 PE=1 SV=3 - [MYH11_HUMAN]	9.53	1	21	84	1972	227.199	5.50342	0.958691	1		1.00176	1		1.08436	1		0.904656	1		1.09622	1		1.00043	1
P07339	Cathepsin D	CTSD	Cathepsin D OS=Homo sapiens OX=9606 GN=CTSD PE=1 SV=1 - [CATD_HUMAN]	46.12	15	15	64	412	44.5236	6.53662	1.02646	64	8.22189	0.876477	64	9.86134	0.873261	64	8.43067	1.25153	64	16.0752	1.00271	64	5.12893	0.95119	64	7.12519
P13797	Plastin-3	PLS3	Plastin-3 OS=Homo sapiens OX=9606 GN=PLS3 PE=1 SV=4 - [PLST_HUMAN]	61.27	32	37	112	630	70.7662	5.60498	0.993208	90	6.39262	1.0708	90	6.30867	1.11698	90	6.70281	0.827315	90	10.3497	0.989885	90	7.39834	1.0293	90	6.13506
Q16555	Dihydropyrimidinase-related protein 2	DPYSL2	Dihydropyrimidinase-related protein 2 OS=Homo sapiens OX=9606 GN=DPYSL2 PE=1 SV=1 - [DPYL2_HUMAN]	58.39	24	24	64	572	62.2546	6.37939	0.996874	64	4.06412	1.00802	64	4.95929	1.05521	64	5.91386	0.908366	64	9.54636	1.02722	64	6.34405	1.03848	64	3.82774
P31946	14-3-3 protein beta/alpha	YWHAB	14-3-3 protein beta/alpha OS=Homo sapiens OX=9606 GN=YWHAB PE=1 SV=3 - [1433B_HUMAN]	58.94	7	15	115	246	28.0648	4.83057	1.03734	26	3.78057	1.05162	26	4.43699	1.08016	26	4.39505	0.846306	26	6.81878	0.974608	26	7.77665	1.0683	26	5.97006
P09651	Heterogeneous nuclear ribonucleoprotein A1	HNRNPA1	Heterogeneous nuclear ribonucleoprotein A1 OS=Homo sapiens OX=9606 GN=HNRNPA1 PE=1 SV=5 - [ROA1_HUMAN]	42.74	4	16	96	372	38.7231	9.12939	0.782104	13	8.82402	1.03295	13	6.22711	0.938429	13	5.32626	1.00004	13	5.91325	1.2824	13	23.3135	0.954241	13	9.46832
P09972	Fructose-bisphosphate aldolase C	ALDOC	Fructose-bisphosphate aldolase C OS=Homo sapiens OX=9606 GN=ALDOC PE=1 SV=2 - [ALDOC_HUMAN]	27.2	3	9	62	364	39.4312	6.87354	1.02011	22	9.9934	1.02892	22	8.44864	1.0127	22	10.5955	0.919882	22	17.5108	1.01973	22	4.69724	0.999643	22	8.28286
P13645	Keratin, type I cytoskeletal 10	KRT10	Keratin, type I cytoskeletal 10 OS=Homo sapiens OX=9606 GN=KRT10 PE=1 SV=6 - [K1C10_HUMAN]	48.29	17	22	75	584	58.7917	5.21143	0.885573	49	8.92042	0.730801	49	22.2207	0.87117	49	9.44176	1.2179	49	10.6154	1.13022	49	7.88113	1.11053	49	7.65346
O43795	Unconventional myosin-Ib	MYO1B	Unconventional myosin-Ib OS=Homo sapiens OX=9606 GN=MYO1B PE=1 SV=3 - [MYO1B_HUMAN]	38.2	43	44	101	1136	131.902	9.37842	0.96665	100	6.00851	0.986538	100	5.11339	1.02099	100	5.53569	1.02281	100	5.82371	1.00063	100	6.25563	1.01802	100	6.39669
P17655	Calpain-2 catalytic subunit	CAPN2	Calpain-2 catalytic subunit OS=Homo sapiens OX=9606 GN=CAPN2 PE=1 SV=6 - [CAN2_HUMAN]	47.57	25	26	75	700	79.9448	4.98291	0.914757	65	7.30489	0.938789	65	5.13359	0.983959	65	4.68099	0.927611	65	6.50336	1.06406	65	8.64719	1.13316	65	7.26493
P30153	Serine/threonine-protein phosphatase 2A 65 kDa regulatory subunit A alpha isoform	PPP2R1A	Serine/threonine-protein phosphatase 2A 65 kDa regulatory subunit A alpha isoform OS=Homo sapiens OX=9606 GN=PPP2R1A PE=1 SV=4 - [2AAA_HUMAN]	50.42	26	26	66	589	65.2669	5.10986	0.995784	61	8.72499	1.043	61	7.46822	1.05592	61	8.24004	0.896351	61	6.05375	0.964124	61	8.99918	1.03918	61	8.2275
P00367	Glutamate dehydrogenase 1, mitochondrial	GLUD1	Glutamate dehydrogenase 1, mitochondrial OS=Homo sapiens OX=9606 GN=GLUD1 PE=1 SV=2 - [DHE3_HUMAN]	50.36	10	26	85	558	61.3592	7.79639	0.99217	38	7.30684	0.884472	38	11.1172	0.870573	38	7.87679	1.26988	38	16.3155	1.00523	38	5.69905	0.98498	38	6.90208
Q14697	Neutral alpha-glucosidase AB	GANAB	Neutral alpha-glucosidase AB OS=Homo sapiens OX=9606 GN=GANAB PE=1 SV=3 - [GANAB_HUMAN]	33.16	31	31	91	944	106.807	6.13818	1.00628	90	9.82479	0.965623	90	4.68594	0.991101	90	5.77562	1.10346	90	8.38809	0.99336	90	8.74448	0.960366	90	9.78059
C9JRZ8	Aldo-keto reductase family 1 member B15	AKR1B15	Aldo-keto reductase family 1 member B15 OS=Homo sapiens OX=9606 GN=AKR1B15 PE=1 SV=2 - [AK1BF_HUMAN]	41.14	1	10	102	316	36.5138	6.69775	1.03265	1		1.08969	1		1.14227	1		0.868827	1		0.991935	1		0.949032	1
P18669	Phosphoglycerate mutase 1	PGAM1	Phosphoglycerate mutase 1 OS=Homo sapiens OX=9606 GN=PGAM1 PE=1 SV=2 - [PGAM1_HUMAN]	73.23	15	15	85	254	28.7858	7.18115	1.07484	84	9.37683	1.05939	85	5.96018	1.08783	85	6.57454	0.845587	85	14.2426	0.955515	85	9.2918	0.988407	85	6.2892
P21980	Protein-glutamine gamma-glutamyltransferase 2	TGM2	Protein-glutamine gamma-glutamyltransferase 2 OS=Homo sapiens OX=9606 GN=TGM2 PE=1 SV=2 - [TGM2_HUMAN]	39.01	24	24	78	687	77.2797	5.22412	1.02017	74	6.49607	0.939823	74	4.60106	0.986946	74	4.44284	0.994019	74	6.37171	0.979503	74	7.78582	1.05959	74	4.6303
Q92841	Probable ATP-dependent RNA helicase DDX17	DDX17	Probable ATP-dependent RNA helicase DDX17 OS=Homo sapiens OX=9606 GN=DDX17 PE=1 SV=2 - [DDX17_HUMAN]	43.35	21	29	86	729	80.222	8.26514	0.96628	50	7.09395	0.967881	50	4.04002	0.987144	50	3.3236	1.02991	50	7.42422	1.03929	50	7.51238	1.01382	50	6.15043
Q92598	Heat shock protein 105 kDa	HSPH1	Heat shock protein 105 kDa OS=Homo sapiens OX=9606 GN=HSPH1 PE=1 SV=1 - [HS105_HUMAN]	44.52	27	32	76	858	96.8037	5.38916	0.954454	56	9.70945	0.966278	56	5.36315	0.995384	56	4.74171	0.963323	56	9.31967	1.05786	56	6.75241	1.05687	56	6.13684
Q15365	Poly(rC)-binding protein 1	PCBP1	Poly(rC)-binding protein 1 OS=Homo sapiens OX=9606 GN=PCBP1 PE=1 SV=2 - [PCBP1_HUMAN]	59.55	9	15	64	356	37.4739	7.09326	1.016	27	5.50347	1.03602	27	4.16652	1.05718	27	5.99657	0.899707	27	11.9797	0.981047	27	5.00227	1.04862	27	6.30988
P12270	Nucleoprotein TPR	TPR	Nucleoprotein TPR OS=Homo sapiens OX=9606 GN=TPR PE=1 SV=3 - [TPR_HUMAN]	32.88	76	77	121	2363	267.131	5.021	1.07798	118	6.64245	1.04765	118	5.62124	1.06449	118	6.60611	0.986856	118	5.96931	0.926526	118	7.17187	0.927504	118	8.10952
P63244	Receptor of activated protein C kinase 1	RACK1	Receptor of activated protein C kinase 1 OS=Homo sapiens OX=9606 GN=RACK1 PE=1 SV=3 - [RACK1_HUMAN]	63.41	18	18	66	317	35.0546	7.69385	1.04063	65	9.0319	1.02283	65	4.91302	1.05211	65	5.94944	0.978776	65	6.45357	0.958809	65	7.84705	1.00693	65	8.93474
P09493	Tropomyosin alpha-1 chain	TPM1	Tropomyosin alpha-1 chain OS=Homo sapiens OX=9606 GN=TPM1 PE=1 SV=2 - [TPM1_HUMAN]	56.69	6	25	122	284	32.6887	4.7417	0.97407	26	11.6657	1.06328	26	5.05978	1.02517	26	4.68558	0.881426	26	4.81398	1.10908	26	18.7957	0.973355	26	2.75687
P25398	40S ribosomal protein S12	RPS12	40S ribosomal protein S12 OS=Homo sapiens OX=9606 GN=RPS12 PE=1 SV=3 - [RS12_HUMAN]	71.21	9	9	51	132	14.5055	7.21045	1.04134	51	5.61905	1.02785	51	5.84224	1.01789	51	4.78322	1.00181	51	5.22882	1.0131	51	5.80067	0.939921	51	5.92516
P50395	Rab GDP dissociation inhibitor beta	GDI2	Rab GDP dissociation inhibitor beta OS=Homo sapiens OX=9606 GN=GDI2 PE=1 SV=2 - [GDIB_HUMAN]	65.62	18	25	84	445	50.6309	6.46826	1.01422	68	9.80888	1.04239	68	5.69455	1.09002	68	8.13811	0.818375	68	11.1001	1.00345	68	8.8626	1.04731	68	8.85223
P49748	Very long-chain specific acyl-CoA dehydrogenase, mitochondrial	ACADVL	Very long-chain specific acyl-CoA dehydrogenase, mitochondrial OS=Homo sapiens OX=9606 GN=ACADVL PE=1 SV=1 - [ACADV_HUMAN]	48.09	26	26	68	655	70.3454	8.74854	0.901179	68	9.5548	0.783693	68	8.37695	0.812009	68	8.72462	1.35071	68	10.0438	1.06578	68	7.31057	1.04455	68	7.1588
Q6P2Q9	Pre-mRNA-processing-splicing factor 8	PRPF8	Pre-mRNA-processing-splicing factor 8 OS=Homo sapiens OX=9606 GN=PRPF8 PE=1 SV=2 - [PRP8_HUMAN]	27.58	62	63	109	2335	273.427	8.83643	1.01367	106	7.14282	1.00979	106	5.63561	1.02144	106	6.10978	0.999451	106	5.73047	0.971152	106	7.03851	0.994224	106	7.76419
Q9UQ80	Proliferation-associated protein 2G4	PA2G4	Proliferation-associated protein 2G4 OS=Homo sapiens OX=9606 GN=PA2G4 PE=1 SV=3 - [PA2G4_HUMAN]	65.48	21	22	100	394	43.7592	6.55127	0.99651	93	5.34238	0.972562	93	7.36113	1.00102	93	6.10023	0.967716	93	7.34268	1.05265	93	6.87392	1.01106	93	6.90843
Q9BUF5	Tubulin beta-6 chain	TUBB6	Tubulin beta-6 chain OS=Homo sapiens OX=9606 GN=TUBB6 PE=1 SV=1 - [TBB6_HUMAN]	34.98	3	15	89	446	49.825	4.88135	0.808421	13	24.5124	0.786754	13	21.5446	0.764488	13	15.3531	1.16356	13	13.6241	1.20601	13	11.6296	1.17531	13	8.92754
O00571	ATP-dependent RNA helicase DDX3X	DDX3X	ATP-dependent RNA helicase DDX3X OS=Homo sapiens OX=9606 GN=DDX3X PE=1 SV=3 - [DDX3X_HUMAN]	52.42	32	33	87	662	73.198	7.18115	1.00541	81	6.41265	1.02112	81	5.16149	1.05031	81	4.35038	0.950972	81	6.83407	1.01533	81	6.09187	0.982869	81	4.92951
Q63HN8	E3 ubiquitin-protein ligase RNF213	RNF213	E3 ubiquitin-protein ligase RNF213 OS=Homo sapiens OX=9606 GN=RNF213 PE=1 SV=3 - [RN213_HUMAN]	15	71	72	104	5207	591.03	6.48096	1.02822	101	8.79386	1.07958	101	7.13978	1.10851	101	6.84256	0.907902	101	8.87102	0.948925	101	6.3599	0.9624	101	7.18827
P09936	Ubiquitin carboxyl-terminal hydrolase isozyme L1	UCHL1	Ubiquitin carboxyl-terminal hydrolase isozyme L1 OS=Homo sapiens OX=9606 GN=UCHL1 PE=1 SV=2 - [UCHL1_HUMAN]	53.81	10	11	72	223	24.8085	5.47803	1.0563	65	9.56172	1.07977	65	5.65042	1.08527	65	6.47258	0.872912	65	7.16456	0.91211	65	9.74345	0.980475	65	8.14695
Q8WUM4	Programmed cell death 6-interacting protein	PDCD6IP	Programmed cell death 6-interacting protein OS=Homo sapiens OX=9606 GN=PDCD6IP PE=1 SV=1 - [PDC6I_HUMAN]	44.82	40	41	99	868	95.9631	6.52197	1.0317	97	7.716	1.05366	97	4.69514	1.09185	97	5.88633	0.885506	97	8.21881	0.967868	97	6.31265	1.00788	97	5.57161
P27797	Calreticulin	CALR	Calreticulin OS=Homo sapiens OX=9606 GN=CALR PE=1 SV=1 - [CALR_HUMAN]	59.95	23	23	105	417	48.1118	4.43701	1.01683	105	9.15236	0.995567	105	3.83384	1.00844	105	4.94787	1.0491	105	7.67115	1.00052	105	7.84244	0.940211	105	8.49024
P27708	CAD protein	CAD	CAD protein OS=Homo sapiens OX=9606 GN=CAD PE=1 SV=3 - [PYR1_HUMAN]	24.36	42	47	84	2225	242.829	6.45557	0.977216	70	10.2421	1.03762	70	8.68447	1.03083	70	8.32731	0.933203	70	11.9421	1.00429	70	9.58173	1.0349	70	9.09688
Q86VP6	Cullin-associated NEDD8-dissociated protein 1	CAND1	Cullin-associated NEDD8-dissociated protein 1 OS=Homo sapiens OX=9606 GN=CAND1 PE=1 SV=2 - [CAND1_HUMAN]	36.59	38	40	79	1230	136.289	5.78271	0.975399	74	8.84047	1.04037	74	5.73283	1.06451	74	6.91161	0.900064	74	8.18947	0.974711	74	6.56148	1.03352	74	7.76332
P49368	T-complex protein 1 subunit gamma	CCT3	T-complex protein 1 subunit gamma OS=Homo sapiens OX=9606 GN=CCT3 PE=1 SV=4 - [TCPG_HUMAN]	58.9	35	35	100	545	60.4953	6.49365	0.966053	99	7.19175	0.999262	99	5.60737	1.01927	99	6.56192	0.945433	99	7.76757	1.02901	99	9.64748	1.02914	99	6.26973
P50991	T-complex protein 1 subunit delta	CCT4	T-complex protein 1 subunit delta OS=Homo sapiens OX=9606 GN=CCT4 PE=1 SV=4 - [TCPD_HUMAN]	58.81	28	30	81	539	57.8878	7.82568	0.958153	70	8.56603	1.0009	70	5.02199	1.01029	70	4.95088	0.939404	70	7.09396	1.01578	70	11.0344	1.04733	70	6.72379
P27824	Calnexin	CANX	Calnexin OS=Homo sapiens OX=9606 GN=CANX PE=1 SV=2 - [CALX_HUMAN]	41.55	27	29	106	592	67.5259	4.60205	0.991566	103	12.1366	0.928789	103	4.72025	0.958268	103	6.5054	1.18647	103	9.44984	1.00767	103	8.24611	0.951309	103	8.3614
P35527	Keratin, type I cytoskeletal 9	KRT9	Keratin, type I cytoskeletal 9 OS=Homo sapiens OX=9606 GN=KRT9 PE=1 SV=3 - [K1C9_HUMAN]	46.71	21	23	51	623	62.0268	5.23682	0.954583	44	7.05829	0.67239	44	34.2594	0.795517	44	20.0987	1.12542	44	10.1139	1.13095	44	11.6071	1.28414	44	11.2336
P54136	Arginine--tRNA ligase, cytoplasmic	RARS	Arginine--tRNA ligase, cytoplasmic OS=Homo sapiens OX=9606 GN=RARS PE=1 SV=2 - [SYRC_HUMAN]	48.48	30	30	69	660	75.3309	6.68311	0.9938	67	6.72061	0.992749	67	4.89839	1.01681	67	4.46064	0.985336	67	6.25008	1.02645	67	5.75255	1.01087	67	3.77636
Q27J81	Inverted formin-2	INF2	Inverted formin-2 OS=Homo sapiens OX=9606 GN=INF2 PE=1 SV=2 - [INF2_HUMAN]	29.78	26	27	50	1249	135.54	5.37646	0.977759	46	5.83933	1.02603	46	5.4707	1.02956	46	5.21143	0.987631	46	7.30052	0.997338	46	5.64762	0.999572	46	5.24627
P07602	Prosaposin	PSAP	Prosaposin OS=Homo sapiens OX=9606 GN=PSAP PE=1 SV=2 - [SAP_HUMAN]	37.02	17	17	89	524	58.0739	5.17334	1.17471	89	12.5985	0.966306	89	8.0443	0.971829	89	9.09342	1.11401	89	8.20871	0.941177	89	10.3037	0.874208	89	12.1712
P62820	Ras-related protein Rab-1A	RAB1A	Ras-related protein Rab-1A OS=Homo sapiens OX=9606 GN=RAB1A PE=1 SV=3 - [RAB1A_HUMAN]	80.98	7	15	66	205	22.6634	6.21436	0.938082	21	6.72355	0.892192	21	3.79277	0.904058	21	6.24365	1.13992	21	5.38355	1.04806	21	10.5469	1.06587	21	7.34679
P55060	Exportin-2	CSE1L	Exportin-2 OS=Homo sapiens OX=9606 GN=CSE1L PE=1 SV=3 - [XPO2_HUMAN]	34.09	31	31	68	971	110.346	5.77002	1.02366	66	7.49383	1.05259	66	5.4559	1.08847	66	7.89386	0.890118	67	10.6767	0.947927	66	7.16942	1.01752	66	6.36888
P20700	Lamin-B1	LMNB1	Lamin-B1 OS=Homo sapiens OX=9606 GN=LMNB1 PE=1 SV=2 - [LMNB1_HUMAN]	52.05	25	30	91	586	66.3676	5.16064	1.08224	76	6.78881	1.02829	76	5.06932	1.04065	76	4.69242	1.00001	76	6.22689	0.954044	76	7.12832	0.943993	76	9.02733
O00159	Unconventional myosin-Ic	MYO1C	Unconventional myosin-Ic OS=Homo sapiens OX=9606 GN=MYO1C PE=1 SV=4 - [MYO1C_HUMAN]	41.77	41	42	81	1063	121.606	9.40771	0.999687	80	7.44987	0.98258	80	4.39757	1.00142	80	5.67301	1.0497	80	7.30222	0.999374	80	5.25102	0.976986	80	5.47122
P15121	Aldo-keto reductase family 1 member B1	AKR1B1	Aldo-keto reductase family 1 member B1 OS=Homo sapiens OX=9606 GN=AKR1B1 PE=1 SV=3 - [ALDR_HUMAN]	77.53	17	19	96	316	35.8305	6.97607	1.0472	88	11.73	0.989568	88	6.36531	1.01386	88	7.98872	0.866585	88	11.3684	0.958197	88	10.328	1.0666	88	9.4413
P11586	C-1-tetrahydrofolate synthase, cytoplasmic	MTHFD1	C-1-tetrahydrofolate synthase, cytoplasmic OS=Homo sapiens OX=9606 GN=MTHFD1 PE=1 SV=3 - [C1TC_HUMAN]	53.26	41	42	93	935	101.495	7.29834	1.05091	92	6.33413	1.04339	92	4.50083	1.09293	92	6.0465	0.90181	92	8.57454	0.972822	92	8.32383	0.976258	92	5.19792
O43390	Heterogeneous nuclear ribonucleoprotein R	HNRNPR	Heterogeneous nuclear ribonucleoprotein R OS=Homo sapiens OX=9606 GN=HNRNPR PE=1 SV=1 - [HNRPR_HUMAN]	45.97	22	31	93	633	70.8993	8.1333	1.0606	61	10.5168	1.02814	61	3.57772	1.06273	61	4.48523	0.998688	61	5.7711	0.96048	61	8.05737	0.937608	61	7.42717
P07951	Tropomyosin beta chain	TPM2	Tropomyosin beta chain OS=Homo sapiens OX=9606 GN=TPM2 PE=1 SV=1 - [TPM2_HUMAN]	65.14	7	25	134	284	32.8306	4.70361	0.938163	19	11.7393	1.04268	19	5.07057	1.01624	19	4.4391	0.959543	19	7.43592	1.04974	19	7.58858	0.98503	19	2.2507
P14866	Heterogeneous nuclear ribonucleoprotein L	HNRNPL	Heterogeneous nuclear ribonucleoprotein L OS=Homo sapiens OX=9606 GN=HNRNPL PE=1 SV=2 - [HNRPL_HUMAN]	46.18	18	19	58	589	64.0924	8.22119	1.00861	52	5.34341	0.991416	52	3.94069	1.00254	52	6.44986	1.05081	52	5.8572	0.974991	52	9.15911	1.00114	52	6.41436
Q96AE4	Far upstream element-binding protein 1	FUBP1	Far upstream element-binding protein 1 OS=Homo sapiens OX=9606 GN=FUBP1 PE=1 SV=3 - [FUBP1_HUMAN]	57.45	23	27	74	644	67.5185	7.60596	0.97604	64	8.4272	0.985751	64	5.30728	0.991622	64	4.85999	1.01889	64	6.54027	1.0209	64	5.93184	1.01121	64	4.64233
Q14533	Keratin, type II cuticular Hb1	KRT81	Keratin, type II cuticular Hb1 OS=Homo sapiens OX=9606 GN=KRT81 PE=1 SV=3 - [KRT81_HUMAN]	27.52	14	15	104	505	54.8928	5.46533	0.996935	69	6.59131	0.98349	69	5.53409	1.01346	69	5.80541	0.857101	69	9.54855	1.04962	69	5.64191	1.08947	69	6.51522
Q14914	Prostaglandin reductase 1	PTGR1	Prostaglandin reductase 1 OS=Homo sapiens OX=9606 GN=PTGR1 PE=1 SV=2 - [PTGR1_HUMAN]	55.02	16	16	70	329	35.8467	8.29443	1.106	70	16.889	1.05177	70	7.52784	1.10098	70	6.27497	0.866485	70	8.25122	0.934355	70	24.0776	0.966224	70	9.22578
P80723	Brain acid soluble protein 1	BASP1	Brain acid soluble protein 1 OS=Homo sapiens OX=9606 GN=BASP1 PE=1 SV=2 - [BASP1_HUMAN]	83.7	16	16	76	227	22.68	4.62744	1.06046	75	8.26748	0.97102	75	4.73681	0.950841	75	4.97108	1.0984	75	7.30101	1.0043	75	9.6331	0.951487	75	5.53381
P30084	Enoyl-CoA hydratase, mitochondrial	ECHS1	Enoyl-CoA hydratase, mitochondrial OS=Homo sapiens OX=9606 GN=ECHS1 PE=1 SV=4 - [ECHM_HUMAN]	55.52	16	16	51	290	31.3671	8.07471	0.951251	51	6.66234	0.873709	51	5.83673	0.873925	51	6.28528	1.22446	51	8.60335	1.06714	51	6.69782	0.992278	51	6.71131
Q9UPN3	Microtubule-actin cross-linking factor 1, isoforms 1/2/3/5	MACF1	Microtubule-actin cross-linking factor 1, isoforms 1/2/3/5 OS=Homo sapiens OX=9606 GN=MACF1 PE=1 SV=4 - [MACF1_HUMAN]	11.53	73	78	104	7388	837.787	5.38916	0.971057	95	7.93327	1.02708	95	7.50882	1.02712	95	4.91754	0.978298	95	6.02813	1.01572	95	6.0014	1.00224	95	5.35836
P04792	Heat shock protein beta-1	HSPB1	Heat shock protein beta-1 OS=Homo sapiens OX=9606 GN=HSPB1 PE=1 SV=2 - [HSPB1_HUMAN]	69.76	13	13	72	205	22.7685	6.40479	0.96116	72	8.38609	1.10811	72	6.30318	1.09577	72	9.1587	0.787985	72	17.2699	1.02123	72	7.27991	1.04442	72	5.08253
P05455	Lupus La protein	SSB	Lupus La protein OS=Homo sapiens OX=9606 GN=SSB PE=1 SV=2 - [LA_HUMAN]	58.82	29	30	98	408	46.8082	7.12256	1.03375	97	11.9925	0.968034	97	6.23057	0.990366	97	6.75027	0.997651	97	6.94169	1.03076	97	11.4312	0.994334	97	8.37186
Q07021	Complement component 1 Q subcomponent-binding protein, mitochondrial	C1QBP	Complement component 1 Q subcomponent-binding protein, mitochondrial OS=Homo sapiens OX=9606 GN=C1QBP PE=1 SV=1 - [C1QBP_HUMAN]	31.56	6	6	34	282	31.3426	4.84326	0.98993	34	7.01457	0.889941	34	6.39942	0.916993	34	11.4189	1.23405	34	8.03435	1.04996	34	9.44712	0.945789	34	4.76107
Q99798	Aconitate hydratase, mitochondrial	ACO2	Aconitate hydratase, mitochondrial OS=Homo sapiens OX=9606 GN=ACO2 PE=1 SV=2 - [ACON_HUMAN]	43.46	26	26	55	780	85.3719	7.60596	1.00477	55	8.96358	0.879377	55	5.86107	0.932743	55	8.24086	1.24354	55	10.2751	0.994771	55	9.29933	0.981533	55	7.44262
Q14651	Plastin-1	PLS1	Plastin-1 OS=Homo sapiens OX=9606 GN=PLS1 PE=1 SV=2 - [PLSI_HUMAN]	37.68	13	18	53	629	70.2093	5.41455	1.05271	31	10.0158	1.05887	31	7.47377	1.01649	31	4.92434	1.04865	31	10.4855	0.932091	31	12.5137	0.933059	31	6.39622
Q9NR30	Nucleolar RNA helicase 2	DDX21	Nucleolar RNA helicase 2 OS=Homo sapiens OX=9606 GN=DDX21 PE=1 SV=5 - [DDX21_HUMAN]	42.02	28	29	73	783	87.2904	9.27588	0.890013	72	12.696	0.949573	72	9.07577	0.953049	72	4.65392	1.02358	72	8.54393	1.08129	72	6.7037	1.08019	72	6.83101
Q9BQG0	Myb-binding protein 1A	MYBBP1A	Myb-binding protein 1A OS=Homo sapiens OX=9606 GN=MYBBP1A PE=1 SV=2 - [MBB1A_HUMAN]	32.15	39	40	77	1328	148.762	9.27588	0.951022	75	8.14865	0.956192	75	8.0544	0.95468	75	6.49504	1.0829	75	9.64077	1.05935	75	7.09163	1.0053	75	6.92582
P04843	Dolichyl-diphosphooligosaccharide--protein glycosyltransferase subunit 1	RPN1	Dolichyl-diphosphooligosaccharide--protein glycosyltransferase subunit 1 OS=Homo sapiens OX=9606 GN=RPN1 PE=1 SV=1 - [RPN1_HUMAN]	43.82	25	25	84	607	68.5268	6.37939	1.02519	84	6.21765	0.977265	84	6.00548	0.969393	84	3.55573	1.11848	84	7.62817	0.981064	84	5.35349	0.953862	84	5.65654
O75083	WD repeat-containing protein 1	WDR1	WD repeat-containing protein 1 OS=Homo sapiens OX=9606 GN=WDR1 PE=1 SV=4 - [WDR1_HUMAN]	43.07	24	24	74	606	66.1519	6.65381	0.999141	74	12.9562	1.0323	74	5.95913	1.0684	74	6.95904	0.85487	74	11.0302	1.02189	74	10.5682	1.02438	74	6.71636
P13010	X-ray repair cross-complementing protein 5	XRCC5	X-ray repair cross-complementing protein 5 OS=Homo sapiens OX=9606 GN=XRCC5 PE=1 SV=3 - [XRCC5_HUMAN]	46.58	30	31	69	732	82.6523	5.80811	0.970877	67	16.5691	0.997298	67	6.9017	1.03276	68	5.35649	1.03101	67	8.45146	0.985592	67	11.1837	0.982456	67	10.6028
P49792	E3 SUMO-protein ligase RanBP2	RANBP2	E3 SUMO-protein ligase RanBP2 OS=Homo sapiens OX=9606 GN=RANBP2 PE=1 SV=2 - [RBP2_HUMAN]	23.11	42	64	90	3224	357.974	6.20166	0.998917	57	7.20946	1.04439	57	6.22477	1.04708	57	5.58138	1.02523	57	6.04481	0.948365	57	5.666	0.973738	57	6.67257
P27635	60S ribosomal protein L10	RPL10	60S ribosomal protein L10 OS=Homo sapiens OX=9606 GN=RPL10 PE=1 SV=4 - [RL10_HUMAN]	49.07	10	10	61	214	24.5879	10.0815	1.01909	61	6.75501	1.03935	61	5.21916	1.03256	61	4.69351	1.01717	61	5.85391	0.977429	61	7.4134	0.96632	61	5.59226
O60506	Heterogeneous nuclear ribonucleoprotein Q	SYNCRIP	Heterogeneous nuclear ribonucleoprotein Q OS=Homo sapiens OX=9606 GN=SYNCRIP PE=1 SV=2 - [HNRPQ_HUMAN]	40.29	17	25	80	623	69.5596	8.5874	0.994431	50	5.87883	0.987622	50	4.35568	1.02164	50	5.46863	1.01791	50	3.65716	1.01256	50	9.54901	0.988585	50	6.42645
Q02790	Peptidyl-prolyl cis-trans isomerase FKBP4	FKBP4	Peptidyl-prolyl cis-trans isomerase FKBP4 OS=Homo sapiens OX=9606 GN=FKBP4 PE=1 SV=3 - [FKBP4_HUMAN]	53.81	22	23	78	459	51.7721	5.42725	1.00419	77	6.78224	1.02226	77	5.41216	1.03174	77	4.78212	0.921168	77	7.52444	0.994655	77	6.63055	1.01887	77	7.04905
Q96I99	Succinate--CoA ligase [GDP-forming] subunit beta, mitochondrial	SUCLG2	Succinate--CoA ligase [GDP-forming] subunit beta, mitochondrial OS=Homo sapiens OX=9606 GN=SUCLG2 PE=1 SV=2 - [SUCB2_HUMAN]	43.52	20	21	58	432	46.4814	6.39209	0.965288	55	6.01376	0.907356	55	5.34249	0.91036	55	6.7751	1.21002	55	4.25749	1.02973	55	6.18347	0.986129	55	5.00869
Q9Y678	Coatomer subunit gamma-1	COPG1	Coatomer subunit gamma-1 OS=Homo sapiens OX=9606 GN=COPG1 PE=1 SV=1 - [COPG1_HUMAN]	33.52	21	25	56	874	97.6555	5.46533	0.94623	50	7.64019	0.977863	50	5.69812	0.987383	50	4.2773	0.985807	50	6.97645	1.04672	50	7.36362	1.04188	50	5.80422
Q9NQC3	Reticulon-4	RTN4	Reticulon-4 OS=Homo sapiens OX=9606 GN=RTN4 PE=1 SV=2 - [RTN4_HUMAN]	20.3	12	12	57	1192	129.851	4.50049	0.92828	57	5.49001	0.891538	57	9.613	0.891172	57	7.34773	1.15938	57	12.7641	1.07906	57	7.11343	1.02496	57	4.55283
O95831	Apoptosis-inducing factor 1, mitochondrial	AIFM1	Apoptosis-inducing factor 1, mitochondrial OS=Homo sapiens OX=9606 GN=AIFM1 PE=1 SV=1 - [AIFM1_HUMAN]	35.73	19	19	54	613	66.8589	8.95361	0.960169	54	8.82278	0.905286	54	8.96809	0.932049	54	5.68002	1.16465	54	10.4063	1.04142	54	7.86148	0.985469	54	5.33634
P46777	60S ribosomal protein L5	RPL5	60S ribosomal protein L5 OS=Homo sapiens OX=9606 GN=RPL5 PE=1 SV=3 - [RL5_HUMAN]	56.23	16	16	87	297	34.3407	9.71533	1.0103	86	11.9807	1.01598	86	5.96221	1.04339	86	5.71643	0.993947	86	9.33452	0.969703	86	9.74428	0.96631	86	9.49867
P53621	Coatomer subunit alpha	COPA	Coatomer subunit alpha OS=Homo sapiens OX=9606 GN=COPA PE=1 SV=2 - [COPA_HUMAN]	34.48	40	40	76	1224	138.258	7.66455	0.960462	76	9.06856	0.979224	76	6.73329	1.00711	76	4.88871	0.988958	76	5.94067	1.02438	76	7.83182	1.04026	76	6.79077
P43490	Nicotinamide phosphoribosyltransferase	NAMPT	Nicotinamide phosphoribosyltransferase OS=Homo sapiens OX=9606 GN=NAMPT PE=1 SV=1 - [NAMPT_HUMAN]	51.73	25	25	74	491	55.4866	7.15186	0.990138	74	7.15559	0.920472	74	6.40035	0.95446	74	5.56918	1.02151	74	5.62968	1.01841	74	8.88261	1.07292	74	5.72322
P31947	14-3-3 protein sigma	SFN	14-3-3 protein sigma OS=Homo sapiens OX=9606 GN=SFN PE=1 SV=1 - [1433S_HUMAN]	69.76	12	16	82	248	27.7567	4.7417	0.86231	42	9.05354	0.89447	42	7.40438	0.884762	42	7.97529	0.967568	42	6.5731	1.1292	42	8.79912	1.14295	42	7.97998
O75874	Isocitrate dehydrogenase [NADP] cytoplasmic	IDH1	Isocitrate dehydrogenase [NADP] cytoplasmic OS=Homo sapiens OX=9606 GN=IDH1 PE=1 SV=2 - [IDHC_HUMAN]	52.9	21	23	79	414	46.6295	7.00537	1.0166	73	7.64251	0.937733	73	4.4445	1.00069	73	4.35828	0.990087	73	8.01883	0.999552	73	6.69386	1.04844	73	6.1027
P29692	Elongation factor 1-delta	EEF1D	Elongation factor 1-delta OS=Homo sapiens OX=9606 GN=EEF1D PE=1 SV=5 - [EF1D_HUMAN]	64.06	12	15	50	281	31.1028	5.0083	1.0053	41	5.16515	0.989413	41	4.64689	0.998427	41	4.65927	1.00142	41	6.69845	1.0076	41	7.6713	0.987103	41	5.77394
P07205	Phosphoglycerate kinase 2	PGK2	Phosphoglycerate kinase 2 OS=Homo sapiens OX=9606 GN=PGK2 PE=1 SV=3 - [PGK2_HUMAN]	15.11	2	7	62	417	44.7673	8.54346	1.03473	7	2.98738	1.05466	7	3.16981	1.05142	7	1.86566	0.882437	7	5.40529	1.02338	7	2.58508	0.985335	7	4.1051
Q01518	Adenylyl cyclase-associated protein 1	CAP1	Adenylyl cyclase-associated protein 1 OS=Homo sapiens OX=9606 GN=CAP1 PE=1 SV=5 - [CAP1_HUMAN]	46.11	20	22	86	475	51.8687	8.06006	1.00586	78	5.99334	0.998855	78	5.14799	1.03542	78	5.43792	0.907819	78	8.66509	1.00461	78	7.22931	1.03734	78	7.19053
P35998	26S proteasome regulatory subunit 7	PSMC2	26S proteasome regulatory subunit 7 OS=Homo sapiens OX=9606 GN=PSMC2 PE=1 SV=3 - [PRS7_HUMAN]	69.28	27	27	63	433	48.6031	5.94775	0.971265	63	8.07988	1.00827	63	7.76019	1.01889	63	4.13758	0.951167	63	4.89643	1.02749	63	6.57785	1.0274	63	5.31025
Q9Y265	RuvB-like 1	RUVBL1	RuvB-like 1 OS=Homo sapiens OX=9606 GN=RUVBL1 PE=1 SV=1 - [RUVB1_HUMAN]	47.15	17	17	50	456	50.1963	6.41748	1.02268	50	7.5321	1.01941	50	4.91231	1.05112	50	4.83118	0.937052	50	7.61957	0.998345	50	5.94533	0.98386	50	5.63494
P13489	Ribonuclease inhibitor	RNH1	Ribonuclease inhibitor OS=Homo sapiens OX=9606 GN=RNH1 PE=1 SV=2 - [RINI_HUMAN]	56.62	20	20	50	461	49.9411	4.81787	1.01523	47	5.0469	1.01708	47	7.26158	1.04892	47	9.22553	0.898325	47	10.4816	1.00919	47	5.11354	1.0262	47	7.35264
P33176	Kinesin-1 heavy chain	KIF5B	Kinesin-1 heavy chain OS=Homo sapiens OX=9606 GN=KIF5B PE=1 SV=1 - [KINH_HUMAN]	42.06	39	39	68	963	109.617	6.50732	1.00359	68	6.96162	1.01038	68	7.20766	1.03429	68	5.59675	0.953731	68	8.40092	1.00939	68	6.89899	1.00979	68	7.36882
Q9Y2X3	Nucleolar protein 58	NOP58	Nucleolar protein 58 OS=Homo sapiens OX=9606 GN=NOP58 PE=1 SV=1 - [NOP58_HUMAN]	42.16	17	17	50	529	59.5405	8.92432	0.988232	50	9.25022	0.928373	50	8.73173	0.934673	50	4.75623	1.1642	50	6.9057	0.990186	50	5.79612	0.995584	50	5.79597
P52597	Heterogeneous nuclear ribonucleoprotein F	HNRNPF	Heterogeneous nuclear ribonucleoprotein F OS=Homo sapiens OX=9606 GN=HNRNPF PE=1 SV=3 - [HNRPF_HUMAN]	41.2	11	14	58	415	45.6429	5.57959	1.01101	44	6.11953	1.02282	44	4.76792	1.0175	44	3.63646	0.977469	44	4.79007	1.00725	44	5.9019	0.981445	44	4.66636
P09874	Poly [ADP-ribose] polymerase 1	PARP1	Poly [ADP-ribose] polymerase 1 OS=Homo sapiens OX=9606 GN=PARP1 PE=1 SV=4 - [PARP1_HUMAN]	44.77	47	47	99	1014	113.012	8.88037	1.042	99	8.89486	1.02631	99	5.40158	1.04489	99	5.62469	1.00298	99	5.41872	0.971404	99	8.93785	0.956958	99	7.08556
P23526	Adenosylhomocysteinase	AHCY	Adenosylhomocysteinase OS=Homo sapiens OX=9606 GN=AHCY PE=1 SV=4 - [SAHH_HUMAN]	50.93	20	21	83	432	47.6852	6.34131	0.996331	78	6.92588	1.00554	78	5.99159	1.04529	78	5.69208	0.890123	78	10.0162	1.01403	78	6.34273	1.0639	78	5.4995
Q15366	Poly(rC)-binding protein 2	PCBP2	Poly(rC)-binding protein 2 OS=Homo sapiens OX=9606 GN=PCBP2 PE=1 SV=1 - [PCBP2_HUMAN]	40.82	6	12	53	365	38.5556	6.78564	1.01812	16	9.41444	1.06249	16	5.79476	1.08157	16	6.06004	0.877301	16	11.3325	0.974278	16	5.7305	1.00654	16	10.1834
Q07157	Tight junction protein ZO-1	TJP1	Tight junction protein ZO-1 OS=Homo sapiens OX=9606 GN=TJP1 PE=1 SV=3 - [ZO1_HUMAN]	25.17	38	39	74	1748	195.34	6.69775	1.00546	72	7.79612	1.05382	72	5.86689	1.06754	72	5.68804	0.936626	72	6.86187	0.991953	72	6.70323	0.973284	72	6.93479
O76003	Glutaredoxin-3	GLRX3	Glutaredoxin-3 OS=Homo sapiens OX=9606 GN=GLRX3 PE=1 SV=2 - [GLRX3_HUMAN]	28.66	7	7	29	335	37.4082	5.38916	1.00668	21	4.71778	1.03633	21	5.66449	1.06831	21	6.16606	0.85376	21	11.0414	1.02149	21	5.57361	1.03044	21	4.52165
Q32P51	Heterogeneous nuclear ribonucleoprotein A1-like 2	HNRNPA1L2	Heterogeneous nuclear ribonucleoprotein A1-like 2 OS=Homo sapiens OX=9606 GN=HNRNPA1L2 PE=2 SV=2 - [RA1L2_HUMAN]	34.06	1	13	87	320	34.2043	8.99756	1.13844	4	16.7989	0.964359	4	10.5564	1.12488	4	8.63079	0.900702	4	9.81013	1.06835	4	18.5478	0.898558	4	4.994
P36578	60S ribosomal protein L4	RPL4	60S ribosomal protein L4 OS=Homo sapiens OX=9606 GN=RPL4 PE=1 SV=5 - [RL4_HUMAN]	50.12	22	22	63	427	47.6674	11.063	0.969276	63	10.8354	1.01076	63	5.0815	1.04444	63	5.47538	1.02168	63	7.93483	0.992082	63	11.5733	0.978956	63	7.48804
Q13263	Transcription intermediary factor 1-beta	TRIM28	Transcription intermediary factor 1-beta OS=Homo sapiens OX=9606 GN=TRIM28 PE=1 SV=5 - [TIF1B_HUMAN]	43.83	27	27	58	835	88.4934	5.77002	0.988744	58	7.94607	1.04168	58	6.08802	1.07738	58	6.93089	0.930235	58	7.05667	0.992709	58	6.41222	1.00025	58	6.51124
P38117	Electron transfer flavoprotein subunit beta	ETFB	Electron transfer flavoprotein subunit beta OS=Homo sapiens OX=9606 GN=ETFB PE=1 SV=3 - [ETFB_HUMAN]	64.71	18	18	77	255	27.8262	8.104	0.980026	77	7.61135	0.909043	77	8.50184	0.90844	77	9.47261	1.19955	77	12.2693	1.0274	77	7.58447	0.984748	77	6.83548
P50995	Annexin A11	ANXA11	Annexin A11 OS=Homo sapiens OX=9606 GN=ANXA11 PE=1 SV=1 - [ANX11_HUMAN]	33.86	14	15	41	505	54.3551	7.6499	1.08709	38	7.99016	1.09554	38	6.68447	1.1136	38	8.01637	0.875464	38	14.2124	0.947481	38	6.09642	0.965618	38	6.11864
P00390	Glutathione reductase, mitochondrial	GSR	Glutathione reductase, mitochondrial OS=Homo sapiens OX=9606 GN=GSR PE=1 SV=2 - [GSHR_HUMAN]	59.77	23	23	71	522	56.221	8.49951	1.04588	65	8.77467	1.05979	65	6.52107	1.10976	65	9.48421	0.914803	65	9.45918	0.937564	65	10.6943	0.984563	65	6.56319
P60660	Myosin light polypeptide 6	MYL6	Myosin light polypeptide 6 OS=Homo sapiens OX=9606 GN=MYL6 PE=1 SV=2 - [MYL6_HUMAN]	64.24	10	10	52	151	16.9191	4.65283	1.02283	52	6.7937	1.01466	52	3.68663	1.00277	52	5.49563	0.964653	52	5.05803	1.01162	52	5.96744	0.983388	52	4.27024
P07910	Heterogeneous nuclear ribonucleoproteins C1/C2	HNRNPC	Heterogeneous nuclear ribonucleoproteins C1/C2 OS=Homo sapiens OX=9606 GN=HNRNPC PE=1 SV=4 - [HNRPC_HUMAN]	47.39	18	19	80	306	33.6495	5.08447	0.991003	76	8.28786	0.986277	76	3.91762	0.997683	76	4.98264	1.05475	76	7.02948	0.987519	76	12.4312	1.00921	76	7.43638
Q15233	Non-POU domain-containing octamer-binding protein	NONO	Non-POU domain-containing octamer-binding protein OS=Homo sapiens OX=9606 GN=NONO PE=1 SV=4 - [NONO_HUMAN]	47.13	21	24	93	471	54.1973	8.95361	1.00624	81	10.0365	0.987699	81	8.22439	1.0144	81	6.90427	1.01327	81	6.81801	1.01181	81	5.81599	0.981473	81	10.0512
O14975	Very long-chain acyl-CoA synthetase	SLC27A2	Very long-chain acyl-CoA synthetase OS=Homo sapiens OX=9606 GN=SLC27A2 PE=1 SV=2 - [S27A2_HUMAN]	42.74	22	22	53	620	70.2673	8.51416	1.03731	53	7.17445	0.975072	53	6.46645	0.986941	53	5.4949	1.11209	53	7.78445	0.975868	53	5.12834	0.961472	53	8.13047
O75955	Flotillin-1	FLOT1	Flotillin-1 OS=Homo sapiens OX=9606 GN=FLOT1 PE=1 SV=3 - [FLOT1_HUMAN]	51.99	19	19	46	427	47.3256	7.48877	1.0434	45	6.12409	0.985561	45	4.52388	0.983326	45	5.52194	1.08547	45	6.78793	0.963605	45	7.14201	0.940366	45	7.86787
O14980	Exportin-1	XPO1	Exportin-1 OS=Homo sapiens OX=9606 GN=XPO1 PE=1 SV=1 - [XPO1_HUMAN]	29.32	27	27	63	1071	123.306	6.06201	0.936174	63	7.66714	1.03078	63	5.31188	1.03894	63	4.76931	0.932724	63	6.25727	1.00336	63	6.56026	1.05232	63	6.54866
O75533	Splicing factor 3B subunit 1	SF3B1	Splicing factor 3B subunit 1 OS=Homo sapiens OX=9606 GN=SF3B1 PE=1 SV=3 - [SF3B1_HUMAN]	29.68	33	33	70	1304	145.738	7.09326	1.01463	69	7.80192	0.996311	69	6.00517	1.02806	69	5.69646	0.992316	69	7.19864	0.982275	69	5.97217	0.99389	69	6.87671
P11940	Polyadenylate-binding protein 1	PABPC1	Polyadenylate-binding protein 1 OS=Homo sapiens OX=9606 GN=PABPC1 PE=1 SV=2 - [PABP1_HUMAN]	37.74	19	25	66	636	70.6259	9.49561	0.964641	49	10.0952	1.01672	49	5.94024	1.03796	49	7.79986	0.964375	49	5.66644	1.01691	49	9.79287	1.01599	49	6.10389
Q9NYU2	UDP-glucose:glycoprotein glucosyltransferase 1	UGGT1	UDP-glucose:glycoprotein glucosyltransferase 1 OS=Homo sapiens OX=9606 GN=UGGT1 PE=1 SV=3 - [UGGG1_HUMAN]	24.57	34	34	70	1555	177.078	5.63037	1.00879	70	6.35696	0.951994	70	4.53762	0.95704	70	4.34999	1.14533	70	8.54448	0.987181	70	5.85606	0.981489	70	6.40468
P43686	26S proteasome regulatory subunit 6B	PSMC4	26S proteasome regulatory subunit 6B OS=Homo sapiens OX=9606 GN=PSMC4 PE=1 SV=2 - [PRS6B_HUMAN]	53.11	18	19	56	418	47.3365	5.21143	0.993144	53	6.78496	1.01331	53	5.75548	1.03295	53	5.00198	0.941293	53	8.24682	1.0208	53	4.98692	1.00372	53	4.97188
Q9NY33	Dipeptidyl peptidase 3	DPP3	Dipeptidyl peptidase 3 OS=Homo sapiens OX=9606 GN=DPP3 PE=1 SV=2 - [DPP3_HUMAN]	40.71	23	23	41	737	82.5378	5.09717	1.03625	40	7.44488	1.05458	40	5.17607	1.08057	40	5.73711	0.901378	40	9.40661	0.943552	40	6.59418	0.995871	40	7.01145
P35232	Prohibitin	PHB	Prohibitin OS=Homo sapiens OX=9606 GN=PHB PE=1 SV=1 - [PHB_HUMAN]	45.22	13	13	51	272	29.7859	5.75732	0.918736	51	8.01503	0.873419	51	7.62879	0.868011	51	6.85487	1.17433	51	9.68511	1.08492	51	7.73286	1.01841	51	7.31008
P16152	Carbonyl reductase [NADPH] 1	CBR1	Carbonyl reductase [NADPH] 1 OS=Homo sapiens OX=9606 GN=CBR1 PE=1 SV=3 - [CBR1_HUMAN]	81.59	15	19	49	277	30.3559	8.32373	1.05302	37	8.65691	1.03551	37	6.1259	1.05228	37	5.63668	0.883399	37	10.3248	0.970705	37	5.94022	1.01229	37	3.92942
Q9UJZ1	Stomatin-like protein 2, mitochondrial	STOML2	Stomatin-like protein 2, mitochondrial OS=Homo sapiens OX=9606 GN=STOML2 PE=1 SV=1 - [STML2_HUMAN]	59.83	15	15	41	356	38.5102	7.38623	0.997361	41	7.34108	0.942189	41	6.63107	0.931664	41	6.78749	1.11725	41	11.4919	1.04758	41	8.82327	0.997323	41	6.72594
P43243	Matrin-3	MATR3	Matrin-3 OS=Homo sapiens OX=9606 GN=MATR3 PE=1 SV=2 - [MATR3_HUMAN]	43.33	35	35	78	847	94.5648	6.25244	0.971953	77	7.4173	0.997683	77	5.10835	0.997559	77	4.9468	1.03766	77	6.26429	1.01848	77	6.87398	0.983085	77	5.3201
Q7Z6Z7	E3 ubiquitin-protein ligase HUWE1	HUWE1	E3 ubiquitin-protein ligase HUWE1 OS=Homo sapiens OX=9606 GN=HUWE1 PE=1 SV=3 - [HUWE1_HUMAN]	13.33	52	52	74	4374	481.589	5.22412	1.00598	74	9.62504	1.03789	74	6.18141	1.04472	74	6.87132	0.950384	74	6.49105	0.975166	74	7.30045	1.01036	74	7.13217
Q03252	Lamin-B2	LMNB2	Lamin-B2 OS=Homo sapiens OX=9606 GN=LMNB2 PE=1 SV=4 - [LMNB2_HUMAN]	53.55	27	33	81	620	69.9057	5.59229	1.05127	62	6.08044	1.01599	62	6.11308	1.02634	63	4.63597	1.01834	62	8.67016	0.978221	62	6.47934	0.934763	62	5.76053
Q9P0K7	Ankycorbin	RAI14	Ankycorbin OS=Homo sapiens OX=9606 GN=RAI14 PE=1 SV=2 - [RAI14_HUMAN]	40.71	40	40	67	980	109.973	6.21436	0.95961	67	8.64011	0.975652	67	5.37438	0.988679	67	5.679	1.0793	67	7.6076	1.01517	67	6.40643	0.988504	67	5.73608
P42224	Signal transducer and activator of transcription 1-alpha/beta	STAT1	Signal transducer and activator of transcription 1-alpha/beta OS=Homo sapiens OX=9606 GN=STAT1 PE=1 SV=2 - [STAT1_HUMAN]	42.67	30	30	62	750	87.2795	6.04932	0.971862	62	9.38015	1.10842	62	8.71436	1.13683	62	9.10362	0.828032	62	14.5811	0.989523	62	5.25486	0.986461	62	6.93949
O60716	Catenin delta-1	CTNND1	Catenin delta-1 OS=Homo sapiens OX=9606 GN=CTNND1 PE=1 SV=1 - [CTND1_HUMAN]	43.18	34	34	63	968	108.103	6.22705	1.03533	62	8.3796	1.01899	62	6.51289	1.01852	62	5.85317	1.01313	62	6.71695	0.964851	62	5.65472	0.956533	62	6.54514
Q9P2J5	Leucine--tRNA ligase, cytoplasmic	LARS	Leucine--tRNA ligase, cytoplasmic OS=Homo sapiens OX=9606 GN=LARS PE=1 SV=2 - [SYLC_HUMAN]	25	26	26	47	1176	134.379	7.29834	0.976795	47	6.65923	1.02547	47	4.94972	1.04415	47	5.20051	0.997097	47	6.35182	0.985181	47	8.32413	1.00597	47	6.42164
Q14315	Filamin-C	FLNC	Filamin-C OS=Homo sapiens OX=9606 GN=FLNC PE=1 SV=3 - [FLNC_HUMAN]	7.3	1	19	81	2725	290.841	5.97314	0.791975	1		1.25718	1		0.996178	1		0.894078	1		1.07556	1		1.0155	1
Q9NZN4	EH domain-containing protein 2	EHD2	EH domain-containing protein 2 OS=Homo sapiens OX=9606 GN=EHD2 PE=1 SV=2 - [EHD2_HUMAN]	60.41	24	27	56	543	61.1227	6.45557	1.01785	43	10.5598	0.990984	43	5.05276	1.01099	43	6.49235	0.996636	43	4.48439	1.01068	43	6.45072	0.993734	43	6.63616
P30050	60S ribosomal protein L12	RPL12	60S ribosomal protein L12 OS=Homo sapiens OX=9606 GN=RPL12 PE=1 SV=1 - [RL12_HUMAN]	71.52	11	11	45	165	17.8075	9.42236	1.02264	45	9.24606	0.995196	45	8.10827	1.01305	45	8.55305	1.0469	45	7.31834	0.96852	45	10.8258	0.937709	45	11.7874
P62701	40S ribosomal protein S4, X isoform	RPS4X	40S ribosomal protein S4, X isoform OS=Homo sapiens OX=9606 GN=RPS4X PE=1 SV=2 - [RS4X_HUMAN]	60.46	11	17	71	263	29.5791	10.1548	0.996156	38	6.50618	1.01484	38	4.37807	1.01096	38	5.49183	1.03946	38	8.07024	0.962582	38	6.33915	0.99151	38	6.46243
P06756	Integrin alpha-V	ITGAV	Integrin alpha-V OS=Homo sapiens OX=9606 GN=ITGAV PE=1 SV=2 - [ITAV_HUMAN]	29.68	27	27	51	1048	115.964	5.68115	0.963717	51	9.86061	0.992313	51	8.38178	0.990083	51	5.76189	1.03496	51	8.64732	1.02005	51	7.84656	0.992045	51	7.33569
P05141	ADP/ATP translocase 2	SLC25A5	ADP/ATP translocase 2 OS=Homo sapiens OX=9606 GN=SLC25A5 PE=1 SV=7 - [ADT2_HUMAN]	57.38	7	20	79	298	32.8312	9.68604	0.953458	32	10.0685	0.868962	32	9.70957	0.871323	32	8.21235	1.19012	32	7.34339	1.07052	32	7.16241	0.998484	32	4.01323
O60841	Eukaryotic translation initiation factor 5B	EIF5B	Eukaryotic translation initiation factor 5B OS=Homo sapiens OX=9606 GN=EIF5B PE=1 SV=4 - [IF2P_HUMAN]	32.54	40	41	89	1220	138.742	5.49072	0.9971	88	11.4025	0.992179	88	6.76838	1.00846	88	6.46766	0.99226	88	9.25174	0.999524	88	9.50576	1.01637	88	6.30638
P62195	26S proteasome regulatory subunit 8	PSMC5	26S proteasome regulatory subunit 8 OS=Homo sapiens OX=9606 GN=PSMC5 PE=1 SV=1 - [PRS8_HUMAN]	60.34	21	23	57	406	45.5971	7.54736	0.984483	52	7.00704	1.00861	52	5.04085	1.00433	52	6.76491	0.971841	52	7.04931	1.01289	52	9.69894	1.03959	52	5.48449
P02786	Transferrin receptor protein 1	TFRC	Transferrin receptor protein 1 OS=Homo sapiens OX=9606 GN=TFRC PE=1 SV=2 - [TFR1_HUMAN]	38.95	28	28	68	760	84.8179	6.60986	0.992444	67	8.81436	0.962348	68	5.92249	0.972732	68	5.12849	1.03154	68	7.16865	1.03776	68	8.51179	1.02213	68	4.2627
Q7L1Q6	Basic leucine zipper and W2 domain-containing protein 1	BZW1	Basic leucine zipper and W2 domain-containing protein 1 OS=Homo sapiens OX=9606 GN=BZW1 PE=1 SV=1 - [BZW1_HUMAN]	47.02	18	20	61	419	48.0127	5.92236	0.995723	49	10.881	1.04776	49	7.82117	1.06095	49	5.5332	0.903102	49	8.27656	0.985547	49	7.15483	1.00398	49	8.89128
O15438	Canalicular multispecific organic anion transporter 2	ABCC3	Canalicular multispecific organic anion transporter 2 OS=Homo sapiens OX=9606 GN=ABCC3 PE=1 SV=3 - [MRP3_HUMAN]	22.27	26	30	46	1527	169.234	7.1958	0.982036	40	8.06813	1.02227	40	4.96086	1.02979	40	4.94284	1.01211	40	4.92794	0.978013	40	7.14458	0.990872	40	4.86566
P17844	Probable ATP-dependent RNA helicase DDX5	DDX5	Probable ATP-dependent RNA helicase DDX5 OS=Homo sapiens OX=9606 GN=DDX5 PE=1 SV=1 - [DDX5_HUMAN]	37.95	17	25	76	614	69.1047	8.92432	1.00464	40	3.37268	0.989117	40	3.31577	1.01892	40	4.32857	0.957398	40	5.41997	1.04015	40	5.16293	0.996972	40	6.22745
P51858	Hepatoma-derived growth factor	HDGF	Hepatoma-derived growth factor OS=Homo sapiens OX=9606 GN=HDGF PE=1 SV=1 - [HDGF_HUMAN]	67.5	16	17	69	240	26.7719	4.729	1.08864	61	8.23385	1.00823	61	4.16544	1.03227	61	6.21321	1.0132	61	7.10495	0.976443	61	8.16962	0.921829	61	6.50223
P06753	Tropomyosin alpha-3 chain	TPM3	Tropomyosin alpha-3 chain OS=Homo sapiens OX=9606 GN=TPM3 PE=1 SV=2 - [TPM3_HUMAN]	55.44	6	25	125	285	32.9298	4.71631	0.916513	19	14.86	0.973743	19	7.64284	0.963587	19	6.1641	1.03559	19	4.9033	1.11397	19	12.1483	0.963822	19	4.38527
P30041	Peroxiredoxin-6	PRDX6	Peroxiredoxin-6 OS=Homo sapiens OX=9606 GN=PRDX6 PE=1 SV=3 - [PRDX6_HUMAN]	61.16	12	13	51	224	25.0192	6.37939	1.05786	50	8.71065	1.06474	50	5.25597	1.0797	50	4.0152	0.844351	50	8.10105	0.960563	50	6.85064	0.992291	50	7.18283
Q14566	DNA replication licensing factor MCM6	MCM6	DNA replication licensing factor MCM6 OS=Homo sapiens OX=9606 GN=MCM6 PE=1 SV=1 - [MCM6_HUMAN]	38.98	30	30	57	821	92.8312	5.41455	1.16533	53	10.7908	1.20347	53	8.41644	1.20036	53	11.2927	0.759983	53	15.6891	0.875827	53	9.45578	0.866396	53	10.3935
Q9UBT2	SUMO-activating enzyme subunit 2	UBA2	SUMO-activating enzyme subunit 2 OS=Homo sapiens OX=9606 GN=UBA2 PE=1 SV=2 - [SAE2_HUMAN]	39.38	23	23	53	640	71.1792	5.2876	1.0577	52	8.84693	1.03952	52	4.95102	1.08074	52	5.46414	0.959258	52	7.57447	0.957408	52	8.33749	0.961724	52	7.41948
P47897	Glutamine--tRNA ligase	QARS	Glutamine--tRNA ligase OS=Homo sapiens OX=9606 GN=QARS PE=1 SV=1 - [SYQ_HUMAN]	36.77	24	25	47	775	87.7429	7.15186	0.931762	42	10.5739	1.01829	42	7.0608	1.00237	42	8.25956	1.0016	42	5.93232	1.0212	42	9.71424	0.993373	42	7.99042
P09622	Dihydrolipoyl dehydrogenase, mitochondrial	DLD	Dihydrolipoyl dehydrogenase, mitochondrial OS=Homo sapiens OX=9606 GN=DLD PE=1 SV=2 - [DLDH_HUMAN]	42.04	17	17	51	509	54.143	7.85498	0.956164	51	7.44647	0.897482	51	10.3434	0.880368	51	8.56019	1.17574	51	13.9313	1.02945	51	8.00382	1.00531	51	5.74119
Q99623	Prohibitin-2	PHB2	Prohibitin-2 OS=Homo sapiens OX=9606 GN=PHB2 PE=1 SV=2 - [PHB2_HUMAN]	71.24	21	22	64	299	33.2759	9.83252	0.926852	63	10.6139	0.887751	63	7.65824	0.897531	63	5.79654	1.16699	63	7.03209	1.06522	63	6.58304	1.02501	63	6.04358
Q04917	14-3-3 protein eta	YWHAH	14-3-3 protein eta OS=Homo sapiens OX=9606 GN=YWHAH PE=1 SV=4 - [1433F_HUMAN]	67.89	12	16	77	246	28.201	4.84326	0.99827	37	8.02546	1.02204	37	8.9462	1.03405	37	5.07994	0.897865	37	8.53077	0.987376	37	8.74929	1.03724	37	8.70808
P00505	Aspartate aminotransferase, mitochondrial	GOT2	Aspartate aminotransferase, mitochondrial OS=Homo sapiens OX=9606 GN=GOT2 PE=1 SV=3 - [AATM_HUMAN]	42.09	20	20	63	430	47.4873	9.01221	0.929766	63	9.24844	0.91139	63	6.14262	0.898058	63	6.93666	1.18056	63	10.6444	1.03513	63	10.1869	1.04433	63	5.61841
Q9Y230	RuvB-like 2	RUVBL2	RuvB-like 2 OS=Homo sapiens OX=9606 GN=RUVBL2 PE=1 SV=3 - [RUVB2_HUMAN]	49.24	24	24	61	463	51.1246	5.64307	1.03363	60	7.80204	1.02417	60	4.22206	1.05956	60	5.55288	0.939334	60	6.66927	0.982155	60	7.54952	0.98483	60	5.47298
P02538	Keratin, type II cytoskeletal 6A	KRT6A	Keratin, type II cytoskeletal 6A OS=Homo sapiens OX=9606 GN=KRT6A PE=1 SV=3 - [K2C6A_HUMAN]	28.19	4	19	133	564	60.0083	8.00146	0.805593	5	6.23602	0.869064	5	7.09471	1.00817	5	5.20643	1.0147	5	6.06365	1.16083	5	10.1511	1.11968	5	8.91224
Q14008	Cytoskeleton-associated protein 5	CKAP5	Cytoskeleton-associated protein 5 OS=Homo sapiens OX=9606 GN=CKAP5 PE=1 SV=3 - [CKAP5_HUMAN]	23.08	45	46	76	2032	225.352	7.79639	0.998164	73	7.41193	1.04561	73	4.75571	1.05975	73	4.74467	0.960103	73	6.22693	1.00227	73	6.63347	0.964592	73	4.97754
Q9H4A4	Aminopeptidase B	RNPEP	Aminopeptidase B OS=Homo sapiens OX=9606 GN=RNPEP PE=1 SV=2 - [AMPB_HUMAN]	33.85	19	19	53	650	72.5495	5.74463	1.0438	51	7.37405	1.04268	51	5.59136	1.08862	51	6.57764	0.873531	51	8.39659	0.967984	51	6.08652	1.00314	51	7.25416
P60981	Destrin	DSTN	Destrin OS=Homo sapiens OX=9606 GN=DSTN PE=1 SV=3 - [DEST_HUMAN]	77.58	14	15	61	165	18.4935	7.85498	1.00485	52	7.37547	1.07268	52	4.54137	1.08411	52	8.68764	0.794184	52	12.1093	0.940131	52	13.1054	1.07935	52	6.71677
Q9Y4L1	Hypoxia up-regulated protein 1	HYOU1	Hypoxia up-regulated protein 1 OS=Homo sapiens OX=9606 GN=HYOU1 PE=1 SV=1 - [HYOU1_HUMAN]	35.44	33	33	59	999	111.266	5.22412	1.02912	59	8.01121	0.935612	59	6.5284	0.956096	59	5.69086	1.20505	59	9.98435	0.970946	59	5.85943	0.939091	59	7.07351
P06737	Glycogen phosphorylase, liver form	PYGL	Glycogen phosphorylase, liver form OS=Homo sapiens OX=9606 GN=PYGL PE=1 SV=4 - [PYGL_HUMAN]	42.86	29	36	77	847	97.087	7.1665	0.974953	65	6.14198	1.01313	65	3.31592	1.03255	65	4.88198	0.890019	65	7.3067	1.02642	65	6.53077	1.05387	65	4.35191
P31930	Cytochrome b-c1 complex subunit 1, mitochondrial	UQCRC1	Cytochrome b-c1 complex subunit 1, mitochondrial OS=Homo sapiens OX=9606 GN=UQCRC1 PE=1 SV=3 - [QCR1_HUMAN]	41.25	14	15	37	480	52.6124	6.3667	0.927789	36	7.28456	0.921854	36	5.1612	0.923303	36	5.19692	1.10091	36	8.22578	1.04972	36	6.34404	1.02649	36	7.42517
Q14247	Src substrate cortactin	CTTN	Src substrate cortactin OS=Homo sapiens OX=9606 GN=CTTN PE=1 SV=2 - [SRC8_HUMAN]	42.91	23	23	66	550	61.5485	5.40186	0.952601	66	8.6526	0.981009	66	5.02746	0.998466	66	5.1743	0.964573	66	12.3925	1.02193	66	6.86236	1.08613	66	10.8006
P15880	40S ribosomal protein S2	RPS2	40S ribosomal protein S2 OS=Homo sapiens OX=9606 GN=RPS2 PE=1 SV=2 - [RS2_HUMAN]	58.02	18	18	62	293	31.3046	10.2427	1.00737	62	8.90912	1.03028	62	4.32209	1.0508	62	4.11552	0.984894	62	4.5837	0.994146	62	5.06443	0.967819	62	7.12471
P27105	Erythrocyte band 7 integral membrane protein	STOM	Erythrocyte band 7 integral membrane protein OS=Homo sapiens OX=9606 GN=STOM PE=1 SV=3 - [STOM_HUMAN]	50.69	11	11	37	288	31.7107	7.88428	0.968416	36	11.4007	0.890017	36	10.6555	0.891293	36	10.031	1.16428	36	11.8259	1.02663	36	7.89514	1.02978	36	10.5138
P15924	Desmoplakin	DSP	Desmoplakin OS=Homo sapiens OX=9606 GN=DSP PE=1 SV=3 - [DESP_HUMAN]	27.52	85	86	116	2871	331.569	6.81494	1.04838	115	7.68463	1.02359	115	5.6129	1.04661	115	5.78596	0.982756	115	7.3766	0.955562	115	7.33285	0.963879	115	6.94225
P25205	DNA replication licensing factor MCM3	MCM3	DNA replication licensing factor MCM3 OS=Homo sapiens OX=9606 GN=MCM3 PE=1 SV=3 - [MCM3_HUMAN]	37.13	27	27	48	808	90.924	5.77002	1.13036	47	12.4985	1.10774	47	7.88434	1.18529	47	8.54672	0.800209	47	14.7281	0.920532	47	13.2855	0.906687	47	17.141
P08865	40S ribosomal protein SA	RPSA	40S ribosomal protein SA OS=Homo sapiens OX=9606 GN=RPSA PE=1 SV=4 - [RSSA_HUMAN]	48.14	12	13	41	295	32.8334	4.86865	0.990514	40	11.6668	1.03263	40	6.4233	1.05434	40	7.80974	1.01771	40	7.61475	0.961065	40	9.04961	0.978381	40	9.30513
P62424	60S ribosomal protein L7a	RPL7A	60S ribosomal protein L7a OS=Homo sapiens OX=9606 GN=RPL7A PE=1 SV=2 - [RL7A_HUMAN]	44.74	14	15	45	266	29.977	10.6089	0.962937	44	7.21201	1.01089	44	6.37954	0.996225	44	6.45868	1.05177	44	9.5225	0.981466	44	16.9445	1.0179	44	6.8832
P23284	Peptidyl-prolyl cis-trans isomerase B	PPIB	Peptidyl-prolyl cis-trans isomerase B OS=Homo sapiens OX=9606 GN=PPIB PE=1 SV=2 - [PPIB_HUMAN]	61.57	14	15	70	216	23.7275	9.40771	1.0044	66	8.98275	0.912154	66	3.36097	0.927933	66	6.19556	1.16547	66	6.15852	1.02631	66	7.42278	0.969081	66	7.9919
P26640	Valine--tRNA ligase	VARS	Valine--tRNA ligase OS=Homo sapiens OX=9606 GN=VARS PE=1 SV=4 - [SYVC_HUMAN]	29.91	31	31	55	1264	140.387	7.59131	0.989509	55	6.45449	0.991183	55	7.35149	1.02175	55	4.99747	0.987068	55	7.25296	1.00179	55	6.48654	1.00972	55	5.73101
Q9C0C2	182 kDa tankyrase-1-binding protein	TNKS1BP1	182 kDa tankyrase-1-binding protein OS=Homo sapiens OX=9606 GN=TNKS1BP1 PE=1 SV=4 - [TB182_HUMAN]	27.53	38	38	61	1729	181.685	4.85596	0.961454	60	7.35712	0.998722	61	7.13369	1.00616	60	4.61793	0.988511	61	9.6778	1.03399	61	5.76351	1.01585	61	6.66478
P20020	Plasma membrane calcium-transporting ATPase 1	ATP2B1	Plasma membrane calcium-transporting ATPase 1 OS=Homo sapiens OX=9606 GN=ATP2B1 PE=1 SV=4 - [AT2B1_HUMAN]	24.84	16	25	44	1220	134.6	5.90967	1.00108	28	12.2855	0.972157	28	5.90704	1.01254	28	7.11914	1.09664	28	8.14375	0.968893	28	7.27022	0.969119	28	9.80117
Q9H0U4	Ras-related protein Rab-1B	RAB1B	Ras-related protein Rab-1B OS=Homo sapiens OX=9606 GN=RAB1B PE=1 SV=1 - [RAB1B_HUMAN]	60.7	3	11	54	201	22.1572	5.73193	0.951969	9	3.55835	1.01716	9	7.21014	0.976461	9	3.40976	1.08447	9	4.02541	1.03472	9	3.11865	0.999997	9	2.24582
Q02218	2-oxoglutarate dehydrogenase, mitochondrial	OGDH	2-oxoglutarate dehydrogenase, mitochondrial OS=Homo sapiens OX=9606 GN=OGDH PE=1 SV=3 - [ODO1_HUMAN]	34.9	29	29	48	1023	115.861	6.85889	0.946781	46	7.81263	0.880806	46	8.59245	0.90582	46	7.78224	1.18646	46	10.2279	1.04252	46	7.53125	1.02603	46	4.2384
Q14240	Eukaryotic initiation factor 4A-II	EIF4A2	Eukaryotic initiation factor 4A-II OS=Homo sapiens OX=9606 GN=EIF4A2 PE=1 SV=2 - [IF4A2_HUMAN]	46.19	5	18	51	407	46.3728	5.47803	0.971057	6	4.99185	0.942821	6	5.4456	0.987385	6	7.07641	0.936168	6	6.0986	0.997424	6	10.4377	1.09454	6	6.24605
Q99497	Protein/nucleic acid deglycase DJ-1	PARK7	Protein/nucleic acid deglycase DJ-1 OS=Homo sapiens OX=9606 GN=PARK7 PE=1 SV=2 - [PARK7_HUMAN]	53.97	10	10	40	189	19.8785	6.78564	1.09263	40	8.65553	1.06773	40	3.48542	1.06482	40	7.52523	0.90067	40	5.24803	0.967304	40	6.52276	0.962193	40	4.93444
P47756	F-actin-capping protein subunit beta	CAPZB	F-actin-capping protein subunit beta OS=Homo sapiens OX=9606 GN=CAPZB PE=1 SV=4 - [CAPZB_HUMAN]	58.48	16	16	60	277	31.3308	5.59229	1.03346	57	8.25178	1.02479	57	6.72172	1.04418	57	7.44211	0.960831	57	6.4376	0.985058	57	8.97232	0.963526	57	5.36512
Q15293	Reticulocalbin-1	RCN1	Reticulocalbin-1 OS=Homo sapiens OX=9606 GN=RCN1 PE=1 SV=1 - [RCN1_HUMAN]	43.5	12	12	45	331	38.8662	4.99561	0.996237	45	6.43644	0.888699	45	6.18987	0.882818	45	5.72721	1.31842	45	9.84225	0.967185	45	7.53627	0.957283	45	5.06984
P14314	Glucosidase 2 subunit beta	PRKCSH	Glucosidase 2 subunit beta OS=Homo sapiens OX=9606 GN=PRKCSH PE=1 SV=2 - [GLU2B_HUMAN]	34.85	17	17	50	528	59.3878	4.41162	1.05676	50	9.14561	0.990675	50	6.10264	0.995824	50	4.61445	1.08672	50	7.66817	0.983163	50	8.42401	0.928522	50	7.20341
P10599	Thioredoxin	TXN	Thioredoxin OS=Homo sapiens OX=9606 GN=TXN PE=1 SV=3 - [THIO_HUMAN]	62.86	6	6	34	105	11.7297	4.91943	1.09664	34	8.67141	1.0993	34	5.68846	1.14354	34	4.74188	0.80861	34	12.7577	0.885203	34	6.78256	1.02182	34	5.25236
O75367	Core histone macro-H2A.1	H2AFY	Core histone macro-H2A.1 OS=Homo sapiens OX=9606 GN=H2AFY PE=1 SV=4 - [H2AY_HUMAN]	53.76	16	18	50	372	39.5925	9.78857	1.01245	44	10.3557	0.970554	44	4.71154	0.976826	44	6.4654	1.11858	44	8.83743	0.977603	44	10.3634	0.981681	44	8.31274
P22695	Cytochrome b-c1 complex subunit 2, mitochondrial	UQCRC2	Cytochrome b-c1 complex subunit 2, mitochondrial OS=Homo sapiens OX=9606 GN=UQCRC2 PE=1 SV=3 - [QCR2_HUMAN]	47.02	19	19	48	453	48.4129	8.63135	0.940024	48	10.6024	0.912603	48	6.38191	0.924846	48	7.51482	1.05559	48	9.96763	1.10758	48	9.81679	1.02321	48	7.27865
Q14103	Heterogeneous nuclear ribonucleoprotein D0	HNRNPD	Heterogeneous nuclear ribonucleoprotein D0 OS=Homo sapiens OX=9606 GN=HNRNPD PE=1 SV=1 - [HNRPD_HUMAN]	33.8	10	12	44	355	38.4103	7.81104	1.05149	34	6.36738	1.01346	34	4.0135	1.00178	34	6.18793	1.06269	34	8.47195	0.982986	34	8.51216	0.948854	34	7.11028
P20042	Eukaryotic translation initiation factor 2 subunit 2	EIF2S2	Eukaryotic translation initiation factor 2 subunit 2 OS=Homo sapiens OX=9606 GN=EIF2S2 PE=1 SV=2 - [IF2B_HUMAN]	62.46	18	18	49	333	38.3644	5.79541	0.96509	49	7.4992	0.973085	49	6.05978	1.01097	49	7.65308	1.02619	49	7.06797	1.03205	49	8.49579	0.984931	49	6.63168
P16401	Histone H1.5	HIST1H1B	Histone H1.5 OS=Homo sapiens OX=9606 GN=HIST1H1B PE=1 SV=3 - [H15_HUMAN]	42.92	8	13	68	226	22.5665	10.9165	1.13724	28	12.3094	1.07423	28	6.69729	1.08341	28	5.06949	0.92596	28	6.86145	0.905711	28	10.6027	0.903361	28	10.1239
Q9NZI8	Insulin-like growth factor 2 mRNA-binding protein 1	IGF2BP1	Insulin-like growth factor 2 mRNA-binding protein 1 OS=Homo sapiens OX=9606 GN=IGF2BP1 PE=1 SV=2 - [IF2B1_HUMAN]	49.39	26	29	70	577	63.4412	9.20264	0.961953	66	5.91009	0.987829	66	4.89126	1.0054	66	3.96421	0.995702	66	5.473	1.04152	66	5.63108	0.999947	66	5.32304
Q9UBE0	SUMO-activating enzyme subunit 1	SAE1	SUMO-activating enzyme subunit 1 OS=Homo sapiens OX=9606 GN=SAE1 PE=1 SV=1 - [SAE1_HUMAN]	63.01	21	21	53	346	38.4256	5.30029	1.06571	53	7.30386	1.05552	53	4.5519	1.07883	53	5.6014	0.946395	53	6.93659	0.957133	53	6.90404	0.940446	53	5.98303
P51148	Ras-related protein Rab-5C	RAB5C	Ras-related protein Rab-5C OS=Homo sapiens OX=9606 GN=RAB5C PE=1 SV=2 - [RAB5C_HUMAN]	58.8	6	9	27	216	23.4678	8.41162	0.978622	16	6.36091	0.9361	16	3.00538	0.945784	16	6.39734	1.09321	16	6.73203	1.03142	16	5.76352	1.02669	16	5.22514
P54819	Adenylate kinase 2, mitochondrial	AK2	Adenylate kinase 2, mitochondrial OS=Homo sapiens OX=9606 GN=AK2 PE=1 SV=2 - [KAD2_HUMAN]	60.67	15	15	48	239	26.4608	7.81104	1.00298	48	8.08618	0.922486	48	8.84431	0.899869	48	6.29689	1.19395	48	10.6097	1.00802	48	8.22334	0.965863	48	7.47113
P62241	40S ribosomal protein S8	RPS8	40S ribosomal protein S8 OS=Homo sapiens OX=9606 GN=RPS8 PE=1 SV=2 - [RS8_HUMAN]	46.15	9	9	46	208	24.1902	10.3159	1.00011	45	5.86196	1.00984	46	6.46261	1.02568	45	4.41498	0.994061	46	7.25242	0.973086	46	5.80666	1.01232	46	9.95363
P14868	Aspartate--tRNA ligase, cytoplasmic	DARS	Aspartate--tRNA ligase, cytoplasmic OS=Homo sapiens OX=9606 GN=DARS PE=1 SV=2 - [SYDC_HUMAN]	61.08	30	30	78	501	57.1	6.55127	0.960755	77	9.25143	0.992744	77	6.75593	1.01127	77	5.91307	0.9778	77	7.98045	1.0243	77	8.65121	1.03947	77	6.73135
P07099	Epoxide hydrolase 1	EPHX1	Epoxide hydrolase 1 OS=Homo sapiens OX=9606 GN=EPHX1 PE=1 SV=1 - [HYEP_HUMAN]	44.18	21	21	48	455	52.915	7.25439	0.985929	48	6.66496	0.900252	48	5.69785	0.925459	48	8.4313	1.2484	48	12.2038	0.983993	48	8.75934	0.960817	48	6.86481
P04844	Dolichyl-diphosphooligosaccharide--protein glycosyltransferase subunit 2	RPN2	Dolichyl-diphosphooligosaccharide--protein glycosyltransferase subunit 2 OS=Homo sapiens OX=9606 GN=RPN2 PE=1 SV=3 - [RPN2_HUMAN]	39.94	17	17	40	631	69.241	5.69385	0.964008	40	6.83636	0.953756	40	8.58809	0.958026	40	8.36315	1.11251	40	9.53497	0.988862	40	6.96108	1.01747	40	8.45672
Q14980	Nuclear mitotic apparatus protein 1	NUMA1	Nuclear mitotic apparatus protein 1 OS=Homo sapiens OX=9606 GN=NUMA1 PE=1 SV=2 - [NUMA1_HUMAN]	27.71	51	53	83	2115	238.115	5.78271	1.07226	79	7.58938	1.04595	79	7.07164	1.07226	79	8.27608	0.93652	79	11.7146	0.963358	79	7.35015	0.953588	79	10.0968
O43143	Pre-mRNA-splicing factor ATP-dependent RNA helicase DHX15	DHX15	Pre-mRNA-splicing factor ATP-dependent RNA helicase DHX15 OS=Homo sapiens OX=9606 GN=DHX15 PE=1 SV=2 - [DHX15_HUMAN]	34.09	27	27	59	795	90.8752	7.45947	0.992281	59	10.2476	0.985721	59	6.69651	1.02254	59	5.72997	1.00106	59	7.56976	0.984633	59	5.32817	1.00689	59	8.04801
Q96QK1	Vacuolar protein sorting-associated protein 35	VPS35	Vacuolar protein sorting-associated protein 35 OS=Homo sapiens OX=9606 GN=VPS35 PE=1 SV=2 - [VPS35_HUMAN]	34.42	26	26	59	796	91.6489	5.49072	1.01397	59	7.40348	1.03506	59	5.164	1.06195	59	5.47591	0.93697	59	8.70109	0.995387	59	6.96024	0.997323	59	5.73436
O00469	Procollagen-lysine,2-oxoglutarate 5-dioxygenase 2	PLOD2	Procollagen-lysine,2-oxoglutarate 5-dioxygenase 2 OS=Homo sapiens OX=9606 GN=PLOD2 PE=1 SV=2 - [PLOD2_HUMAN]	26.87	19	19	56	737	84.6316	6.7124	0.977686	56	9.82746	0.991374	56	4.78594	1.00797	56	4.83995	0.938709	56	10.6581	1.05729	56	6.32956	1.01647	56	5.02687
P22234	Multifunctional protein ADE2	PAICS	Multifunctional protein ADE2 OS=Homo sapiens OX=9606 GN=PAICS PE=1 SV=3 - [PUR6_HUMAN]	50.82	22	22	59	425	47.0491	7.2251	0.968463	59	8.42769	1.03212	59	5.34201	1.07701	59	6.1534	0.908028	59	7.81942	1.00965	59	6.79501	1.02624	59	4.73101
P51648	Fatty aldehyde dehydrogenase	ALDH3A2	Fatty aldehyde dehydrogenase OS=Homo sapiens OX=9606 GN=ALDH3A2 PE=1 SV=1 - [AL3A2_HUMAN]	33.81	17	18	63	485	54.8129	7.88428	1.03114	58	6.13288	0.922924	58	6.56594	0.952248	58	6.06252	1.18875	58	8.1747	0.994863	58	5.65574	0.934464	58	7.22743
Q92499	ATP-dependent RNA helicase DDX1	DDX1	ATP-dependent RNA helicase DDX1 OS=Homo sapiens OX=9606 GN=DDX1 PE=1 SV=2 - [DDX1_HUMAN]	51.22	34	34	59	740	82.3798	7.2251	0.981829	59	6.66555	0.989295	59	3.76438	1.01924	59	6.34005	0.982391	59	7.43227	1.01896	59	7.12631	1.02518	59	8.38088
P48735	Isocitrate dehydrogenase [NADP], mitochondrial	IDH2	Isocitrate dehydrogenase [NADP], mitochondrial OS=Homo sapiens OX=9606 GN=IDH2 PE=1 SV=2 - [IDHP_HUMAN]	50.44	20	22	42	452	50.8769	8.68994	1.04052	36	8.43186	0.95413	36	5.0233	0.961145	36	3.00169	1.12681	36	7.69938	0.994991	36	6.6014	0.969408	36	6.61953
O00410	Importin-5	IPO5	Importin-5 OS=Homo sapiens OX=9606 GN=IPO5 PE=1 SV=4 - [IPO5_HUMAN]	26.07	23	26	43	1097	123.55	4.94482	0.971534	38	9.53657	1.04099	38	4.12576	1.03493	38	10.7174	0.873989	38	10.5285	0.987527	38	8.87574	1.03581	38	4.84902
P61247	40S ribosomal protein S3a	RPS3A	40S ribosomal protein S3a OS=Homo sapiens OX=9606 GN=RPS3A PE=1 SV=2 - [RS3A_HUMAN]	67.42	22	22	99	264	29.9257	9.72998	1.01805	99	8.83536	1.01762	99	4.88181	1.03018	99	5.23634	0.999887	99	7.78111	0.988316	99	6.63091	0.974004	99	7.9471
Q6NZI2	Caveolae-associated protein 1	CAVIN1	Caveolae-associated protein 1 OS=Homo sapiens OX=9606 GN=CAVIN1 PE=1 SV=1 - [CAVN1_HUMAN]	37.18	14	15	51	390	43.4498	5.60498	0.953715	50	6.67422	0.959708	50	6.80334	0.952004	50	6.86284	1.06894	50	6.41471	1.07803	50	6.16041	1.02426	50	5.73496
P35222	Catenin beta-1	CTNNB1	Catenin beta-1 OS=Homo sapiens OX=9606 GN=CTNNB1 PE=1 SV=1 - [CTNB1_HUMAN]	38.92	24	27	47	781	85.4422	5.85889	0.988499	43	7.48985	1.01557	43	4.9965	1.02854	43	6.32835	1.0329	43	9.25361	0.964084	43	7.04792	0.986363	43	9.82953
P04040	Catalase	CAT	Catalase OS=Homo sapiens OX=9606 GN=CAT PE=1 SV=3 - [CATA_HUMAN]	43.26	20	20	53	527	59.7188	7.38623	0.960495	53	5.5994	0.933467	53	8.19556	0.932326	53	5.57125	1.13621	53	10.275	1.01255	53	9.43177	1.0145	53	7.92653
Q9Y6N5	Sulfide:quinone oxidoreductase, mitochondrial	SQOR	Sulfide:quinone oxidoreductase, mitochondrial OS=Homo sapiens OX=9606 GN=SQOR PE=1 SV=1 - [SQOR_HUMAN]	44	23	23	56	450	49.9289	9.11475	0.876541	56	9.3867	0.774752	56	14.0378	0.766247	56	13.7932	1.30187	56	18.1497	1.06576	56	8.68963	1.08259	56	5.32607
P16435	NADPH--cytochrome P450 reductase	POR	NADPH--cytochrome P450 reductase OS=Homo sapiens OX=9606 GN=POR PE=1 SV=2 - [NCPR_HUMAN]	47.56	27	27	61	677	76.6413	5.57959	0.962411	60	9.45003	0.946869	60	5.98189	0.980663	60	5.35614	1.12291	60	10.6245	0.979812	60	6.37929	0.976915	60	7.58308
O00231	26S proteasome non-ATPase regulatory subunit 11	PSMD11	26S proteasome non-ATPase regulatory subunit 11 OS=Homo sapiens OX=9606 GN=PSMD11 PE=1 SV=3 - [PSD11_HUMAN]	53.55	21	21	44	422	47.434	6.48096	0.969596	43	5.62366	1.00857	43	4.02849	1.01906	43	7.35702	0.959166	43	8.94221	1.02529	43	7.29899	1.02204	43	6.80076
Q07955	Serine/arginine-rich splicing factor 1	SRSF1	Serine/arginine-rich splicing factor 1 OS=Homo sapiens OX=9606 GN=SRSF1 PE=1 SV=2 - [SRSF1_HUMAN]	55.24	16	16	53	248	27.7278	10.3599	1.00674	53	13.7943	0.982603	53	6.51585	1.00548	53	6.07433	1.05709	53	6.82034	1.00864	53	11.3146	0.967899	53	6.43781
P04632	Calpain small subunit 1	CAPNS1	Calpain small subunit 1 OS=Homo sapiens OX=9606 GN=CAPNS1 PE=1 SV=1 - [CPNS1_HUMAN]	44.03	8	8	25	268	28.2977	5.19873	0.995425	25	5.03547	0.990106	25	7.54019	1.02323	25	4.75862	0.905214	25	9.50674	1.02231	25	7.95314	1.06204	25	7.85105
Q16719	Kynureninase	KYNU	Kynureninase OS=Homo sapiens OX=9606 GN=KYNU PE=1 SV=1 - [KYNU_HUMAN]	44.09	19	19	61	465	52.3182	7.03467	1.07142	60	9.28122	0.946922	60	5.33358	1.00148	60	5.87134	0.955849	60	5.22757	1.00973	60	6.04063	1.01691	60	5.4412
Q32MZ4	Leucine-rich repeat flightless-interacting protein 1	LRRFIP1	Leucine-rich repeat flightless-interacting protein 1 OS=Homo sapiens OX=9606 GN=LRRFIP1 PE=1 SV=2 - [LRRF1_HUMAN]	34.65	25	27	50	808	89.1987	4.65283	1.01511	44	7.46062	0.994777	44	3.12905	1.0121	44	6.14494	1.02338	44	6.23298	0.993116	44	7.06547	0.989136	44	4.88887
Q9BSJ8	Extended synaptotagmin-1	ESYT1	Extended synaptotagmin-1 OS=Homo sapiens OX=9606 GN=ESYT1 PE=1 SV=1 - [ESYT1_HUMAN]	27.9	25	25	46	1104	122.78	5.8335	0.963238	46	8.18227	0.91936	46	6.45293	0.92792	46	4.60234	1.17138	46	8.82747	1.03233	46	4.19057	0.990562	46	4.41837
Q16643	Drebrin	DBN1	Drebrin OS=Homo sapiens OX=9606 GN=DBN1 PE=1 SV=4 - [DREB_HUMAN]	36.21	16	16	51	649	71.3854	4.44971	0.961852	49	5.52166	0.992874	49	5.26483	1.01051	49	4.63195	1.02927	49	7.1219	1.01467	49	7.00964	0.995296	49	7.90994
P30044	Peroxiredoxin-5, mitochondrial	PRDX5	Peroxiredoxin-5, mitochondrial OS=Homo sapiens OX=9606 GN=PRDX5 PE=1 SV=4 - [PRDX5_HUMAN]	44.86	8	8	25	214	22.0725	8.70459	1.03093	25	6.79268	0.962113	25	5.46013	0.92425	25	7.2293	1.10782	25	4.89171	0.995675	25	6.26438	0.99335	25	2.21209
Q9Y383	Putative RNA-binding protein Luc7-like 2	LUC7L2	Putative RNA-binding protein Luc7-like 2 OS=Homo sapiens OX=9606 GN=LUC7L2 PE=1 SV=2 - [LC7L2_HUMAN]	30.1	5	10	33	392	46.4856	10.0083	1.0667	14	5.65347	1.02463	14	4.78029	1.05062	14	4.09482	0.963854	14	8.40339	0.983713	14	4.0595	0.948583	14	4.69767
Q92896	Golgi apparatus protein 1	GLG1	Golgi apparatus protein 1 OS=Homo sapiens OX=9606 GN=GLG1 PE=1 SV=2 - [GSLG1_HUMAN]	29.01	32	32	60	1179	134.464	6.90283	0.958872	58	6.2389	0.959121	58	5.87074	0.954537	58	6.40409	1.09945	58	8.6035	1.02642	58	5.30326	0.998415	58	5.76887
Q9UBQ7	Glyoxylate reductase/hydroxypyruvate reductase	GRHPR	Glyoxylate reductase/hydroxypyruvate reductase OS=Homo sapiens OX=9606 GN=GRHPR PE=1 SV=1 - [GRHPR_HUMAN]	39.94	11	11	28	328	35.6457	7.38623	0.998606	28	13.2581	0.962355	28	3.53924	0.988693	28	4.73427	1.01832	28	5.1958	1.01402	28	5.85646	1.02611	28	7.64138
Q99714	3-hydroxyacyl-CoA dehydrogenase type-2	HSD17B10	3-hydroxyacyl-CoA dehydrogenase type-2 OS=Homo sapiens OX=9606 GN=HSD17B10 PE=1 SV=3 - [HCD2_HUMAN]	51.34	11	11	33	261	26.9061	7.78174	0.945083	33	7.9308	0.894949	33	7.82849	0.895503	33	7.46648	1.11708	33	6.1104	1.06495	33	8.15531	1.0392	33	8.49913
P49448	Glutamate dehydrogenase 2, mitochondrial	GLUD2	Glutamate dehydrogenase 2, mitochondrial OS=Homo sapiens OX=9606 GN=GLUD2 PE=1 SV=2 - [DHE4_HUMAN]	30.47	1	17	48	558	61.3954	8.45557	0.923155	1		0.838458	1		0.770832	1		1.33042	1		1.03616	1		1.07072	1
P05387	60S acidic ribosomal protein P2	RPLP2	60S acidic ribosomal protein P2 OS=Homo sapiens OX=9606 GN=RPLP2 PE=1 SV=1 - [RLA2_HUMAN]	92.17	8	9	37	115	11.6578	4.53857	1.01962	32	11.5878	1.00325	32	3.14884	0.971614	32	10.9188	1.04634	32	5.69785	0.983586	32	22.0635	0.972516	32	6.90283
O00567	Nucleolar protein 56	NOP56	Nucleolar protein 56 OS=Homo sapiens OX=9606 GN=NOP56 PE=1 SV=4 - [NOP56_HUMAN]	34.85	18	18	47	594	66.0087	9.18799	0.9846	47	8.47235	0.933028	47	6.30081	0.932314	47	4.80348	1.13076	47	9.22376	1.01086	47	7.1534	0.991837	47	5.18443
Q06210	Glutamine--fructose-6-phosphate aminotransferase [isomerizing] 1	GFPT1	Glutamine--fructose-6-phosphate aminotransferase [isomerizing] 1 OS=Homo sapiens OX=9606 GN=GFPT1 PE=1 SV=3 - [GFPT1_HUMAN]	36.19	18	21	59	699	78.7563	7.10791	0.956188	50	5.71452	0.878821	50	9.21843	0.929156	50	6.95023	1.08903	50	8.79218	1.05211	50	4.55613	1.06689	50	5.14415
Q02818	Nucleobindin-1	NUCB1	Nucleobindin-1 OS=Homo sapiens OX=9606 GN=NUCB1 PE=1 SV=4 - [NUCB1_HUMAN]	57.05	23	24	57	461	53.8463	5.24951	1.10235	56	7.32463	1.05368	56	7.71756	1.0456	56	8.07541	0.953425	56	6.78552	0.967069	56	6.94191	0.916598	56	10.3595
P67809	Nuclease-sensitive element-binding protein 1	YBX1	Nuclease-sensitive element-binding protein 1 OS=Homo sapiens OX=9606 GN=YBX1 PE=1 SV=3 - [YBOX1_HUMAN]	30.86	4	7	24	324	35.9027	9.87646	1.05075	13	9.46602	1.06157	13	1.35027	1.07765	13	7.90376	1.02591	13	12.1643	0.934892	13	8.59695	0.956747	13	12.1533
P05388	60S acidic ribosomal protein P0	RPLP0	60S acidic ribosomal protein P0 OS=Homo sapiens OX=9606 GN=RPLP0 PE=1 SV=1 - [RLA0_HUMAN]	56.15	14	14	40	317	34.2518	5.97314	1.00802	40	8.28955	0.986123	40	6.14559	1.02166	40	3.46655	1.03671	40	3.93	1.01201	40	4.8892	0.965482	40	6.85728
Q13162	Peroxiredoxin-4	PRDX4	Peroxiredoxin-4 OS=Homo sapiens OX=9606 GN=PRDX4 PE=1 SV=1 - [PRDX4_HUMAN]	60.15	10	12	41	271	30.5208	6.29053	0.981884	30	7.86636	0.964754	30	5.48552	0.978407	30	5.82571	1.05932	30	9.66904	1.04411	30	9.19361	0.967927	30	5.02258
Q13200	26S proteasome non-ATPase regulatory subunit 2	PSMD2	26S proteasome non-ATPase regulatory subunit 2 OS=Homo sapiens OX=9606 GN=PSMD2 PE=1 SV=3 - [PSMD2_HUMAN]	40.53	32	32	70	908	100.136	5.19873	0.996385	69	10.1615	1.01627	69	5.10211	1.02892	69	5.74403	0.954884	69	6.02646	1.02534	69	7.96642	1.01007	69	7.17088
Q9NX63	MICOS complex subunit MIC19	CHCHD3	MICOS complex subunit MIC19 OS=Homo sapiens OX=9606 GN=CHCHD3 PE=1 SV=1 - [MIC19_HUMAN]	51.54	13	13	42	227	26.1362	8.27979	1.00205	42	6.15381	0.928509	42	4.40248	0.920746	42	6.16454	1.15925	42	8.34335	1.00069	42	5.79398	0.981854	42	6.34114
P05386	60S acidic ribosomal protein P1	RPLP1	60S acidic ribosomal protein P1 OS=Homo sapiens OX=9606 GN=RPLP1 PE=1 SV=1 - [RLA1_HUMAN]	94.74	4	5	19	114	11.5067	4.32275	0.940315	14	4.49052	1.08244	14	10.5258	1.00405	14	4.7435	1.04236	14	5.13723	1.04888	14	7.71426	0.914145	14	5.37526
P20810	Calpastatin	CAST	Calpastatin OS=Homo sapiens OX=9606 GN=CAST PE=1 SV=4 - [ICAL_HUMAN]	58.47	34	34	68	708	76.5263	5.07178	1.14138	68	10.8788	0.970462	68	7.65673	1.01176	68	5.25511	1.08702	68	6.90288	0.909425	68	9.26485	0.918875	68	10.0595
P41091	Eukaryotic translation initiation factor 2 subunit 3	EIF2S3	Eukaryotic translation initiation factor 2 subunit 3 OS=Homo sapiens OX=9606 GN=EIF2S3 PE=1 SV=3 - [IF2G_HUMAN]	49.79	18	18	51	472	51.0772	8.39697	0.917817	46	11.0807	0.940636	46	5.19053	0.98501	46	5.62954	1.01028	46	6.4258	1.03429	46	6.18807	1.07447	46	11.8913
P30043	Flavin reductase (NADPH)	BLVRB	Flavin reductase (NADPH) OS=Homo sapiens OX=9606 GN=BLVRB PE=1 SV=3 - [BLVRB_HUMAN]	62.62	9	9	54	206	22.1054	7.6499	1.0038	54	8.36241	1.02827	54	6.10392	1.03162	54	5.66538	0.948604	54	9.35358	0.924503	54	12.8478	1.04676	54	9.54747
Q93084	Sarcoplasmic/endoplasmic reticulum calcium ATPase 3	ATP2A3	Sarcoplasmic/endoplasmic reticulum calcium ATPase 3 OS=Homo sapiens OX=9606 GN=ATP2A3 PE=1 SV=2 - [AT2A3_HUMAN]	9.01	1	10	35	1043	113.904	5.56689	0.907448	1		0.978772	1		0.912336	1		0.927407	1		0.974443	1		1.24815	1
P19105	Myosin regulatory light chain 12A	MYL12A	Myosin regulatory light chain 12A OS=Homo sapiens OX=9606 GN=MYL12A PE=1 SV=2 - [ML12A_HUMAN]	66.67	10	10	47	171	19.7815	4.80518	0.989006	47	7.19463	1.00023	47	5.34275	0.988137	47	4.82248	0.985357	47	5.0211	0.990302	47	7.1726	0.995257	47	4.449
P55084	Trifunctional enzyme subunit beta, mitochondrial	HADHB	Trifunctional enzyme subunit beta, mitochondrial OS=Homo sapiens OX=9606 GN=HADHB PE=1 SV=3 - [ECHB_HUMAN]	47.05	20	21	66	474	51.2615	9.40771	0.975518	63	7.24202	0.886786	63	7.93029	0.89822	63	5.85839	1.20827	63	9.87732	1.04649	63	6.28304	0.969378	63	4.78621
P35908	Keratin, type II cytoskeletal 2 epidermal	KRT2	Keratin, type II cytoskeletal 2 epidermal OS=Homo sapiens OX=9606 GN=KRT2 PE=1 SV=2 - [K22E_HUMAN]	32.71	12	23	71	639	65.3932	8.00146	0.886674	24	9.13482	0.744675	24	14.1959	0.897388	24	7.3221	1.26544	24	7.68807	1.09727	24	5.95846	1.09495	24	4.89423
P04080	Cystatin-B	CSTB	Cystatin-B OS=Homo sapiens OX=9606 GN=CSTB PE=1 SV=2 - [CYTB_HUMAN]	76.53	5	5	23	98	11.1326	7.56201	1.06364	14	4.87942	1.06935	14	12.4512	1.05129	14	7.90899	0.899865	14	8.44751	0.964763	14	4.19796	0.990079	14	7.37615
Q12905	Interleukin enhancer-binding factor 2	ILF2	Interleukin enhancer-binding factor 2 OS=Homo sapiens OX=9606 GN=ILF2 PE=1 SV=2 - [ILF2_HUMAN]	43.59	13	13	33	390	43.0352	5.26221	0.98468	33	6.79203	0.989361	33	4.11727	1.01161	33	6.21921	1.05688	33	4.13214	1.00503	33	6.48875	0.976649	33	8.14352
Q15029	116 kDa U5 small nuclear ribonucleoprotein component	EFTUD2	116 kDa U5 small nuclear ribonucleoprotein component OS=Homo sapiens OX=9606 GN=EFTUD2 PE=1 SV=1 - [U5S1_HUMAN]	31.79	26	27	54	972	109.366	4.99561	1.02124	50	7.59397	1.01583	50	7.93185	1.04168	50	4.51404	0.951034	50	6.20522	1.00252	50	5.788	0.987012	50	7.20239
P55795	Heterogeneous nuclear ribonucleoprotein H2	HNRNPH2	Heterogeneous nuclear ribonucleoprotein H2 OS=Homo sapiens OX=9606 GN=HNRNPH2 PE=1 SV=1 - [HNRH2_HUMAN]	36.3	5	15	49	449	49.2323	6.30322	1.01993	7	3.11992	1.08018	7	7.46742	1.07702	7	2.3093	0.930873	7	8.10988	1.00981	7	8.70492	0.897469	7	9.22122
P61158	Actin-related protein 3	ACTR3	Actin-related protein 3 OS=Homo sapiens OX=9606 GN=ACTR3 PE=1 SV=3 - [ARP3_HUMAN]	54.07	20	20	57	418	47.341	5.88428	1.02969	57	7.7897	0.991943	57	4.65812	1.01155	57	5.74469	0.971958	57	8.42882	1.001	57	8.25891	0.991178	57	3.66868
Q15181	Inorganic pyrophosphatase	PPA1	Inorganic pyrophosphatase OS=Homo sapiens OX=9606 GN=PPA1 PE=1 SV=2 - [IPYR_HUMAN]	69.55	17	19	56	289	32.6392	5.85889	1.06248	50	6.30144	1.0347	50	4.33705	1.06481	50	5.3695	0.889429	50	7.97234	1.00298	50	7.94379	0.992884	50	4.15459
P09960	Leukotriene A-4 hydrolase	LTA4H	Leukotriene A-4 hydrolase OS=Homo sapiens OX=9606 GN=LTA4H PE=1 SV=2 - [LKHA4_HUMAN]	43.04	24	24	58	611	69.2412	6.17627	1.02283	58	8.81621	1.00949	58	6.26284	1.05022	58	5.02888	0.898253	58	10.0699	0.987617	58	8.35529	1.02058	58	6.60372
P52907	F-actin-capping protein subunit alpha-1	CAPZA1	F-actin-capping protein subunit alpha-1 OS=Homo sapiens OX=9606 GN=CAPZA1 PE=1 SV=3 - [CAZA1_HUMAN]	55.59	9	11	32	286	32.9023	5.69385	0.995336	27	7.87142	1.00349	27	4.00374	1.01409	27	4.46139	0.968784	27	7.77465	1.01942	27	5.80108	0.969411	27	7.55775
P40925	Malate dehydrogenase, cytoplasmic	MDH1	Malate dehydrogenase, cytoplasmic OS=Homo sapiens OX=9606 GN=MDH1 PE=1 SV=4 - [MDHC_HUMAN]	54.79	23	23	73	334	36.403	7.35693	1.03946	73	11.0102	1.03662	73	6.59233	1.08496	73	6.74298	0.876709	73	12.3715	0.949665	73	8.46891	1.00331	73	6.64843
P36776	Lon protease homolog, mitochondrial	LONP1	Lon protease homolog, mitochondrial OS=Homo sapiens OX=9606 GN=LONP1 PE=1 SV=2 - [LONM_HUMAN]	29.41	25	27	53	959	106.422	6.39209	0.960639	50	8.9871	0.888995	50	8.12703	0.893073	50	6.70426	1.1998	50	9.26622	1.02118	50	8.03279	1.01177	50	7.44396
Q15459	Splicing factor 3A subunit 1	SF3A1	Splicing factor 3A subunit 1 OS=Homo sapiens OX=9606 GN=SF3A1 PE=1 SV=1 - [SF3A1_HUMAN]	36.95	26	26	53	793	88.8305	5.22412	0.999075	53	8.8107	1.00039	53	5.30432	1.01633	53	5.91436	1.00541	53	6.91838	1.00656	53	8.18883	0.984503	53	6.43776
Q71DI3	Histone H3.2	HIST2H3A	Histone H3.2 OS=Homo sapiens OX=9606 GN=HIST2H3A PE=1 SV=3 - [H32_HUMAN]	55.15	1	10	84	136	15.3785	11.2681	0.915177	11	5.21075	1.10617	11	9.59998	1.01391	11	7.52742	1.00271	11	7.89138	0.878871	11	6.85056	1.05223	11	1.93876
P17812	CTP synthase 1	CTPS1	CTP synthase 1 OS=Homo sapiens OX=9606 GN=CTPS1 PE=1 SV=2 - [PYRG1_HUMAN]	41.29	20	23	52	591	66.648	6.45557	0.875874	45	11.8463	1.00358	45	6.09256	1.03122	45	6.40692	0.858823	45	11.0211	1.09297	45	9.93744	1.10739	45	8.4112
P11717	Cation-independent mannose-6-phosphate receptor	IGF2R	Cation-independent mannose-6-phosphate receptor OS=Homo sapiens OX=9606 GN=IGF2R PE=1 SV=3 - [MPRI_HUMAN]	17.9	42	42	59	2491	274.199	5.93506	0.979103	58	7.53917	0.97356	58	5.13188	0.982538	58	3.85017	1.04093	58	7.27087	1.02029	58	6.25745	1.02384	58	4.69616
Q99873	Protein arginine N-methyltransferase 1	PRMT1	Protein arginine N-methyltransferase 1 OS=Homo sapiens OX=9606 GN=PRMT1 PE=1 SV=3 - [ANM1_HUMAN]	36.66	15	15	49	371	42.4339	5.35107	1.04999	49	11.7373	1.07365	49	9.05523	1.11437	49	9.58033	0.809616	49	10.4608	0.991528	49	14.1847	0.969897	49	10.1345
P31937	3-hydroxyisobutyrate dehydrogenase, mitochondrial	HIBADH	3-hydroxyisobutyrate dehydrogenase, mitochondrial OS=Homo sapiens OX=9606 GN=HIBADH PE=1 SV=2 - [3HIDH_HUMAN]	31.85	8	8	21	336	35.3058	8.1333	1.02931	21	5.98672	0.903894	21	6.79575	0.904163	21	5.64453	1.29795	21	9.83926	0.983597	21	5.36984	0.881015	21	10.2455
O60664	Perilipin-3	PLIN3	Perilipin-3 OS=Homo sapiens OX=9606 GN=PLIN3 PE=1 SV=3 - [PLIN3_HUMAN]	50.46	18	18	35	434	47.0459	5.43994	0.981916	35	6.67962	0.984821	35	4.89045	0.978152	35	3.79786	0.978348	35	7.01004	1.00166	35	6.42516	1.04773	35	5.90851
P46782	40S ribosomal protein S5	RPS5	40S ribosomal protein S5 OS=Homo sapiens OX=9606 GN=RPS5 PE=1 SV=4 - [RS5_HUMAN]	57.84	12	12	39	204	22.8621	9.71533	1.01814	39	6.9596	1.05146	39	4.85363	1.06324	39	4.15625	1.01101	39	4.94131	0.983105	39	8.57457	0.930346	39	5.72491
Q04637	Eukaryotic translation initiation factor 4 gamma 1	EIF4G1	Eukaryotic translation initiation factor 4 gamma 1 OS=Homo sapiens OX=9606 GN=EIF4G1 PE=1 SV=4 - [IF4G1_HUMAN]	28.52	39	46	88	1599	175.382	5.32568	0.97899	75	9.23451	0.997357	75	3.92619	1.02324	75	6.39489	0.944837	75	7.54009	1.03437	75	7.32723	0.9908	75	6.44164
P62906	60S ribosomal protein L10a	RPL10A	60S ribosomal protein L10a OS=Homo sapiens OX=9606 GN=RPL10A PE=1 SV=2 - [RL10A_HUMAN]	48.85	12	12	39	217	24.8155	9.93506	1.02962	39	6.42246	1.01955	39	4.12157	1.02328	39	5.9592	1.04676	39	5.84962	0.980059	39	9.50642	0.96149	39	7.35425
O00151	PDZ and LIM domain protein 1	PDLIM1	PDZ and LIM domain protein 1 OS=Homo sapiens OX=9606 GN=PDLIM1 PE=1 SV=4 - [PDLI1_HUMAN]	58.97	14	14	43	329	36.049	7.02002	0.98348	42	12.5761	0.981933	42	6.20951	0.98359	42	7.1118	1.0096	42	11.8122	0.993449	42	9.38369	1.02705	42	8.38398
P55209	Nucleosome assembly protein 1-like 1	NAP1L1	Nucleosome assembly protein 1-like 1 OS=Homo sapiens OX=9606 GN=NAP1L1 PE=1 SV=1 - [NP1L1_HUMAN]	23.53	7	8	28	391	45.3459	4.4624	1.00011	20	8.18312	1.04806	20	5.27479	1.07612	20	9.72041	0.885802	20	8.73529	0.913728	20	8.66676	1.07932	20	6.23723
Q9UNZ2	NSFL1 cofactor p47	NSFL1C	NSFL1 cofactor p47 OS=Homo sapiens OX=9606 GN=NSFL1C PE=1 SV=2 - [NSF1C_HUMAN]	57.03	19	19	35	370	40.5483	5.09717	0.976052	34	8.53483	1.01614	34	7.0141	1.02293	34	4.56422	0.93354	34	6.78523	1.01373	34	6.39451	1.02138	34	6.91261
P15531	Nucleoside diphosphate kinase A	NME1	Nucleoside diphosphate kinase A OS=Homo sapiens OX=9606 GN=NME1 PE=1 SV=1 - [NDKA_HUMAN]	57.24	4	8	68	152	17.1377	6.18896	1.01109	27	4.40336	1.03299	27	4.15559	1.03023	27	4.18427	0.880538	27	5.28557	0.963288	27	8.67994	1.06197	27	2.90591
P35637	RNA-binding protein FUS	FUS	RNA-binding protein FUS OS=Homo sapiens OX=9606 GN=FUS PE=1 SV=1 - [FUS_HUMAN]	20.34	8	10	57	526	53.3938	9.36377	0.941563	41	6.89131	0.966175	41	5.63469	1.00813	41	5.21555	1.00786	41	7.26112	1.0534	41	4.91337	1.0342	41	5.4953
P55786	Puromycin-sensitive aminopeptidase	NPEPPS	Puromycin-sensitive aminopeptidase OS=Homo sapiens OX=9606 GN=NPEPPS PE=1 SV=2 - [PSA_HUMAN]	29.92	27	27	59	919	103.211	5.71924	1.03764	59	6.14382	1.01546	59	4.27526	1.06861	59	6.56414	0.911487	59	9.53285	0.98654	59	4.94876	1.01249	59	5.57346
P08133	Annexin A6	ANXA6	Annexin A6 OS=Homo sapiens OX=9606 GN=ANXA6 PE=1 SV=3 - [ANXA6_HUMAN]	45.47	29	29	53	673	75.8256	5.60498	1.01615	53	6.48548	1.05287	53	4.0755	1.08042	53	6.93522	0.843551	53	10.154	0.988603	53	7.95408	1.04252	53	6.22037
P62942	Peptidyl-prolyl cis-trans isomerase FKBP1A	FKBP1A	Peptidyl-prolyl cis-trans isomerase FKBP1A OS=Homo sapiens OX=9606 GN=FKBP1A PE=1 SV=2 - [FKB1A_HUMAN]	41.67	5	5	22	108	11.9431	8.1626	1.10901	22	10.9014	1.04101	22	8.11282	1.05135	22	6.62686	0.823836	22	15.6917	0.947421	22	8.57742	0.957542	22	6.62175
P16989	Y-box-binding protein 3	YBX3	Y-box-binding protein 3 OS=Homo sapiens OX=9606 GN=YBX3 PE=1 SV=4 - [YBOX3_HUMAN]	26.88	4	7	23	372	40.066	9.77393	1.00343	12	8.43682	1.00761	12	4.16576	0.967295	12	7.88216	0.995043	12	11.8235	1.06479	12	6.56844	0.978816	12	7.03288
Q99613	Eukaryotic translation initiation factor 3 subunit C	EIF3C	Eukaryotic translation initiation factor 3 subunit C OS=Homo sapiens OX=9606 GN=EIF3C PE=1 SV=1 - [EIF3C_HUMAN]	33.08	27	27	54	913	105.278	5.68115	0.97791	53	5.64818	1.00357	53	5.98408	1.04856	53	6.89256	0.977922	53	9.29399	1.0148	53	7.36968	1.00667	53	6.57684
P55884	Eukaryotic translation initiation factor 3 subunit B	EIF3B	Eukaryotic translation initiation factor 3 subunit B OS=Homo sapiens OX=9606 GN=EIF3B PE=1 SV=3 - [EIF3B_HUMAN]	25.18	19	19	46	814	92.4238	4.99561	1.0024	46	5.76047	1.03292	46	4.9849	1.07312	46	6.52154	0.943535	46	6.35472	0.996223	46	7.64902	0.99676	46	9.14019
Q16658	Fascin	FSCN1	Fascin OS=Homo sapiens OX=9606 GN=FSCN1 PE=1 SV=3 - [FSCN1_HUMAN]	46.65	20	20	42	493	54.4961	7.23975	0.979611	42	8.82931	0.992848	42	7.43143	1.06639	42	5.72719	0.842071	42	12.5564	1.01162	42	7.1023	1.06132	42	5.28523
P62879	Guanine nucleotide-binding protein G(I)/G(S)/G(T) subunit beta-2	GNB2	Guanine nucleotide-binding protein G(I)/G(S)/G(T) subunit beta-2 OS=Homo sapiens OX=9606 GN=GNB2 PE=1 SV=3 - [GBB2_HUMAN]	38.53	3	12	33	340	37.3071	5.99854	1.04281	8	7.58471	1.00275	8	5.62744	1.01872	8	4.15362	1.0799	8	5.63548	0.895526	8	4.99295	0.999429	8	7.04144
Q8NC51	Plasminogen activator inhibitor 1 RNA-binding protein	SERBP1	Plasminogen activator inhibitor 1 RNA-binding protein OS=Homo sapiens OX=9606 GN=SERBP1 PE=1 SV=2 - [PAIRB_HUMAN]	48.53	20	20	54	408	44.9385	8.646	0.95181	54	11.5993	1.02746	54	5.28243	1.07492	54	6.62044	0.911541	54	15.2744	0.986058	54	7.40019	1.05227	54	9.41943
P62753	40S ribosomal protein S6	RPS6	40S ribosomal protein S6 OS=Homo sapiens OX=9606 GN=RPS6 PE=1 SV=1 - [RS6_HUMAN]	37.75	14	14	49	249	28.663	10.8433	1.00216	49	9.26722	1.03119	49	5.30069	1.02486	49	5.53139	0.995524	49	9.97437	0.979362	49	5.10773	0.97823	49	6.83202
Q9Y5B9	FACT complex subunit SPT16	SUPT16H	FACT complex subunit SPT16 OS=Homo sapiens OX=9606 GN=SUPT16H PE=1 SV=1 - [SP16H_HUMAN]	31.71	33	34	75	1047	119.838	5.65576	1.02401	73	9.7301	1.02276	73	5.53141	1.05804	73	5.68147	0.938057	73	4.83099	0.983196	73	7.76082	0.985626	73	8.34246
P26641	Elongation factor 1-gamma	EEF1G	Elongation factor 1-gamma OS=Homo sapiens OX=9606 GN=EEF1G PE=1 SV=3 - [EF1G_HUMAN]	42.33	22	22	66	437	50.0871	6.66846	0.933133	65	12.8288	0.934625	65	4.79432	0.968517	65	7.00719	1.03577	65	5.13851	1.03297	65	15.4739	1.05324	65	5.64307
Q14152	Eukaryotic translation initiation factor 3 subunit A	EIF3A	Eukaryotic translation initiation factor 3 subunit A OS=Homo sapiens OX=9606 GN=EIF3A PE=1 SV=1 - [EIF3A_HUMAN]	36.76	57	57	104	1382	166.468	6.78564	0.98318	102	8.39054	1.00849	102	4.35144	1.03869	102	4.98751	0.952683	102	6.34296	1.02104	102	7.19055	1.00175	102	7.01941
P49589	Cysteine--tRNA ligase, cytoplasmic	CARS	Cysteine--tRNA ligase, cytoplasmic OS=Homo sapiens OX=9606 GN=CARS PE=1 SV=3 - [SYCC_HUMAN]	39.44	23	23	48	748	85.4192	6.75635	0.962535	48	4.12819	1.00028	48	9.82746	0.991422	48	3.63435	0.976425	48	6.63367	1.02636	48	5.18107	1.04453	48	5.23637
O00764	Pyridoxal kinase	PDXK	Pyridoxal kinase OS=Homo sapiens OX=9606 GN=PDXK PE=1 SV=1 - [PDXK_HUMAN]	49.36	15	15	37	312	35.0799	6.12549	0.973484	37	8.79434	1.17082	37	9.74413	1.1032	37	11.8841	0.776804	37	17.0442	0.990435	37	12.1552	1.02636	37	6.97913
P36957	Dihydrolipoyllysine-residue succinyltransferase component of 2-oxoglutarate dehydrogenase complex, mitochondrial	DLST	Dihydrolipoyllysine-residue succinyltransferase component of 2-oxoglutarate dehydrogenase complex, mitochondrial OS=Homo sapiens OX=9606 GN=DLST PE=1 SV=4 - [ODO2_HUMAN]	31.13	13	13	44	453	48.7245	8.95361	0.950387	44	8.56203	0.92103	44	10.15	0.904893	44	8.63069	1.18662	44	10.1917	1.02754	44	7.47975	1.00953	44	3.02367
P36542	ATP synthase subunit gamma, mitochondrial	ATP5F1C	ATP synthase subunit gamma, mitochondrial OS=Homo sapiens OX=9606 GN=ATP5F1C PE=1 SV=1 - [ATPG_HUMAN]	38.26	11	12	41	298	32.9753	9.21729	0.95559	39	6.93415	0.89016	39	4.6796	0.91526	39	5.46299	1.21135	39	9.26919	0.992084	39	8.24644	1.02969	39	5.78869
Q02543	60S ribosomal protein L18a	RPL18A	60S ribosomal protein L18a OS=Homo sapiens OX=9606 GN=RPL18A PE=1 SV=2 - [RL18A_HUMAN]	51.7	11	11	50	176	20.7489	10.7114	0.979178	50	9.50708	1.01594	50	6.66406	1.0186	50	8.44582	1.00605	50	6.5385	1.04183	50	9.17546	0.969661	50	5.27708
P08134	Rho-related GTP-binding protein RhoC	RHOC	Rho-related GTP-binding protein RhoC OS=Homo sapiens OX=9606 GN=RHOC PE=1 SV=1 - [RHOC_HUMAN]	47.67	3	7	30	193	21.9923	6.58057	1.02476	4	4.55526	1.05755	4	2.30205	1.0993	4	2.32779	0.916514	4	5.57667	0.964688	4	0.632486	0.954143	4	0.457887
Q6ZMR3	L-lactate dehydrogenase A-like 6A	LDHAL6A	L-lactate dehydrogenase A-like 6A OS=Homo sapiens OX=9606 GN=LDHAL6A PE=2 SV=1 - [LDH6A_HUMAN]	5.42	1	2	22	332	36.4842	6.99072	0.991325	2	4.98498	1.04386	2	3.58851	1.00645	2	1.48257	0.804046	2	3.52699	1.13714	2	3.93411	1.03591	2	1.86881
P62136	Serine/threonine-protein phosphatase PP1-alpha catalytic subunit	PPP1CA	Serine/threonine-protein phosphatase PP1-alpha catalytic subunit OS=Homo sapiens OX=9606 GN=PPP1CA PE=1 SV=1 - [PP1A_HUMAN]	44.85	3	12	38	330	37.4878	6.32861	1.02723	6	3.93634	1.03617	6	1.32961	1.02982	6	8.96081	1.00341	6	3.23249	1.01485	6	2.92328	1.02107	6	3.47159
O95573	Long-chain-fatty-acid--CoA ligase 3	ACSL3	Long-chain-fatty-acid--CoA ligase 3 OS=Homo sapiens OX=9606 GN=ACSL3 PE=1 SV=3 - [ACSL3_HUMAN]	43.47	22	24	41	720	80.3683	8.38232	0.83651	39	13.4538	0.818369	39	9.86606	0.839011	39	9.46669	1.24112	39	12.0936	1.12202	39	13.0472	1.11682	39	4.94225
P51149	Ras-related protein Rab-7a	RAB7A	Ras-related protein Rab-7a OS=Homo sapiens OX=9606 GN=RAB7A PE=1 SV=1 - [RAB7A_HUMAN]	76.81	16	16	33	207	23.4748	6.69775	0.919794	33	8.50441	0.902193	33	6.21792	0.888988	33	5.6228	1.1596	33	11.3578	1.03531	33	12.8068	1.04718	33	6.98643
P48163	NADP-dependent malic enzyme	ME1	NADP-dependent malic enzyme OS=Homo sapiens OX=9606 GN=ME1 PE=1 SV=1 - [MAOX_HUMAN]	44.06	21	21	40	572	64.1091	6.12549	1.01784	40	6.13877	1.03289	40	5.8751	1.07324	40	5.3686	0.858674	40	8.78606	0.996806	40	4.7745	1.01901	40	4.12535
P39019	40S ribosomal protein S19	RPS19	40S ribosomal protein S19 OS=Homo sapiens OX=9606 GN=RPS19 PE=1 SV=2 - [RS19_HUMAN]	48.97	9	9	39	145	16.0505	10.3159	1.07311	39	6.46494	1.0371	39	3.40735	1.0475	39	4.76233	1.00449	39	6.56675	0.932557	39	6.19553	0.927709	39	5.25486
Q9HAW7	UDP-glucuronosyltransferase 1-7	UGT1A7	UDP-glucuronosyltransferase 1-7 OS=Homo sapiens OX=9606 GN=UGT1A7 PE=1 SV=2 - [UD17_HUMAN]	28.68	5	13	32	530	59.7794	7.78174	0.91985	12	4.18339	0.925477	12	6.62503	0.918136	12	4.75334	1.19218	12	9.63016	1.0635	12	2.90489	1.05423	12	9.01538
P31942	Heterogeneous nuclear ribonucleoprotein H3	HNRNPH3	Heterogeneous nuclear ribonucleoprotein H3 OS=Homo sapiens OX=9606 GN=HNRNPH3 PE=1 SV=2 - [HNRH3_HUMAN]	43.35	12	13	47	346	36.9031	6.87354	0.981408	43	7.04629	0.981583	43	5.81046	0.962379	43	7.65474	1.07136	43	7.18994	1.03212	43	5.31551	1.00266	43	3.63387
Q13838	Spliceosome RNA helicase DDX39B	DDX39B	Spliceosome RNA helicase DDX39B OS=Homo sapiens OX=9606 GN=DDX39B PE=1 SV=1 - [DX39B_HUMAN]	44.39	7	18	51	428	48.9599	5.66846	1.01639	24	11.0304	1.02171	24	5.97988	1.00782	24	9.03971	0.983265	24	5.51531	0.965128	24	6.4227	1.0098	24	10.8744
P62826	GTP-binding nuclear protein Ran	RAN	GTP-binding nuclear protein Ran OS=Homo sapiens OX=9606 GN=RAN PE=1 SV=3 - [RAN_HUMAN]	41.2	9	9	54	216	24.4076	7.48877	1.01358	54	9.18849	1.0247	54	5.40268	1.0511	54	6.80816	0.877502	54	9.86132	0.991519	54	8.52535	1.02459	54	8.03466
O00425	Insulin-like growth factor 2 mRNA-binding protein 3	IGF2BP3	Insulin-like growth factor 2 mRNA-binding protein 3 OS=Homo sapiens OX=9606 GN=IGF2BP3 PE=1 SV=2 - [IF2B3_HUMAN]	44.04	21	27	55	579	63.6656	8.86572	0.954414	45	7.60098	1.01016	45	5.51098	1.03665	45	5.77562	1.00902	45	7.52537	1.01456	45	7.56967	1.00741	45	6.86847
Q99460	26S proteasome non-ATPase regulatory subunit 1	PSMD1	26S proteasome non-ATPase regulatory subunit 1 OS=Homo sapiens OX=9606 GN=PSMD1 PE=1 SV=2 - [PSMD1_HUMAN]	43.55	34	34	56	953	105.769	5.38916	0.962708	56	9.00995	0.991407	56	5.8733	1.0084	56	7.34771	0.979662	56	8.18578	1.00344	56	9.19526	1.0311	56	10.3642
O00429	Dynamin-1-like protein	DNM1L	Dynamin-1-like protein OS=Homo sapiens OX=9606 GN=DNM1L PE=1 SV=2 - [DNM1L_HUMAN]	44.02	27	27	46	736	81.8261	6.81494	1.01624	46	6.56154	1.03169	46	7.33755	1.04595	46	6.43733	0.913971	46	10.0666	0.973681	46	8.53604	1.00976	46	8.12245
P09382	Galectin-1	LGALS1	Galectin-1 OS=Homo sapiens OX=9606 GN=LGALS1 PE=1 SV=2 - [LEG1_HUMAN]	70.37	8	8	47	135	14.7062	5.50342	1.02513	47	6.22284	1.00537	47	5.24881	0.985873	47	4.42276	0.95612	47	5.04751	1.03268	47	5.58803	1.00646	47	4.32543
P30740	Leukocyte elastase inhibitor	SERPINB1	Leukocyte elastase inhibitor OS=Homo sapiens OX=9606 GN=SERPINB1 PE=1 SV=1 - [ILEU_HUMAN]	55.94	20	20	49	379	42.7147	6.27783	1.07929	48	9.98946	1.01482	48	5.33686	1.07511	48	6.27177	0.916247	48	9.55975	0.957034	48	7.74643	0.983489	48	5.32348
P61026	Ras-related protein Rab-10	RAB10	Ras-related protein Rab-10 OS=Homo sapiens OX=9606 GN=RAB10 PE=1 SV=1 - [RAB10_HUMAN]	67.5	11	15	50	200	22.5266	8.38232	0.884362	25	9.79398	0.928577	25	7.37992	0.934732	25	9.37937	1.08975	25	7.70722	1.0385	25	10.3553	1.0545	25	12.7807
Q92804	TATA-binding protein-associated factor 2N	TAF15	TATA-binding protein-associated factor 2N OS=Homo sapiens OX=9606 GN=TAF15 PE=1 SV=1 - [RBP56_HUMAN]	30.07	10	12	38	592	61.7931	8.01611	1.01498	22	8.46651	1.02834	22	5.93486	1.05569	22	7.61699	1.00028	22	8.54011	1.01335	22	6.18811	0.95491	22	9.96194
P61586	Transforming protein RhoA	RHOA	Transforming protein RhoA OS=Homo sapiens OX=9606 GN=RHOA PE=1 SV=1 - [RHOA_HUMAN]	49.74	3	7	34	193	21.7541	6.1001	1.0267	9	4.44893	1.07602	9	3.14413	1.08108	9	5.54357	0.895673	9	2.91722	0.980242	9	4.47714	0.958088	9	4.11491
Q92945	Far upstream element-binding protein 2	KHSRP	Far upstream element-binding protein 2 OS=Homo sapiens OX=9606 GN=KHSRP PE=1 SV=4 - [FUBP2_HUMAN]	39.94	21	24	48	711	73.07	7.29834	1.01791	41	10.9379	1.01118	41	6.35588	1.00704	41	7.66835	1.00244	41	10.0668	0.968206	41	5.56263	0.960888	41	6.73981
Q9H1E3	Nuclear ubiquitous casein and cyclin-dependent kinase substrate 1	NUCKS1	Nuclear ubiquitous casein and cyclin-dependent kinase substrate 1 OS=Homo sapiens OX=9606 GN=NUCKS1 PE=1 SV=1 - [NUCKS_HUMAN]	59.26	11	11	26	243	27.28	5.08447	0.932928	26	19.4311	1.00411	26	12.9766	1.00103	26	14.8307	0.9525	26	17.1368	1.05694	26	9.14905	0.975424	26	14.6174
P31040	Succinate dehydrogenase [ubiquinone] flavoprotein subunit, mitochondrial	SDHA	Succinate dehydrogenase [ubiquinone] flavoprotein subunit, mitochondrial OS=Homo sapiens OX=9606 GN=SDHA PE=1 SV=2 - [SDHA_HUMAN]	39.91	21	21	53	664	72.6453	7.38623	0.98907	53	7.18517	0.909277	53	5.80628	0.923781	53	6.99121	1.14765	53	11.2561	1.01918	53	5.98802	0.988285	53	5.02718
P12004	Proliferating cell nuclear antigen	PCNA	Proliferating cell nuclear antigen OS=Homo sapiens OX=9606 GN=PCNA PE=1 SV=1 - [PCNA_HUMAN]	54.41	13	13	45	261	28.7503	4.69092	1.16969	45	10.1713	1.10958	45	8.57736	1.15161	45	8.97511	0.773294	45	14.5795	0.94552	45	7.8251	0.92713	45	8.45711
Q9Y277	Voltage-dependent anion-selective channel protein 3	VDAC3	Voltage-dependent anion-selective channel protein 3 OS=Homo sapiens OX=9606 GN=VDAC3 PE=1 SV=1 - [VDAC3_HUMAN]	63.25	13	15	36	283	30.6393	8.66064	0.971731	28	9.69476	0.907497	28	7.28411	0.908563	28	6.01835	1.08563	28	10.7563	1.02962	28	7.94199	1.06047	28	10.7343
Q1KMD3	Heterogeneous nuclear ribonucleoprotein U-like protein 2	HNRNPUL2	Heterogeneous nuclear ribonucleoprotein U-like protein 2 OS=Homo sapiens OX=9606 GN=HNRNPUL2 PE=1 SV=1 - [HNRL2_HUMAN]	42.97	30	30	50	747	85.0522	4.90674	1.0321	49	8.48948	1.02253	49	8.37688	1.00423	49	6.67087	1.05093	50	5.132	0.94884	49	9.49491	0.978968	50	8.90979
P31153	S-adenosylmethionine synthase isoform type-2	MAT2A	S-adenosylmethionine synthase isoform type-2 OS=Homo sapiens OX=9606 GN=MAT2A PE=1 SV=1 - [METK2_HUMAN]	46.84	15	15	33	395	43.6333	6.48096	1.09871	33	14.9543	1.08369	33	8.89159	1.1153	33	6.98301	0.890369	33	11.5053	0.885121	33	5.72813	0.937516	33	15.1821
Q9Y3F4	Serine-threonine kinase receptor-associated protein	STRAP	Serine-threonine kinase receptor-associated protein OS=Homo sapiens OX=9606 GN=STRAP PE=1 SV=1 - [STRAP_HUMAN]	50.57	14	14	38	350	38.414	5.12256	1.00233	38	5.74809	0.998288	38	5.21865	1.03963	38	4.103	0.916976	38	7.19253	1.02259	38	6.68968	1.02129	38	4.59887
Q8N1F7	Nuclear pore complex protein Nup93	NUP93	Nuclear pore complex protein Nup93 OS=Homo sapiens OX=9606 GN=NUP93 PE=1 SV=2 - [NUP93_HUMAN]	28.57	23	23	46	819	93.4296	5.71924	1.0483	46	6.8528	1.05477	46	6.0385	1.0517	46	4.40205	0.98711	46	7.1239	0.965753	46	6.87866	0.948219	46	5.44268
P36873	Serine/threonine-protein phosphatase PP1-gamma catalytic subunit	PPP1CC	Serine/threonine-protein phosphatase PP1-gamma catalytic subunit OS=Homo sapiens OX=9606 GN=PPP1CC PE=1 SV=1 - [PP1G_HUMAN]	39.63	1	10	34	323	36.9597	6.53662	1.10011	2	3.70073	1.05594	2	0.822505	1.08045	2	8.86614	1.00207	2	4.6719	0.843162	2	1.31998	0.974695	2	4.19263
Q7L014	Probable ATP-dependent RNA helicase DDX46	DDX46	Probable ATP-dependent RNA helicase DDX46 OS=Homo sapiens OX=9606 GN=DDX46 PE=1 SV=2 - [DDX46_HUMAN]	37.05	36	36	53	1031	117.29	9.29053	1.03209	53	8.30074	1.03439	53	6.48876	1.03262	53	6.29369	0.985705	53	9.54961	0.972423	53	6.50193	0.965939	53	7.36261
O43169	Cytochrome b5 type B	CYB5B	Cytochrome b5 type B OS=Homo sapiens OX=9606 GN=CYB5B PE=1 SV=3 - [CYB5B_HUMAN]	57.33	5	5	20	150	16.6841	4.97021	1.08319	20	2.5889	0.90287	20	10.084	0.926509	20	5.52017	1.25865	20	8.41246	1.00158	20	3.6534	0.889837	20	4.13817
O14745	Na(+)/H(+) exchange regulatory cofactor NHE-RF1	SLC9A3R1	Na(+)/H(+) exchange regulatory cofactor NHE-RF1 OS=Homo sapiens OX=9606 GN=SLC9A3R1 PE=1 SV=4 - [NHRF1_HUMAN]	41.34	15	15	39	358	38.8446	5.77002	1.15461	39	8.37783	1.12775	39	6.34108	1.16024	39	5.75427	0.835788	39	11.8096	0.901873	39	7.444	0.915807	39	4.56102
P24752	Acetyl-CoA acetyltransferase, mitochondrial	ACAT1	Acetyl-CoA acetyltransferase, mitochondrial OS=Homo sapiens OX=9606 GN=ACAT1 PE=1 SV=1 - [THIL_HUMAN]	39.34	16	16	40	427	45.1706	8.85107	0.985526	40	7.90404	0.955873	40	5.13386	0.967613	40	5.92218	1.11567	40	9.63381	1.01204	40	4.58484	0.981808	40	5.43753
O43852	Calumenin	CALU	Calumenin OS=Homo sapiens OX=9606 GN=CALU PE=1 SV=2 - [CALU_HUMAN]	54.6	14	14	52	315	37.0835	4.64014	1.01645	51	6.92424	0.941652	51	5.55231	0.955167	51	5.72392	1.17226	51	9.97615	1.00017	51	9.05849	0.952039	51	6.06024
P49419	Alpha-aminoadipic semialdehyde dehydrogenase	ALDH7A1	Alpha-aminoadipic semialdehyde dehydrogenase OS=Homo sapiens OX=9606 GN=ALDH7A1 PE=1 SV=5 - [AL7A1_HUMAN]	40.82	21	21	42	539	58.4501	7.98682	1.02218	42	10.2206	0.975725	42	3.4656	1.02679	42	3.65277	1.028	42	4.01274	0.978739	42	8.1201	0.9933	42	4.40066
P17858	ATP-dependent 6-phosphofructokinase, liver type	PFKL	ATP-dependent 6-phosphofructokinase, liver type OS=Homo sapiens OX=9606 GN=PFKL PE=1 SV=6 - [PFKAL_HUMAN]	21.67	11	17	28	780	84.9642	7.50342	1.06612	15	5.1448	1.05334	15	4.80075	1.10871	15	7.9969	0.89984	15	9.91278	0.956099	15	5.24587	0.966723	15	2.67293
Q15019	Septin-2	SEPT2	Septin-2 OS=Homo sapiens OX=9606 GN=SEPT2 PE=1 SV=1 - [SEPT2_HUMAN]	55.12	17	17	44	361	41.4613	6.59521	1.00255	43	8.12489	0.978209	43	3.99447	1.00323	43	6.72533	1.04219	43	6.0675	1.03333	43	5.99553	0.983458	43	3.78188
Q9NSD9	Phenylalanine--tRNA ligase beta subunit	FARSB	Phenylalanine--tRNA ligase beta subunit OS=Homo sapiens OX=9606 GN=FARSB PE=1 SV=3 - [SYFB_HUMAN]	49.24	29	29	53	589	66.0735	6.84424	0.967847	52	7.41456	0.971161	52	4.49073	1.00245	52	4.49308	1.01143	52	6.21119	1.03358	52	7.09525	1.01716	52	5.06702
O96008	Mitochondrial import receptor subunit TOM40 homolog	TOMM40	Mitochondrial import receptor subunit TOM40 homolog OS=Homo sapiens OX=9606 GN=TOMM40 PE=1 SV=1 - [TOM40_HUMAN]	36.01	9	9	29	361	37.8691	7.25439	0.937494	29	8.06857	0.894587	29	10.3615	0.908557	29	5.55457	1.11005	29	9.12619	1.05463	29	7.55447	1.0706	29	6.03342
P28074	Proteasome subunit beta type-5	PSMB5	Proteasome subunit beta type-5 OS=Homo sapiens OX=9606 GN=PSMB5 PE=1 SV=3 - [PSB5_HUMAN]	39.92	10	10	32	263	28.4622	6.91748	0.952433	31	14.6567	0.965856	31	11.444	0.975769	31	6.01411	0.958855	31	7.61659	1.05584	31	10.5606	1.02666	31	10.7912
P63010	AP-2 complex subunit beta	AP2B1	AP-2 complex subunit beta OS=Homo sapiens OX=9606 GN=AP2B1 PE=1 SV=1 - [AP2B1_HUMAN]	30.63	14	26	59	937	104.486	5.37646	1.00999	33	6.21313	0.978256	33	5.79613	0.99328	33	5.50164	1.0526	33	6.86552	1.01656	33	4.14289	0.987983	33	5.89444
Q14254	Flotillin-2	FLOT2	Flotillin-2 OS=Homo sapiens OX=9606 GN=FLOT2 PE=1 SV=2 - [FLOT2_HUMAN]	47.66	21	21	46	428	47.0347	5.24951	1.05789	46	8.14111	0.977145	46	5.34054	0.995154	46	4.74297	1.08865	46	6.98303	0.968097	46	7.66417	0.948593	46	5.12246
Q05682	Caldesmon	CALD1	Caldesmon OS=Homo sapiens OX=9606 GN=CALD1 PE=1 SV=3 - [CALD1_HUMAN]	29.63	23	23	47	793	93.1754	5.65576	0.963364	47	7.96476	1.04951	47	4.18101	1.06358	47	5.55886	0.908294	47	6.23449	1.05185	47	6.34935	1.0006	47	3.97522
Q86UE4	Protein LYRIC	MTDH	Protein LYRIC OS=Homo sapiens OX=9606 GN=MTDH PE=1 SV=2 - [LYRIC_HUMAN]	45.53	22	22	42	582	63.7988	9.31982	0.944628	42	11.6858	0.979252	42	8.17206	0.97301	42	6.78745	1.08897	42	10.7351	1.00703	42	6.13458	1.0002	42	12.5408
Q16851	UTP--glucose-1-phosphate uridylyltransferase	UGP2	UTP--glucose-1-phosphate uridylyltransferase OS=Homo sapiens OX=9606 GN=UGP2 PE=1 SV=5 - [UGPA_HUMAN]	49.41	22	22	52	508	56.9047	8.14795	1.05153	52	6.77388	0.980893	52	5.14894	1.01224	52	6.08454	0.996995	52	7.64761	0.959736	52	6.47161	0.995423	52	7.72898
O00232	26S proteasome non-ATPase regulatory subunit 12	PSMD12	26S proteasome non-ATPase regulatory subunit 12 OS=Homo sapiens OX=9606 GN=PSMD12 PE=1 SV=3 - [PSD12_HUMAN]	38.82	19	20	44	456	52.8706	7.6499	0.893856	42	12.0897	0.972687	42	10.5505	0.989896	42	8.23163	0.952494	42	8.75358	1.08311	42	13.6191	1.08367	42	12.1418
O43242	26S proteasome non-ATPase regulatory subunit 3	PSMD3	26S proteasome non-ATPase regulatory subunit 3 OS=Homo sapiens OX=9606 GN=PSMD3 PE=1 SV=2 - [PSMD3_HUMAN]	46.25	24	24	60	534	60.9395	8.44092	0.993083	60	10.2944	0.995643	60	6.61533	1.01654	60	6.3226	0.938353	60	7.65651	1.01912	60	9.19	1.01714	60	7.90796
P45974	Ubiquitin carboxyl-terminal hydrolase 5	USP5	Ubiquitin carboxyl-terminal hydrolase 5 OS=Homo sapiens OX=9606 GN=USP5 PE=1 SV=2 - [UBP5_HUMAN]	25.99	20	20	38	858	95.7253	5.03369	1.03119	35	7.89258	1.07931	35	8.34233	1.07533	35	5.97094	0.875223	35	11.2267	0.959256	35	8.62227	0.982916	35	9.04086
P14923	Junction plakoglobin	JUP	Junction plakoglobin OS=Homo sapiens OX=9606 GN=JUP PE=1 SV=3 - [PLAK_HUMAN]	37.99	19	22	36	745	81.6927	6.13818	0.979716	32	9.40472	1.0051	32	4.76696	0.997435	32	3.81112	1.05612	32	7.21804	0.987944	32	7.15378	0.979745	32	9.00184
P12429	Annexin A3	ANXA3	Annexin A3 OS=Homo sapiens OX=9606 GN=ANXA3 PE=1 SV=3 - [ANXA3_HUMAN]	50.77	17	17	40	323	36.3527	5.92236	0.970312	40	7.55604	1.0334	40	5.1149	1.04994	40	5.96285	0.83777	40	14.5232	1.02284	40	5.57453	1.07106	40	6.20518
O60763	General vesicular transport factor p115	USO1	General vesicular transport factor p115 OS=Homo sapiens OX=9606 GN=USO1 PE=1 SV=2 - [USO1_HUMAN]	29.83	25	25	47	962	107.828	4.90674	0.950734	47	5.85069	0.987849	47	3.82926	1.00797	47	4.25754	1.01882	47	7.46787	0.97518	47	9.34825	1.02933	47	7.21057
O43776	Asparagine--tRNA ligase, cytoplasmic	NARS	Asparagine--tRNA ligase, cytoplasmic OS=Homo sapiens OX=9606 GN=NARS PE=1 SV=1 - [SYNC_HUMAN]	42.7	20	21	45	548	62.9025	6.25244	1.00159	44	6.21383	0.990378	44	4.22597	1.02833	44	5.28597	0.986745	44	5.43993	1.02533	44	4.21731	1.00944	44	5.95071
Q53H82	Endoribonuclease LACTB2	LACTB2	Endoribonuclease LACTB2 OS=Homo sapiens OX=9606 GN=LACTB2 PE=1 SV=2 - [LACB2_HUMAN]	41.32	10	10	31	288	32.7849	6.80029	1.05341	31	9.06987	1.03701	31	6.03616	1.01991	31	5.9629	0.99566	31	7.09973	0.944952	31	5.29083	0.992834	31	4.1659
P25786	Proteasome subunit alpha type-1	PSMA1	Proteasome subunit alpha type-1 OS=Homo sapiens OX=9606 GN=PSMA1 PE=1 SV=1 - [PSA1_HUMAN]	45.25	13	13	41	263	29.5369	6.60986	0.956068	40	7.73748	0.999684	40	4.726	1.00498	40	4.33739	0.979206	40	6.98232	0.994734	40	8.71853	1.05439	40	9.53584
Q6WCQ1	Myosin phosphatase Rho-interacting protein	MPRIP	Myosin phosphatase Rho-interacting protein OS=Homo sapiens OX=9606 GN=MPRIP PE=1 SV=3 - [MPRIP_HUMAN]	43.71	36	37	61	1025	116.461	6.21436	0.976782	59	4.95843	1.01917	59	5.10144	1.02478	59	4.80747	1.04402	59	5.34287	0.992167	59	8.34665	0.974547	59	5.83667
Q15286	Ras-related protein Rab-35	RAB35	Ras-related protein Rab-35 OS=Homo sapiens OX=9606 GN=RAB35 PE=1 SV=1 - [RAB35_HUMAN]	52.24	8	10	36	201	23.0108	8.29443	0.976792	18	4.05241	0.946023	18	3.77888	0.950609	18	3.12232	1.08261	18	10.7985	1.04482	18	6.68439	1.00758	18	5.16391
Q02880	DNA topoisomerase 2-beta	TOP2B	DNA topoisomerase 2-beta OS=Homo sapiens OX=9606 GN=TOP2B PE=1 SV=3 - [TOP2B_HUMAN]	29.46	35	48	75	1626	183.152	8.00146	1.00008	51	9.94161	1.00272	51	4.10029	1.03703	51	4.08694	1.00313	51	7.36207	1.0026	51	6.78114	0.981109	51	8.44593
O95373	Importin-7	IPO7	Importin-7 OS=Homo sapiens OX=9606 GN=IPO7 PE=1 SV=1 - [IPO7_HUMAN]	18.88	16	16	35	1038	119.44	4.81787	0.977205	32	7.07825	0.984879	32	6.28166	1.01221	32	6.14095	0.981667	32	8.99967	1.03208	32	7.21539	1.04425	32	6.12439
P49915	GMP synthase [glutamine-hydrolyzing]	GMPS	GMP synthase [glutamine-hydrolyzing] OS=Homo sapiens OX=9606 GN=GMPS PE=1 SV=1 - [GUAA_HUMAN]	47.33	29	29	51	693	76.667	6.87354	1.06772	50	7.19545	1.06323	50	6.47023	1.08767	50	8.26584	0.919263	50	9.55465	0.927992	50	5.22269	0.954551	50	6.48688
P49257	Protein ERGIC-53	LMAN1	Protein ERGIC-53 OS=Homo sapiens OX=9606 GN=LMAN1 PE=1 SV=2 - [LMAN1_HUMAN]	40.39	18	19	46	510	57.513	6.771	0.971542	39	8.97483	0.855238	39	6.49466	0.883004	39	9.84844	1.24933	39	16.5888	0.990472	39	7.23823	0.983091	39	8.4213
Q08945	FACT complex subunit SSRP1	SSRP1	FACT complex subunit SSRP1 OS=Homo sapiens OX=9606 GN=SSRP1 PE=1 SV=1 - [SSRP1_HUMAN]	28.77	19	19	37	709	81.0244	6.87354	1.01445	37	9.80714	1.03225	37	5.55095	1.04743	37	4.40141	0.927567	37	6.06428	1.01027	37	4.90994	0.97037	37	5.28531
P39687	Acidic leucine-rich nuclear phosphoprotein 32 family member A	ANP32A	Acidic leucine-rich nuclear phosphoprotein 32 family member A OS=Homo sapiens OX=9606 GN=ANP32A PE=1 SV=1 - [AN32A_HUMAN]	52.61	7	14	46	249	28.5683	4.09424	1.0523	21	4.676	0.998312	21	3.08615	1.05596	21	5.02495	1.00944	21	3.03004	1.00253	21	5.20026	0.949241	21	3.51318
P09601	Heme oxygenase 1	HMOX1	Heme oxygenase 1 OS=Homo sapiens OX=9606 GN=HMOX1 PE=1 SV=1 - [HMOX1_HUMAN]	54.51	12	12	33	288	32.798	8.25049	0.960703	33	6.4648	1.05883	33	6.17987	1.04848	33	8.00956	0.851267	33	11.5044	1.08333	33	7.74626	1.00988	33	5.42717
P61204	ADP-ribosylation factor 3	ARF3	ADP-ribosylation factor 3 OS=Homo sapiens OX=9606 GN=ARF3 PE=1 SV=2 - [ARF3_HUMAN]	60.77	4	9	29	181	20.5877	7.43018	1.01878	20	8.33643	0.996931	20	7.60542	1.00071	20	6.25881	0.928138	20	7.54891	1.00465	20	6.41739	1.03577	20	9.00614
P41252	Isoleucine--tRNA ligase, cytoplasmic	IARS	Isoleucine--tRNA ligase, cytoplasmic OS=Homo sapiens OX=9606 GN=IARS PE=1 SV=2 - [SYIC_HUMAN]	27.02	31	31	54	1262	144.406	6.15088	0.971017	54	9.51706	0.999314	54	5.12256	1.02925	54	3.97135	0.98193	54	8.41188	1.01739	54	6.13568	1.00628	54	7.45022
Q8NBS9	Thioredoxin domain-containing protein 5	TXNDC5	Thioredoxin domain-containing protein 5 OS=Homo sapiens OX=9606 GN=TXNDC5 PE=1 SV=2 - [TXND5_HUMAN]	43.98	15	17	55	432	47.5987	5.97314	1.08418	50	8.72562	0.944553	50	5.79077	0.969227	50	4.8988	1.13621	50	9.64955	0.975983	50	9.56363	0.934582	50	6.75129
P51991	Heterogeneous nuclear ribonucleoprotein A3	HNRNPA3	Heterogeneous nuclear ribonucleoprotein A3 OS=Homo sapiens OX=9606 GN=HNRNPA3 PE=1 SV=2 - [ROA3_HUMAN]	39.42	13	16	53	378	39.5706	9.01221	1.0218	39	11.6608	1.02059	39	5.78227	1.02422	39	5.73101	0.991527	39	7.99556	1.01556	39	12.8007	0.955065	39	10.5909
O95202	Mitochondrial proton/calcium exchanger protein	LETM1	Mitochondrial proton/calcium exchanger protein OS=Homo sapiens OX=9606 GN=LETM1 PE=1 SV=1 - [LETM1_HUMAN]	34.51	23	23	38	739	83.302	6.69775	0.970734	38	8.34243	0.921104	38	4.59606	0.934341	38	5.65352	1.10823	38	7.67739	1.05905	38	7.9608	1.01094	38	4.84036
P05198	Eukaryotic translation initiation factor 2 subunit 1	EIF2S1	Eukaryotic translation initiation factor 2 subunit 1 OS=Homo sapiens OX=9606 GN=EIF2S1 PE=1 SV=3 - [IF2A_HUMAN]	60	16	16	36	315	36.0894	5.08447	0.970342	36	8.46993	0.970294	36	4.46328	1.00336	36	5.59524	1.01685	36	4.54954	1.03179	36	8.83287	1.01817	36	5.27349
P26639	Threonine--tRNA ligase, cytoplasmic	TARS	Threonine--tRNA ligase, cytoplasmic OS=Homo sapiens OX=9606 GN=TARS PE=1 SV=3 - [SYTC_HUMAN]	38.59	24	25	44	723	83.3819	6.66846	0.945615	40	8.65682	1.00007	40	4.11252	1.03319	40	6.42468	0.935259	40	9.39662	1.01061	40	6.45558	1.08518	40	5.82778
Q9NYL9	Tropomodulin-3	TMOD3	Tropomodulin-3 OS=Homo sapiens OX=9606 GN=TMOD3 PE=1 SV=1 - [TMOD3_HUMAN]	53.98	18	19	55	352	39.5703	5.18604	1.07968	53	7.37559	1.05834	53	3.98399	1.07412	53	7.41092	0.957889	53	7.48804	0.961815	53	6.93313	0.949722	53	7.8233
P60228	Eukaryotic translation initiation factor 3 subunit E	EIF3E	Eukaryotic translation initiation factor 3 subunit E OS=Homo sapiens OX=9606 GN=EIF3E PE=1 SV=1 - [EIF3E_HUMAN]	42.47	17	17	37	445	52.1874	6.03662	0.996676	37	11.2843	1.0227	37	6.78181	1.0153	37	3.50887	0.978069	37	5.64941	0.995921	37	4.67429	1.00908	37	6.72253
P25788	Proteasome subunit alpha type-3	PSMA3	Proteasome subunit alpha type-3 OS=Homo sapiens OX=9606 GN=PSMA3 PE=1 SV=2 - [PSA3_HUMAN]	56.47	17	17	36	255	28.4151	5.32568	1.01391	34	11.2349	0.993684	34	5.09466	1.00584	34	6.03242	0.986527	34	6.34468	1.01542	34	10.0475	1.00688	34	5.55148
Q12874	Splicing factor 3A subunit 3	SF3A3	Splicing factor 3A subunit 3 OS=Homo sapiens OX=9606 GN=SF3A3 PE=1 SV=1 - [SF3A3_HUMAN]	37.13	17	18	40	501	58.8123	5.37646	1.0435	37	6.7146	0.983445	37	5.68714	0.990325	37	6.30354	1.01745	37	7.38203	1.01293	37	5.50083	0.954663	37	5.17694
P60891	Ribose-phosphate pyrophosphokinase 1	PRPS1	Ribose-phosphate pyrophosphokinase 1 OS=Homo sapiens OX=9606 GN=PRPS1 PE=1 SV=2 - [PRPS1_HUMAN]	42.45	7	13	26	318	34.8119	6.97607	0.995251	15	10.2399	1.03264	15	3.27218	1.04584	15	2.73268	0.946588	15	5.25849	0.99314	15	6.5137	1.04387	15	6.38219
Q9Y262	Eukaryotic translation initiation factor 3 subunit L	EIF3L	Eukaryotic translation initiation factor 3 subunit L OS=Homo sapiens OX=9606 GN=EIF3L PE=1 SV=1 - [EIF3L_HUMAN]	39.72	21	21	51	564	66.6844	6.34131	0.982734	51	7.24375	1.01051	51	4.01653	1.00661	51	5.27001	0.964657	51	7.47053	1.00403	51	5.60033	1.01207	51	7.33227
P60953	Cell division control protein 42 homolog	CDC42	Cell division control protein 42 homolog OS=Homo sapiens OX=9606 GN=CDC42 PE=1 SV=2 - [CDC42_HUMAN]	41.36	6	7	40	191	21.245	6.55127	1.05939	36	6.37826	0.996012	36	4.63647	1.00058	36	4.52758	0.984554	36	5.97057	0.969093	36	6.79079	1.00072	36	5.77974
P42285	Exosome RNA helicase MTR4	MTREX	Exosome RNA helicase MTR4 OS=Homo sapiens OX=9606 GN=MTREX PE=1 SV=3 - [MTREX_HUMAN]	22.07	20	20	43	1042	117.729	6.52197	1.01604	43	8.13027	1.01564	43	5.93566	1.04538	43	4.822	0.969768	43	6.97635	1.0076	43	8.1296	0.970006	43	6.05645
Q08257	Quinone oxidoreductase	CRYZ	Quinone oxidoreductase OS=Homo sapiens OX=9606 GN=CRYZ PE=1 SV=1 - [QOR_HUMAN]	52.28	14	14	46	329	35.1845	8.44092	1.04651	46	6.73661	0.947912	46	4.34256	0.952513	46	5.22244	1.11529	46	5.85412	0.974971	46	8.23439	0.982631	46	4.66166
P61106	Ras-related protein Rab-14	RAB14	Ras-related protein Rab-14 OS=Homo sapiens OX=9606 GN=RAB14 PE=1 SV=4 - [RAB14_HUMAN]	48.84	7	8	29	215	23.8819	6.21436	0.901197	16	5.58868	0.923696	16	5.83277	0.878283	16	3.93426	1.1687	16	11.4901	0.974992	16	9.30357	1.05848	16	5.34455
P12235	ADP/ATP translocase 1	SLC25A4	ADP/ATP translocase 1 OS=Homo sapiens OX=9606 GN=SLC25A4 PE=1 SV=4 - [ADT1_HUMAN]	55.03	5	18	47	298	33.0432	9.75928	0.937298	9	3.31886	0.846736	9	7.25588	0.860997	9	4.00323	1.2189	9	8.16162	1.03304	9	4.52261	1.03046	9	3.19094
P12236	ADP/ATP translocase 3	SLC25A6	ADP/ATP translocase 3 OS=Homo sapiens OX=9606 GN=SLC25A6 PE=1 SV=4 - [ADT3_HUMAN]	54.36	2	18	62	298	32.8452	9.74463	0.895492	4	5.47976	0.888867	4	8.24789	0.918237	4	0.604806	1.06173	4	3.85561	1.16059	4	8.46054	1.03937	4	5.02897
P40429	60S ribosomal protein L13a	RPL13A	60S ribosomal protein L13a OS=Homo sapiens OX=9606 GN=RPL13A PE=1 SV=2 - [RL13A_HUMAN]	54.68	15	15	45	203	23.5624	10.9312	1.019	41	4.75834	1.00087	41	4.1774	1.01291	41	5.16026	1.04789	41	5.46049	0.970545	41	9.79759	0.968081	41	6.52129
Q96HE7	ERO1-like protein alpha	ERO1A	ERO1-like protein alpha OS=Homo sapiens OX=9606 GN=ERO1A PE=1 SV=2 - [ERO1A_HUMAN]	31.84	14	14	27	468	54.3581	5.68115	0.996945	27	10.7354	0.881182	27	7.88433	0.866671	27	4.32476	1.26297	27	7.44221	1.02465	27	4.25933	0.985643	27	9.45244
O95678	Keratin, type II cytoskeletal 75	KRT75	Keratin, type II cytoskeletal 75 OS=Homo sapiens OX=9606 GN=KRT75 PE=1 SV=2 - [K2C75_HUMAN]	22.32	2	16	140	551	59.524	7.73779	1.03234	4	0.729839	1.00139	4	3.59134	1.02319	4	0.95105	1.13325	4	2.51931	0.955824	4	2.21261	0.893514	4	2.14803
P62873	Guanine nucleotide-binding protein G(I)/G(S)/G(T) subunit beta-1	GNB1	Guanine nucleotide-binding protein G(I)/G(S)/G(T) subunit beta-1 OS=Homo sapiens OX=9606 GN=GNB1 PE=1 SV=3 - [GBB1_HUMAN]	41.76	6	12	34	340	37.353	5.99854	1.00551	12	5.44796	0.971862	12	5.85856	0.986465	12	2.91902	1.06168	12	6.75502	1.00294	12	5.68244	1.00818	12	4.72028
Q58FG1	Putative heat shock protein HSP 90-alpha A4	HSP90AA4P	Putative heat shock protein HSP 90-alpha A4 OS=Homo sapiens OX=9606 GN=HSP90AA4P PE=5 SV=1 - [HS904_HUMAN]	12.2	1	5	32	418	47.6821	5.18604	0.865568	1		1.16277	1		0.997263	1		0.767258	1		1.34377	1		0.91298	1
P15170	Eukaryotic peptide chain release factor GTP-binding subunit ERF3A	GSPT1	Eukaryotic peptide chain release factor GTP-binding subunit ERF3A OS=Homo sapiens OX=9606 GN=GSPT1 PE=1 SV=1 - [ERF3A_HUMAN]	34.87	15	15	40	499	55.7203	5.61768	1.02407	40	7.32381	1.02232	40	6.222	1.04101	40	6.45743	0.914715	40	9.39102	0.990429	40	7.18184	1.01561	40	5.56189
O75390	Citrate synthase, mitochondrial	CS	Citrate synthase, mitochondrial OS=Homo sapiens OX=9606 GN=CS PE=1 SV=2 - [CISY_HUMAN]	37.77	16	16	54	466	51.6795	8.32373	0.950767	54	8.67804	0.887178	54	7.03406	0.91821	54	5.70703	1.15464	54	8.88982	1.07508	54	7.76016	1.0116	54	4.32805
Q2TB90	Putative hexokinase HKDC1	HKDC1	Putative hexokinase HKDC1 OS=Homo sapiens OX=9606 GN=HKDC1 PE=1 SV=3 - [HKDC1_HUMAN]	26.94	23	27	43	917	102.478	7.12256	1.00313	36	6.73234	0.979207	36	4.65566	0.988535	36	3.60826	1.01855	36	4.44611	1.02668	36	6.56212	0.999497	36	4.83686
P35606	Coatomer subunit beta'	COPB2	Coatomer subunit beta' OS=Homo sapiens OX=9606 GN=COPB2 PE=1 SV=2 - [COPB2_HUMAN]	26.05	22	22	47	906	102.422	5.2749	0.984267	47	7.37902	0.955113	46	4.94353	0.999671	47	5.50009	0.990569	47	6.83304	1.01891	47	8.29688	1.06209	47	5.87299
P54920	Alpha-soluble NSF attachment protein	NAPA	Alpha-soluble NSF attachment protein OS=Homo sapiens OX=9606 GN=NAPA PE=1 SV=3 - [SNAA_HUMAN]	45.08	12	12	29	295	33.2113	5.36377	1.01916	29	8.52373	1.01984	29	8.13939	1.05218	29	7.54483	0.951728	29	9.83434	0.974471	29	10.563	0.962887	29	11.3123
P46783	40S ribosomal protein S10	RPS10	40S ribosomal protein S10 OS=Homo sapiens OX=9606 GN=RPS10 PE=1 SV=1 - [RS10_HUMAN]	60	13	14	51	165	18.8859	10.1548	1.04039	47	6.41486	1.03734	47	6.86566	1.06643	47	6.13877	0.938681	47	16.5036	0.983668	47	7.93767	1.00081	47	5.56658
P61604	10 kDa heat shock protein, mitochondrial	HSPE1	10 kDa heat shock protein, mitochondrial OS=Homo sapiens OX=9606 GN=HSPE1 PE=1 SV=2 - [CH10_HUMAN]	77.45	11	11	64	102	10.9249	8.92432	1.01017	64	5.44681	0.895843	64	7.05742	0.886445	64	6.12683	1.18639	64	9.06843	1.03387	64	4.54683	0.97804	64	3.97825
Q9NSE4	Isoleucine--tRNA ligase, mitochondrial	IARS2	Isoleucine--tRNA ligase, mitochondrial OS=Homo sapiens OX=9606 GN=IARS2 PE=1 SV=2 - [SYIM_HUMAN]	29.55	27	28	56	1012	113.719	7.1958	0.975426	54	6.249	0.918361	54	5.44894	0.938334	54	4.72274	1.1547	54	7.04708	1.036	54	5.09762	0.991256	54	6.09055
P22570	NADPH:adrenodoxin oxidoreductase, mitochondrial	FDXR	NADPH:adrenodoxin oxidoreductase, mitochondrial OS=Homo sapiens OX=9606 GN=FDXR PE=1 SV=3 - [ADRO_HUMAN]	48.88	19	19	50	491	53.803	8.44092	0.821074	49	16.9805	0.78289	49	21.8427	0.775149	49	18.9283	1.23755	49	14.8357	1.13089	49	7.94666	1.12143	49	8.18803
Q01130	Serine/arginine-rich splicing factor 2	SRSF2	Serine/arginine-rich splicing factor 2 OS=Homo sapiens OX=9606 GN=SRSF2 PE=1 SV=4 - [SRSF2_HUMAN]	30.32	6	6	25	221	25.4612	11.854	1.02187	25	7.2463	1.02179	25	6.32407	0.996287	25	7.01114	0.965011	25	10.2634	1.0209	25	5.54066	0.981199	25	9.21273
P19367	Hexokinase-1	HK1	Hexokinase-1 OS=Homo sapiens OX=9606 GN=HK1 PE=1 SV=3 - [HXK1_HUMAN]	25.52	20	24	48	917	102.42	6.80029	1.00033	41	7.53726	0.921589	41	6.71217	0.938309	41	3.43825	1.1245	41	6.71111	1.00091	41	6.74836	1.01933	41	6.4698
Q99536	Synaptic vesicle membrane protein VAT-1 homolog	VAT1	Synaptic vesicle membrane protein VAT-1 homolog OS=Homo sapiens OX=9606 GN=VAT1 PE=1 SV=2 - [VAT1_HUMAN]	44.27	11	11	21	393	41.8934	6.29053	0.907267	21	16.2774	0.887612	21	8.89909	0.890634	21	9.0804	1.12304	21	9.09026	1.05534	21	13.8121	1.05822	21	8.23771
Q06323	Proteasome activator complex subunit 1	PSME1	Proteasome activator complex subunit 1 OS=Homo sapiens OX=9606 GN=PSME1 PE=1 SV=1 - [PSME1_HUMAN]	56.63	15	15	33	249	28.705	6.02393	1.17281	33	17.2731	0.992841	33	5.41531	1.03838	33	6.86474	0.959615	33	5.53172	0.884052	33	11.6442	0.949378	33	8.67044
P62140	Serine/threonine-protein phosphatase PP1-beta catalytic subunit	PPP1CB	Serine/threonine-protein phosphatase PP1-beta catalytic subunit OS=Homo sapiens OX=9606 GN=PPP1CB PE=1 SV=3 - [PP1B_HUMAN]	44.95	4	12	37	327	37.1626	6.18896	0.967635	8	3.8214	0.983014	8	5.99027	0.987915	8	6.53131	1.03358	8	7.51763	0.988123	8	8.08015	1.02861	8	4.86033
Q9UHD8	Septin-9	SEPT9	Septin-9 OS=Homo sapiens OX=9606 GN=SEPT9 PE=1 SV=2 - [SEPT9_HUMAN]	43.34	23	23	56	586	65.3608	8.96826	0.942551	56	11.0522	0.979635	56	4.29222	0.999482	56	5.08633	1.01437	56	10.9577	1.05477	56	6.64144	0.998008	56	8.48351
O76021	Ribosomal L1 domain-containing protein 1	RSL1D1	Ribosomal L1 domain-containing protein 1 OS=Homo sapiens OX=9606 GN=RSL1D1 PE=1 SV=3 - [RL1D1_HUMAN]	43.47	24	24	53	490	54.9389	10.1255	0.975447	53	8.27613	0.945973	53	5.93796	0.954898	53	4.79872	1.09093	53	6.93185	1.03628	53	4.96044	1.00054	53	4.86036
O95757	Heat shock 70 kDa protein 4L	HSPA4L	Heat shock 70 kDa protein 4L OS=Homo sapiens OX=9606 GN=HSPA4L PE=1 SV=3 - [HS74L_HUMAN]	32.78	17	24	47	839	94.4525	5.88428	0.90533	24	9.95319	0.92484	24	8.01969	0.909097	24	4.85192	1.07525	24	5.69022	1.0726	24	7.8449	1.10521	24	5.85296
P52565	Rho GDP-dissociation inhibitor 1	ARHGDIA	Rho GDP-dissociation inhibitor 1 OS=Homo sapiens OX=9606 GN=ARHGDIA PE=1 SV=3 - [GDIR1_HUMAN]	70.59	11	11	47	204	23.1927	5.10986	1.05212	47	12.0837	1.11305	47	5.48352	1.10847	47	7.75	0.777612	47	11.6633	0.981249	47	7.89126	1.00141	47	8.15008
P20290	Transcription factor BTF3	BTF3	Transcription factor BTF3 OS=Homo sapiens OX=9606 GN=BTF3 PE=1 SV=1 - [BTF3_HUMAN]	65.05	9	10	22	206	22.1544	9.37842	1.12136	21	14.6616	1.08177	21	8.13599	1.10578	21	12.0642	0.881607	21	5.00762	0.957264	21	9.2998	0.951655	21	11.8822
P28838	Cytosol aminopeptidase	LAP3	Cytosol aminopeptidase OS=Homo sapiens OX=9606 GN=LAP3 PE=1 SV=3 - [AMPL_HUMAN]	42.39	19	19	38	519	56.1308	7.92822	1.00845	37	6.1354	0.969618	37	5.44058	0.995565	37	4.39129	1.02658	37	4.33004	0.998216	37	6.46711	1.01787	37	3.93402
P51114	Fragile X mental retardation syndrome-related protein 1	FXR1	Fragile X mental retardation syndrome-related protein 1 OS=Homo sapiens OX=9606 GN=FXR1 PE=1 SV=3 - [FXR1_HUMAN]	36.71	17	19	37	621	69.6779	6.15088	0.949981	30	8.22548	0.986696	30	6.67971	1.00245	30	8.3992	1.02234	30	10.1321	0.989975	30	11.438	1.00098	30	9.35563
O15439	Multidrug resistance-associated protein 4	ABCC4	Multidrug resistance-associated protein 4 OS=Homo sapiens OX=9606 GN=ABCC4 PE=1 SV=3 - [MRP4_HUMAN]	12.68	13	15	27	1325	149.432	8.19189	1.042	23	9.80607	1.01434	23	3.92094	0.990011	23	4.2765	1.01569	23	8.98934	0.997826	23	4.24223	0.93587	23	7.22602
P29966	Myristoylated alanine-rich C-kinase substrate	MARCKS	Myristoylated alanine-rich C-kinase substrate OS=Homo sapiens OX=9606 GN=MARCKS PE=1 SV=4 - [MARCS_HUMAN]	33.73	6	6	24	332	31.5359	4.44971	1.09522	24	10.0699	0.953948	24	6.7007	0.988662	24	8.11931	1.09179	24	12.057	1.03208	24	5.85856	0.914434	24	7.0926
Q9UJS0	Calcium-binding mitochondrial carrier protein Aralar2	SLC25A13	Calcium-binding mitochondrial carrier protein Aralar2 OS=Homo sapiens OX=9606 GN=SLC25A13 PE=1 SV=2 - [CMC2_HUMAN]	30.52	12	18	31	675	74.1286	8.6167	0.952818	20	7.00824	0.957811	20	3.3369	0.955273	20	2.87121	1.10145	20	3.58123	1.03498	20	4.9752	0.991187	20	5.64305
P36871	Phosphoglucomutase-1	PGM1	Phosphoglucomutase-1 OS=Homo sapiens OX=9606 GN=PGM1 PE=1 SV=3 - [PGM1_HUMAN]	35.05	20	20	35	562	61.4105	6.75635	1.05483	35	7.93634	1.0664	35	4.25808	1.09914	35	5.13746	0.876891	35	10.0105	0.950825	35	6.44816	1.01878	35	5.59218
P53618	Coatomer subunit beta	COPB1	Coatomer subunit beta OS=Homo sapiens OX=9606 GN=COPB1 PE=1 SV=3 - [COPB_HUMAN]	26.65	24	24	45	953	107.074	6.04932	0.953235	45	9.58262	0.974696	45	7.1224	0.971665	45	5.43867	0.998656	45	8.29035	1.0296	45	7.85655	1.0369	45	9.65147
O75396	Vesicle-trafficking protein SEC22b	SEC22B	Vesicle-trafficking protein SEC22b OS=Homo sapiens OX=9606 GN=SEC22B PE=1 SV=4 - [SC22B_HUMAN]	38.6	8	8	24	215	24.5775	6.91748	1.00459	24	5.33326	0.914992	24	4.09252	0.910641	24	3.85622	1.21379	24	7.0554	1.01398	24	5.15435	0.960424	24	5.39457
P31150	Rab GDP dissociation inhibitor alpha	GDI1	Rab GDP dissociation inhibitor alpha OS=Homo sapiens OX=9606 GN=GDI1 PE=1 SV=2 - [GDIA_HUMAN]	45.41	9	16	38	447	50.5501	5.13525	0.968457	22	6.46379	0.98373	22	8.75832	0.984635	22	3.97359	0.999104	22	8.95074	0.979721	22	11.2328	1.0811	22	7.18777
Q01469	Fatty acid-binding protein 5	FABP5	Fatty acid-binding protein 5 OS=Homo sapiens OX=9606 GN=FABP5 PE=1 SV=3 - [FABP5_HUMAN]	76.3	10	10	26	135	15.1546	7.00537	1.02016	24	5.5165	1.06831	24	4.32892	1.07731	24	3.52192	0.796624	24	7.75282	1.00713	24	7.70907	1.08915	24	8.0306
P18124	60S ribosomal protein L7	RPL7	60S ribosomal protein L7 OS=Homo sapiens OX=9606 GN=RPL7 PE=1 SV=1 - [RL7_HUMAN]	48.79	17	18	59	248	29.2072	10.6528	1.05581	55	7.35325	1.00675	55	6.48865	1.01694	55	7.62252	1.05385	55	5.46048	0.965414	55	10.3476	0.940585	55	6.22141
P22392	Nucleoside diphosphate kinase B	NME2	Nucleoside diphosphate kinase B OS=Homo sapiens OX=9606 GN=NME2 PE=1 SV=1 - [NDKB_HUMAN]	80.92	2	11	75	152	17.2869	8.41162	1.02936	9	2.25379	1.04433	9	7.27068	1.04864	9	5.61919	0.82292	9	11.9486	1.03113	9	3.68346	1.00072	9	9.4172
Q14126	Desmoglein-2	DSG2	Desmoglein-2 OS=Homo sapiens OX=9606 GN=DSG2 PE=1 SV=2 - [DSG2_HUMAN]	26.74	23	23	36	1118	122.218	5.23682	0.961487	36	8.84339	0.9919	36	5.48846	0.99035	36	6.98885	1.01475	36	10.4363	1.02747	36	5.35338	1.00622	36	6.35137
Q14257	Reticulocalbin-2	RCN2	Reticulocalbin-2 OS=Homo sapiens OX=9606 GN=RCN2 PE=1 SV=1 - [RCN2_HUMAN]	47.63	12	12	26	317	36.8536	4.39893	1.00924	26	6.83189	0.975175	26	6.94997	0.970756	26	5.72147	1.12862	26	10.5704	0.968502	26	6.88705	0.967282	26	6.98959
P27695	DNA-(apurinic or apyrimidinic site) lyase	APEX1	DNA-(apurinic or apyrimidinic site) lyase OS=Homo sapiens OX=9606 GN=APEX1 PE=1 SV=2 - [APEX1_HUMAN]	43.4	10	10	25	318	35.5322	8.11865	1.01329	25	7.95016	1.00354	25	5.58549	1.03998	25	5.42906	1.00977	25	5.85661	0.987241	25	10.0071	0.969672	25	6.4355
P16070	CD44 antigen	CD44	CD44 antigen OS=Homo sapiens OX=9606 GN=CD44 PE=1 SV=3 - [CD44_HUMAN]	11.59	8	8	44	742	81.4874	5.32568	0.987194	43	5.04055	0.858383	43	10.5129	0.831435	43	9.53891	1.27778	43	13.9031	0.979499	43	9.58467	1.0652	43	6.25121
O60271	C-Jun-amino-terminal kinase-interacting protein 4	SPAG9	C-Jun-amino-terminal kinase-interacting protein 4 OS=Homo sapiens OX=9606 GN=SPAG9 PE=1 SV=4 - [JIP4_HUMAN]	22.18	26	27	43	1321	146.115	5.14795	1.01448	38	6.10863	1.00785	38	5.39011	1.0563	38	5.39785	0.957387	38	8.42706	0.986207	38	6.37918	1.02112	38	3.67929
P49736	DNA replication licensing factor MCM2	MCM2	DNA replication licensing factor MCM2 OS=Homo sapiens OX=9606 GN=MCM2 PE=1 SV=4 - [MCM2_HUMAN]	24.45	20	20	40	904	101.832	5.51611	1.07572	38	11.4094	1.15003	38	5.99573	1.19421	38	9.11634	0.803418	38	10.6415	0.911538	38	6.35154	0.927135	38	8.25328
Q9P0M6	Core histone macro-H2A.2	H2AFY2	Core histone macro-H2A.2 OS=Homo sapiens OX=9606 GN=H2AFY2 PE=1 SV=3 - [H2AW_HUMAN]	44.35	11	13	23	372	40.0334	9.68604	1.04045	17	6.19841	1.03086	17	5.89884	1.02479	17	3.09047	1.07127	17	9.03002	0.930333	17	6.6634	0.955975	17	4.8903
Q93008	Probable ubiquitin carboxyl-terminal hydrolase FAF-X	USP9X	Probable ubiquitin carboxyl-terminal hydrolase FAF-X OS=Homo sapiens OX=9606 GN=USP9X PE=1 SV=3 - [USP9X_HUMAN]	17.12	42	44	64	2570	292.094	5.79541	0.992527	61	7.20381	1.04332	61	5.80707	1.05201	61	7.47613	0.917949	61	7.94629	1.00193	61	5.66639	0.995043	61	6.65176
P13073	Cytochrome c oxidase subunit 4 isoform 1, mitochondrial	COX4I1	Cytochrome c oxidase subunit 4 isoform 1, mitochondrial OS=Homo sapiens OX=9606 GN=COX4I1 PE=1 SV=1 - [COX41_HUMAN]	39.64	8	8	57	169	19.564	9.51025	0.956476	57	6.12621	0.896983	57	10.7878	0.898518	57	9.7051	1.1801	57	8.66516	1.03744	57	5.54229	1.0076	57	5.18169
O14818	Proteasome subunit alpha type-7	PSMA7	Proteasome subunit alpha type-7 OS=Homo sapiens OX=9606 GN=PSMA7 PE=1 SV=1 - [PSA7_HUMAN]	39.52	10	10	28	248	27.8696	8.45557	0.968411	28	16.0788	1.00374	28	4.67863	1.01868	28	3.69591	0.959448	28	6.44252	0.972439	28	7.95318	1.01696	28	11.244
Q13442	28 kDa heat- and acid-stable phosphoprotein	PDAP1	28 kDa heat- and acid-stable phosphoprotein OS=Homo sapiens OX=9606 GN=PDAP1 PE=1 SV=1 - [HAP28_HUMAN]	55.25	13	13	36	181	20.6176	8.86572	1.02477	36	8.296	1.03872	36	4.77323	1.05032	36	4.48322	0.911169	36	6.706	0.993493	36	7.64035	0.979746	36	3.82558
P62714	Serine/threonine-protein phosphatase 2A catalytic subunit beta isoform	PPP2CB	Serine/threonine-protein phosphatase 2A catalytic subunit beta isoform OS=Homo sapiens OX=9606 GN=PPP2CB PE=1 SV=1 - [PP2AB_HUMAN]	51.13	2	13	26	309	35.5523	5.42725	1.01047	5	4.01609	0.984114	5	2.32008	0.984304	5	4.54666	0.97733	5	5.2184	1.04608	5	6.64425	1.04721	5	2.13633
P50570	Dynamin-2	DNM2	Dynamin-2 OS=Homo sapiens OX=9606 GN=DNM2 PE=1 SV=2 - [DYN2_HUMAN]	34.48	17	31	47	870	98.0032	7.44482	1.07506	25	8.9952	1.00112	25	4.96821	1.04164	25	8.24119	0.989439	25	8.8048	0.965518	25	7.32851	0.994555	25	9.80791
P34897	Serine hydroxymethyltransferase, mitochondrial	SHMT2	Serine hydroxymethyltransferase, mitochondrial OS=Homo sapiens OX=9606 GN=SHMT2 PE=1 SV=3 - [GLYM_HUMAN]	37.5	16	17	34	504	55.9577	8.52881	0.923303	33	6.96558	0.880756	33	8.13636	0.89191	33	8.60838	1.18377	33	8.98379	1.05629	33	8.53347	1.02861	33	4.51051
Q13045	Protein flightless-1 homolog	FLII	Protein flightless-1 homolog OS=Homo sapiens OX=9606 GN=FLII PE=1 SV=2 - [FLII_HUMAN]	27.82	32	32	45	1269	144.66	6.04932	0.95707	45	6.59547	0.967468	45	4.34324	0.998484	45	4.31836	1.02864	45	6.30599	1.02249	45	5.10183	1.03074	45	4.65313
O00116	Alkyldihydroxyacetonephosphate synthase, peroxisomal	AGPS	Alkyldihydroxyacetonephosphate synthase, peroxisomal OS=Homo sapiens OX=9606 GN=AGPS PE=1 SV=1 - [ADAS_HUMAN]	27.51	15	15	27	658	72.8658	7.34229	0.98546	27	6.72736	0.996999	27	4.79853	0.979359	27	2.87812	1.09384	27	7.25195	0.96999	27	4.07142	0.995884	27	7.27495
P46459	Vesicle-fusing ATPase	NSF	Vesicle-fusing ATPase OS=Homo sapiens OX=9606 GN=NSF PE=1 SV=3 - [NSF_HUMAN]	36.96	26	27	37	744	82.5421	6.94678	0.993777	36	5.56237	0.961695	36	4.84734	0.986777	36	4.20339	1.08547	36	5.91435	1.01265	36	5.59713	0.988211	36	4.81318
Q15165	Serum paraoxonase/arylesterase 2	PON2	Serum paraoxonase/arylesterase 2 OS=Homo sapiens OX=9606 GN=PON2 PE=1 SV=4 - [PON2_HUMAN]	42.94	9	9	29	354	39.3563	5.60498	0.998295	29	7.59712	0.93455	29	3.15515	0.944086	29	5.64313	1.15782	29	8.88238	0.96212	29	9.97063	0.962855	29	7.04595
P07384	Calpain-1 catalytic subunit	CAPN1	Calpain-1 catalytic subunit OS=Homo sapiens OX=9606 GN=CAPN1 PE=1 SV=1 - [CAN1_HUMAN]	37.39	24	25	52	714	81.8382	5.66846	0.980306	42	9.24261	1.05037	42	4.22891	1.05397	42	5.80866	0.851094	42	11.9148	1.00528	42	6.39014	1.04105	42	5.33237
P26006	Integrin alpha-3	ITGA3	Integrin alpha-3 OS=Homo sapiens OX=9606 GN=ITGA3 PE=1 SV=5 - [ITA3_HUMAN]	17.79	17	17	44	1051	116.538	6.771	0.853569	44	15.1169	0.81227	44	10.3951	0.780935	44	13.7	1.28065	44	9.12327	1.08041	44	10.3193	1.11495	44	7.86593
Q01844	RNA-binding protein EWS	EWSR1	RNA-binding protein EWS OS=Homo sapiens OX=9606 GN=EWSR1 PE=1 SV=1 - [EWS_HUMAN]	14.48	7	7	22	656	68.4357	9.33447	1.034	22	8.92489	1.03202	22	4.93254	1.08182	22	4.27799	0.972862	22	10.243	1.00608	22	6.58147	0.941436	22	9.27029
Q9H9B4	Sideroflexin-1	SFXN1	Sideroflexin-1 OS=Homo sapiens OX=9606 GN=SFXN1 PE=1 SV=4 - [SFXN1_HUMAN]	56.21	13	14	29	322	35.5963	9.0708	1.00505	28	11.7448	0.917895	28	6.27798	0.968721	28	9.41252	1.12745	28	13.9287	1.03177	28	7.41191	0.998726	28	6.2914
O15371	Eukaryotic translation initiation factor 3 subunit D	EIF3D	Eukaryotic translation initiation factor 3 subunit D OS=Homo sapiens OX=9606 GN=EIF3D PE=1 SV=1 - [EIF3D_HUMAN]	30.66	11	11	25	548	63.9324	6.04932	0.993897	25	3.98121	1.00136	25	6.65336	1.00966	25	4.63418	0.952435	25	4.08852	1.01679	25	4.36502	1.03082	25	6.50813
O15372	Eukaryotic translation initiation factor 3 subunit H	EIF3H	Eukaryotic translation initiation factor 3 subunit H OS=Homo sapiens OX=9606 GN=EIF3H PE=1 SV=1 - [EIF3H_HUMAN]	25.28	10	10	35	352	39.9051	6.53662	1.03204	35	5.82766	1.04063	35	5.88784	1.02871	35	5.51702	0.97176	35	6.49604	0.981834	35	11.7825	0.978322	35	5.59172
P24534	Elongation factor 1-beta	EEF1B2	Elongation factor 1-beta OS=Homo sapiens OX=9606 GN=EEF1B2 PE=1 SV=3 - [EF1B_HUMAN]	56	8	11	40	225	24.7483	4.66553	0.944416	31	5.36128	0.94446	31	4.56731	0.953471	31	4.2439	1.05945	31	5.14693	1.02352	31	4.10403	1.02865	31	5.28744
Q9NTK5	Obg-like ATPase 1	OLA1	Obg-like ATPase 1 OS=Homo sapiens OX=9606 GN=OLA1 PE=1 SV=2 - [OLA1_HUMAN]	43.69	17	17	40	396	44.7153	7.81104	1.05288	40	7.78519	1.03924	40	3.50199	1.08913	40	4.57808	0.870075	40	6.8295	0.958331	40	5.59913	1.01668	40	6.07039
Q16181	Septin-7	SEPT7	Septin-7 OS=Homo sapiens OX=9606 GN=SEPT7 PE=1 SV=2 - [SEPT7_HUMAN]	32.27	14	15	45	437	50.648	8.63135	0.966083	41	6.59674	0.973589	41	5.59373	0.991466	41	3.80322	1.0641	41	5.96727	1.03805	41	7.22052	0.995074	41	5.66405
P28331	NADH-ubiquinone oxidoreductase 75 kDa subunit, mitochondrial	NDUFS1	NADH-ubiquinone oxidoreductase 75 kDa subunit, mitochondrial OS=Homo sapiens OX=9606 GN=NDUFS1 PE=1 SV=3 - [NDUS1_HUMAN]	43.6	23	23	47	727	79.4165	6.22705	0.967267	47	5.29834	0.939251	47	5.82185	0.938157	47	4.45672	1.07461	47	5.1162	1.0553	47	7.88324	1.0249	47	4.91526
Q13310	Polyadenylate-binding protein 4	PABPC4	Polyadenylate-binding protein 4 OS=Homo sapiens OX=9606 GN=PABPC4 PE=1 SV=1 - [PABP4_HUMAN]	29.19	12	18	35	644	70.7381	9.26123	1.0416	17	3.84734	0.997545	17	6.0887	1.0536	17	6.07039	1.01102	17	5.05265	1.00963	17	7.33546	0.980238	17	4.86867
P30040	Endoplasmic reticulum resident protein 29	ERP29	Endoplasmic reticulum resident protein 29 OS=Homo sapiens OX=9606 GN=ERP29 PE=1 SV=4 - [ERP29_HUMAN]	54.41	12	12	38	261	28.9752	7.31299	0.984201	38	7.01471	0.896162	38	7.43049	0.89598	38	6.27869	1.26694	38	7.16137	0.996429	38	7.73712	0.973029	38	4.92782
Q15046	Lysine--tRNA ligase	KARS	Lysine--tRNA ligase OS=Homo sapiens OX=9606 GN=KARS PE=1 SV=3 - [SYK_HUMAN]	33.84	21	21	51	597	68.0046	6.354	0.979109	51	6.69664	0.982838	51	4.41332	1.01083	51	6.09857	1.01434	51	6.85342	1.02415	51	5.29778	1.00201	51	5.09444
Q13185	Chromobox protein homolog 3	CBX3	Chromobox protein homolog 3 OS=Homo sapiens OX=9606 GN=CBX3 PE=1 SV=4 - [CBX3_HUMAN]	62.3	7	9	27	183	20.7984	5.32568	1.05279	22	11.4003	1.12685	22	3.34481	1.12978	22	6.64776	0.889823	22	9.09605	0.976736	22	13.3671	0.88064	22	5.82298
Q01105	Protein SET	SET	Protein SET OS=Homo sapiens OX=9606 GN=SET PE=1 SV=3 - [SET_HUMAN]	37.24	10	10	38	290	33.4687	4.32275	1.04534	37	4.47621	1.04369	37	4.08789	1.05205	37	4.92396	0.936479	37	4.80166	0.997529	37	6.36079	0.953552	37	4.65586
Q14847	LIM and SH3 domain protein 1	LASP1	LIM and SH3 domain protein 1 OS=Homo sapiens OX=9606 GN=LASP1 PE=1 SV=2 - [LASP1_HUMAN]	67.82	17	17	58	261	29.6982	7.04932	1.02669	58	7.72819	1.02208	58	4.02024	1.01863	58	4.55527	0.917664	58	10.118	0.990325	58	9.29107	1.05719	58	5.53381
Q14203	Dynactin subunit 1	DCTN1	Dynactin subunit 1 OS=Homo sapiens OX=9606 GN=DCTN1 PE=1 SV=3 - [DCTN1_HUMAN]	30.36	32	33	46	1278	141.607	5.80811	0.977063	45	7.64516	0.984601	45	4.83855	1.00902	45	4.97251	1.00124	45	4.54347	1.04645	45	6.80684	1.00693	45	4.41595
Q9H4M9	EH domain-containing protein 1	EHD1	EH domain-containing protein 1 OS=Homo sapiens OX=9606 GN=EHD1 PE=1 SV=2 - [EHD1_HUMAN]	39.33	18	20	34	534	60.5887	6.82959	0.936847	24	7.69027	0.940797	24	7.62158	0.961344	24	5.08857	0.981245	24	9.35065	1.07009	24	8.74346	1.07985	24	5.82722
P51572	B-cell receptor-associated protein 31	BCAP31	B-cell receptor-associated protein 31 OS=Homo sapiens OX=9606 GN=BCAP31 PE=1 SV=3 - [BAP31_HUMAN]	43.09	15	15	69	246	27.974	8.44092	1.06056	69	6.83265	0.907185	69	6.4705	0.915221	69	6.00306	1.21292	69	8.027	0.979055	69	6.86475	0.94381	69	7.10773
Q02878	60S ribosomal protein L6	RPL6	60S ribosomal protein L6 OS=Homo sapiens OX=9606 GN=RPL6 PE=1 SV=3 - [RL6_HUMAN]	47.22	18	18	72	288	32.7076	10.5796	1.0202	72	8.33029	1.01121	72	5.3605	1.01756	72	6.26729	1.01374	72	5.40107	0.993149	72	5.67273	0.959916	72	6.82238
P15428	15-hydroxyprostaglandin dehydrogenase [NAD(+)]	HPGD	15-hydroxyprostaglandin dehydrogenase [NAD(+)] OS=Homo sapiens OX=9606 GN=HPGD PE=1 SV=1 - [PGDH_HUMAN]	41.73	10	10	26	266	28.9589	5.85889	1.0403	26	9.37963	1.08106	26	3.76133	1.10352	26	7.37668	0.842836	26	14.6621	0.939203	26	7.867	1.03568	26	9.74285
O14979	Heterogeneous nuclear ribonucleoprotein D-like	HNRNPDL	Heterogeneous nuclear ribonucleoprotein D-like OS=Homo sapiens OX=9606 GN=HNRNPDL PE=1 SV=3 - [HNRDL_HUMAN]	24.05	8	9	25	420	46.4091	9.56885	1.08531	18	6.99075	1.08574	18	4.60544	1.0617	18	2.89416	1.02111	18	4.00084	0.90935	18	4.59994	0.894631	18	6.05028
P61160	Actin-related protein 2	ACTR2	Actin-related protein 2 OS=Homo sapiens OX=9606 GN=ACTR2 PE=1 SV=1 - [ARP2_HUMAN]	33.5	12	13	67	394	44.7322	6.7417	0.99847	33	8.58467	0.962623	33	4.06492	0.996843	33	3.07805	0.956916	33	4.95409	1.04345	33	6.29614	1.02631	33	5.11201
O00629	Importin subunit alpha-3	KPNA4	Importin subunit alpha-3 OS=Homo sapiens OX=9606 GN=KPNA4 PE=1 SV=1 - [IMA3_HUMAN]	29.94	7	11	19	521	57.8506	4.95752	0.959261	13	10.6458	1.00269	13	4.27394	0.965399	13	8.16437	1.04334	13	2.53039	0.993209	13	9.71077	1.04202	13	8.65104
P35270	Sepiapterin reductase	SPR	Sepiapterin reductase OS=Homo sapiens OX=9606 GN=SPR PE=1 SV=1 - [SPRE_HUMAN]	50.96	11	11	20	261	28.0308	8.04541	1.07315	20	6.65081	1.00678	20	6.03506	1.05261	20	4.0151	0.960971	20	5.82668	0.964702	20	4.6141	0.968211	20	9.16303
O94826	Mitochondrial import receptor subunit TOM70	TOMM70	Mitochondrial import receptor subunit TOM70 OS=Homo sapiens OX=9606 GN=TOMM70 PE=1 SV=1 - [TOM70_HUMAN]	34.21	20	20	48	608	67.412	7.12256	0.99164	48	7.53568	0.935624	48	6.07999	0.950383	48	5.63637	1.10763	48	7.44878	1.01337	48	8.22921	0.981959	48	6.53835
P42765	3-ketoacyl-CoA thiolase, mitochondrial	ACAA2	3-ketoacyl-CoA thiolase, mitochondrial OS=Homo sapiens OX=9606 GN=ACAA2 PE=1 SV=2 - [THIM_HUMAN]	40.81	11	11	17	397	41.8976	8.08936	0.893644	17	11.8584	0.854676	17	7.4547	0.866312	17	7.07157	1.20058	17	6.21141	1.09984	17	6.18857	1.02669	17	8.06678
O76094	Signal recognition particle subunit SRP72	SRP72	Signal recognition particle subunit SRP72 OS=Homo sapiens OX=9606 GN=SRP72 PE=1 SV=3 - [SRP72_HUMAN]	32.64	20	20	33	671	74.56	9.26123	0.968896	33	5.69821	0.973287	33	4.93695	0.993663	33	4.27978	1.00149	33	5.61156	1.04437	33	7.34149	1.03428	33	6.02934
O43175	D-3-phosphoglycerate dehydrogenase	PHGDH	D-3-phosphoglycerate dehydrogenase OS=Homo sapiens OX=9606 GN=PHGDH PE=1 SV=4 - [SERA_HUMAN]	31.71	13	13	24	533	56.6144	6.7124	0.974945	24	10.5469	1.00426	24	4.87332	1.03154	24	5.85823	0.935913	24	10.884	1.00928	24	7.65974	1.03241	24	5.62102
Q01650	Large neutral amino acids transporter small subunit 1	SLC7A5	Large neutral amino acids transporter small subunit 1 OS=Homo sapiens OX=9606 GN=SLC7A5 PE=1 SV=2 - [LAT1_HUMAN]	15.58	7	8	20	507	54.9743	7.72314	0.840031	18	9.56774	0.931966	18	6.8929	0.94798	18	9.54817	1.04539	18	11.9128	1.0743	18	12.4085	1.09335	18	5.01086
O43570	Carbonic anhydrase 12	CA12	Carbonic anhydrase 12 OS=Homo sapiens OX=9606 GN=CA12 PE=1 SV=1 - [CAH12_HUMAN]	33.33	8	8	20	354	39.426	7.2251	1.06011	20	10.6315	0.898888	20	3.72811	0.902384	20	4.31231	1.27363	20	9.68271	0.963885	20	7.6002	0.889944	20	7.9381
P68431	Histone H3.1	HIST1H3A	Histone H3.1 OS=Homo sapiens OX=9606 GN=HIST1H3A PE=1 SV=2 - [H31_HUMAN]	55.15	1	10	79	136	15.3945	11.1216	0.893394	6	4.29439	1.02584	6	3.27913	1.0295	6	10.1327	1.01255	6	6.12173	0.963113	6	2.33288	1.0491	6	1.60387
P26599	Polypyrimidine tract-binding protein 1	PTBP1	Polypyrimidine tract-binding protein 1 OS=Homo sapiens OX=9606 GN=PTBP1 PE=1 SV=1 - [PTBP1_HUMAN]	32.2	10	14	29	531	57.1856	9.17334	0.970009	19	9.82657	1.02079	19	2.28064	0.999287	19	4.46164	1.02409	19	5.25067	1.04018	19	5.74764	1.01314	19	6.51271
O95782	AP-2 complex subunit alpha-1	AP2A1	AP-2 complex subunit alpha-1 OS=Homo sapiens OX=9606 GN=AP2A1 PE=1 SV=3 - [AP2A1_HUMAN]	38.79	22	34	56	977	107.478	7.03467	0.97678	31	4.62827	0.965574	31	7.77374	0.980843	31	3.22327	1.01381	31	7.43077	1.01796	31	5.69435	1.0135	31	7.87423
O15173	Membrane-associated progesterone receptor component 2	PGRMC2	Membrane-associated progesterone receptor component 2 OS=Homo sapiens OX=9606 GN=PGRMC2 PE=1 SV=1 - [PGRC2_HUMAN]	42.6	7	9	23	223	23.8037	4.88135	1.0502	17	6.44421	1.00602	17	7.41273	0.965975	17	7.4141	1.09906	17	9.22253	0.942573	17	7.88564	0.910437	17	7.25526
P61019	Ras-related protein Rab-2A	RAB2A	Ras-related protein Rab-2A OS=Homo sapiens OX=9606 GN=RAB2A PE=1 SV=1 - [RAB2A_HUMAN]	56.13	10	10	30	212	23.5308	6.53662	0.933062	30	9.66412	0.930699	30	5.44599	0.916968	30	6.12685	1.09387	30	5.97984	1.02453	30	5.90071	1.06345	30	9.22653
Q9BXJ9	N-alpha-acetyltransferase 15, NatA auxiliary subunit	NAA15	N-alpha-acetyltransferase 15, NatA auxiliary subunit OS=Homo sapiens OX=9606 GN=NAA15 PE=1 SV=1 - [NAA15_HUMAN]	32.56	23	31	57	866	101.208	7.41553	0.996911	43	10.5752	0.999979	43	6.30937	1.0165	43	3.60117	0.94573	43	7.48547	1.014	43	6.42676	1.01761	43	7.5443
P54577	Tyrosine--tRNA ligase, cytoplasmic	YARS	Tyrosine--tRNA ligase, cytoplasmic OS=Homo sapiens OX=9606 GN=YARS PE=1 SV=4 - [SYYC_HUMAN]	47.54	25	25	52	528	59.1061	7.04932	0.950249	52	9.64313	0.97616	52	3.48191	1.01279	52	6.52183	0.974422	52	8.65895	1.02371	52	6.27375	1.06028	52	4.97086
P33316	Deoxyuridine 5'-triphosphate nucleotidohydrolase, mitochondrial	DUT	Deoxyuridine 5'-triphosphate nucleotidohydrolase, mitochondrial OS=Homo sapiens OX=9606 GN=DUT PE=1 SV=4 - [DUT_HUMAN]	37.3	7	7	17	252	26.5466	9.36377	1.26487	17	8.038	1.28536	17	5.02635	1.22401	17	5.38296	0.772352	17	15.27	0.797883	17	6.23972	0.807137	17	11.9817
P68400	Casein kinase II subunit alpha	CSNK2A1	Casein kinase II subunit alpha OS=Homo sapiens OX=9606 GN=CSNK2A1 PE=1 SV=1 - [CSK21_HUMAN]	38.87	12	13	31	391	45.1148	7.73779	0.982844	30	5.34706	0.979224	30	4.38687	1.01462	30	4.35083	0.986009	30	6.51921	1.02842	30	6.83585	1.02918	30	4.49372
Q15185	Prostaglandin E synthase 3	PTGES3	Prostaglandin E synthase 3 OS=Homo sapiens OX=9606 GN=PTGES3 PE=1 SV=1 - [TEBP_HUMAN]	48.13	8	8	28	160	18.6854	4.53857	1.16324	28	9.61155	1.06106	28	8.16342	1.07441	28	5.00025	0.85553	28	8.17435	0.91534	28	8.83993	0.994254	28	4.64475
P07954	Fumarate hydratase, mitochondrial	FH	Fumarate hydratase, mitochondrial OS=Homo sapiens OX=9606 GN=FH PE=1 SV=3 - [FUMH_HUMAN]	37.25	17	17	37	510	54.6022	8.76318	1.02415	37	7.72381	0.973224	37	4.78192	1.00608	37	4.16748	1.05165	37	6.04027	0.986044	37	5.61269	0.969438	37	6.40032
P0C0S5	Histone H2A.Z	H2AFZ	Histone H2A.Z OS=Homo sapiens OX=9606 GN=H2AFZ PE=1 SV=2 - [H2AZ_HUMAN]	31.25	2	4	36	128	13.5446	10.5796	0.938297	14	19.1746	1.02774	14	6.4827	1.00556	14	3.31944	1.06816	14	4.16228	1.04098	14	14.7904	0.900349	14	10.6671
P17980	26S proteasome regulatory subunit 6A	PSMC3	26S proteasome regulatory subunit 6A OS=Homo sapiens OX=9606 GN=PSMC3 PE=1 SV=3 - [PRS6A_HUMAN]	54.44	21	21	46	439	49.1725	5.23682	1.00594	46	4.7218	1.00563	46	6.02382	1.04107	46	5.20944	0.946843	46	8.71029	1.03883	46	5.22725	0.978488	46	7.51048
P00441	Superoxide dismutase [Cu-Zn]	SOD1	Superoxide dismutase [Cu-Zn] OS=Homo sapiens OX=9606 GN=SOD1 PE=1 SV=2 - [SODC_HUMAN]	88.96	13	13	35	154	15.9259	6.12549	1.04473	35	9.14056	1.01688	35	5.73811	1.03503	35	6.52525	0.940194	35	9.27149	0.944053	35	9.77523	0.986291	35	4.52702
Q8NE71	ATP-binding cassette sub-family F member 1	ABCF1	ATP-binding cassette sub-family F member 1 OS=Homo sapiens OX=9606 GN=ABCF1 PE=1 SV=2 - [ABCF1_HUMAN]	26.04	16	18	32	845	95.8665	6.80029	0.983085	30	12.3033	1.0464	30	5.50379	1.02144	30	9.85504	0.94898	30	7.20196	0.993201	30	8.72126	1.02895	30	7.05043
Q04837	Single-stranded DNA-binding protein, mitochondrial	SSBP1	Single-stranded DNA-binding protein, mitochondrial OS=Homo sapiens OX=9606 GN=SSBP1 PE=1 SV=1 - [SSBP_HUMAN]	39.19	5	5	27	148	17.249	9.59814	0.943425	27	5.26033	0.867266	27	8.53184	0.840906	27	9.44169	1.21836	27	11.1967	1.05211	27	7.42053	1.00914	27	4.13351
Q9BZZ5	Apoptosis inhibitor 5	API5	Apoptosis inhibitor 5 OS=Homo sapiens OX=9606 GN=API5 PE=1 SV=3 - [API5_HUMAN]	31.11	17	17	32	524	58.9679	7.34229	1.0263	32	8.34616	1.01897	32	9.38424	1.04579	32	7.05665	0.995536	32	9.12112	0.97193	32	6.4104	0.966526	32	11.1026
Q9Y3I0	tRNA-splicing ligase RtcB homolog	RTCB	tRNA-splicing ligase RtcB homolog OS=Homo sapiens OX=9606 GN=RTCB PE=1 SV=1 - [RTCB_HUMAN]	43.37	19	19	42	505	55.1749	7.2251	0.990322	42	6.65925	0.995124	42	2.80747	1.02487	42	4.60604	0.995976	42	5.38612	1.01998	42	5.31779	0.997839	42	4.37458
Q9Y266	Nuclear migration protein nudC	NUDC	Nuclear migration protein nudC OS=Homo sapiens OX=9606 GN=NUDC PE=1 SV=1 - [NUDC_HUMAN]	48.94	16	17	57	331	38.2191	5.37646	1.03482	52	5.72302	1.02161	52	3.93591	1.06959	52	4.43732	0.901431	52	7.71444	1.00564	52	5.48703	1.02944	52	5.33166
Q9Y4G6	Talin-2	TLN2	Talin-2 OS=Homo sapiens OX=9606 GN=TLN2 PE=1 SV=4 - [TLN2_HUMAN]	6.96	4	20	46	2542	271.443	5.56689	1.02078	4	10.6256	0.985738	4	13.046	1.0046	4	9.89345	0.927333	4	16.3229	0.986778	4	3.41922	1.07434	4	13.5292
Q16698	2,4-dienoyl-CoA reductase, mitochondrial	DECR1	2,4-dienoyl-CoA reductase, mitochondrial OS=Homo sapiens OX=9606 GN=DECR1 PE=1 SV=1 - [DECR_HUMAN]	40.6	13	13	26	335	36.0448	9.27588	1.00531	26	8.32115	0.962978	26	4.14692	0.983625	26	5.68856	1.12789	26	10.6401	0.975636	26	7.51065	0.968345	26	8.3094
Q99729	Heterogeneous nuclear ribonucleoprotein A/B	HNRNPAB	Heterogeneous nuclear ribonucleoprotein A/B OS=Homo sapiens OX=9606 GN=HNRNPAB PE=1 SV=2 - [ROAA_HUMAN]	28.31	8	10	31	332	36.2024	8.20654	1.01989	21	5.47017	0.966816	21	2.95696	0.973826	21	3.79314	1.04958	21	6.6264	1.03916	21	4.08743	0.965261	21	5.03262
P62263	40S ribosomal protein S14	RPS14	40S ribosomal protein S14 OS=Homo sapiens OX=9606 GN=RPS14 PE=1 SV=3 - [RS14_HUMAN]	37.75	6	6	32	151	16.2625	10.0522	1.02365	32	9.74493	0.97063	32	7.62548	0.996563	32	7.21552	0.97168	32	11.7731	1.06359	32	14.4911	0.977651	32	6.82418
Q15907	Ras-related protein Rab-11B	RAB11B	Ras-related protein Rab-11B OS=Homo sapiens OX=9606 GN=RAB11B PE=1 SV=4 - [RB11B_HUMAN]	57.8	1	14	38	218	24.4735	5.93506	0.901367	1		1.01447	1		0.950704	1		1.17695	1		0.950094	1		1.02618	1
P23634	Plasma membrane calcium-transporting ATPase 4	ATP2B4	Plasma membrane calcium-transporting ATPase 4 OS=Homo sapiens OX=9606 GN=ATP2B4 PE=1 SV=2 - [AT2B4_HUMAN]	15.71	8	17	26	1241	137.833	6.59521	0.898078	10	9.4252	0.944589	10	15.0771	0.861541	10	9.19071	1.20223	10	14.4544	1.05701	10	9.30115	1.04254	10	8.05537
P78347	General transcription factor II-I	GTF2I	General transcription factor II-I OS=Homo sapiens OX=9606 GN=GTF2I PE=1 SV=2 - [GTF2I_HUMAN]	29.36	29	29	53	998	112.346	6.39209	1.11873	53	8.03889	1.12967	53	7.86762	1.12087	53	6.3528	0.901923	53	8.10978	0.904627	53	10.4982	0.898203	53	9.07502
Q13428	Treacle protein	TCOF1	Treacle protein OS=Homo sapiens OX=9606 GN=TCOF1 PE=1 SV=3 - [TCOF_HUMAN]	23.79	33	33	50	1488	152.015	9.0415	0.979497	49	6.67693	1.0101	49	5.02969	1.0241	49	7.59613	1.004	49	13.6998	0.977281	49	8.20473	1.03568	49	7.11752
P38606	V-type proton ATPase catalytic subunit A	ATP6V1A	V-type proton ATPase catalytic subunit A OS=Homo sapiens OX=9606 GN=ATP6V1A PE=1 SV=2 - [VATA_HUMAN]	27.07	16	16	36	617	68.2605	5.51611	0.974961	36	6.61272	0.970245	36	7.29307	0.991481	36	3.38412	1.01758	36	4.33534	1.03692	36	4.58572	1.01019	36	5.09341
Q16630	Cleavage and polyadenylation specificity factor subunit 6	CPSF6	Cleavage and polyadenylation specificity factor subunit 6 OS=Homo sapiens OX=9606 GN=CPSF6 PE=1 SV=2 - [CPSF6_HUMAN]	27.77	12	12	24	551	59.1734	7.15186	0.989867	24	6.87007	1.01649	24	6.54549	1.01377	24	4.91349	0.978882	24	7.6847	1.01739	24	6.2692	0.98567	24	4.25238
Q9H0D6	5'-3' exoribonuclease 2	XRN2	5'-3' exoribonuclease 2 OS=Homo sapiens OX=9606 GN=XRN2 PE=1 SV=1 - [XRN2_HUMAN]	26.11	20	20	37	950	108.513	7.47412	1.05026	37	11.8565	1.02869	37	4.49606	1.05708	37	4.30823	0.963557	37	6.6162	0.994573	37	12.7548	0.972058	37	7.04844
P51659	Peroxisomal multifunctional enzyme type 2	HSD17B4	Peroxisomal multifunctional enzyme type 2 OS=Homo sapiens OX=9606 GN=HSD17B4 PE=1 SV=3 - [DHB4_HUMAN]	41.85	27	27	47	736	79.6363	8.83643	1.01327	47	10.7263	0.972897	47	4.67562	0.987902	47	6.64022	1.09073	47	10.5144	0.976097	47	9.14584	0.965803	47	8.05214
P41250	Glycine--tRNA ligase	GARS	Glycine--tRNA ligase OS=Homo sapiens OX=9606 GN=GARS PE=1 SV=3 - [GARS_HUMAN]	27.6	21	22	57	739	83.1126	7.03467	0.91752	55	9.87699	0.940734	55	5.48239	0.975718	55	3.84652	0.991368	55	6.76374	1.035	55	7.62754	1.09236	55	5.96649
Q9NVP1	ATP-dependent RNA helicase DDX18	DDX18	ATP-dependent RNA helicase DDX18 OS=Homo sapiens OX=9606 GN=DDX18 PE=1 SV=2 - [DDX18_HUMAN]	29.1	19	19	46	670	75.3594	9.49561	1.04702	46	7.28281	0.980722	46	4.61233	1.00706	46	4.53772	1.04168	46	9.27957	0.997902	46	4.98298	0.954682	46	7.09562
P08621	U1 small nuclear ribonucleoprotein 70 kDa	SNRNP70	U1 small nuclear ribonucleoprotein 70 kDa OS=Homo sapiens OX=9606 GN=SNRNP70 PE=1 SV=2 - [RU17_HUMAN]	36.38	15	15	39	437	51.5258	9.93506	1.04634	39	4.39431	1.01451	39	4.63887	1.02536	39	3.52986	0.995447	39	4.8649	0.991646	39	6.93128	0.978035	39	5.05519
P20073	Annexin A7	ANXA7	Annexin A7 OS=Homo sapiens OX=9606 GN=ANXA7 PE=1 SV=3 - [ANXA7_HUMAN]	33.2	14	15	24	488	52.7058	5.68115	1.01734	23	5.0261	1.04494	23	3.76625	1.06305	23	5.39855	0.884757	23	10.105	1.01303	23	5.5108	1.0164	23	7.37138
Q14839	Chromodomain-helicase-DNA-binding protein 4	CHD4	Chromodomain-helicase-DNA-binding protein 4 OS=Homo sapiens OX=9606 GN=CHD4 PE=1 SV=2 - [CHD4_HUMAN]	19.46	22	28	38	1912	217.867	5.85889	1.06904	29	11.2821	1.07118	30	7.59857	1.07326	29	5.56054	0.957866	29	5.31894	0.973544	30	10.5957	0.952278	30	10.1497
Q96PK6	RNA-binding protein 14	RBM14	RNA-binding protein 14 OS=Homo sapiens OX=9606 GN=RBM14 PE=1 SV=2 - [RBM14_HUMAN]	32.14	20	20	48	669	69.4489	9.67139	0.927312	48	9.44697	0.95623	48	5.56149	0.98348	48	6.36003	0.992567	48	10.5067	1.06419	48	7.25751	1.06947	48	8.40072
P84085	ADP-ribosylation factor 5	ARF5	ADP-ribosylation factor 5 OS=Homo sapiens OX=9606 GN=ARF5 PE=1 SV=2 - [ARF5_HUMAN]	62.78	4	9	21	180	20.5166	6.78564	1.09872	12	7.34595	1.03943	12	3.7765	1.04989	12	4.2738	0.866174	12	6.18912	0.999523	12	4.64341	0.979197	12	3.19492
Q15424	Scaffold attachment factor B1	SAFB	Scaffold attachment factor B1 OS=Homo sapiens OX=9606 GN=SAFB PE=1 SV=4 - [SAFB1_HUMAN]	26.89	18	25	50	915	102.58	5.46533	1.05138	35	6.49204	1.02511	35	3.80644	1.0441	35	4.2699	1.00315	35	8.5098	0.997112	35	7.89754	0.958883	35	5.12346
P35268	60S ribosomal protein L22	RPL22	60S ribosomal protein L22 OS=Homo sapiens OX=9606 GN=RPL22 PE=1 SV=2 - [RL22_HUMAN]	30.47	3	3	11	128	14.7778	9.18799	1.05177	11	3.89364	0.932238	11	5.25969	0.942713	11	2.10058	1.04909	11	4.25653	1.01247	11	2.70086	1.04028	11	4.97193
P49821	NADH dehydrogenase [ubiquinone] flavoprotein 1, mitochondrial	NDUFV1	NADH dehydrogenase [ubiquinone] flavoprotein 1, mitochondrial OS=Homo sapiens OX=9606 GN=NDUFV1 PE=1 SV=4 - [NDUV1_HUMAN]	27.16	11	11	28	464	50.7848	8.20654	0.988541	28	7.36831	0.911899	28	9.24233	0.955068	28	5.34009	1.05623	28	9.56531	1.04991	28	6.97194	0.996333	28	5.11112
P43304	Glycerol-3-phosphate dehydrogenase, mitochondrial	GPD2	Glycerol-3-phosphate dehydrogenase, mitochondrial OS=Homo sapiens OX=9606 GN=GPD2 PE=1 SV=3 - [GPDM_HUMAN]	28.61	20	20	34	727	80.8016	7.69385	0.975201	34	4.35878	0.909998	34	4.01534	0.926417	34	4.31388	1.16628	34	7.83549	1.03533	34	4.51879	0.991788	34	5.28902
Q92522	Histone H1x	H1FX	Histone H1x OS=Homo sapiens OX=9606 GN=H1FX PE=1 SV=1 - [H1X_HUMAN]	43.66	9	9	25	213	22.4735	10.7554	1.04456	25	9.59884	1.03444	25	4.93758	1.01901	25	3.18525	1.02444	25	6.34031	0.944694	25	5.87317	0.974425	25	8.60069
P14735	Insulin-degrading enzyme	IDE	Insulin-degrading enzyme OS=Homo sapiens OX=9606 GN=IDE PE=1 SV=4 - [IDE_HUMAN]	17.47	17	17	35	1019	117.893	6.60986	0.999099	35	5.20935	1.04461	35	3.82289	1.08412	35	5.77119	0.888719	35	7.32788	0.966165	35	8.51502	1.03002	35	5.2943
P46063	ATP-dependent DNA helicase Q1	RECQL	ATP-dependent DNA helicase Q1 OS=Homo sapiens OX=9606 GN=RECQL PE=1 SV=3 - [RECQ1_HUMAN]	37.29	23	23	36	649	73.41	7.88428	1.01029	36	7.95074	0.993831	36	5.10592	1.03077	36	3.39576	0.959571	36	6.88131	1.01313	36	8.7716	1.02796	36	9.63745
Q9Y224	RNA transcription, translation and transport factor protein	RTRAF	RNA transcription, translation and transport factor protein OS=Homo sapiens OX=9606 GN=RTRAF PE=1 SV=1 - [RTRAF_HUMAN]	65.57	17	17	48	244	28.0507	6.65381	0.992128	48	7.88855	0.994948	48	4.34313	0.998468	48	5.7282	1.00117	48	7.9503	1.01163	48	6.8644	1.00098	48	4.68488
P62829	60S ribosomal protein L23	RPL23	60S ribosomal protein L23 OS=Homo sapiens OX=9606 GN=RPL23 PE=1 SV=1 - [RL23_HUMAN]	63.57	9	9	22	140	14.8561	10.5063	1.03645	22	9.93097	1.02599	22	8.36561	1.00005	22	6.57234	1.00813	22	7.75484	0.963907	22	7.14858	0.966135	22	9.05064
P07858	Cathepsin B	CTSB	Cathepsin B OS=Homo sapiens OX=9606 GN=CTSB PE=1 SV=3 - [CATB_HUMAN]	23.6	6	6	27	339	37.7968	6.30322	1.08388	27	13.4554	0.945985	27	5.44764	0.961158	27	4.75044	1.23259	27	10.152	0.944885	27	11.2193	0.864837	27	9.18474
P38159	RNA-binding motif protein, X chromosome	RBMX	RNA-binding motif protein, X chromosome OS=Homo sapiens OX=9606 GN=RBMX PE=1 SV=3 - [RBMX_HUMAN]	47.57	21	21	42	391	42.3063	10.0522	1.00766	42	6.24443	0.983288	42	5.07099	1.00364	42	3.92664	1.02007	42	4.67913	1.0201	42	5.14876	0.983499	42	5.34007
Q9UL46	Proteasome activator complex subunit 2	PSME2	Proteasome activator complex subunit 2 OS=Homo sapiens OX=9606 GN=PSME2 PE=1 SV=4 - [PSME2_HUMAN]	38.91	11	11	27	239	27.3843	5.73193	1.02269	27	13.0069	1.00967	27	4.79135	1.01759	27	7.20753	1.01952	27	9.98047	0.923256	27	13.8434	1.00286	27	12.4689
P11177	Pyruvate dehydrogenase E1 component subunit beta, mitochondrial	PDHB	Pyruvate dehydrogenase E1 component subunit beta, mitochondrial OS=Homo sapiens OX=9606 GN=PDHB PE=1 SV=3 - [ODPB_HUMAN]	37.6	11	11	28	359	39.208	6.65381	0.995994	28	9.00605	0.916133	28	6.31082	0.911287	28	6.0473	1.16918	28	7.56312	1.02825	28	5.77638	0.944765	28	4.94129
Q07866	Kinesin light chain 1	KLC1	Kinesin light chain 1 OS=Homo sapiens OX=9606 GN=KLC1 PE=1 SV=2 - [KLC1_HUMAN]	39.44	16	22	41	573	65.2689	6.20166	0.965117	34	7.35201	1.00329	34	4.66787	1.01262	34	5.77127	0.915665	34	4.6565	1.03433	34	6.64168	1.05179	34	5.04877
Q9Y5S2	Serine/threonine-protein kinase MRCK beta	CDC42BPB	Serine/threonine-protein kinase MRCK beta OS=Homo sapiens OX=9606 GN=CDC42BPB PE=1 SV=2 - [MRCKB_HUMAN]	17.77	24	32	45	1711	194.193	6.3667	0.976306	35	6.76258	1	35	5.00887	1.01083	35	5.3234	0.970681	35	8.48783	1.05194	35	9.0362	1.01334	35	5.3711
Q08J23	tRNA (cytosine(34)-C(5))-methyltransferase	NSUN2	tRNA (cytosine(34)-C(5))-methyltransferase OS=Homo sapiens OX=9606 GN=NSUN2 PE=1 SV=2 - [NSUN2_HUMAN]	39.24	25	25	36	767	86.4158	6.771	0.992125	36	8.80053	0.998523	36	7.24891	0.998111	36	4.7183	0.984708	36	5.99997	1.0135	36	5.68749	1.01861	36	4.44226
Q15393	Splicing factor 3B subunit 3	SF3B3	Splicing factor 3B subunit 3 OS=Homo sapiens OX=9606 GN=SF3B3 PE=1 SV=4 - [SF3B3_HUMAN]	20.95	22	23	43	1217	135.492	5.26221	0.97919	41	8.22602	0.970214	41	7.29376	1.01216	41	6.17894	0.985704	41	11.573	1.0386	41	6.84719	1.011	41	8.20916
O60313	Dynamin-like 120 kDa protein, mitochondrial	OPA1	Dynamin-like 120 kDa protein, mitochondrial OS=Homo sapiens OX=9606 GN=OPA1 PE=1 SV=3 - [OPA1_HUMAN]	25.52	23	23	35	960	111.561	7.86963	0.987377	35	4.62738	0.951326	35	7.32401	0.945103	35	4.86405	1.10098	35	7.11493	1.04267	35	3.89946	1.00028	35	6.65921
Q8TAT6	Nuclear protein localization protein 4 homolog	NPLOC4	Nuclear protein localization protein 4 homolog OS=Homo sapiens OX=9606 GN=NPLOC4 PE=1 SV=3 - [NPL4_HUMAN]	35.53	19	19	30	608	68.0769	6.37939	0.980905	28	5.62656	1.00494	28	6.05154	1.00796	28	6.62326	0.985484	28	8.87805	1.00102	28	9.07252	1.03931	28	4.43545
P19013	Keratin, type II cytoskeletal 4	KRT4	Keratin, type II cytoskeletal 4 OS=Homo sapiens OX=9606 GN=KRT4 PE=1 SV=4 - [K2C4_HUMAN]	15.92	3	10	49	534	57.2498	6.60986	1.03758	3	9.06095	1.02387	3	5.14669	1.01801	3	3.94496	0.895811	3	10.8148	0.982883	3	0.500446	0.979919	3	0.651132
P38919	Eukaryotic initiation factor 4A-III	EIF4A3	Eukaryotic initiation factor 4A-III OS=Homo sapiens OX=9606 GN=EIF4A3 PE=1 SV=4 - [IF4A3_HUMAN]	36.25	14	17	43	411	46.8412	6.72705	0.973493	33	13.8114	0.999258	33	5.98171	1.01045	33	5.97537	0.979306	33	10.3555	1.01476	33	7.51635	1.01587	33	7.71564
P29317	Ephrin type-A receptor 2	EPHA2	Ephrin type-A receptor 2 OS=Homo sapiens OX=9606 GN=EPHA2 PE=1 SV=2 - [EPHA2_HUMAN]	25.31	18	21	29	976	108.197	6.22705	0.800166	25	10.4451	0.821094	25	8.40261	0.793019	25	15.9273	1.23233	25	13.3909	1.18321	25	6.51149	1.13627	25	5.66171
P12268	Inosine-5'-monophosphate dehydrogenase 2	IMPDH2	Inosine-5'-monophosphate dehydrogenase 2 OS=Homo sapiens OX=9606 GN=IMPDH2 PE=1 SV=2 - [IMDH2_HUMAN]	40.47	17	19	39	514	55.7696	6.90283	0.937478	35	8.87592	0.96984	35	6.63084	1.00618	35	5.76979	0.969159	35	8.29971	1.04508	35	7.46728	1.0273	35	7.40284
Q15436	Protein transport protein Sec23A	SEC23A	Protein transport protein Sec23A OS=Homo sapiens OX=9606 GN=SEC23A PE=1 SV=2 - [SC23A_HUMAN]	25.23	14	16	28	765	86.1053	7.07861	1.0022	23	6.39087	0.987068	23	4.71422	1.00326	23	7.70762	0.985209	23	6.61989	0.998156	23	9.88731	1.01818	23	4.52872
P62318	Small nuclear ribonucleoprotein Sm D3	SNRPD3	Small nuclear ribonucleoprotein Sm D3 OS=Homo sapiens OX=9606 GN=SNRPD3 PE=1 SV=1 - [SMD3_HUMAN]	47.62	4	4	16	126	13.9073	10.3159	1.03883	16	7.16228	1.01979	16	5.39579	1.00146	16	4.31339	1.04466	16	3.84798	0.985374	16	6.51622	0.952426	16	4.50248
O60656	UDP-glucuronosyltransferase 1-9	UGT1A9	UDP-glucuronosyltransferase 1-9 OS=Homo sapiens OX=9606 GN=UGT1A9 PE=1 SV=1 - [UD19_HUMAN]	28.49	4	12	27	530	59.9015	7.89893	1.09042	7	8.52598	1.011	7	3.03036	0.997904	7	2.68593	1.05923	7	10.4296	0.972875	7	10.1821	0.981813	7	3.65239
Q9UQE7	Structural maintenance of chromosomes protein 3	SMC3	Structural maintenance of chromosomes protein 3 OS=Homo sapiens OX=9606 GN=SMC3 PE=1 SV=2 - [SMC3_HUMAN]	26.05	31	32	49	1217	141.454	7.18115	1.08596	48	8.75273	1.07195	48	6.67169	1.09095	48	6.17924	0.951982	48	8.39767	0.948115	48	8.66506	0.9075	48	6.89995
Q99541	Perilipin-2	PLIN2	Perilipin-2 OS=Homo sapiens OX=9606 GN=PLIN2 PE=1 SV=2 - [PLIN2_HUMAN]	46.68	18	18	29	437	48.0454	6.80029	0.801487	29	13.7469	0.752162	29	15.0092	0.744981	29	11.0412	1.35172	29	16.9969	1.11368	29	10.2441	1.1476	29	8.81838
Q14789	Golgin subfamily B member 1	GOLGB1	Golgin subfamily B member 1 OS=Homo sapiens OX=9606 GN=GOLGB1 PE=1 SV=2 - [GOGB1_HUMAN]	18.32	52	56	75	3259	375.79	4.99561	0.969966	68	6.36136	0.976278	68	8.5917	0.980087	68	6.81206	1.05707	68	7.96058	1.01116	68	5.99517	0.989924	68	5.6738
P62491	Ras-related protein Rab-11A	RAB11A	Ras-related protein Rab-11A OS=Homo sapiens OX=9606 GN=RAB11A PE=1 SV=3 - [RB11A_HUMAN]	65.74	1	14	40	216	24.3784	6.56592	0.999789	3	2.48326	0.895804	3	5.53517	0.904904	3	0.0288751	1.1314	3	2.40657	0.926285	3	2.87909	1.1199	3	3.01214
Q93099	Homogentisate 1,2-dioxygenase	HGD	Homogentisate 1,2-dioxygenase OS=Homo sapiens OX=9606 GN=HGD PE=1 SV=2 - [HGD_HUMAN]	29.44	11	11	19	445	49.9316	6.96143	1.03462	19	10.2987	1.10286	19	4.80866	1.13089	19	9.55659	0.849862	19	8.34024	0.917271	19	7.47159	1.00039	19	11.0355
Q9H2U2	Inorganic pyrophosphatase 2, mitochondrial	PPA2	Inorganic pyrophosphatase 2, mitochondrial OS=Homo sapiens OX=9606 GN=PPA2 PE=1 SV=2 - [IPYR2_HUMAN]	49.1	13	15	33	334	37.896	7.38623	1.03287	26	6.887	0.935056	26	5.73465	0.898705	26	5.73431	1.24298	27	6.59704	0.984285	26	7.89678	0.946574	27	7.06308
O43823	A-kinase anchor protein 8	AKAP8	A-kinase anchor protein 8 OS=Homo sapiens OX=9606 GN=AKAP8 PE=1 SV=1 - [AKAP8_HUMAN]	12.57	7	7	14	692	76.0611	5.14795	1.02315	14	13.0066	1.048	14	11.9769	1.02217	14	7.37635	0.969512	14	8.07989	1.02271	13	3.06445	0.994483	14	8.61589
P16144	Integrin beta-4	ITGB4	Integrin beta-4 OS=Homo sapiens OX=9606 GN=ITGB4 PE=1 SV=5 - [ITB4_HUMAN]	16.96	24	24	28	1822	202.039	6.0874	0.915515	28	7.25759	0.912682	28	10.7934	0.903805	28	9.95738	1.15054	28	12.5554	1.05708	28	5.17689	1.04275	28	5.48793
P62888	60S ribosomal protein L30	RPL30	60S ribosomal protein L30 OS=Homo sapiens OX=9606 GN=RPL30 PE=1 SV=2 - [RL30_HUMAN]	76.52	8	9	33	115	12.7757	9.62744	1.02241	31	9.32927	0.991094	31	4.83999	0.98723	31	6.32058	1.04143	31	6.53937	0.948233	31	12.3586	0.986103	31	5.52061
O75477	Erlin-1	ERLIN1	Erlin-1 OS=Homo sapiens OX=9606 GN=ERLIN1 PE=1 SV=2 - [ERLN1_HUMAN]	31.32	9	13	32	348	39.1464	7.86963	1.04784	22	6.00512	1.00445	22	3.09964	0.964178	22	4.41899	1.13245	22	9.48824	1.01095	22	4.21155	0.929113	22	6.46545
P67775	Serine/threonine-protein phosphatase 2A catalytic subunit alpha isoform	PPP2CA	Serine/threonine-protein phosphatase 2A catalytic subunit alpha isoform OS=Homo sapiens OX=9606 GN=PPP2CA PE=1 SV=1 - [PP2AA_HUMAN]	51.13	2	13	25	309	35.5714	5.5415	1.08885	4	4.24349	1.07545	4	0.676139	1.07562	4	4.92334	0.9031	4	2.9977	0.95193	4	4.26005	0.953972	4	6.55812
P42166	Lamina-associated polypeptide 2, isoform alpha	TMPO	Lamina-associated polypeptide 2, isoform alpha OS=Homo sapiens OX=9606 GN=TMPO PE=1 SV=2 - [LAP2A_HUMAN]	32.28	12	19	35	694	75.4456	7.66455	1.05459	16	8.94038	1.17724	16	11.3671	1.11329	16	7.74873	0.879452	16	10.9109	0.878078	16	7.94335	0.962408	16	7.84837
Q9P035	Very-long-chain (3R)-3-hydroxyacyl-CoA dehydratase 3	HACD3	Very-long-chain (3R)-3-hydroxyacyl-CoA dehydratase 3 OS=Homo sapiens OX=9606 GN=HACD3 PE=1 SV=2 - [HACD3_HUMAN]	30.94	9	9	23	362	43.1316	8.93896	1.02982	23	7.23414	0.968434	23	7.05531	0.957395	23	4.32687	1.07983	23	8.96342	0.996857	23	6.45095	0.973354	23	8.18116
Q13151	Heterogeneous nuclear ribonucleoprotein A0	HNRNPA0	Heterogeneous nuclear ribonucleoprotein A0 OS=Homo sapiens OX=9606 GN=HNRNPA0 PE=1 SV=1 - [ROA0_HUMAN]	42.95	9	11	27	305	30.8218	9.29053	0.953336	16	6.40755	1.04726	16	6.87581	1.01733	16	3.86733	1.00363	16	5.65648	0.987209	16	4.47322	1.01116	16	4.12011
P62854	40S ribosomal protein S26	RPS26	40S ribosomal protein S26 OS=Homo sapiens OX=9606 GN=RPS26 PE=1 SV=3 - [RS26_HUMAN]	42.61	5	5	17	115	13.0071	11.0044	0.952568	17	3.42589	0.972181	17	7.90718	0.979025	17	3.12054	1.08269	17	10.7459	0.985833	17	14.749	1.06805	17	4.15494
P84243	Histone H3.3	H3F3A	Histone H3.3 OS=Homo sapiens OX=9606 GN=H3F3A PE=1 SV=2 - [H33_HUMAN]	55.15	3	10	76	136	15.3185	11.2681	1.02394	12	15.4821	1.01049	12	5.27183	0.958732	12	9.02412	1.05418	12	15.4674	0.897234	12	8.87573	0.987099	12	12.454
Q13740	CD166 antigen	ALCAM	CD166 antigen OS=Homo sapiens OX=9606 GN=ALCAM PE=1 SV=2 - [CD166_HUMAN]	27.96	17	17	32	583	65.0611	6.25244	1.14282	32	8.92184	1.02608	32	6.18615	1.01751	32	6.37995	1.05043	32	7.35816	0.917907	32	10.8575	0.877674	32	5.75334
P13798	Acylamino-acid-releasing enzyme	APEH	Acylamino-acid-releasing enzyme OS=Homo sapiens OX=9606 GN=APEH PE=1 SV=4 - [ACPH_HUMAN]	26.09	18	18	30	732	81.1726	5.47803	0.993975	29	7.53462	1.0056	29	3.95524	1.02493	29	4.85143	0.970269	29	7.93065	0.993133	29	4.33594	1.04031	29	5.73275
P62280	40S ribosomal protein S11	RPS11	40S ribosomal protein S11 OS=Homo sapiens OX=9606 GN=RPS11 PE=1 SV=3 - [RS11_HUMAN]	49.37	10	10	51	158	18.419	10.3013	1.02499	51	14.4672	1.02652	51	5.43962	1.02299	51	8.81615	0.954935	51	15.686	0.977987	51	10.3597	0.961032	51	9.75893
P10586	Receptor-type tyrosine-protein phosphatase F	PTPRF	Receptor-type tyrosine-protein phosphatase F OS=Homo sapiens OX=9606 GN=PTPRF PE=1 SV=2 - [PTPRF_HUMAN]	15.42	20	20	29	1907	212.744	6.30322	1.03706	28	7.39739	1.06643	28	8.38501	1.06183	28	5.92376	0.912453	28	11.3216	0.982759	28	4.22305	0.988156	28	5.91131
P00533	Epidermal growth factor receptor	EGFR	Epidermal growth factor receptor OS=Homo sapiens OX=9606 GN=EGFR PE=1 SV=2 - [EGFR_HUMAN]	24.71	26	27	34	1210	134.19	6.68311	0.943578	32	9.31639	0.927928	32	4.93094	0.926315	32	7.63302	1.07649	32	10.1781	1.08961	32	8.08343	1.03593	32	4.96261
Q14690	Protein RRP5 homolog	PDCD11	Protein RRP5 homolog OS=Homo sapiens OX=9606 GN=PDCD11 PE=1 SV=3 - [RRP5_HUMAN]	20.26	37	37	57	1871	208.57	8.86572	1.05154	56	5.86499	1.02702	56	6.28085	1.0641	56	4.98876	1.0283	56	7.72282	0.964179	56	5.45692	0.929401	56	6.28387
P61289	Proteasome activator complex subunit 3	PSME3	Proteasome activator complex subunit 3 OS=Homo sapiens OX=9606 GN=PSME3 PE=1 SV=1 - [PSME3_HUMAN]	49.21	13	13	37	254	29.4876	5.94775	1.02552	37	10.8481	1.02415	37	6.19509	1.04441	37	5.82223	0.949147	37	5.19509	1.00319	37	8.31242	0.971754	37	9.32672
P33993	DNA replication licensing factor MCM7	MCM7	DNA replication licensing factor MCM7 OS=Homo sapiens OX=9606 GN=MCM7 PE=1 SV=4 - [MCM7_HUMAN]	29.62	19	19	35	719	81.2566	6.45557	1.15173	35	12.2466	1.17775	35	8.08654	1.17587	35	11.2723	0.79841	35	19.1406	0.903043	35	11.4075	0.894963	35	9.96
P56537	Eukaryotic translation initiation factor 6	EIF6	Eukaryotic translation initiation factor 6 OS=Homo sapiens OX=9606 GN=EIF6 PE=1 SV=1 - [IF6_HUMAN]	46.53	7	7	19	245	26.5822	4.67822	0.980506	19	6.97153	0.965495	19	4.83118	0.997002	19	6.32497	1.00783	19	6.09343	0.961468	19	9.09894	1.01616	19	8.61554
P32969	60S ribosomal protein L9	RPL9	60S ribosomal protein L9 OS=Homo sapiens OX=9606 GN=RPL9 PE=1 SV=1 - [RL9_HUMAN]	56.77	9	9	21	192	21.8498	9.94971	0.992412	21	8.73015	0.922809	21	10.918	0.980725	21	8.27577	1.0432	21	4.95074	0.989249	21	14.4849	1.06895	21	5.682
P46087	Probable 28S rRNA (cytosine(4447)-C(5))-methyltransferase	NOP2	Probable 28S rRNA (cytosine(4447)-C(5))-methyltransferase OS=Homo sapiens OX=9606 GN=NOP2 PE=1 SV=2 - [NOP2_HUMAN]	26.6	20	20	36	812	89.2471	9.23193	0.942009	36	6.1324	0.957199	36	5.73733	0.960461	36	6.23185	1.08821	36	10.7975	1.01591	36	5.9259	1.05548	36	5.65065
P48047	ATP synthase subunit O, mitochondrial	ATP5PO	ATP synthase subunit O, mitochondrial OS=Homo sapiens OX=9606 GN=ATP5PO PE=1 SV=1 - [ATPO_HUMAN]	44.6	9	9	28	213	23.2627	9.96436	1.02278	27	7.27458	0.890439	27	5.2905	0.904965	27	5.71571	1.2309	27	9.1574	1.00619	27	5.06481	0.980291	27	7.44133
P23921	Ribonucleoside-diphosphate reductase large subunit	RRM1	Ribonucleoside-diphosphate reductase large subunit OS=Homo sapiens OX=9606 GN=RRM1 PE=1 SV=1 - [RIR1_HUMAN]	13.01	10	10	20	792	90.0125	7.15186	1.15213	20	12.1982	1.19796	20	10.8985	1.24871	20	6.81978	0.77823	20	15.7634	0.874415	20	11.7536	0.884803	20	5.42626
P08727	Keratin, type I cytoskeletal 19	KRT19	Keratin, type I cytoskeletal 19 OS=Homo sapiens OX=9606 GN=KRT19 PE=1 SV=4 - [K1C19_HUMAN]	14	2	6	40	400	44.0791	5.13525	1.07124	3	3.06468	0.926407	3	4.54908	0.912398	3	0.569439	1.14989	3	0.627108	1.03604	3	0.53265	0.943603	3	5.01075
Q9Y285	Phenylalanine--tRNA ligase alpha subunit	FARSA	Phenylalanine--tRNA ligase alpha subunit OS=Homo sapiens OX=9606 GN=FARSA PE=1 SV=3 - [SYFA_HUMAN]	43.31	17	17	31	508	57.5275	7.79639	0.981915	30	7.06649	1.00981	30	7.49193	0.994403	30	4.81113	1.0167	30	10.2716	1.0177	30	6.4455	0.997144	30	6.78749
P46779	60S ribosomal protein L28	RPL28	60S ribosomal protein L28 OS=Homo sapiens OX=9606 GN=RPL28 PE=1 SV=3 - [RL28_HUMAN]	49.64	9	9	32	137	15.7377	12.0151	1.00765	32	6.5202	0.998144	32	6.54958	0.997596	32	6.65893	1.06343	32	5.78846	0.941313	32	6.41164	1.00912	32	8.52883
P62333	26S proteasome regulatory subunit 10B	PSMC6	26S proteasome regulatory subunit 10B OS=Homo sapiens OX=9606 GN=PSMC6 PE=1 SV=1 - [PRS10_HUMAN]	42.42	15	15	36	389	44.1451	7.48877	1.00822	36	4.64431	1.02816	36	5.87809	1.0209	36	6.59965	0.97738	36	7.03209	1.0036	36	7.75765	1.00114	36	5.36932
Q9Y2W1	Thyroid hormone receptor-associated protein 3	THRAP3	Thyroid hormone receptor-associated protein 3 OS=Homo sapiens OX=9606 GN=THRAP3 PE=1 SV=2 - [TR150_HUMAN]	24.4	23	24	55	955	108.601	10.1548	0.993503	50	7.17178	1.03627	50	5.78504	1.04308	50	7.17378	0.954713	50	6.49779	1.00267	50	5.4227	0.98995	50	5.46754
Q92878	DNA repair protein RAD50	RAD50	DNA repair protein RAD50 OS=Homo sapiens OX=9606 GN=RAD50 PE=1 SV=1 - [RAD50_HUMAN]	24.85	36	36	55	1312	153.797	6.88818	1.07188	55	8.2425	1.03729	55	6.6138	1.03899	55	4.30211	0.96912	55	8.56871	0.966282	55	9.00239	0.955226	55	7.96932
Q15819	Ubiquitin-conjugating enzyme E2 variant 2	UBE2V2	Ubiquitin-conjugating enzyme E2 variant 2 OS=Homo sapiens OX=9606 GN=UBE2V2 PE=1 SV=4 - [UB2V2_HUMAN]	51.72	2	7	15	145	16.3522	8.08936	1.03366	2	2.3836	1.03393	2	9.7987	1.04399	2	5.29356	0.954746	2	13.5325	1.02107	2	9.15178	0.95504	2	8.53751
P61006	Ras-related protein Rab-8A	RAB8A	Ras-related protein Rab-8A OS=Homo sapiens OX=9606 GN=RAB8A PE=1 SV=1 - [RAB8A_HUMAN]	45.41	4	11	34	207	23.6532	9.0708	0.977997	6	4.25472	0.998732	6	2.65398	1.01608	6	2.12553	1.05457	6	8.48861	0.977378	6	12.6702	0.972882	6	4.91814
Q9HC35	Echinoderm microtubule-associated protein-like 4	EML4	Echinoderm microtubule-associated protein-like 4 OS=Homo sapiens OX=9606 GN=EML4 PE=1 SV=3 - [EMAL4_HUMAN]	32.72	27	27	47	981	108.848	6.40479	1.04508	47	11.5217	0.940689	47	6.23116	0.957672	47	5.84398	1.1254	47	11.5823	0.951206	47	5.27105	0.954006	47	11.0898
P35659	Protein DEK	DEK	Protein DEK OS=Homo sapiens OX=9606 GN=DEK PE=1 SV=1 - [DEK_HUMAN]	40.8	17	17	32	375	42.6479	8.55811	1.10171	32	11.5155	1.07274	32	7.09624	1.11345	32	5.78957	0.934813	32	6.7	0.904503	32	8.63612	0.905541	32	10.6811
O43633	Charged multivesicular body protein 2a	CHMP2A	Charged multivesicular body protein 2a OS=Homo sapiens OX=9606 GN=CHMP2A PE=1 SV=1 - [CHM2A_HUMAN]	33.78	9	9	20	222	25.0879	5.97314	0.987258	20	13.3913	1.01041	20	4.75438	1.05494	20	5.42281	0.933244	20	6.86664	0.994155	20	6.69084	1.01414	20	11.3128
Q9NVD7	Alpha-parvin	PARVA	Alpha-parvin OS=Homo sapiens OX=9606 GN=PARVA PE=1 SV=1 - [PARVA_HUMAN]	21.51	6	7	15	372	42.2174	5.94775	1.03232	12	7.87849	1.01498	12	2.21247	1.0881	12	2.2118	0.883646	12	8.58727	1.03221	12	2.3345	1.01024	12	5.52202
P11387	DNA topoisomerase 1	TOP1	DNA topoisomerase 1 OS=Homo sapiens OX=9606 GN=TOP1 PE=1 SV=2 - [TOP1_HUMAN]	31.9	25	28	61	765	90.6689	9.30518	0.927726	52	8.66761	0.926294	52	8.5487	0.931867	52	6.04452	1.12449	52	8.60086	1.04447	52	8.51053	1.02793	52	7.121
Q04446	1,4-alpha-glucan-branching enzyme	GBE1	1,4-alpha-glucan-branching enzyme OS=Homo sapiens OX=9606 GN=GBE1 PE=1 SV=3 - [GLGB_HUMAN]	26.64	18	18	33	702	80.4226	6.31592	1.09046	32	8.41211	0.968236	32	7.06359	0.993779	32	6.41897	0.976206	32	5.8837	0.952845	32	9.65249	1.01549	32	4.91538
P53004	Biliverdin reductase A	BLVRA	Biliverdin reductase A OS=Homo sapiens OX=9606 GN=BLVRA PE=1 SV=2 - [BIEA_HUMAN]	36.49	12	12	27	296	33.4073	6.44287	1.01318	27	8.71969	1.03448	27	5.51577	1.03976	27	6.96061	0.864872	27	12.4475	0.976613	27	8.49375	1.03794	27	6.0707
Q13409	Cytoplasmic dynein 1 intermediate chain 2	DYNC1I2	Cytoplasmic dynein 1 intermediate chain 2 OS=Homo sapiens OX=9606 GN=DYNC1I2 PE=1 SV=3 - [DC1I2_HUMAN]	25.55	13	13	35	638	71.4121	5.19873	0.926072	33	10.1027	0.92036	33	5.66145	0.9539	33	5.32931	1.03762	33	6.9398	1.0742	33	12.7258	1.05256	33	4.7835
P02751	Fibronectin	FN1	Fibronectin OS=Homo sapiens OX=9606 GN=FN1 PE=1 SV=4 - [FINC_HUMAN]	12.49	24	24	41	2386	262.46	5.70654	0.865926	41	18.5627	1.0317	41	6.54822	1.01953	41	6.10948	0.902315	41	11.5514	1.08341	41	13.4382	1.07498	41	8.14278
P62191	26S proteasome regulatory subunit 4	PSMC1	26S proteasome regulatory subunit 4 OS=Homo sapiens OX=9606 GN=PSMC1 PE=1 SV=1 - [PRS4_HUMAN]	57.27	22	24	46	440	49.1537	6.21436	1.00343	41	7.82534	1.0137	41	4.82768	1.0348	41	6.50029	0.976782	41	7.02069	1.00648	41	6.20534	0.986236	41	5.55818
Q9NQR4	Omega-amidase NIT2	NIT2	Omega-amidase NIT2 OS=Homo sapiens OX=9606 GN=NIT2 PE=1 SV=1 - [NIT2_HUMAN]	60.14	15	15	28	276	30.5886	7.21045	1.06778	28	5.53089	1.04926	28	5.90311	1.07845	28	4.45143	0.889213	28	9.14842	0.951376	28	6.01416	0.973859	28	5.22658
Q9H2G2	STE20-like serine/threonine-protein kinase	SLK	STE20-like serine/threonine-protein kinase OS=Homo sapiens OX=9606 GN=SLK PE=1 SV=1 - [SLK_HUMAN]	18.38	23	23	36	1235	142.607	5.14795	1.00351	33	6.48294	1.01371	33	5.88172	1.0021	33	4.73616	0.982674	33	7.24184	1.02837	33	5.01591	0.997484	33	4.03501
P54578	Ubiquitin carboxyl-terminal hydrolase 14	USP14	Ubiquitin carboxyl-terminal hydrolase 14 OS=Homo sapiens OX=9606 GN=USP14 PE=1 SV=3 - [UBP14_HUMAN]	46.76	24	24	38	494	56.033	5.30029	0.954911	38	15.1126	1.01188	38	4.31253	1.04654	38	7.02054	0.912437	38	5.64296	1.03115	38	16.0739	1.02376	38	7.57737
P37198	Nuclear pore glycoprotein p62	NUP62	Nuclear pore glycoprotein p62 OS=Homo sapiens OX=9606 GN=NUP62 PE=1 SV=3 - [NUP62_HUMAN]	19.16	8	8	23	522	53.2225	5.31299	1.07857	23	3.06137	1.03913	23	5.55839	1.03723	23	4.74718	0.992232	23	3.79642	0.964437	23	5.0797	0.933397	23	5.02346
P30086	Phosphatidylethanolamine-binding protein 1	PEBP1	Phosphatidylethanolamine-binding protein 1 OS=Homo sapiens OX=9606 GN=PEBP1 PE=1 SV=3 - [PEBP1_HUMAN]	49.2	7	7	32	187	21.0437	7.53271	1.05549	30	6.00753	1.09614	30	6.69371	1.07951	30	8.59836	0.880064	31	16.1749	0.916275	30	10.3825	1.01323	31	7.05386
Q13435	Splicing factor 3B subunit 2	SF3B2	Splicing factor 3B subunit 2 OS=Homo sapiens OX=9606 GN=SF3B2 PE=1 SV=2 - [SF3B2_HUMAN]	30.06	24	25	51	895	100.165	5.66846	1.01717	50	6.23262	1.00163	50	3.53204	1.02655	50	4.58851	1.00089	50	5.8807	0.997859	50	4.24994	0.96796	50	4.60611
P63092	Guanine nucleotide-binding protein G(s) subunit alpha isoforms short	GNAS	Guanine nucleotide-binding protein G(s) subunit alpha isoforms short OS=Homo sapiens OX=9606 GN=GNAS PE=1 SV=1 - [GNAS2_HUMAN]	36.04	12	13	28	394	45.6359	5.8208	1.02919	27	5.80453	1.00774	27	6.17474	0.971971	27	5.61847	1.03299	27	5.0681	1.02433	27	10.7775	0.960497	27	8.12401
Q99426	Tubulin-folding cofactor B	TBCB	Tubulin-folding cofactor B OS=Homo sapiens OX=9606 GN=TBCB PE=1 SV=2 - [TBCB_HUMAN]	36.07	9	9	31	244	27.3085	5.14795	1.09216	31	5.24038	1.09187	31	5.76927	1.07991	31	10.594	0.810644	31	10.507	0.941272	31	4.87219	0.991417	31	7.92903
P35754	Glutaredoxin-1	GLRX	Glutaredoxin-1 OS=Homo sapiens OX=9606 GN=GLRX PE=1 SV=2 - [GLRX1_HUMAN]	37.74	3	3	11	106	11.7682	8.08936	1.1892	11	10.8868	1.13878	11	6.66315	1.13854	11	7.47694	0.787722	11	13.2837	0.866997	11	9.42319	0.929866	11	2.20254
Q9Y6E2	Basic leucine zipper and W2 domain-containing protein 2	BZW2	Basic leucine zipper and W2 domain-containing protein 2 OS=Homo sapiens OX=9606 GN=BZW2 PE=1 SV=1 - [BZW2_HUMAN]	29.12	12	14	33	419	48.132	6.68311	0.950036	21	9.11995	0.974007	21	4.84307	0.989317	21	5.30982	0.947794	21	10.9906	1.043	21	8.21624	1.06185	21	8.12969
Q99733	Nucleosome assembly protein 1-like 4	NAP1L4	Nucleosome assembly protein 1-like 4 OS=Homo sapiens OX=9606 GN=NAP1L4 PE=1 SV=1 - [NP1L4_HUMAN]	32.8	10	11	29	375	42.7969	4.69092	1.02641	21	5.64625	1.05206	21	5.21029	1.07558	21	6.15742	0.913981	21	8.20436	0.938089	21	4.45986	0.99735	21	5.57732
Q9Y4W6	AFG3-like protein 2	AFG3L2	AFG3-like protein 2 OS=Homo sapiens OX=9606 GN=AFG3L2 PE=1 SV=2 - [AFG32_HUMAN]	20.2	17	17	27	797	88.5282	8.66064	0.931322	27	7.62947	0.934569	27	6.12208	0.918202	27	4.7956	1.12948	27	6.67734	1.04851	27	10.0232	1.01714	27	5.0592
P30048	Thioredoxin-dependent peroxide reductase, mitochondrial	PRDX3	Thioredoxin-dependent peroxide reductase, mitochondrial OS=Homo sapiens OX=9606 GN=PRDX3 PE=1 SV=3 - [PRDX3_HUMAN]	43.36	8	8	25	256	27.6752	7.78174	1.08568	25	6.46261	0.923054	25	9.69564	0.922649	25	4.69873	1.2146	25	7.8063	0.978464	25	5.96825	0.928127	25	3.12901
Q13404	Ubiquitin-conjugating enzyme E2 variant 1	UBE2V1	Ubiquitin-conjugating enzyme E2 variant 1 OS=Homo sapiens OX=9606 GN=UBE2V1 PE=1 SV=2 - [UB2V1_HUMAN]	56.46	3	8	19	147	16.4843	7.92822	1.06017	6	3.94794	1.05612	6	2.603	1.09118	6	3.25673	0.929355	6	3.8804	0.931379	6	6.35364	0.972689	6	4.19852
P09661	U2 small nuclear ribonucleoprotein A'	SNRPA1	U2 small nuclear ribonucleoprotein A' OS=Homo sapiens OX=9606 GN=SNRPA1 PE=1 SV=2 - [RU2A_HUMAN]	33.33	8	8	18	255	28.3981	8.6167	1.00899	18	8.26945	0.989321	18	4.62975	1.00428	18	2.09759	0.987749	18	3.85624	1.00281	18	8.06231	0.985095	18	4.26853
P22087	rRNA 2'-O-methyltransferase fibrillarin	FBL	rRNA 2'-O-methyltransferase fibrillarin OS=Homo sapiens OX=9606 GN=FBL PE=1 SV=2 - [FBRL_HUMAN]	45.48	14	14	40	321	33.7634	10.1841	0.965882	40	8.65272	0.907258	40	4.94661	0.917137	40	5.48161	1.19169	40	9.94003	1.01245	40	9.07398	0.999704	40	6.25489
P55036	26S proteasome non-ATPase regulatory subunit 4	PSMD4	26S proteasome non-ATPase regulatory subunit 4 OS=Homo sapiens OX=9606 GN=PSMD4 PE=1 SV=1 - [PSMD4_HUMAN]	28.91	9	9	18	377	40.7112	4.79248	0.998825	18	12.5173	1.03293	18	4.49313	1.03834	18	5.49924	0.975397	18	5.56449	0.986142	18	6.11229	1.00026	18	8.77305
Q9Y617	Phosphoserine aminotransferase	PSAT1	Phosphoserine aminotransferase OS=Homo sapiens OX=9606 GN=PSAT1 PE=1 SV=2 - [SERC_HUMAN]	35.95	13	14	28	370	40.3968	7.66455	0.906678	26	9.12041	0.947312	26	4.69029	0.992238	26	4.86903	0.918892	26	7.95005	1.08842	26	12.0838	1.13857	26	9.62305
O95994	Anterior gradient protein 2 homolog	AGR2	Anterior gradient protein 2 homolog OS=Homo sapiens OX=9606 GN=AGR2 PE=1 SV=1 - [AGR2_HUMAN]	68	10	10	26	175	19.9666	8.99756	1.12069	26	9.72211	0.883117	26	8.08671	0.863993	26	9.60877	1.35882	26	13.4604	0.90522	26	7.87817	0.877194	26	10.6338
P16949	Stathmin	STMN1	Stathmin OS=Homo sapiens OX=9606 GN=STMN1 PE=1 SV=3 - [STMN1_HUMAN]	58.39	10	10	31	149	17.292	5.97314	1.47887	31	14.0902	1.33124	31	9.29683	1.35233	31	6.76312	0.606955	31	25.3284	0.706711	31	18.8817	0.693091	31	17.7391
P50502	Hsc70-interacting protein	ST13	Hsc70-interacting protein OS=Homo sapiens OX=9606 GN=ST13 PE=1 SV=2 - [F10A1_HUMAN]	44.72	14	14	34	369	41.3055	5.2749	1.06859	34	8.06985	1.06324	34	4.00104	1.07425	34	6.80253	0.87466	34	6.40298	0.995826	34	5.11939	0.981806	34	6.34642
Q10471	Polypeptide N-acetylgalactosaminyltransferase 2	GALNT2	Polypeptide N-acetylgalactosaminyltransferase 2 OS=Homo sapiens OX=9606 GN=GALNT2 PE=1 SV=1 - [GALT2_HUMAN]	31	17	18	35	571	64.6915	8.35303	0.898475	30	6.33496	0.885475	30	8.79776	0.889324	30	7.39549	1.12607	30	7.14354	1.07421	30	10.3307	1.06796	30	5.64007
P23919	Thymidylate kinase	DTYMK	Thymidylate kinase OS=Homo sapiens OX=9606 GN=DTYMK PE=1 SV=4 - [KTHY_HUMAN]	60.38	14	14	29	212	23.8045	8.26514	1.05279	29	5.06808	1.07714	29	3.39739	1.09943	29	7.03951	0.893917	29	8.02182	0.953887	29	4.87477	0.979141	29	5.39361
O60832	H/ACA ribonucleoprotein complex subunit DKC1	DKC1	H/ACA ribonucleoprotein complex subunit DKC1 OS=Homo sapiens OX=9606 GN=DKC1 PE=1 SV=3 - [DKC1_HUMAN]	43.97	21	21	35	514	57.6378	9.42236	0.993519	35	8.16948	0.94638	35	3.92015	0.960873	35	5.58314	1.12049	35	9.27383	0.980157	35	5.61076	0.979902	35	8.5985
P21291	Cysteine and glycine-rich protein 1	CSRP1	Cysteine and glycine-rich protein 1 OS=Homo sapiens OX=9606 GN=CSRP1 PE=1 SV=3 - [CSRP1_HUMAN]	60.1	13	13	44	193	20.5538	8.57275	0.960224	44	10.3676	1.01389	44	4.47679	1.02961	44	7.08606	0.85765	44	9.40202	1.00204	44	14.1748	1.09239	44	8.2096
O94905	Erlin-2	ERLIN2	Erlin-2 OS=Homo sapiens OX=9606 GN=ERLIN2 PE=1 SV=1 - [ERLN2_HUMAN]	40.41	10	13	27	339	37.8155	5.61768	0.960164	19	7.73519	0.936355	19	8.92393	0.914893	19	5.54618	1.17558	19	5.6094	0.996044	19	6.00452	0.964973	19	6.51692
P22090	40S ribosomal protein S4, Y isoform 1	RPS4Y1	40S ribosomal protein S4, Y isoform 1 OS=Homo sapiens OX=9606 GN=RPS4Y1 PE=1 SV=2 - [RS4Y1_HUMAN]	20.91	1	7	34	263	29.437	10.2427	1.03617	1		1.11017	1		1.09252	1		0.879165	1		0.938654	1		0.996847	1
Q14258	E3 ubiquitin/ISG15 ligase TRIM25	TRIM25	E3 ubiquitin/ISG15 ligase TRIM25 OS=Homo sapiens OX=9606 GN=TRIM25 PE=1 SV=2 - [TRI25_HUMAN]	31.75	16	16	33	630	70.9277	8.08936	0.972669	33	5.7993	0.962447	33	7.25638	0.99269	33	6.10226	1.02114	33	4.59348	1.00543	33	8.43778	1.0295	33	6.61879
P08708	40S ribosomal protein S17	RPS17	40S ribosomal protein S17 OS=Homo sapiens OX=9606 GN=RPS17 PE=1 SV=2 - [RS17_HUMAN]	56.3	7	7	19	135	15.5404	9.84717	1.05471	19	11.8191	1.03279	19	8.49943	1.05628	19	8.2387	0.98524	19	4.49326	0.965078	19	8.92974	0.98837	19	6.31214
P48444	Coatomer subunit delta	ARCN1	Coatomer subunit delta OS=Homo sapiens OX=9606 GN=ARCN1 PE=1 SV=1 - [COPD_HUMAN]	41.68	22	22	41	511	57.1741	6.21436	0.983309	41	9.31659	0.956264	41	5.90729	0.986512	41	5.6177	1.00532	41	6.89848	1.00551	41	9.22344	1.04531	41	8.54329
P40261	Nicotinamide N-methyltransferase	NNMT	Nicotinamide N-methyltransferase OS=Homo sapiens OX=9606 GN=NNMT PE=1 SV=1 - [NNMT_HUMAN]	34.09	8	8	26	264	29.5551	5.74463	0.99795	26	6.36514	1.09942	26	9.1924	1.06276	26	7.6366	0.833133	26	15.9866	0.979511	26	5.85337	1.02142	26	2.71861
P13861	cAMP-dependent protein kinase type II-alpha regulatory subunit	PRKAR2A	cAMP-dependent protein kinase type II-alpha regulatory subunit OS=Homo sapiens OX=9606 GN=PRKAR2A PE=1 SV=2 - [KAP2_HUMAN]	47.03	16	16	25	404	45.49	5.07178	0.999034	25	7.75198	0.995282	25	11.5433	0.980569	25	4.18091	1.07092	25	8.3731	0.998907	25	4.72107	0.979812	25	4.13882
O14974	Protein phosphatase 1 regulatory subunit 12A	PPP1R12A	Protein phosphatase 1 regulatory subunit 12A OS=Homo sapiens OX=9606 GN=PPP1R12A PE=1 SV=1 - [MYPT1_HUMAN]	21.65	20	20	29	1030	115.211	5.40186	0.976754	29	8.68712	1.01473	29	5.84771	1.01441	29	4.38867	1.03529	29	10.4506	1.00016	29	4.62821	1.01021	29	5.22687
P14550	Aldo-keto reductase family 1 member A1	AKR1A1	Aldo-keto reductase family 1 member A1 OS=Homo sapiens OX=9606 GN=AKR1A1 PE=1 SV=3 - [AK1A1_HUMAN]	49.85	14	15	23	325	36.5499	6.78564	1.08681	19	13.0717	1.07324	19	6.5752	1.06358	19	3.68736	0.918157	19	4.33754	0.938571	19	12.9485	0.970896	19	4.8138
Q16629	Serine/arginine-rich splicing factor 7	SRSF7	Serine/arginine-rich splicing factor 7 OS=Homo sapiens OX=9606 GN=SRSF7 PE=1 SV=1 - [SRSF7_HUMAN]	28.15	6	7	25	238	27.35	11.8247	0.982889	19	3.61525	0.991371	19	3.8022	0.994723	19	6.99366	1.08582	19	6.98742	1.01668	19	6.50052	0.977581	19	5.49456
Q13451	Peptidyl-prolyl cis-trans isomerase FKBP5	FKBP5	Peptidyl-prolyl cis-trans isomerase FKBP5 OS=Homo sapiens OX=9606 GN=FKBP5 PE=1 SV=2 - [FKBP5_HUMAN]	55.14	25	26	42	457	51.1796	5.89697	0.93509	41	8.91756	1.05125	41	4.41612	1.09268	41	6.65433	0.906289	41	7.35122	1.03388	41	5.49292	0.995085	41	6.57599
P04181	Ornithine aminotransferase, mitochondrial	OAT	Ornithine aminotransferase, mitochondrial OS=Homo sapiens OX=9606 GN=OAT PE=1 SV=1 - [OAT_HUMAN]	25.74	11	11	22	439	48.5042	7.03467	0.964268	22	8.36505	0.971573	22	5.31704	0.963588	22	6.29782	1.04595	22	5.17753	1.03056	22	3.03432	1.00344	22	6.64193
P08754	Guanine nucleotide-binding protein G(k) subunit alpha	GNAI3	Guanine nucleotide-binding protein G(k) subunit alpha OS=Homo sapiens OX=9606 GN=GNAI3 PE=1 SV=3 - [GNAI3_HUMAN]	40.4	5	13	28	354	40.5063	5.69385	0.988582	10	8.59	0.970811	10	4.64622	0.979481	10	5.44706	1.04628	10	7.65581	1.04152	10	6.3738	0.989684	10	4.12002
P24539	ATP synthase F(0) complex subunit B1, mitochondrial	ATP5PB	ATP synthase F(0) complex subunit B1, mitochondrial OS=Homo sapiens OX=9606 GN=ATP5PB PE=1 SV=2 - [AT5F1_HUMAN]	32.03	9	9	38	256	28.8903	9.36377	0.96914	38	8.60271	0.890412	38	7.53729	0.893476	38	6.61601	1.21882	38	9.54054	0.99927	38	8.44772	0.989487	38	5.3959
Q96TA1	Niban-like protein 1	FAM129B	Niban-like protein 1 OS=Homo sapiens OX=9606 GN=FAM129B PE=1 SV=3 - [NIBL1_HUMAN]	26.01	19	19	27	746	84.0847	6.18896	1.03303	27	6.38463	1.06772	27	3.69485	1.0687	27	4.50403	0.949148	27	9.78839	0.948933	27	8.16255	0.974531	27	7.94084
Q92688	Acidic leucine-rich nuclear phosphoprotein 32 family member B	ANP32B	Acidic leucine-rich nuclear phosphoprotein 32 family member B OS=Homo sapiens OX=9606 GN=ANP32B PE=1 SV=1 - [AN32B_HUMAN]	36.65	5	13	39	251	28.7703	4.05615	1.01671	12	4.89462	1.01494	12	4.99969	1.04958	12	4.54023	0.9606	12	8.06631	1.03066	12	3.68459	0.980808	12	4.68917
Q969V3	Nicalin	NCLN	Nicalin OS=Homo sapiens OX=9606 GN=NCLN PE=1 SV=2 - [NCLN_HUMAN]	21.49	10	10	19	563	62.9346	6.88818	1.01656	19	6.34479	0.947574	19	4.75031	0.952716	19	6.96162	1.08261	19	7.31853	0.996063	19	5.4089	0.976502	19	6.18078
Q9BXP5	Serrate RNA effector molecule homolog	SRRT	Serrate RNA effector molecule homolog OS=Homo sapiens OX=9606 GN=SRRT PE=1 SV=1 - [SRRT_HUMAN]	26.03	21	22	43	876	100.604	5.96045	1.01477	42	8.5644	1.00011	42	4.99627	1.01472	42	5.00971	1.00775	42	6.61719	1.00891	42	6.97684	0.990682	42	7.65535
Q9UKV3	Apoptotic chromatin condensation inducer in the nucleus	ACIN1	Apoptotic chromatin condensation inducer in the nucleus OS=Homo sapiens OX=9606 GN=ACIN1 PE=1 SV=2 - [ACINU_HUMAN]	17.97	23	23	34	1341	151.771	6.43018	0.991675	34	8.64425	1.01699	34	7.41402	1.03905	34	6.03845	1.00877	34	8.66794	0.977051	34	7.56402	1.01023	34	6.8683
P18621	60S ribosomal protein L17	RPL17	60S ribosomal protein L17 OS=Homo sapiens OX=9606 GN=RPL17 PE=1 SV=3 - [RL17_HUMAN]	53.26	7	9	48	184	21.3833	10.1694	1.02393	41	5.17372	1.04402	41	3.98016	1.03829	41	4.60085	1.03368	41	5.44294	0.927358	41	7.89624	0.976847	41	4.10762
O43684	Mitotic checkpoint protein BUB3	BUB3	Mitotic checkpoint protein BUB3 OS=Homo sapiens OX=9606 GN=BUB3 PE=1 SV=1 - [BUB3_HUMAN]	32.62	9	9	18	328	37.1312	6.84424	1.05582	18	9.49969	1.02976	18	4.78489	1.08071	18	5.9923	0.955753	18	8.60648	0.974556	18	5.22719	0.969277	18	7.40049
Q15691	Microtubule-associated protein RP/EB family member 1	MAPRE1	Microtubule-associated protein RP/EB family member 1 OS=Homo sapiens OX=9606 GN=MAPRE1 PE=1 SV=3 - [MARE1_HUMAN]	49.63	9	12	34	268	29.9802	5.13525	1.00103	24	13.8445	1.03177	24	8.29606	1.06219	24	7.37694	0.899682	24	8.3706	0.986488	24	8.709	1.00649	24	6.65092
P62750	60S ribosomal protein L23a	RPL23A	60S ribosomal protein L23a OS=Homo sapiens OX=9606 GN=RPL23A PE=1 SV=1 - [RL23A_HUMAN]	51.28	11	11	50	156	17.6841	10.4478	1.04568	50	6.51913	1.0175	50	6.82698	1.02652	50	6.91576	0.974911	50	7.80588	0.971959	50	5.54989	0.981427	50	6.06376
Q96KP4	Cytosolic non-specific dipeptidase	CNDP2	Cytosolic non-specific dipeptidase OS=Homo sapiens OX=9606 GN=CNDP2 PE=1 SV=2 - [CNDP2_HUMAN]	34.74	13	13	24	475	52.8449	5.97314	1.02064	24	2.98505	1.04085	24	3.88375	1.05435	24	4.70391	0.915131	24	6.78151	0.98687	24	5.67891	1.02358	24	4.30614
P28066	Proteasome subunit alpha type-5	PSMA5	Proteasome subunit alpha type-5 OS=Homo sapiens OX=9606 GN=PSMA5 PE=1 SV=3 - [PSA5_HUMAN]	46.06	9	9	21	241	26.3942	4.79248	0.99032	21	4.39756	1.00019	21	4.16941	1.02616	21	5.43632	0.958803	21	5.62185	1.02569	21	5.56766	1.00878	21	6.2555
Q9BUJ2	Heterogeneous nuclear ribonucleoprotein U-like protein 1	HNRNPUL1	Heterogeneous nuclear ribonucleoprotein U-like protein 1 OS=Homo sapiens OX=9606 GN=HNRNPUL1 PE=1 SV=2 - [HNRL1_HUMAN]	25.82	21	22	54	856	95.6793	6.91748	1.0051	52	9.28681	1.01741	52	5.51757	1.02943	52	5.77905	1.01441	52	7.18112	0.9469	52	9.23175	1.01702	52	8.74715
P84098	60S ribosomal protein L19	RPL19	60S ribosomal protein L19 OS=Homo sapiens OX=9606 GN=RPL19 PE=1 SV=1 - [RL19_HUMAN]	41.84	11	12	40	196	23.4512	11.4731	0.977564	32	11.8816	1.02793	32	6.47207	1.00549	33	3.31488	1.00903	32	10.6079	1.00328	32	11.1278	0.977963	32	8.18639
Q14444	Caprin-1	CAPRIN1	Caprin-1 OS=Homo sapiens OX=9606 GN=CAPRIN1 PE=1 SV=2 - [CAPR1_HUMAN]	20.87	10	10	21	709	78.318	5.24951	1.05984	21	8.57013	1.08536	21	10.1824	1.12016	21	6.64284	0.872138	21	8.03222	0.965921	21	7.18578	0.946843	21	7.22593
P62249	40S ribosomal protein S16	RPS16	40S ribosomal protein S16 OS=Homo sapiens OX=9606 GN=RPS16 PE=1 SV=2 - [RS16_HUMAN]	39.73	8	8	30	146	16.435	10.2134	0.887788	30	19.1314	1.01545	30	4.82443	0.990763	30	8.4399	0.984525	30	8.68403	1.03709	30	17.429	1.01352	30	6.22552
Q9UKS6	Protein kinase C and casein kinase substrate in neurons protein 3	PACSIN3	Protein kinase C and casein kinase substrate in neurons protein 3 OS=Homo sapiens OX=9606 GN=PACSIN3 PE=1 SV=2 - [PACN3_HUMAN]	33.02	11	11	18	424	48.4568	6.17627	0.990678	18	2.80459	1.04208	18	4.47884	1.04126	18	4.01506	0.969019	18	6.58979	1.00101	18	4.51551	0.977902	18	3.82785
O43809	Cleavage and polyadenylation specificity factor subunit 5	NUDT21	Cleavage and polyadenylation specificity factor subunit 5 OS=Homo sapiens OX=9606 GN=NUDT21 PE=1 SV=1 - [CPSF5_HUMAN]	29.96	8	8	19	227	26.2107	8.82178	1.01852	18	14.5771	1.02668	18	3.17825	1.04473	18	4.68412	0.983179	18	6.10407	1.01634	18	8.08685	0.971662	18	8.46799
Q9UM54	Unconventional myosin-VI	MYO6	Unconventional myosin-VI OS=Homo sapiens OX=9606 GN=MYO6 PE=1 SV=4 - [MYO6_HUMAN]	15.92	17	17	24	1294	149.596	8.52881	0.984521	24	7.85395	0.948834	24	5.82043	0.968994	24	6.29068	1.02981	24	8.24031	1.00958	24	5.87854	1.01914	24	5.40474
Q92621	Nuclear pore complex protein Nup205	NUP205	Nuclear pore complex protein Nup205 OS=Homo sapiens OX=9606 GN=NUP205 PE=1 SV=3 - [NU205_HUMAN]	13.72	24	24	34	2012	227.776	6.18896	1.01254	33	9.94866	1.06508	33	6.78669	1.04234	33	4.92085	0.983986	33	5.95832	0.959161	33	6.78913	0.962658	33	7.93531
Q9ULV4	Coronin-1C	CORO1C	Coronin-1C OS=Homo sapiens OX=9606 GN=CORO1C PE=1 SV=1 - [COR1C_HUMAN]	31.01	17	17	44	474	53.2151	7.07861	0.900013	44	8.82931	0.942059	44	3.20905	0.959857	44	6.17549	1.05123	44	6.68057	1.06555	44	14.1412	1.05351	44	5.87047
P60900	Proteasome subunit alpha type-6	PSMA6	Proteasome subunit alpha type-6 OS=Homo sapiens OX=9606 GN=PSMA6 PE=1 SV=1 - [PSA6_HUMAN]	58.94	14	14	34	246	27.3818	6.75635	0.965136	34	5.53948	0.97331	34	2.97247	1.00546	34	3.76881	0.945596	34	4.95607	1.03731	34	9.00935	1.03769	34	5.01335
P00492	Hypoxanthine-guanine phosphoribosyltransferase	HPRT1	Hypoxanthine-guanine phosphoribosyltransferase OS=Homo sapiens OX=9606 GN=HPRT1 PE=1 SV=2 - [HPRT_HUMAN]	47.25	9	9	23	218	24.5636	6.68311	1.04585	23	8.78129	1.0263	23	2.53943	1.03046	23	3.66716	0.900316	23	7.45694	0.980999	23	7.11168	1.05343	23	5.82106
P30085	UMP-CMP kinase	CMPK1	UMP-CMP kinase OS=Homo sapiens OX=9606 GN=CMPK1 PE=1 SV=3 - [KCY_HUMAN]	42.35	8	8	20	196	22.2083	5.56689	1.06741	20	12.8382	1.08641	20	4.33337	1.09751	20	8.86806	0.859622	20	8.37595	0.938247	20	20.3533	1.00984	20	9.15472
P39023	60S ribosomal protein L3	RPL3	60S ribosomal protein L3 OS=Homo sapiens OX=9606 GN=RPL3 PE=1 SV=2 - [RL3_HUMAN]	47.15	20	20	62	403	46.0798	10.1841	1.00397	62	9.0099	1.01751	62	5.74604	1.04905	62	7.75899	1.00879	62	6.89022	0.964556	62	6.36201	0.993493	62	7.27559
Q9H0A0	RNA cytidine acetyltransferase	NAT10	RNA cytidine acetyltransferase OS=Homo sapiens OX=9606 GN=NAT10 PE=1 SV=2 - [NAT10_HUMAN]	22.34	20	20	31	1025	115.657	8.26514	1.02609	31	7.43055	1.0246	31	6.08892	1.048	31	5.50257	1.02072	31	7.66017	0.966683	31	6.559	0.923197	31	6.62189
Q15155	Nodal modulator 1	NOMO1	Nodal modulator 1 OS=Homo sapiens OX=9606 GN=NOMO1 PE=1 SV=5 - [NOMO1_HUMAN]	13.42	1	15	28	1222	134.239	5.80811	0.99781	1		0.968064	1		0.946774	1		1.13371	1		0.998128	1		0.983555	1
Q9UIQ6	Leucyl-cystinyl aminopeptidase	LNPEP	Leucyl-cystinyl aminopeptidase OS=Homo sapiens OX=9606 GN=LNPEP PE=1 SV=3 - [LCAP_HUMAN]	14.83	12	12	20	1025	117.274	5.73193	0.950101	20	4.7828	0.972647	20	10.9332	0.946771	20	4.37025	1.07559	20	10.434	1.03043	20	4.94846	1.03508	20	6.18735
Q07973	1,25-dihydroxyvitamin D(3) 24-hydroxylase, mitochondrial	CYP24A1	1,25-dihydroxyvitamin D(3) 24-hydroxylase, mitochondrial OS=Homo sapiens OX=9606 GN=CYP24A1 PE=1 SV=2 - [CP24A_HUMAN]	40.86	16	16	31	514	58.8374	8.74854	0.893703	31	6.25243	0.876192	31	6.86219	0.878899	31	5.96463	1.17445	31	8.42934	1.0774	31	8.84316	1.04884	31	9.18325
Q9Y5L4	Mitochondrial import inner membrane translocase subunit Tim13	TIMM13	Mitochondrial import inner membrane translocase subunit Tim13 OS=Homo sapiens OX=9606 GN=TIMM13 PE=1 SV=1 - [TIM13_HUMAN]	77.89	6	6	14	95	10.493	8.17725	0.971026	14	5.67706	0.909089	14	4.42133	0.893236	14	7.58003	1.15288	14	10.038	1.03334	14	6.978	1.01871	14	5.4906
P16104	Histone H2AX	H2AFX	Histone H2AX OS=Homo sapiens OX=9606 GN=H2AFX PE=1 SV=2 - [H2AX_HUMAN]	38.46	2	6	42	143	15.1354	10.7407	1.04078	3	17.6571	1.0433	3	3.12065	0.959192	3	2.96594	1.15938	3	15.6817	0.673238	3	22.5507	0.997097	3	9.5711
Q9Y295	Developmentally-regulated GTP-binding protein 1	DRG1	Developmentally-regulated GTP-binding protein 1 OS=Homo sapiens OX=9606 GN=DRG1 PE=1 SV=1 - [DRG1_HUMAN]	42.23	12	13	22	367	40.5168	8.89502	1.00695	21	10.418	1.04693	21	6.67997	1.02637	21	6.00907	0.949497	21	10.6951	1.00272	21	8.63246	0.989793	21	8.40037
P46060	Ran GTPase-activating protein 1	RANGAP1	Ran GTPase-activating protein 1 OS=Homo sapiens OX=9606 GN=RANGAP1 PE=1 SV=1 - [RAGP1_HUMAN]	28.79	15	15	22	587	63.5023	4.67822	0.952252	22	3.44281	1.02311	22	2.9837	1.03196	22	4.13668	1.01812	22	4.9804	1.00576	22	4.57245	0.991878	22	3.69167
P55735	Protein SEC13 homolog	SEC13	Protein SEC13 homolog OS=Homo sapiens OX=9606 GN=SEC13 PE=1 SV=3 - [SEC13_HUMAN]	33.23	8	8	20	322	35.5181	5.47803	1.01934	18	5.08749	1.00437	18	3.0181	1.00071	18	4.64905	0.94808	18	9.21653	1.01852	18	4.50487	1.01007	18	3.74953
P18077	60S ribosomal protein L35a	RPL35A	60S ribosomal protein L35a OS=Homo sapiens OX=9606 GN=RPL35A PE=1 SV=2 - [RL35A_HUMAN]	58.18	8	8	40	110	12.5298	11.063	1.05432	40	8.61451	1.0039	40	6.08572	1.01682	40	6.48366	1.04419	40	10.2569	0.946325	40	6.04618	0.959281	40	8.82483
O43399	Tumor protein D54	TPD52L2	Tumor protein D54 OS=Homo sapiens OX=9606 GN=TPD52L2 PE=1 SV=2 - [TPD54_HUMAN]	56.8	11	11	24	206	22.2243	5.36377	1.00742	24	10.0167	0.979947	24	5.0089	0.962736	24	8.4236	0.946979	24	11.6254	0.982518	24	8.49544	1.05626	24	9.55511
O15144	Actin-related protein 2/3 complex subunit 2	ARPC2	Actin-related protein 2/3 complex subunit 2 OS=Homo sapiens OX=9606 GN=ARPC2 PE=1 SV=1 - [ARPC2_HUMAN]	57.33	18	18	46	300	34.3115	7.35693	0.99416	45	6.07581	0.986215	45	7.99988	0.982791	45	5.5592	0.980691	45	7.07603	1.01354	45	5.36784	1.0403	45	6.8099
P52701	DNA mismatch repair protein Msh6	MSH6	DNA mismatch repair protein Msh6 OS=Homo sapiens OX=9606 GN=MSH6 PE=1 SV=2 - [MSH6_HUMAN]	17.94	23	23	32	1360	152.689	6.90283	1.09699	32	8.56065	1.14337	32	7.33093	1.13799	32	10.9173	0.841073	32	10.9467	0.918846	32	5.36427	0.916508	32	7.69691
Q15369	Elongin-C	ELOC	Elongin-C OS=Homo sapiens OX=9606 GN=ELOC PE=1 SV=1 - [ELOC_HUMAN]	65.18	6	6	23	112	12.465	4.77979	1.0131	23	6.74031	0.992484	23	6.53719	0.997683	23	6.18337	0.962221	23	6.89976	1.02049	23	8.54725	1.03788	23	5.37597
P33991	DNA replication licensing factor MCM4	MCM4	DNA replication licensing factor MCM4 OS=Homo sapiens OX=9606 GN=MCM4 PE=1 SV=5 - [MCM4_HUMAN]	22.83	22	22	40	863	96.4976	6.7417	1.16727	40	11.0488	1.12678	40	10.2304	1.14245	40	14.3861	0.816993	40	19.3105	0.89354	40	12.4637	0.863545	40	14.3867
Q8TEM1	Nuclear pore membrane glycoprotein 210	NUP210	Nuclear pore membrane glycoprotein 210 OS=Homo sapiens OX=9606 GN=NUP210 PE=1 SV=3 - [PO210_HUMAN]	11.76	19	19	28	1887	204.983	6.81494	1.06379	28	9.77428	1.05514	28	4.22349	1.05551	28	5.18869	0.994883	28	3.80621	0.938842	28	8.2883	0.927111	28	7.436
O75475	PC4 and SFRS1-interacting protein	PSIP1	PC4 and SFRS1-interacting protein OS=Homo sapiens OX=9606 GN=PSIP1 PE=1 SV=1 - [PSIP1_HUMAN]	40.75	23	24	50	530	60.0667	9.12939	1.07162	42	9.39616	1.08578	42	5.79991	1.09962	42	5.33564	0.98817	42	7.50992	0.921838	42	7.56725	0.92104	42	5.94686
P56192	Methionine--tRNA ligase, cytoplasmic	MARS	Methionine--tRNA ligase, cytoplasmic OS=Homo sapiens OX=9606 GN=MARS PE=1 SV=2 - [SYMC_HUMAN]	34.56	23	23	32	900	101.052	6.16357	0.969126	32	9.20843	0.963321	32	4.56349	0.991738	32	4.15761	1.04804	32	9.49945	1.00072	32	5.93529	1.01267	32	7.94494
P07741	Adenine phosphoribosyltransferase	APRT	Adenine phosphoribosyltransferase OS=Homo sapiens OX=9606 GN=APRT PE=1 SV=2 - [APT_HUMAN]	62.78	10	10	21	180	19.5954	6.02393	1.06677	21	14.4301	1.05048	21	3.89172	1.09749	21	5.29166	0.873329	21	6.18415	0.960791	21	5.31638	1.00863	21	3.55131
Q9Y281	Cofilin-2	CFL2	Cofilin-2 OS=Homo sapiens OX=9606 GN=CFL2 PE=1 SV=1 - [COF2_HUMAN]	77.11	9	13	35	166	18.7249	7.88428	1.0142	13	4.66002	1.02663	13	4.19348	1.02633	13	5.61865	0.942664	13	8.40499	1.0343	13	6.36632	1.01704	13	5.0946
Q16204	Coiled-coil domain-containing protein 6	CCDC6	Coiled-coil domain-containing protein 6 OS=Homo sapiens OX=9606 GN=CCDC6 PE=1 SV=2 - [CCDC6_HUMAN]	30.59	14	14	20	474	53.2578	7.34229	1.02642	20	4.27394	1.02361	20	5.32016	1.01689	20	3.68142	0.947715	20	9.21205	1.03919	20	11.2798	0.982612	20	3.18837
P62917	60S ribosomal protein L8	RPL8	60S ribosomal protein L8 OS=Homo sapiens OX=9606 GN=RPL8 PE=1 SV=2 - [RL8_HUMAN]	47.86	13	13	39	257	28.0073	11.0337	1.02371	39	7.07544	1.0153	39	5.25437	1.01811	39	5.45772	1.02722	39	4.54064	0.996345	39	5.04481	0.965529	39	7.1948
P00491	Purine nucleoside phosphorylase	PNP	Purine nucleoside phosphorylase OS=Homo sapiens OX=9606 GN=PNP PE=1 SV=2 - [PNPH_HUMAN]	58.48	12	12	20	289	32.0972	6.94678	0.993302	20	5.26031	1.00387	20	6.78538	1.02503	20	3.56373	0.91706	20	10.4707	0.988114	20	8.84703	1.08656	20	9.17144
Q8N684	Cleavage and polyadenylation specificity factor subunit 7	CPSF7	Cleavage and polyadenylation specificity factor subunit 7 OS=Homo sapiens OX=9606 GN=CPSF7 PE=1 SV=1 - [CPSF7_HUMAN]	29.51	13	13	22	471	52.0183	8.00146	0.996046	22	10.089	1.00513	22	4.58523	1.01227	22	6.7023	1.0106	22	8.47594	1.00797	22	8.14393	0.985016	22	7.28117
P25787	Proteasome subunit alpha type-2	PSMA2	Proteasome subunit alpha type-2 OS=Homo sapiens OX=9606 GN=PSMA2 PE=1 SV=2 - [PSA2_HUMAN]	47.86	6	6	11	234	25.8823	7.43018	0.963771	11	5.35837	1.03461	11	7.22194	0.998218	11	3.99388	0.991787	11	4.32227	0.997565	11	3.61476	1.02533	11	5.87178
Q9NUQ9	Protein FAM49B	FAM49B	Protein FAM49B OS=Homo sapiens OX=9606 GN=FAM49B PE=1 SV=1 - [FA49B_HUMAN]	30.86	9	9	20	324	36.7246	6.06201	1.03102	20	4.14644	1.04129	20	4.62546	1.0329	20	4.86247	0.907655	20	8.02236	0.989527	20	7.4815	0.995097	20	4.73731
O60361	Putative nucleoside diphosphate kinase	NME2P1	Putative nucleoside diphosphate kinase OS=Homo sapiens OX=9606 GN=NME2P1 PE=5 SV=1 - [NDK8_HUMAN]	66.42	1	8	58	137	15.519	8.57275	1.34319	3	1.9074	0.956729	3	5.35325	1.05893	3	0.389781	0.930728	3	0.575452	0.690975	3	2.83921	1.05322	3	3.36518
Q9UHX1	Poly(U)-binding-splicing factor PUF60	PUF60	Poly(U)-binding-splicing factor PUF60 OS=Homo sapiens OX=9606 GN=PUF60 PE=1 SV=1 - [PUF60_HUMAN]	28.62	15	15	38	559	59.8376	5.2876	1.02315	38	5.08795	1.04115	38	4.69896	1.08731	38	3.90033	0.913146	38	6.59462	1.00107	38	4.8346	0.982026	38	4.43911
Q9HDC9	Adipocyte plasma membrane-associated protein	APMAP	Adipocyte plasma membrane-associated protein OS=Homo sapiens OX=9606 GN=APMAP PE=1 SV=2 - [APMAP_HUMAN]	34.38	14	14	38	416	46.4509	6.16357	1.01672	38	6.57821	0.900687	38	5.59931	0.929977	38	6.23552	1.24345	38	8.09894	0.994656	38	6.69799	0.961687	38	5.689
Q12888	TP53-binding protein 1	TP53BP1	TP53-binding protein 1 OS=Homo sapiens OX=9606 GN=TP53BP1 PE=1 SV=2 - [TP53B_HUMAN]	9.94	16	16	20	1972	213.443	4.70361	1.00728	20	9.48034	1.09638	20	5.75055	1.07215	20	5.80979	0.953143	20	8.05642	0.96488	20	3.73365	0.924438	20	6.45395
O15511	Actin-related protein 2/3 complex subunit 5	ARPC5	Actin-related protein 2/3 complex subunit 5 OS=Homo sapiens OX=9606 GN=ARPC5 PE=1 SV=3 - [ARPC5_HUMAN]	62.25	9	10	19	151	16.3103	5.66846	0.973896	18	8.00015	0.995258	18	5.03768	1.01408	18	3.91625	0.971226	18	7.91819	1.01388	18	7.17463	1.03784	18	14.5943
P61011	Signal recognition particle 54 kDa protein	SRP54	Signal recognition particle 54 kDa protein OS=Homo sapiens OX=9606 GN=SRP54 PE=1 SV=1 - [SRP54_HUMAN]	27.58	14	14	26	504	55.6683	8.74854	0.982862	26	6.70052	0.972772	26	4.93517	0.983562	26	3.4804	1.00363	26	5.7766	1.04004	26	6.63788	1.01312	26	7.32499
Q00325	Phosphate carrier protein, mitochondrial	SLC25A3	Phosphate carrier protein, mitochondrial OS=Homo sapiens OX=9606 GN=SLC25A3 PE=1 SV=2 - [MPCP_HUMAN]	30.11	13	13	41	362	40.0687	9.37842	0.854737	41	14.1985	0.846788	41	8.50776	0.854598	41	6.16245	1.17481	41	11.2255	1.08592	41	9.97639	1.06831	41	8.42364
Q86V81	THO complex subunit 4	ALYREF	THO complex subunit 4 OS=Homo sapiens OX=9606 GN=ALYREF PE=1 SV=3 - [THOC4_HUMAN]	28.4	6	6	18	257	26.8716	11.1509	1.0102	18	6.11358	0.992602	18	4.42574	1.00744	18	6.7203	1.03144	18	3.56646	1.00014	18	8.08681	0.990103	18	5.22586
Q12904	Aminoacyl tRNA synthase complex-interacting multifunctional protein 1	AIMP1	Aminoacyl tRNA synthase complex-interacting multifunctional protein 1 OS=Homo sapiens OX=9606 GN=AIMP1 PE=1 SV=2 - [AIMP1_HUMAN]	40.71	10	12	29	312	34.3311	8.42627	0.97411	22	7.08983	1.0063	22	5.30897	1.02624	22	4.04645	1.04009	22	4.83919	1.01	22	4.4389	0.977305	22	7.47371
P24666	Low molecular weight phosphotyrosine protein phosphatase	ACP1	Low molecular weight phosphotyrosine protein phosphatase OS=Homo sapiens OX=9606 GN=ACP1 PE=1 SV=3 - [PPAC_HUMAN]	56.96	8	8	21	158	18.0308	6.7417	1.0667	21	6.28585	1.03602	21	3.94474	1.04365	21	4.87707	0.868737	21	11.8855	0.991392	21	5.98526	1.01985	21	5.70166
Q13228	Methanethiol oxidase	SELENBP1	Methanethiol oxidase OS=Homo sapiens OX=9606 GN=SELENBP1 PE=1 SV=2 - [SBP1_HUMAN]	37.71	14	15	24	472	52.3576	6.3667	1.0997	23	12.3815	1.09716	23	7.14646	1.07574	23	8.36562	0.928769	23	11.986	0.902734	23	10.6694	0.94485	23	7.51994
Q14157	Ubiquitin-associated protein 2-like	UBAP2L	Ubiquitin-associated protein 2-like OS=Homo sapiens OX=9606 GN=UBAP2L PE=1 SV=2 - [UBP2L_HUMAN]	17.39	14	14	16	1087	114.465	7.10791	0.965593	16	4.95883	1.00666	16	4.27934	0.99554	16	5.1729	0.945559	16	7.02837	1.00405	16	4.62193	1.05912	16	4.32055
Q16822	Phosphoenolpyruvate carboxykinase [GTP], mitochondrial	PCK2	Phosphoenolpyruvate carboxykinase [GTP], mitochondrial OS=Homo sapiens OX=9606 GN=PCK2 PE=1 SV=4 - [PCKGM_HUMAN]	30.31	16	16	36	640	70.6536	7.62061	0.972994	36	9.34894	0.897087	36	9.47833	0.917287	36	9.05089	1.17223	36	14.2432	1.0329	36	6.07902	0.99422	36	5.96821
Q92930	Ras-related protein Rab-8B	RAB8B	Ras-related protein Rab-8B OS=Homo sapiens OX=9606 GN=RAB8B PE=1 SV=2 - [RAB8B_HUMAN]	41.06	3	10	33	207	23.5691	9.0708	0.976666	5	6.60054	0.89125	5	4.84582	0.900348	5	4.23123	1.18292	5	7.03097	1.04293	5	4.15505	1.02125	5	4.34207
Q8NBQ5	Estradiol 17-beta-dehydrogenase 11	HSD17B11	Estradiol 17-beta-dehydrogenase 11 OS=Homo sapiens OX=9606 GN=HSD17B11 PE=1 SV=3 - [DHB11_HUMAN]	38	11	11	29	300	32.9147	9.0708	1.05362	29	9.85649	0.949915	29	7.01022	0.951627	29	5.31253	1.09802	29	12.6029	0.992428	29	9.97283	0.962708	29	13.4091
Q13561	Dynactin subunit 2	DCTN2	Dynactin subunit 2 OS=Homo sapiens OX=9606 GN=DCTN2 PE=1 SV=4 - [DCTN2_HUMAN]	27.43	10	10	18	401	44.2039	5.21143	0.995025	17	5.32546	0.99427	17	4.31493	1.01889	17	3.23193	0.993961	17	5.17311	1.03904	17	3.93685	0.966445	17	7.40663
P63220	40S ribosomal protein S21	RPS21	40S ribosomal protein S21 OS=Homo sapiens OX=9606 GN=RPS21 PE=1 SV=1 - [RS21_HUMAN]	73.49	6	6	22	83	9.10557	8.49951	0.968635	19	6.89565	1.03726	19	9.60581	1.0184	19	4.92603	1.04685	19	5.3718	0.957612	19	3.80123	0.987935	19	8.34007
Q92900	Regulator of nonsense transcripts 1	UPF1	Regulator of nonsense transcripts 1 OS=Homo sapiens OX=9606 GN=UPF1 PE=1 SV=2 - [RENT1_HUMAN]	19.13	18	18	30	1129	124.267	6.60986	1.00218	30	8.42085	1.00585	30	4.70759	1.00931	30	4.64649	0.97972	30	7.29878	1.02473	30	8.54042	0.997121	30	6.94982
P62081	40S ribosomal protein S7	RPS7	40S ribosomal protein S7 OS=Homo sapiens OX=9606 GN=RPS7 PE=1 SV=1 - [RS7_HUMAN]	42.27	8	8	29	194	22.1133	10.0962	1.05617	29	3.54529	1.03676	29	3.83251	1.04461	29	7.99018	0.975653	29	6.16732	0.970221	29	4.94193	0.947309	29	3.37682
P04899	Guanine nucleotide-binding protein G(i) subunit alpha-2	GNAI2	Guanine nucleotide-binding protein G(i) subunit alpha-2 OS=Homo sapiens OX=9606 GN=GNAI2 PE=1 SV=3 - [GNAI2_HUMAN]	47.32	6	14	30	355	40.4251	5.5415	1.06236	12	4.31023	0.997622	12	6.94777	0.996459	12	4.84476	1.02638	12	6.80751	0.964654	12	5.15577	0.963275	12	4.93982
Q9UHB9	Signal recognition particle subunit SRP68	SRP68	Signal recognition particle subunit SRP68 OS=Homo sapiens OX=9606 GN=SRP68 PE=1 SV=2 - [SRP68_HUMAN]	33.49	20	20	30	627	70.6856	8.55811	0.958407	30	5.53023	0.946434	30	4.03117	0.979672	30	4.01314	0.991274	30	7.18671	1.04594	30	6.40623	1.04236	30	7.34065
Q16777	Histone H2A type 2-C	HIST2H2AC	Histone H2A type 2-C OS=Homo sapiens OX=9606 GN=HIST2H2AC PE=1 SV=4 - [H2A2C_HUMAN]	42.64	1	6	48	129	13.9798	10.9019	1.1844	4	1.05877	1.12017	4	1.85257	1.0196	4	4.86494	1.06956	4	1.18147	0.85328	4	2.67559	0.821089	4	3.17449
O75694	Nuclear pore complex protein Nup155	NUP155	Nuclear pore complex protein Nup155 OS=Homo sapiens OX=9606 GN=NUP155 PE=1 SV=1 - [NU155_HUMAN]	15.17	17	17	29	1391	155.1	6.16357	1.0241	29	6.60056	1.0217	29	4.96138	1.03016	29	3.46483	0.996059	29	4.29197	0.963678	29	5.69252	0.951557	29	8.09728
P04908	Histone H2A type 1-B/E	HIST1H2AB	Histone H2A type 1-B/E OS=Homo sapiens OX=9606 GN=HIST1H2AB PE=1 SV=2 - [H2A1B_HUMAN]	43.08	3	7	58	130	14.127	11.0483	1.15848	17	8.41515	1.09856	17	6.9598	1.12522	17	3.94858	0.918732	17	5.40597	0.924691	17	7.37732	0.832213	17	6.43463
P07686	Beta-hexosaminidase subunit beta	HEXB	Beta-hexosaminidase subunit beta OS=Homo sapiens OX=9606 GN=HEXB PE=1 SV=3 - [HEXB_HUMAN]	21.76	11	13	22	556	63.0712	6.75635	1.0483	20	2.70152	0.933897	20	2.96637	0.90946	20	5.31488	1.21739	20	4.6037	0.977864	20	4.85763	0.951225	20	9.03004
Q9BTM1	Histone H2A.J	H2AFJ	Histone H2A.J OS=Homo sapiens OX=9606 GN=H2AFJ PE=1 SV=1 - [H2AJ_HUMAN]	42.64	1	6	45	129	14.0109	10.9019	1.19101	1		0.951122	1		0.929085	1		1.1755	1		0.949499	1		0.862075	1
P69849	Nodal modulator 3	NOMO3	Nodal modulator 3 OS=Homo sapiens OX=9606 GN=NOMO3 PE=3 SV=2 - [NOMO3_HUMAN]	13.83	1	15	28	1222	134.049	5.66846	1.01912	1		1.00143	1		0.98569	1		1.02774	1		0.992974	1		1.00289	1
Q8N766	ER membrane protein complex subunit 1	EMC1	ER membrane protein complex subunit 1 OS=Homo sapiens OX=9606 GN=EMC1 PE=1 SV=1 - [EMC1_HUMAN]	19.54	17	17	33	993	111.689	7.66455	0.968017	33	9.28996	0.919958	33	6.25678	0.94546	33	4.71176	1.11651	33	7.63625	1.02749	33	8.96608	0.993932	33	6.47672
P47755	F-actin-capping protein subunit alpha-2	CAPZA2	F-actin-capping protein subunit alpha-2 OS=Homo sapiens OX=9606 GN=CAPZA2 PE=1 SV=3 - [CAZA2_HUMAN]	49.3	8	10	23	286	32.9286	5.84619	1.02726	18	5.15352	1.00757	18	13.0066	1.05263	18	10.0559	0.965528	18	8.77042	1.00887	18	8.55614	0.999565	18	6.80543
O00303	Eukaryotic translation initiation factor 3 subunit F	EIF3F	Eukaryotic translation initiation factor 3 subunit F OS=Homo sapiens OX=9606 GN=EIF3F PE=1 SV=1 - [EIF3F_HUMAN]	27.17	9	9	16	357	37.5402	5.45264	0.966746	16	5.61601	0.983	16	2.03796	1.00976	16	4.64004	1.02648	16	7.4823	1.02953	16	5.43555	1.03991	16	4.36244
Q14683	Structural maintenance of chromosomes protein 1A	SMC1A	Structural maintenance of chromosomes protein 1A OS=Homo sapiens OX=9606 GN=SMC1A PE=1 SV=2 - [SMC1A_HUMAN]	24.74	33	33	50	1233	143.144	7.63525	1.08522	48	8.68681	1.08006	48	5.97664	1.10095	48	5.94548	0.961915	48	7.50859	0.906067	48	9.67849	0.922177	48	7.62688
Q15056	Eukaryotic translation initiation factor 4H	EIF4H	Eukaryotic translation initiation factor 4H OS=Homo sapiens OX=9606 GN=EIF4H PE=1 SV=5 - [IF4H_HUMAN]	37.1	8	8	22	248	27.3684	7.2251	1.06697	20	8.44004	1.07051	20	3.86118	1.08933	20	7.82786	0.865201	20	13.9314	1.01093	20	4.66772	0.963659	20	5.55499
P25685	DnaJ homolog subfamily B member 1	DNAJB1	DnaJ homolog subfamily B member 1 OS=Homo sapiens OX=9606 GN=DNAJB1 PE=1 SV=4 - [DNJB1_HUMAN]	42.06	14	15	25	340	38.0204	8.63135	1.01968	23	10.5264	1.01642	23	5.2714	1.0429	23	5.35455	0.955236	23	9.32131	0.96172	23	5.68213	0.982086	23	5.82226
P18085	ADP-ribosylation factor 4	ARF4	ADP-ribosylation factor 4 OS=Homo sapiens OX=9606 GN=ARF4 PE=1 SV=3 - [ARF4_HUMAN]	61.11	5	9	18	180	20.4977	7.13721	0.935687	10	6.3223	0.943125	10	2.91117	0.928949	10	2.26898	0.981482	10	5.41775	1.04393	10	4.64626	1.11063	10	5.96621
P83731	60S ribosomal protein L24	RPL24	60S ribosomal protein L24 OS=Homo sapiens OX=9606 GN=RPL24 PE=1 SV=1 - [RL24_HUMAN]	50.32	11	11	35	157	17.7679	11.2534	0.995683	35	10.7205	1.03555	35	6.46713	1.03178	35	6.07202	0.989614	35	7.74001	0.968202	35	10.1333	0.972859	35	6.52162
Q13765	Nascent polypeptide-associated complex subunit alpha	NACA	Nascent polypeptide-associated complex subunit alpha OS=Homo sapiens OX=9606 GN=NACA PE=1 SV=1 - [NACA_HUMAN]	26.51	4	4	10	215	23.3697	4.56396	1.04647	10	7.00704	1.0508	10	3.81602	1.09414	10	3.38303	0.86216	10	6.96035	1.00442	10	5.35221	0.983504	10	5.40107
Q53FA7	Quinone oxidoreductase PIG3	TP53I3	Quinone oxidoreductase PIG3 OS=Homo sapiens OX=9606 GN=TP53I3 PE=1 SV=2 - [QORX_HUMAN]	41.57	13	13	24	332	35.5136	7.1665	0.910995	24	8.46209	0.960969	24	5.31789	0.999614	24	4.64609	0.852341	24	7.84751	1.08724	24	9.91093	1.11095	24	9.61774
P42126	Enoyl-CoA delta isomerase 1, mitochondrial	ECI1	Enoyl-CoA delta isomerase 1, mitochondrial OS=Homo sapiens OX=9606 GN=ECI1 PE=1 SV=1 - [ECI1_HUMAN]	20.86	6	6	14	302	32.7952	8.54346	0.972884	14	3.81732	0.946032	14	21.1906	0.882469	14	12.6418	1.17926	14	16.4459	1.07607	14	10.8132	0.962752	14	6.33818
P30049	ATP synthase subunit delta, mitochondrial	ATP5F1D	ATP synthase subunit delta, mitochondrial OS=Homo sapiens OX=9606 GN=ATP5F1D PE=1 SV=2 - [ATPD_HUMAN]	17.26	2	3	17	168	17.4792	5.49072	1.06425	16	5.1515	0.942814	16	6.10821	0.901495	16	12.7311	1.167	16	10.1721	0.983614	16	5.95916	0.937939	16	4.80843
P11388	DNA topoisomerase 2-alpha	TOP2A	DNA topoisomerase 2-alpha OS=Homo sapiens OX=9606 GN=TOP2A PE=1 SV=3 - [TOP2A_HUMAN]	25.21	26	38	55	1531	174.276	8.71924	1.03759	35	5.94204	1.05771	35	5.93013	1.08084	35	6.50809	1.02075	35	6.80622	0.93371	35	6.16662	0.921792	35	7.7748
P42167	Lamina-associated polypeptide 2, isoforms beta/gamma	TMPO	Lamina-associated polypeptide 2, isoforms beta/gamma OS=Homo sapiens OX=9606 GN=TMPO PE=1 SV=2 - [LAP2B_HUMAN]	41.19	9	16	32	454	50.6395	9.37842	1.01073	13	4.54049	1.02053	13	7.89182	1.04032	13	6.68294	0.98356	13	9.47238	1.04617	13	3.633	0.949413	13	9.72829
P23381	Tryptophan--tRNA ligase, cytoplasmic	WARS	Tryptophan--tRNA ligase, cytoplasmic OS=Homo sapiens OX=9606 GN=WARS PE=1 SV=2 - [SYWC_HUMAN]	22.51	9	9	23	471	53.1316	6.22705	0.923517	23	6.09525	0.939976	23	4.06493	0.985016	23	3.16883	0.972002	23	3.77291	1.07588	23	3.8982	1.07987	23	4.91631
P62495	Eukaryotic peptide chain release factor subunit 1	ETF1	Eukaryotic peptide chain release factor subunit 1 OS=Homo sapiens OX=9606 GN=ETF1 PE=1 SV=3 - [ERF1_HUMAN]	40.27	16	17	41	437	49.0002	5.70654	0.994986	39	7.4333	1.02356	39	3.8691	1.05443	39	5.96511	0.89557	39	7.46397	0.977287	39	5.99949	1.05318	39	5.31005
P11908	Ribose-phosphate pyrophosphokinase 2	PRPS2	Ribose-phosphate pyrophosphokinase 2 OS=Homo sapiens OX=9606 GN=PRPS2 PE=1 SV=2 - [PRPS2_HUMAN]	36.79	4	10	17	318	34.747	6.60986	0.985764	5	1.00483	1.06949	5	4.10779	1.05839	5	3.3001	0.952275	5	11.4937	0.967285	5	5.03961	1.0348	5	1.83589
P41567	Eukaryotic translation initiation factor 1	EIF1	Eukaryotic translation initiation factor 1 OS=Homo sapiens OX=9606 GN=EIF1 PE=1 SV=1 - [EIF1_HUMAN]	53.98	5	5	11	113	12.7246	7.44482	0.908014	11	6.94618	1.06787	11	6.67668	1.01613	11	3.32816	0.953621	11	5.22898	0.998134	11	9.53424	1.06799	11	3.93076
P04179	Superoxide dismutase [Mn], mitochondrial	SOD2	Superoxide dismutase [Mn], mitochondrial OS=Homo sapiens OX=9606 GN=SOD2 PE=1 SV=3 - [SODM_HUMAN]	33.33	9	9	28	222	24.7346	8.25049	0.986907	28	10.769	0.706814	28	16.154	0.687998	28	14.6909	1.70984	28	18.9153	0.96897	28	7.91948	0.950113	28	8.38579
P50416	Carnitine O-palmitoyltransferase 1, liver isoform	CPT1A	Carnitine O-palmitoyltransferase 1, liver isoform OS=Homo sapiens OX=9606 GN=CPT1A PE=1 SV=2 - [CPT1A_HUMAN]	25.61	18	18	31	773	88.3107	8.646	0.90431	31	5.38595	0.907861	31	11.28	0.898705	31	7.11285	1.10432	31	13.1094	1.06667	31	8.62415	1.04817	31	8.2049
P78344	Eukaryotic translation initiation factor 4 gamma 2	EIF4G2	Eukaryotic translation initiation factor 4 gamma 2 OS=Homo sapiens OX=9606 GN=EIF4G2 PE=1 SV=1 - [IF4G2_HUMAN]	21.61	21	21	42	907	102.297	7.13721	0.960303	42	9.23518	0.983352	42	5.48927	0.989175	42	5.74841	1.01025	42	7.56889	1.03402	42	6.64437	1.03234	42	5.61147
O15460	Prolyl 4-hydroxylase subunit alpha-2	P4HA2	Prolyl 4-hydroxylase subunit alpha-2 OS=Homo sapiens OX=9606 GN=P4HA2 PE=1 SV=1 - [P4HA2_HUMAN]	31.03	13	13	26	535	60.8636	5.70654	0.990603	26	7.75851	1.00307	26	6.26059	0.989192	26	6.1879	1.01188	26	5.49548	1.02555	26	7.89387	0.983709	26	5.6047
P12081	Histidine--tRNA ligase, cytoplasmic	HARS	Histidine--tRNA ligase, cytoplasmic OS=Homo sapiens OX=9606 GN=HARS PE=1 SV=2 - [SYHC_HUMAN]	40.08	14	21	40	509	57.3742	5.88428	1.05515	25	6.69759	1.08068	25	4.37576	1.10909	25	5.44535	0.838935	25	6.48782	0.983963	25	5.01609	0.973604	25	5.36661
P13693	Translationally-controlled tumor protein	TPT1	Translationally-controlled tumor protein OS=Homo sapiens OX=9606 GN=TPT1 PE=1 SV=1 - [TCTP_HUMAN]	36.05	6	6	24	172	19.5826	4.93213	1.03259	24	3.83003	1.01313	24	4.35103	1.03908	24	6.09806	0.87759	24	5.79528	1.05401	24	4.59538	1.00993	24	4.79898
Q12860	Contactin-1	CNTN1	Contactin-1 OS=Homo sapiens OX=9606 GN=CNTN1 PE=1 SV=1 - [CNTN1_HUMAN]	30.35	26	26	45	1018	113.249	5.89697	1.13099	44	7.89364	1.09912	44	7.00258	1.10521	44	8.16685	0.931355	44	8.8377	0.894726	44	8.03107	0.900165	44	7.67389
Q3LXA3	Triokinase/FMN cyclase	TKFC	Triokinase/FMN cyclase OS=Homo sapiens OX=9606 GN=TKFC PE=1 SV=2 - [TKFC_HUMAN]	30.09	13	13	22	575	58.91	7.48877	1.03194	22	8.20445	1.02343	22	6.49379	1.0342	22	6.88313	0.928719	22	7.18233	1.00345	22	8.79197	1.00151	22	6.73381
Q9NUU7	ATP-dependent RNA helicase DDX19A	DDX19A	ATP-dependent RNA helicase DDX19A OS=Homo sapiens OX=9606 GN=DDX19A PE=1 SV=1 - [DD19A_HUMAN]	32.22	14	14	28	478	53.9408	6.58057	0.997557	28	7.22608	1.01894	28	7.38273	1.04339	28	3.50378	0.919397	28	5.95696	0.993415	28	8.3429	1.04029	28	6.65814
Q5T4S7	E3 ubiquitin-protein ligase UBR4	UBR4	E3 ubiquitin-protein ligase UBR4 OS=Homo sapiens OX=9606 GN=UBR4 PE=1 SV=1 - [UBR4_HUMAN]	9.05	39	41	56	5183	573.476	6.03662	0.975693	52	8.52719	1.00511	52	4.5915	1.01412	52	7.0184	0.978903	52	7.38409	1.00523	52	5.76268	1.01402	52	7.28929
Q9NVA2	Septin-11	SEPT11	Septin-11 OS=Homo sapiens OX=9606 GN=SEPT11 PE=1 SV=3 - [SEP11_HUMAN]	38.46	6	16	33	429	49.3672	6.81494	0.960242	13	4.53983	0.944319	13	3.09846	0.94449	13	5.02589	1.16327	13	7.62837	0.982798	13	4.70886	1.00005	13	5.12026
Q9H3P7	Golgi resident protein GCP60	ACBD3	Golgi resident protein GCP60 OS=Homo sapiens OX=9606 GN=ACBD3 PE=1 SV=4 - [GCP60_HUMAN]	29.92	13	13	18	528	60.556	5.05908	0.987285	17	7.0231	0.945186	17	4.41112	0.944168	17	7.03779	1.06046	17	7.15371	1.04924	17	6.04537	1.05087	17	5.80262
Q9GZR7	ATP-dependent RNA helicase DDX24	DDX24	ATP-dependent RNA helicase DDX24 OS=Homo sapiens OX=9606 GN=DDX24 PE=1 SV=1 - [DDX24_HUMAN]	28.64	20	20	23	859	96.2715	9.05615	0.970291	23	5.43196	0.995024	23	5.82973	0.977842	23	4.6781	1.07396	23	12.0681	0.97359	23	7.84256	1.01328	23	7.45414
P23368	NAD-dependent malic enzyme, mitochondrial	ME2	NAD-dependent malic enzyme, mitochondrial OS=Homo sapiens OX=9606 GN=ME2 PE=1 SV=1 - [MAOM_HUMAN]	22.6	12	12	26	584	65.4018	7.60596	0.928464	26	9.23625	0.906892	26	8.83772	0.896113	26	5.13515	1.12972	26	9.79707	1.08381	26	6.54253	1.02492	26	6.47961
Q93009	Ubiquitin carboxyl-terminal hydrolase 7	USP7	Ubiquitin carboxyl-terminal hydrolase 7 OS=Homo sapiens OX=9606 GN=USP7 PE=1 SV=2 - [UBP7_HUMAN]	24.41	25	25	41	1102	128.22	5.5542	1.00202	41	8.81618	1.0062	41	6.33135	1.03948	41	5.92518	0.974238	41	6.99656	0.99506	41	5.50731	1.00726	41	7.40661
Q6YHK3	CD109 antigen	CD109	CD109 antigen OS=Homo sapiens OX=9606 GN=CD109 PE=1 SV=2 - [CD109_HUMAN]	15.99	21	22	30	1445	161.587	5.84619	1.05205	29	10.6218	1.03604	29	6.64452	1.05217	29	3.85296	1.02437	29	6.24047	0.957263	29	8.94939	0.947946	29	11.2161
P21964	Catechol O-methyltransferase	COMT	Catechol O-methyltransferase OS=Homo sapiens OX=9606 GN=COMT PE=1 SV=2 - [COMT_HUMAN]	52.03	11	11	25	271	30.0176	5.46533	0.986303	25	6.44254	0.96871	25	7.59904	0.927457	25	1.989	1.13252	25	6.95739	0.988722	25	8.90563	0.976971	25	6.63991
O94925	Glutaminase kidney isoform, mitochondrial	GLS	Glutaminase kidney isoform, mitochondrial OS=Homo sapiens OX=9606 GN=GLS PE=1 SV=1 - [GLSK_HUMAN]	26.16	15	15	31	669	73.4139	7.76709	0.925893	31	7.47224	0.909946	31	3.38898	0.898261	31	6.68954	1.11258	31	6.44507	1.07733	31	7.31405	1.06175	31	6.69507
P84090	Enhancer of rudimentary homolog	ERH	Enhancer of rudimentary homolog OS=Homo sapiens OX=9606 GN=ERH PE=1 SV=1 - [ERH_HUMAN]	50	5	5	26	104	12.251	5.92236	1.00491	26	11.7382	1.03398	26	4.91059	0.981009	26	7.11405	1.02963	26	5.24687	0.989528	26	7.48149	0.940691	26	7.40861
O75828	Carbonyl reductase [NADPH] 3	CBR3	Carbonyl reductase [NADPH] 3 OS=Homo sapiens OX=9606 GN=CBR3 PE=1 SV=3 - [CBR3_HUMAN]	19.86	1	5	13	277	30.8307	6.17627	1.09814	1		1.1056	1		1.10874	1		0.804564	1		0.956172	1		0.985215	1
P12931	Proto-oncogene tyrosine-protein kinase Src	SRC	Proto-oncogene tyrosine-protein kinase Src OS=Homo sapiens OX=9606 GN=SRC PE=1 SV=3 - [SRC_HUMAN]	34.51	9	16	33	536	59.797	7.41553	0.941419	17	12.1703	0.953081	17	3.23016	0.949146	17	3.74894	1.09959	17	6.03943	1.01036	17	8.22353	1.01525	17	8.086
Q5JRA6	Transport and Golgi organization protein 1 homolog	MIA3	Transport and Golgi organization protein 1 homolog OS=Homo sapiens OX=9606 GN=MIA3 PE=1 SV=1 - [TGO1_HUMAN]	16.1	26	27	39	1907	213.57	4.84326	0.994767	37	6.05097	0.948571	37	9.83763	0.955492	37	8.15871	1.13949	37	12.239	1.00673	37	5.01743	0.968978	37	7.75197
P49321	Nuclear autoantigenic sperm protein	NASP	Nuclear autoantigenic sperm protein OS=Homo sapiens OX=9606 GN=NASP PE=1 SV=2 - [NASP_HUMAN]	38.96	23	25	54	788	85.1861	4.29736	1.071	47	5.66747	1.10028	47	7.14198	1.10508	47	7.42256	0.887394	47	6.35287	0.965813	47	9.34002	0.942838	47	5.83831
P60903	Protein S100-A10	S100A10	Protein S100-A10 OS=Homo sapiens OX=9606 GN=S100A10 PE=1 SV=2 - [S10AA_HUMAN]	41.24	5	5	39	97	11.1955	7.37158	1.13575	39	19.1915	0.973886	39	3.94694	1.0063	39	9.4447	1.08932	39	4.09562	0.868772	39	21.8556	0.931746	39	4.68701
P10253	Lysosomal alpha-glucosidase	GAA	Lysosomal alpha-glucosidase OS=Homo sapiens OX=9606 GN=GAA PE=1 SV=4 - [LYAG_HUMAN]	13.55	9	9	17	952	105.257	5.99854	1.05991	17	13.3203	0.899778	17	4.88309	0.924632	17	7.12932	1.27006	17	16.5316	0.961929	17	6.20282	0.954144	17	9.28508
P43246	DNA mismatch repair protein Msh2	MSH2	DNA mismatch repair protein Msh2 OS=Homo sapiens OX=9606 GN=MSH2 PE=1 SV=1 - [MSH2_HUMAN]	23.55	21	22	35	934	104.677	5.77002	1.09034	34	6.76322	1.10639	34	7.15568	1.09126	34	7.21818	0.945571	34	9.11244	0.910483	34	6.2087	0.927294	34	5.68461
Q3ZCQ8	Mitochondrial import inner membrane translocase subunit TIM50	TIMM50	Mitochondrial import inner membrane translocase subunit TIM50 OS=Homo sapiens OX=9606 GN=TIMM50 PE=1 SV=2 - [TIM50_HUMAN]	28.9	11	11	25	353	39.6215	8.36768	0.982182	25	6.73595	0.926423	25	7.17007	0.902636	25	4.61247	1.12271	25	9.89541	1.07253	25	5.31806	1.01178	25	6.64374
Q9UKM9	RNA-binding protein Raly	RALY	RNA-binding protein Raly OS=Homo sapiens OX=9606 GN=RALY PE=1 SV=1 - [RALY_HUMAN]	47.39	15	15	36	306	32.4436	9.17334	1.05874	35	5.87309	0.993486	35	5.22528	0.999978	35	4.00023	1.04442	35	8.74559	0.962193	35	4.94716	0.978328	35	4.8639
P49755	Transmembrane emp24 domain-containing protein 10	TMED10	Transmembrane emp24 domain-containing protein 10 OS=Homo sapiens OX=9606 GN=TMED10 PE=1 SV=2 - [TMEDA_HUMAN]	37.44	6	7	26	219	24.96	7.44482	1.00901	25	5.53646	0.924421	25	6.87992	0.943739	25	9.7718	1.20528	25	13.6863	0.992226	25	8.80758	0.964373	25	5.88565
Q9Y5S9	RNA-binding protein 8A	RBM8A	RNA-binding protein 8A OS=Homo sapiens OX=9606 GN=RBM8A PE=1 SV=1 - [RBM8A_HUMAN]	46.55	6	6	15	174	19.8767	5.71924	1.01566	15	7.87841	0.993552	15	4.10208	1.01198	15	1.91738	1.00447	15	10.6784	1.02733	15	7.81291	0.962414	15	5.72774
P14927	Cytochrome b-c1 complex subunit 7	UQCRB	Cytochrome b-c1 complex subunit 7 OS=Homo sapiens OX=9606 GN=UQCRB PE=1 SV=2 - [QCR7_HUMAN]	62.16	9	9	28	111	13.522	8.77783	0.955132	28	7.0541	0.903014	28	5.09382	0.897542	28	5.84039	1.17599	28	6.11301	1.07872	28	11.0697	0.984818	28	2.80742
Q9BWF3	RNA-binding protein 4	RBM4	RNA-binding protein 4 OS=Homo sapiens OX=9606 GN=RBM4 PE=1 SV=1 - [RBM4_HUMAN]	37.36	13	13	21	364	40.2887	7.07861	0.982537	21	5.21901	0.971336	21	5.216	0.982475	21	6.25379	0.985163	21	8.27311	1.0525	21	8.80076	1.0518	21	3.56595
P55327	Tumor protein D52	TPD52	Tumor protein D52 OS=Homo sapiens OX=9606 GN=TPD52 PE=1 SV=2 - [TPD52_HUMAN]	39.73	7	7	17	224	24.3122	4.83057	1.01904	17	6.25799	1.03224	17	7.09064	1.03861	17	8.22871	0.920807	17	7.97479	0.995542	17	5.05757	1.04083	17	6.33484
Q9UHG3	Prenylcysteine oxidase 1	PCYOX1	Prenylcysteine oxidase 1 OS=Homo sapiens OX=9606 GN=PCYOX1 PE=1 SV=3 - [PCYOX_HUMAN]	30.5	13	13	29	505	56.6037	6.17627	0.890536	29	9.44889	0.87105	29	5.52789	0.91146	29	4.44882	1.20875	29	10.3822	1.03957	29	7.05989	1.02566	29	8.29215
Q92887	Canalicular multispecific organic anion transporter 1	ABCC2	Canalicular multispecific organic anion transporter 1 OS=Homo sapiens OX=9606 GN=ABCC2 PE=1 SV=3 - [MRP2_HUMAN]	15.34	22	22	46	1545	174.096	8.32373	1.03504	46	8.02648	0.980264	46	3.43611	0.982162	46	3.90039	1.09462	46	8.10057	0.964895	46	7.36385	0.989183	46	6.30651
O75534	Cold shock domain-containing protein E1	CSDE1	Cold shock domain-containing protein E1 OS=Homo sapiens OX=9606 GN=CSDE1 PE=1 SV=2 - [CSDE1_HUMAN]	31.33	23	23	42	798	88.8289	6.25244	1.01607	41	9.10696	1.02195	41	4.79243	1.05216	41	8.91233	0.931796	41	7.72214	0.999149	41	8.84253	1.01837	41	7.30073
P00387	NADH-cytochrome b5 reductase 3	CYB5R3	NADH-cytochrome b5 reductase 3 OS=Homo sapiens OX=9606 GN=CYB5R3 PE=1 SV=3 - [NB5R3_HUMAN]	36.88	10	10	22	301	34.2127	7.59131	1.00938	22	4.08615	0.902671	22	7.69588	0.924777	22	3.97319	1.18078	22	11.5604	1.02602	22	5.41449	0.959097	22	2.77253
O94973	AP-2 complex subunit alpha-2	AP2A2	AP-2 complex subunit alpha-2 OS=Homo sapiens OX=9606 GN=AP2A2 PE=1 SV=2 - [AP2A2_HUMAN]	25.24	10	22	39	939	103.895	6.96143	1.00417	14	10.8394	0.988935	14	5.02663	0.967293	14	4.56523	1.06576	14	7.35829	0.974048	14	3.93704	0.985313	14	7.91329
P62316	Small nuclear ribonucleoprotein Sm D2	SNRPD2	Small nuclear ribonucleoprotein Sm D2 OS=Homo sapiens OX=9606 GN=SNRPD2 PE=1 SV=1 - [SMD2_HUMAN]	61.86	8	8	38	118	13.5182	9.90576	1.04606	38	5.78019	1.01477	38	4.72767	1.00213	38	6.11194	1.03931	38	5.49938	1.01242	38	6.75144	0.947238	38	7.22966
Q9BTT0	Acidic leucine-rich nuclear phosphoprotein 32 family member E	ANP32E	Acidic leucine-rich nuclear phosphoprotein 32 family member E OS=Homo sapiens OX=9606 GN=ANP32E PE=1 SV=1 - [AN32E_HUMAN]	28.73	6	6	10	268	30.6738	3.85303	1.1382	10	14.927	1.11733	10	6.45724	1.18924	10	4.78782	0.864683	10	6.69062	0.8653	10	22.1404	0.863892	10	11.6143
Q14376	UDP-glucose 4-epimerase	GALE	UDP-glucose 4-epimerase OS=Homo sapiens OX=9606 GN=GALE PE=1 SV=2 - [GALE_HUMAN]	25.29	8	8	15	348	38.2573	6.72705	1.0583	15	7.54564	1.03253	15	6.1583	1.02259	15	4.51203	0.937821	15	6.35464	0.97289	15	3.87741	1.01548	15	5.98837
O43865	S-adenosylhomocysteine hydrolase-like protein 1	AHCYL1	S-adenosylhomocysteine hydrolase-like protein 1 OS=Homo sapiens OX=9606 GN=AHCYL1 PE=1 SV=2 - [SAHH2_HUMAN]	30.57	14	15	28	530	58.9134	6.88818	1.06192	22	5.26912	1.03962	22	3.62497	1.07127	22	7.80139	0.965398	22	7.62921	0.937289	22	8.19626	0.971706	22	6.93774
Q9H4G0	Band 4.1-like protein 1	EPB41L1	Band 4.1-like protein 1 OS=Homo sapiens OX=9606 GN=EPB41L1 PE=1 SV=2 - [E41L1_HUMAN]	21.11	15	17	35	881	98.4422	5.61768	1.00846	32	6.92553	0.946494	32	7.12742	0.979081	32	4.16991	1.07191	32	9.09797	0.991206	32	4.38076	0.996384	32	5.91853
Q13439	Golgin subfamily A member 4	GOLGA4	Golgin subfamily A member 4 OS=Homo sapiens OX=9606 GN=GOLGA4 PE=1 SV=1 - [GOGA4_HUMAN]	17.58	38	38	44	2230	260.98	5.38916	1.0315	44	5.31307	1.07193	44	6.4763	1.0444	44	6.32215	0.941344	44	6.20032	0.98984	44	5.49451	0.958192	44	4.65943
Q9NQ29	Putative RNA-binding protein Luc7-like 1	LUC7L	Putative RNA-binding protein Luc7-like 1 OS=Homo sapiens OX=9606 GN=LUC7L PE=1 SV=1 - [LUC7L_HUMAN]	29.65	5	10	26	371	43.7013	9.92041	0.965674	7	3.89015	1.05673	7	3.1891	1.07133	7	5.26327	0.903832	7	7.30309	0.990138	7	5.9054	0.976485	7	3.27029
P23193	Transcription elongation factor A protein 1	TCEA1	Transcription elongation factor A protein 1 OS=Homo sapiens OX=9606 GN=TCEA1 PE=1 SV=2 - [TCEA1_HUMAN]	38.21	13	13	28	301	33.948	8.38232	0.996777	28	6.45114	1.00262	28	7.82695	0.998146	28	5.45843	1.0724	28	6.30208	0.973127	28	4.44619	0.967825	28	6.75463
P20340	Ras-related protein Rab-6A	RAB6A	Ras-related protein Rab-6A OS=Homo sapiens OX=9606 GN=RAB6A PE=1 SV=3 - [RAB6A_HUMAN]	35.1	4	8	27	208	23.5779	5.5415	0.957853	10	5.40402	0.861168	10	5.58012	0.880637	10	4.94174	1.19631	10	6.49639	1.03657	10	3.25201	1.0377	10	5.47442
P50454	Serpin H1	SERPINH1	Serpin H1 OS=Homo sapiens OX=9606 GN=SERPINH1 PE=1 SV=2 - [SERPH_HUMAN]	36.36	13	13	22	418	46.4112	8.68994	0.960915	22	6.33168	1.00906	22	5.15562	0.978164	22	6.38294	1.02947	22	6.66514	0.996716	22	7.48963	1.01726	22	6.11314
A0MZ66	Shootin-1	SHTN1	Shootin-1 OS=Homo sapiens OX=9606 GN=SHTN1 PE=1 SV=4 - [SHOT1_HUMAN]	28.84	19	19	30	631	71.5957	5.32568	1.03187	30	5.45386	1.08336	30	4.68337	1.09707	30	8.56763	0.900584	30	10.4327	0.967898	30	7.71182	0.956304	30	5.09818
P78417	Glutathione S-transferase omega-1	GSTO1	Glutathione S-transferase omega-1 OS=Homo sapiens OX=9606 GN=GSTO1 PE=1 SV=2 - [GSTO1_HUMAN]	48.96	15	15	39	241	27.548	6.59521	1.10458	39	9.30847	1.05504	39	3.80683	1.07585	39	5.93406	0.875857	39	10.4828	0.916751	39	4.73121	0.978434	39	6.73157
Q07020	60S ribosomal protein L18	RPL18	60S ribosomal protein L18 OS=Homo sapiens OX=9606 GN=RPL18 PE=1 SV=2 - [RL18_HUMAN]	36.7	6	6	20	188	21.6211	11.7222	0.956654	20	16.5209	0.989299	20	5.42992	0.963136	20	9.90009	1.02248	20	11.0698	0.967166	20	14.4305	1.04329	20	14.6625
Q7Z2W4	Zinc finger CCCH-type antiviral protein 1	ZC3HAV1	Zinc finger CCCH-type antiviral protein 1 OS=Homo sapiens OX=9606 GN=ZC3HAV1 PE=1 SV=3 - [ZCCHV_HUMAN]	21.95	18	18	25	902	101.367	8.39697	1.02585	25	8.16934	1.07515	25	5.85254	1.05598	25	4.60535	0.947398	25	6.75926	0.951764	25	6.77061	0.974703	25	10.4006
P39748	Flap endonuclease 1	FEN1	Flap endonuclease 1 OS=Homo sapiens OX=9606 GN=FEN1 PE=1 SV=1 - [FEN1_HUMAN]	39.47	14	14	31	380	42.5661	8.6167	1.10419	31	10.1674	1.1105	31	14.0201	1.11236	31	10.7869	0.906732	31	12.3212	0.946188	31	9.25222	0.919549	31	11.1276
O75822	Eukaryotic translation initiation factor 3 subunit J	EIF3J	Eukaryotic translation initiation factor 3 subunit J OS=Homo sapiens OX=9606 GN=EIF3J PE=1 SV=2 - [EIF3J_HUMAN]	48.45	12	12	21	258	29.0445	4.83057	0.97616	20	7.20671	0.972469	20	6.23898	0.968955	20	6.10125	0.980915	20	8.69416	1.06375	20	7.74917	1.00534	20	11.0418
Q8TCT9	Minor histocompatibility antigen H13	HM13	Minor histocompatibility antigen H13 OS=Homo sapiens OX=9606 GN=HM13 PE=1 SV=1 - [HM13_HUMAN]	19.36	8	8	27	377	41.4616	6.43018	0.982943	27	9.35028	0.910523	27	9.54175	0.916146	27	8.32133	1.2534	27	6.83519	0.985293	27	11.5211	0.984456	27	7.07663
Q99436	Proteasome subunit beta type-7	PSMB7	Proteasome subunit beta type-7 OS=Homo sapiens OX=9606 GN=PSMB7 PE=1 SV=1 - [PSB7_HUMAN]	17.69	4	4	26	277	29.9462	7.6792	1.01649	26	4.54024	1.02832	26	8.22276	1.00051	26	5.22524	0.948044	26	8.74839	1.05677	26	3.05549	0.969337	26	4.1893
P62070	Ras-related protein R-Ras2	RRAS2	Ras-related protein R-Ras2 OS=Homo sapiens OX=9606 GN=RRAS2 PE=1 SV=1 - [RRAS2_HUMAN]	39.71	5	7	15	204	23.3847	6.01123	0.910233	6	7.6194	0.850138	6	7.77464	0.886825	6	6.66878	1.13081	6	6.86817	1.12902	6	3.12844	1.07132	6	4.90669
Q8TCJ2	Dolichyl-diphosphooligosaccharide--protein glycosyltransferase subunit STT3B	STT3B	Dolichyl-diphosphooligosaccharide--protein glycosyltransferase subunit STT3B OS=Homo sapiens OX=9606 GN=STT3B PE=1 SV=1 - [STT3B_HUMAN]	15.62	13	14	35	826	93.6137	8.90967	1.03291	32	7.23602	0.961698	32	5.24355	0.986523	32	6.24619	1.13911	32	6.80436	0.95251	32	5.5816	0.97201	32	7.24907
Q96CT7	Coiled-coil domain-containing protein 124	CCDC124	Coiled-coil domain-containing protein 124 OS=Homo sapiens OX=9606 GN=CCDC124 PE=1 SV=1 - [CC124_HUMAN]	45.29	10	10	17	223	25.8196	9.53955	1.04239	17	3.49934	1.07554	17	4.18992	1.07785	17	5.50077	0.944382	17	12.8724	0.945629	17	9.76229	0.958816	17	2.99421
P50579	Methionine aminopeptidase 2	METAP2	Methionine aminopeptidase 2 OS=Homo sapiens OX=9606 GN=METAP2 PE=1 SV=1 - [MAP2_HUMAN]	42.05	14	14	26	478	52.8581	5.8208	0.968416	24	5.91638	0.996915	24	4.48502	1.00973	24	6.58367	0.996346	24	7.30062	1.05876	24	7.53258	1.02682	24	6.52095
Q05193	Dynamin-1	DNM1	Dynamin-1 OS=Homo sapiens OX=9606 GN=DNM1 PE=1 SV=2 - [DYN1_HUMAN]	29.98	16	30	44	864	97.347	7.1665	1.03881	22	10.1794	1.10384	22	6.72011	1.14017	22	8.31201	0.890042	22	8.56077	0.944364	22	7.01744	0.945845	22	6.74858
Q9GZS3	WD repeat-containing protein 61	WDR61	WD repeat-containing protein 61 OS=Homo sapiens OX=9606 GN=WDR61 PE=1 SV=1 - [WDR61_HUMAN]	32.79	7	7	15	305	33.5598	5.46533	1.01025	15	5.35857	1.04765	15	4.24874	0.996361	15	4.24294	0.969523	15	7.71206	1.01034	15	5.90267	1.0005	15	8.51774
P43034	Platelet-activating factor acetylhydrolase IB subunit alpha	PAFAH1B1	Platelet-activating factor acetylhydrolase IB subunit alpha OS=Homo sapiens OX=9606 GN=PAFAH1B1 PE=1 SV=2 - [LIS1_HUMAN]	37.56	11	12	31	410	46.6082	7.37158	1.01958	28	5.59365	1.0201	28	3.6165	1.02356	28	5.36344	0.924735	28	7.52972	0.998081	28	4.92744	1.04232	28	6.94045
Q92597	Protein NDRG1	NDRG1	Protein NDRG1 OS=Homo sapiens OX=9606 GN=NDRG1 PE=1 SV=1 - [NDRG1_HUMAN]	23.35	6	6	16	394	42.8077	5.8208	0.959005	16	13.9658	1.10251	16	5.51865	1.08011	16	8.7041	0.837001	16	12.2103	0.966602	16	7.51856	1.0231	16	12.5046
Q9H9J2	39S ribosomal protein L44, mitochondrial	MRPL44	39S ribosomal protein L44, mitochondrial OS=Homo sapiens OX=9606 GN=MRPL44 PE=1 SV=1 - [RM44_HUMAN]	25.6	7	7	12	332	37.5117	8.39697	0.974868	12	5.70145	0.983637	12	11.632	0.942849	12	7.42097	1.01968	12	8.418	1.0199	12	6.6837	1.03484	12	5.32115
P47813	Eukaryotic translation initiation factor 1A, X-chromosomal	EIF1AX	Eukaryotic translation initiation factor 1A, X-chromosomal OS=Homo sapiens OX=9606 GN=EIF1AX PE=1 SV=2 - [IF1AX_HUMAN]	37.5	7	7	28	144	16.4502	5.23682	1.01779	28	5.46972	1.01279	28	5.37507	1.01338	28	5.64972	0.977717	28	5.53636	1.02973	28	8.3274	0.990927	28	3.10954
P10301	Ras-related protein R-Ras	RRAS	Ras-related protein R-Ras OS=Homo sapiens OX=9606 GN=RRAS PE=1 SV=1 - [RRAS_HUMAN]	40.37	7	9	19	218	23.4659	6.93213	0.996339	10	8.47405	0.914341	10	7.96457	0.980994	10	5.69019	1.0231	10	9.94165	0.987765	10	8.24293	0.987944	10	13.187
Q6YN16	Hydroxysteroid dehydrogenase-like protein 2	HSDL2	Hydroxysteroid dehydrogenase-like protein 2 OS=Homo sapiens OX=9606 GN=HSDL2 PE=1 SV=1 - [HSDL2_HUMAN]	33.25	11	11	21	418	45.3655	7.98682	0.98549	21	9.57389	0.95269	21	6.32766	0.962799	21	5.2395	1.08443	21	11.068	0.967579	21	6.78232	0.970765	21	5.44353
O75431	Metaxin-2	MTX2	Metaxin-2 OS=Homo sapiens OX=9606 GN=MTX2 PE=1 SV=1 - [MTX2_HUMAN]	29.66	7	7	14	263	29.7441	6.29053	1.01673	14	25.3048	0.960078	14	8.48016	0.924419	14	10.8873	1.11311	14	6.61989	1.06148	14	11.2437	0.928481	14	6.31309
Q9BYT8	Neurolysin, mitochondrial	NLN	Neurolysin, mitochondrial OS=Homo sapiens OX=9606 GN=NLN PE=1 SV=1 - [NEUL_HUMAN]	32.39	22	22	36	704	80.5997	6.63916	1.00149	36	5.98566	1.03026	36	5.87955	1.03318	36	5.96414	0.967329	36	8.08338	1.00042	36	4.3968	1.00418	36	5.11387
P48506	Glutamate--cysteine ligase catalytic subunit	GCLC	Glutamate--cysteine ligase catalytic subunit OS=Homo sapiens OX=9606 GN=GCLC PE=1 SV=2 - [GSH1_HUMAN]	25.12	13	14	26	637	72.7193	6.0874	1.03044	25	7.42746	1.08685	25	3.89334	1.13519	25	7.73833	0.810227	25	12.3322	0.969014	25	6.67868	1.01177	25	7.35803
Q13618	Cullin-3	CUL3	Cullin-3 OS=Homo sapiens OX=9606 GN=CUL3 PE=1 SV=2 - [CUL3_HUMAN]	25.78	21	22	33	768	88.8735	8.48486	0.970606	32	6.79689	1.05098	32	7.45271	1.05758	32	4.84095	0.904313	32	8.09636	1.00205	32	7.63948	1.02978	32	6.91256
O15355	Protein phosphatase 1G	PPM1G	Protein phosphatase 1G OS=Homo sapiens OX=9606 GN=PPM1G PE=1 SV=1 - [PPM1G_HUMAN]	31.32	13	13	27	546	59.2347	4.36084	1.06778	27	5.92326	1.06397	27	6.7003	1.06624	27	4.40728	0.93924	27	8.43992	0.96879	27	6.85637	0.966325	27	10.5222
O75116	Rho-associated protein kinase 2	ROCK2	Rho-associated protein kinase 2 OS=Homo sapiens OX=9606 GN=ROCK2 PE=1 SV=4 - [ROCK2_HUMAN]	26.3	33	37	49	1388	160.799	6.02393	1.01404	44	7.84256	1.06498	44	6.79207	1.08728	45	6.82925	0.898393	44	10.406	0.955957	44	7.26515	0.962029	44	9.00323
Q15758	Neutral amino acid transporter B(0)	SLC1A5	Neutral amino acid transporter B(0) OS=Homo sapiens OX=9606 GN=SLC1A5 PE=1 SV=2 - [AAAT_HUMAN]	15.9	8	8	25	541	56.5623	5.47803	0.957024	25	5.98959	0.954577	25	5.41156	0.910935	25	4.81395	1.15043	25	6.6291	1.00147	25	7.50943	0.981766	25	4.60572
Q96AG4	Leucine-rich repeat-containing protein 59	LRRC59	Leucine-rich repeat-containing protein 59 OS=Homo sapiens OX=9606 GN=LRRC59 PE=1 SV=1 - [LRC59_HUMAN]	44.95	14	14	32	307	34.9089	9.56885	0.959432	32	5.55246	0.940389	32	5.4289	0.945998	32	5.0926	1.14215	32	7.43495	1.0609	32	6.26675	0.971221	32	3.97554
Q9BQE5	Apolipoprotein L2	APOL2	Apolipoprotein L2 OS=Homo sapiens OX=9606 GN=APOL2 PE=1 SV=1 - [APOL2_HUMAN]	32.94	12	12	23	337	37.0694	6.7417	0.996264	23	5.33568	0.931865	23	7.29253	0.894495	23	8.64955	1.14706	23	15.9843	0.985793	23	9.23388	1.06031	23	9.22531
Q8NDI1	EH domain-binding protein 1	EHBP1	EH domain-binding protein 1 OS=Homo sapiens OX=9606 GN=EHBP1 PE=1 SV=3 - [EHBP1_HUMAN]	16.08	16	17	23	1231	139.931	5.35107	1.10324	20	9.18064	1.08719	20	6.67987	1.09698	20	5.12294	0.962339	20	6.34042	0.921977	20	9.31127	0.915224	20	6.23448
P13674	Prolyl 4-hydroxylase subunit alpha-1	P4HA1	Prolyl 4-hydroxylase subunit alpha-1 OS=Homo sapiens OX=9606 GN=P4HA1 PE=1 SV=2 - [P4HA1_HUMAN]	29.03	15	15	26	534	61.011	6.01123	1.00506	26	9.11224	0.988981	26	3.57929	0.943735	26	3.87452	1.09901	26	7.93481	0.995767	26	4.16781	0.978319	26	5.09417
O14672	Disintegrin and metalloproteinase domain-containing protein 10	ADAM10	Disintegrin and metalloproteinase domain-containing protein 10 OS=Homo sapiens OX=9606 GN=ADAM10 PE=1 SV=1 - [ADA10_HUMAN]	22.59	14	14	25	748	84.0877	7.76709	1.05098	25	7.2997	1.02099	25	4.95602	1.02284	25	3.19419	1.03789	25	6.19776	0.938565	25	13.0256	0.937	25	7.83529
P06396	Gelsolin	GSN	Gelsolin OS=Homo sapiens OX=9606 GN=GSN PE=1 SV=1 - [GELS_HUMAN]	24.81	19	19	33	782	85.6442	6.27783	0.99817	33	7.85152	0.979061	33	4.85797	1.0242	33	4.87226	0.979254	33	6.80545	0.993759	33	9.18519	1.02575	33	6.44119
P30622	CAP-Gly domain-containing linker protein 1	CLIP1	CAP-Gly domain-containing linker protein 1 OS=Homo sapiens OX=9606 GN=CLIP1 PE=1 SV=2 - [CLIP1_HUMAN]	20.79	26	28	43	1438	162.147	5.36377	0.989766	41	5.08063	0.994784	41	7.69439	0.977749	41	6.16565	1.00931	41	7.9032	1.03019	41	6.79495	1.01026	41	6.0837
Q02978	Mitochondrial 2-oxoglutarate/malate carrier protein	SLC25A11	Mitochondrial 2-oxoglutarate/malate carrier protein OS=Homo sapiens OX=9606 GN=SLC25A11 PE=1 SV=3 - [M2OM_HUMAN]	30.57	8	8	15	314	34.0399	9.90576	0.886237	15	8.51834	0.914973	15	12.382	0.899323	15	9.7731	1.12538	15	18.7476	1.06403	15	13.3376	1.04973	15	15.1534
P07305	Histone H1.0	H1F0	Histone H1.0 OS=Homo sapiens OX=9606 GN=H1F0 PE=1 SV=3 - [H10_HUMAN]	30.93	6	6	19	194	20.8502	10.8433	0.990454	19	3.98763	0.859523	19	8.46522	0.855317	19	10.3407	1.22998	19	9.42898	0.989202	19	4.95344	1.03291	19	2.38162
P32322	Pyrroline-5-carboxylate reductase 1, mitochondrial	PYCR1	Pyrroline-5-carboxylate reductase 1, mitochondrial OS=Homo sapiens OX=9606 GN=PYCR1 PE=1 SV=2 - [P5CR1_HUMAN]	32.92	6	7	12	319	33.3396	7.60596	0.929308	10	2.99379	0.943771	10	6.5666	0.937977	10	5.14401	1.1565	10	6.01352	1.04363	10	7.16377	1.01974	10	6.98031
O15067	Phosphoribosylformylglycinamidine synthase	PFAS	Phosphoribosylformylglycinamidine synthase OS=Homo sapiens OX=9606 GN=PFAS PE=1 SV=4 - [PUR4_HUMAN]	16.52	19	19	33	1338	144.643	5.75732	1.03363	33	9.56222	1.09174	33	7.43618	1.09854	33	10.5763	0.83982	33	10.4324	0.962747	33	7.98094	1.00588	33	9.92833
P46776	60S ribosomal protein L27a	RPL27A	60S ribosomal protein L27a OS=Homo sapiens OX=9606 GN=RPL27A PE=1 SV=2 - [RL27A_HUMAN]	35.14	6	6	22	148	16.551	11.0044	0.932453	22	7.40119	1.01584	22	2.67304	0.97608	22	7.70596	1.12115	22	8.59143	0.904178	22	11.9002	1.06359	22	7.90888
Q9Y305	Acyl-coenzyme A thioesterase 9, mitochondrial	ACOT9	Acyl-coenzyme A thioesterase 9, mitochondrial OS=Homo sapiens OX=9606 GN=ACOT9 PE=1 SV=2 - [ACOT9_HUMAN]	32.35	14	14	29	439	49.8695	8.60205	0.924427	29	9.46668	0.897471	29	8.14637	0.903211	29	8.66944	1.14407	29	10.802	1.04456	29	5.98257	1.04426	29	5.03474
Q9P258	Protein RCC2	RCC2	Protein RCC2 OS=Homo sapiens OX=9606 GN=RCC2 PE=1 SV=2 - [RCC2_HUMAN]	28.54	14	14	27	522	56.0492	8.77783	1.0199	27	5.47423	1.04906	27	3.46533	1.09871	27	4.38882	0.917093	27	6.00778	0.972536	27	5.71097	0.97449	27	2.16344
P35613	Basigin	BSG	Basigin OS=Homo sapiens OX=9606 GN=BSG PE=1 SV=2 - [BASI_HUMAN]	26.23	9	9	27	385	42.1741	5.65576	1.03888	27	12.5934	0.942383	27	8.90686	0.978296	27	8.21216	1.07056	27	11.8727	0.949074	27	7.05135	0.933841	27	8.40781
Q9Y570	Protein phosphatase methylesterase 1	PPME1	Protein phosphatase methylesterase 1 OS=Homo sapiens OX=9606 GN=PPME1 PE=1 SV=3 - [PPME1_HUMAN]	44.82	16	16	29	386	42.2882	5.97314	1.0076	29	9.27845	1.00136	29	5.78618	1.03731	29	4.23968	0.898124	29	8.75964	1.01519	29	6.53042	1.05242	29	5.02132
Q12929	Epidermal growth factor receptor kinase substrate 8	EPS8	Epidermal growth factor receptor kinase substrate 8 OS=Homo sapiens OX=9606 GN=EPS8 PE=1 SV=1 - [EPS8_HUMAN]	21.78	15	15	18	822	91.8244	7.50342	1.01716	18	9.10809	1.02288	18	9.63649	0.98332	18	7.48952	1.05658	18	10.9015	0.99973	18	5.29684	0.980979	18	4.04717
Q7L2H7	Eukaryotic translation initiation factor 3 subunit M	EIF3M	Eukaryotic translation initiation factor 3 subunit M OS=Homo sapiens OX=9606 GN=EIF3M PE=1 SV=1 - [EIF3M_HUMAN]	27.27	9	9	14	374	42.4758	5.63037	0.981893	13	6.45389	0.982375	13	2.73639	1.02568	13	4.1015	0.956924	13	7.81283	1.06407	13	3.95789	1.05676	13	7.25016
P25789	Proteasome subunit alpha type-4	PSMA4	Proteasome subunit alpha type-4 OS=Homo sapiens OX=9606 GN=PSMA4 PE=1 SV=1 - [PSA4_HUMAN]	42.91	11	11	38	261	29.4652	7.72314	1.02197	38	9.64054	1.00587	38	3.68053	1.02381	38	5.98462	0.941496	38	6.99594	0.989829	38	6.88375	1.01537	38	7.28014
O60749	Sorting nexin-2	SNX2	Sorting nexin-2 OS=Homo sapiens OX=9606 GN=SNX2 PE=1 SV=2 - [SNX2_HUMAN]	22.16	11	13	24	519	58.4347	5.12256	0.937444	21	5.56826	0.985179	21	3.75678	1.02679	21	4.72783	0.941358	21	7.43142	1.05177	21	7.73057	1.05926	21	7.15527
P10620	Microsomal glutathione S-transferase 1	MGST1	Microsomal glutathione S-transferase 1 OS=Homo sapiens OX=9606 GN=MGST1 PE=1 SV=1 - [MGST1_HUMAN]	27.1	4	4	15	155	17.5872	9.39307	0.870556	15	15.1708	0.881535	15	10.8488	0.911049	15	7.36663	1.02388	15	10.5204	1.04928	15	13.2931	1.17621	15	6.34032
P62277	40S ribosomal protein S13	RPS13	40S ribosomal protein S13 OS=Homo sapiens OX=9606 GN=RPS13 PE=1 SV=2 - [RS13_HUMAN]	56.95	10	10	32	151	17.2117	10.5356	1.0655	32	6.16675	1.01884	32	4.04992	1.05356	32	3.78959	1.02798	32	4.00716	0.981258	32	2.24069	0.911268	32	6.24268
Q10472	Polypeptide N-acetylgalactosaminyltransferase 1	GALNT1	Polypeptide N-acetylgalactosaminyltransferase 1 OS=Homo sapiens OX=9606 GN=GALNT1 PE=1 SV=1 - [GALT1_HUMAN]	20.93	8	11	19	559	64.1774	7.72314	1.04441	16	5.056	1.0093	16	4.61052	1.02805	16	4.48222	0.98215	16	4.97497	0.969771	16	7.80902	0.987784	16	5.48352
Q9HCC0	Methylcrotonoyl-CoA carboxylase beta chain, mitochondrial	MCCC2	Methylcrotonoyl-CoA carboxylase beta chain, mitochondrial OS=Homo sapiens OX=9606 GN=MCCC2 PE=1 SV=1 - [MCCB_HUMAN]	23.27	12	12	25	563	61.2944	7.6792	0.979326	25	6.83583	0.939242	25	6.22683	0.936783	25	4.69751	1.07732	25	10.2365	1.03579	25	5.54025	0.974935	25	3.92579
P54727	UV excision repair protein RAD23 homolog B	RAD23B	UV excision repair protein RAD23 homolog B OS=Homo sapiens OX=9606 GN=RAD23B PE=1 SV=1 - [RD23B_HUMAN]	27.38	9	11	26	409	43.1446	4.84326	1.04116	19	8.1482	1.06731	19	6.08501	1.05633	19	6.39426	0.888529	19	8.91018	0.984069	19	3.43115	0.981798	19	5.36208
P51812	Ribosomal protein S6 kinase alpha-3	RPS6KA3	Ribosomal protein S6 kinase alpha-3 OS=Homo sapiens OX=9606 GN=RPS6KA3 PE=1 SV=1 - [KS6A3_HUMAN]	34.73	17	26	42	740	83.6829	6.88818	1.02493	27	7.54978	1.07539	27	4.81257	1.09879	27	6.93388	0.89969	27	7.62361	0.95368	27	10.3101	0.96791	27	8.95928
P54886	Delta-1-pyrroline-5-carboxylate synthase	ALDH18A1	Delta-1-pyrroline-5-carboxylate synthase OS=Homo sapiens OX=9606 GN=ALDH18A1 PE=1 SV=2 - [P5CS_HUMAN]	28.55	21	21	40	795	87.2475	7.12256	0.962801	40	6.90427	0.945837	40	4.30833	0.961708	40	5.68922	1.04201	40	8.08118	1.04016	40	8.11168	1.0527	40	6.28914
A0FGR8	Extended synaptotagmin-2	ESYT2	Extended synaptotagmin-2 OS=Homo sapiens OX=9606 GN=ESYT2 PE=1 SV=1 - [ESYT2_HUMAN]	13.03	10	10	17	921	102.294	9.26123	0.982579	17	7.68054	0.944583	17	9.15006	0.920766	17	9.29433	1.08903	17	7.20138	1.06083	17	6.27633	1.00615	17	5.07343
Q68CZ2	Tensin-3	TNS3	Tensin-3 OS=Homo sapiens OX=9606 GN=TNS3 PE=1 SV=2 - [TENS3_HUMAN]	14.12	15	18	26	1445	155.169	6.81494	1.05799	19	6.22463	1.12277	19	8.37003	1.11214	19	4.43709	0.844223	19	12.8637	0.946106	19	5.96601	0.944524	19	7.69259
P35080	Profilin-2	PFN2	Profilin-2 OS=Homo sapiens OX=9606 GN=PFN2 PE=1 SV=3 - [PROF2_HUMAN]	31.43	4	4	13	140	15.0363	6.99072	1.03917	13	6.40633	1.00384	13	10.1115	1.02641	13	5.18501	0.933092	13	13.9997	0.982815	13	8.56007	1.01509	13	8.10411
P63167	Dynein light chain 1, cytoplasmic	DYNLL1	Dynein light chain 1, cytoplasmic OS=Homo sapiens OX=9606 GN=DYNLL1 PE=1 SV=1 - [DYL1_HUMAN]	44.94	2	3	17	89	10.3591	7.40088	1.01166	16	5.61748	1.04549	16	4.51426	1.05284	16	4.05653	0.975444	16	7.37557	0.966615	16	5.88504	0.987434	16	5.37697
P39656	Dolichyl-diphosphooligosaccharide--protein glycosyltransferase 48 kDa subunit	DDOST	Dolichyl-diphosphooligosaccharide--protein glycosyltransferase 48 kDa subunit OS=Homo sapiens OX=9606 GN=DDOST PE=1 SV=4 - [OST48_HUMAN]	24.34	11	11	22	456	50.769	6.55127	1.00171	22	6.17218	0.948954	22	4.78761	0.95271	22	6.13141	1.11265	22	6.607	1.0065	22	5.28408	0.977223	22	7.36345
P49207	60S ribosomal protein L34	RPL34	60S ribosomal protein L34 OS=Homo sapiens OX=9606 GN=RPL34 PE=1 SV=3 - [RL34_HUMAN]	41.88	6	6	33	117	13.2845	11.4731	1.03649	33	6.99244	1.02791	33	6.08496	1.03454	33	9.10248	0.96688	33	7.00978	0.980645	33	6.42985	0.961933	33	4.47562
P14678	Small nuclear ribonucleoprotein-associated proteins B and B'	SNRPB	Small nuclear ribonucleoprotein-associated proteins B and B' OS=Homo sapiens OX=9606 GN=SNRPB PE=1 SV=2 - [RSMB_HUMAN]	27.5	7	7	24	240	24.5937	11.1948	1.01815	24	5.25368	0.986829	24	5.4369	0.96593	24	7.96552	1.03811	24	8.46387	0.999266	24	5.3967	1.00929	24	5.05709
P61313	60S ribosomal protein L15	RPL15	60S ribosomal protein L15 OS=Homo sapiens OX=9606 GN=RPL15 PE=1 SV=2 - [RL15_HUMAN]	47.55	12	12	31	204	24.1311	11.6196	0.972649	31	9.56678	1.01565	31	3.50393	1.02953	31	4.18201	1.02805	31	6.52053	0.97039	31	11.6065	0.980103	31	5.72163
Q9HC38	Glyoxalase domain-containing protein 4	GLOD4	Glyoxalase domain-containing protein 4 OS=Homo sapiens OX=9606 GN=GLOD4 PE=1 SV=1 - [GLOD4_HUMAN]	39.62	12	12	30	313	34.7713	5.60498	1.06583	30	9.43509	1.0577	30	5.10574	1.09943	30	6.96742	0.870145	30	11.9235	0.949852	30	5.32333	0.999976	30	4.5634
Q9UBI6	Guanine nucleotide-binding protein G(I)/G(S)/G(O) subunit gamma-12	GNG12	Guanine nucleotide-binding protein G(I)/G(S)/G(O) subunit gamma-12 OS=Homo sapiens OX=9606 GN=GNG12 PE=1 SV=3 - [GBG12_HUMAN]	59.72	3	4	18	72	8.00117	8.96826	1.00581	16	3.8665	0.943216	16	5.19559	0.95948	16	6.60229	1.04058	16	10.5196	1.04932	16	5.47528	1.01843	16	8.94441
Q15942	Zyxin	ZYX	Zyxin OS=Homo sapiens OX=9606 GN=ZYX PE=1 SV=1 - [ZYX_HUMAN]	33.22	13	13	17	572	61.2382	6.66846	0.871337	17	11.702	0.988221	17	9.96315	0.981321	17	3.49868	0.946744	17	9.17825	1.00447	17	5.66375	1.15136	17	11.6635
O75976	Carboxypeptidase D	CPD	Carboxypeptidase D OS=Homo sapiens OX=9606 GN=CPD PE=1 SV=2 - [CBPD_HUMAN]	17.9	23	23	29	1380	152.835	6.04932	1.02064	28	9.7004	0.999785	29	4.95301	1.01372	29	4.89364	1.04448	29	5.92322	0.962424	29	5.73404	0.969252	29	7.4426
Q8IY81	pre-rRNA 2'-O-ribose RNA methyltransferase FTSJ3	FTSJ3	pre-rRNA 2'-O-ribose RNA methyltransferase FTSJ3 OS=Homo sapiens OX=9606 GN=FTSJ3 PE=1 SV=2 - [SPB1_HUMAN]	24.2	16	16	30	847	96.4992	8.39697	1.04809	30	5.81987	1.03678	30	7.31553	1.0184	30	7.23389	1.02924	30	8.49735	0.96622	30	5.02391	0.953905	30	7.67848
P46977	Dolichyl-diphosphooligosaccharide--protein glycosyltransferase subunit STT3A	STT3A	Dolichyl-diphosphooligosaccharide--protein glycosyltransferase subunit STT3A OS=Homo sapiens OX=9606 GN=STT3A PE=1 SV=2 - [STT3A_HUMAN]	14.75	11	12	25	705	80.4768	8.07471	0.955881	23	8.80055	0.943225	23	4.62522	0.953952	23	4.38896	1.16249	23	5.81973	1.00175	23	7.41786	1.03218	23	9.12351
P30419	Glycylpeptide N-tetradecanoyltransferase 1	NMT1	Glycylpeptide N-tetradecanoyltransferase 1 OS=Homo sapiens OX=9606 GN=NMT1 PE=1 SV=2 - [NMT1_HUMAN]	25.2	8	12	26	496	56.7699	7.79639	0.945893	17	8.3738	0.948688	17	7.8551	0.976165	17	9.27342	0.978366	17	15.1465	0.989618	17	10.4867	1.05376	17	4.94939
Q16543	Hsp90 co-chaperone Cdc37	CDC37	Hsp90 co-chaperone Cdc37 OS=Homo sapiens OX=9606 GN=CDC37 PE=1 SV=1 - [CDC37_HUMAN]	29.37	11	11	21	378	44.44	5.24951	1.05318	21	5.69489	1.02783	21	2.82364	1.05499	21	3.71292	0.92181	21	4.0182	0.996777	21	2.38486	0.989013	21	3.41593
P61163	Alpha-centractin	ACTR1A	Alpha-centractin OS=Homo sapiens OX=9606 GN=ACTR1A PE=1 SV=1 - [ACTZ_HUMAN]	34.31	8	13	56	376	42.5869	6.63916	0.978843	15	9.0719	0.963449	15	8.22285	0.990821	15	4.01402	1.01239	15	5.09043	1.06057	15	8.37055	0.995026	15	3.64084
P62910	60S ribosomal protein L32	RPL32	60S ribosomal protein L32 OS=Homo sapiens OX=9606 GN=RPL32 PE=1 SV=2 - [RL32_HUMAN]	43.7	6	6	23	135	15.8498	11.3267	0.986663	23	6.80017	1.04247	23	6.12771	1.02046	23	8.97344	0.961588	23	11.0368	0.983603	23	5.45741	1.01772	23	4.57942
O95571	Persulfide dioxygenase ETHE1, mitochondrial	ETHE1	Persulfide dioxygenase ETHE1, mitochondrial OS=Homo sapiens OX=9606 GN=ETHE1 PE=1 SV=2 - [ETHE1_HUMAN]	38.98	7	7	18	254	27.8551	6.82959	0.963866	18	6.53329	0.882652	18	5.92278	0.878273	18	7.44446	1.23667	18	10.3749	1.02823	18	5.77261	1.03095	18	6.07009
Q92599	Septin-8	SEPT8	Septin-8 OS=Homo sapiens OX=9606 GN=SEPT8 PE=1 SV=4 - [SEPT8_HUMAN]	25.05	7	12	24	483	55.7211	6.27783	0.974362	10	10.6836	1.00583	9	6.66004	1.00372	10	3.23469	1.04907	9	7.85213	1.00165	10	13.99	1.03887	9	4.46068
O75400	Pre-mRNA-processing factor 40 homolog A	PRPF40A	Pre-mRNA-processing factor 40 homolog A OS=Homo sapiens OX=9606 GN=PRPF40A PE=1 SV=2 - [PR40A_HUMAN]	16.61	16	16	27	957	108.737	7.56201	0.993947	27	9.22726	1.02603	27	3.69745	1.01868	27	5.38098	1.04966	27	4.92996	0.928053	27	6.25262	0.988571	27	6.30394
O75439	Mitochondrial-processing peptidase subunit beta	PMPCB	Mitochondrial-processing peptidase subunit beta OS=Homo sapiens OX=9606 GN=PMPCB PE=1 SV=2 - [MPPB_HUMAN]	32.11	12	13	22	489	54.3315	6.82959	0.979891	21	5.79588	0.978396	21	10.6439	0.931151	21	5.43943	1.07011	21	8.96215	1.04641	21	4.71884	1.02382	21	6.40751
Q5SSJ5	Heterochromatin protein 1-binding protein 3	HP1BP3	Heterochromatin protein 1-binding protein 3 OS=Homo sapiens OX=9606 GN=HP1BP3 PE=1 SV=1 - [HP1B3_HUMAN]	32.37	19	19	40	553	61.1693	9.67139	1.08252	40	9.0349	1.11141	40	7.31636	1.10738	40	7.60149	0.975478	40	9.32116	0.914045	40	8.33082	0.917303	40	10.9971
Q15836	Vesicle-associated membrane protein 3	VAMP3	Vesicle-associated membrane protein 3 OS=Homo sapiens OX=9606 GN=VAMP3 PE=1 SV=3 - [VAMP3_HUMAN]	40	1	3	7	100	11.302	8.79248	0.91396	2	0.13887	0.982003	2	15.5894	0.906208	2	8.09293	1.11808	2	10.2202	1.0052	2	6.85754	1.05966	2	12.2888
P12955	Xaa-Pro dipeptidase	PEPD	Xaa-Pro dipeptidase OS=Homo sapiens OX=9606 GN=PEPD PE=1 SV=3 - [PEPD_HUMAN]	27.59	12	12	20	493	54.5129	5.99854	1.08474	19	4.76179	1.06058	19	5.34495	1.06287	19	6.50323	0.888969	19	10.1145	0.956535	19	4.99045	0.976369	19	8.33196
Q9H6S3	Epidermal growth factor receptor kinase substrate 8-like protein 2	EPS8L2	Epidermal growth factor receptor kinase substrate 8-like protein 2 OS=Homo sapiens OX=9606 GN=EPS8L2 PE=1 SV=2 - [ES8L2_HUMAN]	27.41	18	18	27	715	80.5701	6.84424	0.969046	27	4.22667	1.02087	27	7.15894	1.01304	27	7.43428	0.886013	27	12.518	1.00727	27	4.72078	1.06315	27	5.12743
Q9NZB2	Constitutive coactivator of PPAR-gamma-like protein 1	FAM120A	Constitutive coactivator of PPAR-gamma-like protein 1 OS=Homo sapiens OX=9606 GN=FAM120A PE=1 SV=2 - [F120A_HUMAN]	16.64	15	15	24	1118	121.811	8.88037	0.978872	24	10.3667	1.0275	24	5.88524	1.05829	24	5.07867	0.976613	24	6.757	0.95981	24	5.76169	0.97463	24	7.75476
P19525	Interferon-induced, double-stranded RNA-activated protein kinase	EIF2AK2	Interferon-induced, double-stranded RNA-activated protein kinase OS=Homo sapiens OX=9606 GN=EIF2AK2 PE=1 SV=2 - [E2AK2_HUMAN]	32.85	15	15	21	551	62.0556	8.39697	1.03401	19	5.99891	1.02411	19	4.89091	1.0227	19	4.18758	0.991564	19	6.49632	0.971322	19	3.51139	0.967001	19	4.49175
Q9NS69	Mitochondrial import receptor subunit TOM22 homolog	TOMM22	Mitochondrial import receptor subunit TOM22 homolog OS=Homo sapiens OX=9606 GN=TOMM22 PE=1 SV=3 - [TOM22_HUMAN]	40.85	3	3	10	142	15.5118	4.33545	0.980182	10	10.696	0.987446	10	4.74095	0.924283	10	5.04955	1.16844	10	11.6118	1.08278	10	4.20487	0.914506	10	14.4684
P62244	40S ribosomal protein S15a	RPS15A	40S ribosomal protein S15a OS=Homo sapiens OX=9606 GN=RPS15A PE=1 SV=2 - [RS15A_HUMAN]	58.46	8	8	21	130	14.83	10.1255	1.00504	21	9.07082	1.04446	21	8.82011	0.997892	21	9.18717	1.05354	21	10.2457	0.938593	21	8.22521	0.953897	21	6.72436
O15382	Branched-chain-amino-acid aminotransferase, mitochondrial	BCAT2	Branched-chain-amino-acid aminotransferase, mitochondrial OS=Homo sapiens OX=9606 GN=BCAT2 PE=1 SV=2 - [BCAT2_HUMAN]	31.12	10	10	22	392	44.2591	8.646	1.01706	22	4.91247	0.92566	22	4.69047	0.947079	22	3.71982	1.11811	22	6.83596	1.03621	22	5.58108	0.995077	22	5.81547
Q70UQ0	Inhibitor of nuclear factor kappa-B kinase-interacting protein	IKBIP	Inhibitor of nuclear factor kappa-B kinase-interacting protein OS=Homo sapiens OX=9606 GN=IKBIP PE=1 SV=1 - [IKIP_HUMAN]	32.57	10	11	21	350	39.285	9.17334	0.927803	20	6.4997	0.915833	20	7.08225	0.917882	20	8.22516	1.13392	20	6.62991	1.07709	20	5.28589	1.04695	20	4.94639
P30837	Aldehyde dehydrogenase X, mitochondrial	ALDH1B1	Aldehyde dehydrogenase X, mitochondrial OS=Homo sapiens OX=9606 GN=ALDH1B1 PE=1 SV=3 - [AL1B1_HUMAN]	33.08	13	16	52	517	57.1702	6.80029	0.926785	20	4.87634	0.820354	20	7.80701	0.84486	20	7.75999	1.24348	20	10.9447	1.10431	20	9.38837	1.04158	20	3.62258
Q96AY3	Peptidyl-prolyl cis-trans isomerase FKBP10	FKBP10	Peptidyl-prolyl cis-trans isomerase FKBP10 OS=Homo sapiens OX=9606 GN=FKBP10 PE=1 SV=1 - [FKB10_HUMAN]	24.4	11	12	21	582	64.2042	5.61768	0.987475	20	7.93257	1.0054	20	10.1148	1.00248	20	4.74821	1.03354	20	6.57443	1.02038	20	3.67614	0.915993	20	6.89181
P62269	40S ribosomal protein S18	RPS18	40S ribosomal protein S18 OS=Homo sapiens OX=9606 GN=RPS18 PE=1 SV=3 - [RS18_HUMAN]	44.74	9	9	26	152	17.7079	10.9897	0.999693	26	6.94296	1.00967	26	4.5671	1.03573	26	3.47331	1.03476	26	5.47601	0.976286	26	3.62308	0.982888	26	8.22054
Q8TAQ2	SWI/SNF complex subunit SMARCC2	SMARCC2	SWI/SNF complex subunit SMARCC2 OS=Homo sapiens OX=9606 GN=SMARCC2 PE=1 SV=1 - [SMRC2_HUMAN]	17.87	12	17	29	1214	132.797	5.69385	1.05633	16	8.998	1.07604	16	3.33045	1.09018	16	7.81203	0.938925	16	9.43095	0.957111	16	4.04473	0.931425	16	10.2338
P06454	Prothymosin alpha	PTMA	Prothymosin alpha OS=Homo sapiens OX=9606 GN=PTMA PE=1 SV=2 - [PTMA_HUMAN]	36.04	5	5	18	111	12.196	3.77686	1.13502	18	12.8524	1.20842	18	11.7346	1.1259	18	10.0724	0.799139	18	17.5299	0.910497	18	6.11213	0.860104	18	11.2729
O95747	Serine/threonine-protein kinase OSR1	OXSR1	Serine/threonine-protein kinase OSR1 OS=Homo sapiens OX=9606 GN=OXSR1 PE=1 SV=1 - [OXSR1_HUMAN]	13.28	4	6	12	527	57.9861	6.43018	1.00586	9	4.05088	1.05423	9	7.73788	1.04571	9	2.94552	0.817791	9	10.2396	1.07247	9	5.30189	0.997728	9	6.44228
Q9HBL0	Tensin-1	TNS1	Tensin-1 OS=Homo sapiens OX=9606 GN=TNS1 PE=1 SV=2 - [TENS1_HUMAN]	10.49	12	15	22	1735	185.586	7.75244	0.97714	16	7.92467	1.10124	16	6.09893	1.09887	16	8.3519	0.831049	16	13.2079	0.963625	16	6.92504	1.01791	16	5.21306
Q9BRA2	Thioredoxin domain-containing protein 17	TXNDC17	Thioredoxin domain-containing protein 17 OS=Homo sapiens OX=9606 GN=TXNDC17 PE=1 SV=1 - [TXD17_HUMAN]	59.35	6	6	18	123	13.9318	5.51611	0.999202	18	12.5123	1.04715	18	5.69888	1.03848	18	8.30709	0.8829	18	5.54251	0.962831	18	5.96788	1.03192	18	4.58413
Q9NP81	Serine--tRNA ligase, mitochondrial	SARS2	Serine--tRNA ligase, mitochondrial OS=Homo sapiens OX=9606 GN=SARS2 PE=1 SV=1 - [SYSM_HUMAN]	25.1	10	11	19	518	58.2459	8.1333	0.974974	18	3.46201	0.966502	18	8.81881	0.961357	18	7.42298	1.0459	18	10.0848	1.02031	18	3.99027	1.00511	18	5.10595
P26368	Splicing factor U2AF 65 kDa subunit	U2AF2	Splicing factor U2AF 65 kDa subunit OS=Homo sapiens OX=9606 GN=U2AF2 PE=1 SV=4 - [U2AF2_HUMAN]	32.21	12	12	20	475	53.4672	9.08545	0.951994	19	7.68246	0.987368	19	6.11737	0.976683	19	3.48975	1.05716	19	5.04947	1.03609	19	7.46801	1.00933	19	4.41891
Q12907	Vesicular integral-membrane protein VIP36	LMAN2	Vesicular integral-membrane protein VIP36 OS=Homo sapiens OX=9606 GN=LMAN2 PE=1 SV=1 - [LMAN2_HUMAN]	38.2	11	11	24	356	40.2031	6.94678	0.908216	24	8.72303	0.869322	24	14.1475	0.865216	24	11.6225	1.22626	24	11.2332	1.09071	24	7.84312	1.02455	24	3.73975
P36551	Oxygen-dependent coproporphyrinogen-III oxidase, mitochondrial	CPOX	Oxygen-dependent coproporphyrinogen-III oxidase, mitochondrial OS=Homo sapiens OX=9606 GN=CPOX PE=1 SV=3 - [HEM6_HUMAN]	31.28	11	11	26	454	50.12	8.25049	0.998121	26	6.61598	0.94464	26	4.04875	0.902597	26	4.96134	1.14346	26	8.19968	1.04303	26	6.4713	0.961575	26	5.70532
Q14116	Interleukin-18	IL18	Interleukin-18 OS=Homo sapiens OX=9606 GN=IL18 PE=1 SV=1 - [IL18_HUMAN]	34.72	7	7	24	193	22.3118	4.66553	1.04605	24	4.8456	1.03139	24	7.69087	1.07665	24	7.68266	0.871837	24	11.9209	1.0003	24	4.98226	1.01683	24	6.76054
Q8WWI1	LIM domain only protein 7	LMO7	LIM domain only protein 7 OS=Homo sapiens OX=9606 GN=LMO7 PE=1 SV=3 - [LMO7_HUMAN]	15.21	24	24	45	1683	192.576	8.08936	0.939058	45	8.72576	0.911125	45	6.95687	0.932079	45	5.37151	1.16749	45	9.24855	1.00277	45	6.91442	1.02382	45	7.26873
O75746	Calcium-binding mitochondrial carrier protein Aralar1	SLC25A12	Calcium-binding mitochondrial carrier protein Aralar1 OS=Homo sapiens OX=9606 GN=SLC25A12 PE=1 SV=2 - [CMC1_HUMAN]	17.26	5	11	20	678	74.7149	8.38232	0.946375	9	7.46219	0.883667	9	5.19499	0.937883	9	7.18054	1.0931	9	11.0244	1.07046	9	6.32087	1.03558	9	3.14746
P30626	Sorcin	SRI	Sorcin OS=Homo sapiens OX=9606 GN=SRI PE=1 SV=1 - [SORCN_HUMAN]	43.43	7	7	19	198	21.6624	5.59229	1.00474	19	10.3709	1.09145	19	4.89711	1.05927	19	6.85598	0.869021	19	15.8963	0.989337	19	6.05211	1.0269	19	8.55307
Q9HAV7	GrpE protein homolog 1, mitochondrial	GRPEL1	GrpE protein homolog 1, mitochondrial OS=Homo sapiens OX=9606 GN=GRPEL1 PE=1 SV=2 - [GRPE1_HUMAN]	43.32	10	10	32	217	24.2639	8.11865	0.904713	32	4.09285	0.837973	32	8.2971	0.850192	32	9.64514	1.24807	32	7.22375	1.11297	32	5.12642	1.02145	32	2.35038
P63000	Ras-related C3 botulinum toxin substrate 1	RAC1	Ras-related C3 botulinum toxin substrate 1 OS=Homo sapiens OX=9606 GN=RAC1 PE=1 SV=1 - [RAC1_HUMAN]	45.31	9	10	32	192	21.4362	8.49951	1.05615	28	5.60229	0.998865	28	4.86311	1.00591	28	5.95612	1.0202	28	6.90732	0.961313	28	7.0336	0.954514	28	6.49497
Q9UHV9	Prefoldin subunit 2	PFDN2	Prefoldin subunit 2 OS=Homo sapiens OX=9606 GN=PFDN2 PE=1 SV=1 - [PFD2_HUMAN]	63.64	9	9	19	154	16.6376	6.58057	1.04491	19	4.80941	1.00312	19	4.21649	1.03543	19	3.48562	0.960624	19	6.29412	1.02444	19	3.96743	0.997012	19	4.20333
Q8IUE6	Histone H2A type 2-B	HIST2H2AB	Histone H2A type 2-B OS=Homo sapiens OX=9606 GN=HIST2H2AB PE=1 SV=3 - [H2A2B_HUMAN]	47.69	2	6	33	130	13.9868	10.8872	1.16664	6	8.23445	1.05904	6	8.49968	1.04073	6	6.03047	0.987651	6	6.9014	0.841981	6	5.46916	0.9599	6	8.41108
P61224	Ras-related protein Rap-1b	RAP1B	Ras-related protein Rap-1b OS=Homo sapiens OX=9606 GN=RAP1B PE=1 SV=1 - [RAP1B_HUMAN]	41.3	4	8	22	184	20.8116	5.78271	0.99915	12	7.44961	0.904013	12	3.24491	0.937367	12	4.92078	1.18479	12	5.88465	1.02927	12	14.6357	0.968152	12	6.08245
Q8NF37	Lysophosphatidylcholine acyltransferase 1	LPCAT1	Lysophosphatidylcholine acyltransferase 1 OS=Homo sapiens OX=9606 GN=LPCAT1 PE=1 SV=2 - [PCAT1_HUMAN]	17.98	8	8	10	534	59.1134	6.02393	0.932755	10	9.15645	0.98761	10	15.6159	0.907698	10	7.08589	1.083	10	8.91123	0.991833	10	11.7108	1.05289	10	4.85778
P51116	Fragile X mental retardation syndrome-related protein 2	FXR2	Fragile X mental retardation syndrome-related protein 2 OS=Homo sapiens OX=9606 GN=FXR2 PE=1 SV=2 - [FXR2_HUMAN]	24.52	11	14	21	673	74.178	6.22705	0.98568	15	7.01154	0.9511	15	6.50773	0.980374	15	5.70802	1.07025	15	6.55371	1.02739	15	9.16322	1.05057	15	6.51982
P46109	Crk-like protein	CRKL	Crk-like protein OS=Homo sapiens OX=9606 GN=CRKL PE=1 SV=1 - [CRKL_HUMAN]	27.72	7	7	9	303	33.7559	6.7417	1.03226	9	6.36001	0.994804	9	4.82984	1.03879	9	6.94461	0.934139	9	7.63088	0.990147	9	1.63667	1.03452	9	3.77642
Q96CM8	Acyl-CoA synthetase family member 2, mitochondrial	ACSF2	Acyl-CoA synthetase family member 2, mitochondrial OS=Homo sapiens OX=9606 GN=ACSF2 PE=1 SV=2 - [ACSF2_HUMAN]	25.37	12	12	22	615	68.0808	7.54736	1.01048	22	5.7619	0.966386	22	5.06718	0.97961	22	3.81274	1.10774	22	7.14825	0.964173	22	7.35519	0.94225	22	9.0059
P50213	Isocitrate dehydrogenase [NAD] subunit alpha, mitochondrial	IDH3A	Isocitrate dehydrogenase [NAD] subunit alpha, mitochondrial OS=Homo sapiens OX=9606 GN=IDH3A PE=1 SV=1 - [IDH3A_HUMAN]	33.61	13	13	28	366	39.5661	6.91748	0.970267	28	4.50437	0.88187	28	5.15116	0.897635	28	11.2159	1.18074	28	10.9746	1.01842	28	5.24249	1.00948	28	4.39535
Q13616	Cullin-1	CUL1	Cullin-1 OS=Homo sapiens OX=9606 GN=CUL1 PE=1 SV=2 - [CUL1_HUMAN]	16.75	12	12	19	776	89.622	8.00146	1.00006	19	6.76087	1.0281	19	3.54854	1.03407	19	2.48744	0.942345	19	6.9176	0.990333	19	6.27186	1.02743	19	6.50939
P49189	4-trimethylaminobutyraldehyde dehydrogenase	ALDH9A1	4-trimethylaminobutyraldehyde dehydrogenase OS=Homo sapiens OX=9606 GN=ALDH9A1 PE=1 SV=3 - [AL9A1_HUMAN]	25.3	11	11	25	494	53.767	5.87158	1.02947	25	9.03078	0.983654	25	5.65423	1.0203	25	3.0986	1.01733	25	3.71512	0.97356	25	3.87277	1.00083	25	6.22809
P08559	Pyruvate dehydrogenase E1 component subunit alpha, somatic form, mitochondrial	PDHA1	Pyruvate dehydrogenase E1 component subunit alpha, somatic form, mitochondrial OS=Homo sapiens OX=9606 GN=PDHA1 PE=1 SV=3 - [ODPA_HUMAN]	40.77	15	15	23	390	43.2676	8.06006	0.951995	23	7.95063	0.906823	23	3.98427	0.91223	23	3.45865	1.20184	23	6.46532	1.03786	23	5.98721	0.980362	23	4.82808
P19404	NADH dehydrogenase [ubiquinone] flavoprotein 2, mitochondrial	NDUFV2	NADH dehydrogenase [ubiquinone] flavoprotein 2, mitochondrial OS=Homo sapiens OX=9606 GN=NDUFV2 PE=1 SV=2 - [NDUV2_HUMAN]	29.72	7	7	18	249	27.374	8.06006	0.990032	18	9.84026	0.924878	18	4.88133	0.915136	18	4.30892	1.14995	18	5.89624	1.01858	18	5.79764	0.992676	18	4.00893
Q16531	DNA damage-binding protein 1	DDB1	DNA damage-binding protein 1 OS=Homo sapiens OX=9606 GN=DDB1 PE=1 SV=1 - [DDB1_HUMAN]	25.18	27	27	45	1140	126.887	5.26221	1.01508	45	8.23778	0.973763	45	6.00494	1.031	45	7.16898	0.930806	45	5.72351	1.02613	45	8.57712	1.02927	45	6.98896
P17096	High mobility group protein HMG-I/HMG-Y	HMGA1	High mobility group protein HMG-I/HMG-Y OS=Homo sapiens OX=9606 GN=HMGA1 PE=1 SV=3 - [HMGA1_HUMAN]	48.6	5	5	30	107	11.6691	10.3159	1.02842	30	6.62533	0.896186	30	5.36909	0.921491	30	5.26366	1.18431	30	10.9157	0.965316	30	5.9958	1.0122	30	7.07709
P33992	DNA replication licensing factor MCM5	MCM5	DNA replication licensing factor MCM5 OS=Homo sapiens OX=9606 GN=MCM5 PE=1 SV=5 - [MCM5_HUMAN]	22.21	15	15	26	734	82.2332	8.36768	1.11553	26	9.11778	1.14109	26	7.51132	1.13364	26	8.4755	0.861433	26	9.86645	0.93141	26	7.96406	0.925639	26	5.89818
Q6DD88	Atlastin-3	ATL3	Atlastin-3 OS=Homo sapiens OX=9606 GN=ATL3 PE=1 SV=1 - [ATLA3_HUMAN]	22.18	10	10	21	541	60.5034	5.65576	0.96778	21	7.06721	0.906642	21	7.08194	0.899287	21	3.52069	1.17242	21	7.74993	1.05629	21	8.35054	0.985358	21	6.07823
P37268	Squalene synthase	FDFT1	Squalene synthase OS=Homo sapiens OX=9606 GN=FDFT1 PE=1 SV=1 - [FDFT_HUMAN]	31.18	10	10	18	417	48.0842	6.53662	0.65417	18	22.2194	0.682183	18	18.535	0.64481	18	12.9677	1.44718	18	9.62286	1.2188	18	16.0431	1.22035	18	6.80642
Q9UKK9	ADP-sugar pyrophosphatase	NUDT5	ADP-sugar pyrophosphatase OS=Homo sapiens OX=9606 GN=NUDT5 PE=1 SV=1 - [NUDT5_HUMAN]	40.18	9	9	19	219	24.3122	4.94482	1.03148	19	9.21086	1.01222	19	6.08324	1.02226	19	5.04954	0.899449	19	5.69814	0.972435	19	6.11912	1.07346	19	6.62833
Q6NUK1	Calcium-binding mitochondrial carrier protein SCaMC-1	SLC25A24	Calcium-binding mitochondrial carrier protein SCaMC-1 OS=Homo sapiens OX=9606 GN=SLC25A24 PE=1 SV=2 - [SCMC1_HUMAN]	30.19	15	15	22	477	53.3203	6.32861	0.947154	22	12.3482	0.973739	22	8.07453	0.95024	22	9.82066	1.26166	22	15.7106	0.928807	22	11.1911	0.941092	22	18.9258
P53701	Cytochrome c-type heme lyase	HCCS	Cytochrome c-type heme lyase OS=Homo sapiens OX=9606 GN=HCCS PE=1 SV=1 - [CCHL_HUMAN]	34.7	8	8	14	268	30.5818	6.68311	0.894475	14	7.31737	0.828629	14	12.8369	0.830634	14	8.54578	1.2514	14	9.68859	1.1224	14	9.13202	1.09174	14	2.98765
Q14677	Clathrin interactor 1	CLINT1	Clathrin interactor 1 OS=Homo sapiens OX=9606 GN=CLINT1 PE=1 SV=1 - [EPN4_HUMAN]	24	15	15	31	625	68.2158	6.41748	1.0148	31	7.42592	0.980006	31	5.30544	1.04327	31	4.72815	1.03827	31	6.55596	1.0046	31	8.88085	0.952392	31	3.80762
P51665	26S proteasome non-ATPase regulatory subunit 7	PSMD7	26S proteasome non-ATPase regulatory subunit 7 OS=Homo sapiens OX=9606 GN=PSMD7 PE=1 SV=2 - [PSMD7_HUMAN]	32.72	8	8	15	324	37.0025	6.771	0.945097	15	7.42685	0.981063	15	9.81489	1.01562	15	4.30224	0.961695	15	10.2986	1.01651	15	9.09621	1.06408	15	4.36664
P55265	Double-stranded RNA-specific adenosine deaminase	ADAR	Double-stranded RNA-specific adenosine deaminase OS=Homo sapiens OX=9606 GN=ADAR PE=1 SV=4 - [DSRAD_HUMAN]	21.86	27	27	55	1226	135.981	8.646	1.01303	55	6.44885	0.98335	55	4.92999	1.00572	55	5.54467	1.0613	55	6.3378	0.96702	55	6.24332	0.9735	55	4.94273
P28288	ATP-binding cassette sub-family D member 3	ABCD3	ATP-binding cassette sub-family D member 3 OS=Homo sapiens OX=9606 GN=ABCD3 PE=1 SV=1 - [ABCD3_HUMAN]	23.37	14	15	20	659	75.4276	9.36377	1.05701	19	5.15043	0.991319	19	5.39996	0.996703	19	3.22529	1.16521	19	10.3269	0.940731	19	12.0124	0.937244	19	5.17208
P06703	Protein S100-A6	S100A6	Protein S100-A6 OS=Homo sapiens OX=9606 GN=S100A6 PE=1 SV=1 - [S10A6_HUMAN]	34.44	5	5	57	90	10.1733	5.47803	1.0905	57	6.80811	0.973249	57	5.79352	0.983916	57	4.90556	0.891608	57	9.9126	1.00597	57	5.61955	1.03836	57	5.15365
Q92734	Protein TFG	TFG	Protein TFG OS=Homo sapiens OX=9606 GN=TFG PE=1 SV=2 - [TFG_HUMAN]	21.25	8	8	21	400	43.4212	5.09717	0.992738	15	4.44425	0.979651	15	4.89754	1.03579	15	3.62373	0.964221	15	5.46763	1.00715	15	4.75967	1.01118	15	4.89856
Q9BUQ8	Probable ATP-dependent RNA helicase DDX23	DDX23	Probable ATP-dependent RNA helicase DDX23 OS=Homo sapiens OX=9606 GN=DDX23 PE=1 SV=3 - [DDX23_HUMAN]	25.61	19	19	27	820	95.5239	9.5542	1.04181	27	10.3669	1.01235	27	5.84034	1.03954	27	4.54572	0.978964	27	8.70549	0.969323	27	3.90503	0.997727	27	7.8258
Q709C8	Vacuolar protein sorting-associated protein 13C	VPS13C	Vacuolar protein sorting-associated protein 13C OS=Homo sapiens OX=9606 GN=VPS13C PE=1 SV=1 - [VP13C_HUMAN]	7.06	24	25	41	3753	422.124	6.82959	1.01555	37	7.41999	1.02266	37	7.82755	1.00703	37	4.78801	0.978859	37	9.05941	0.977912	37	9.42615	1.0168	37	8.40591
Q53GQ0	Very-long-chain 3-oxoacyl-CoA reductase	HSD17B12	Very-long-chain 3-oxoacyl-CoA reductase OS=Homo sapiens OX=9606 GN=HSD17B12 PE=1 SV=2 - [DHB12_HUMAN]	41.67	12	12	24	312	34.3022	9.31982	0.823601	24	19.3717	0.871214	24	11.1107	0.860119	24	10.7572	1.17546	24	14.2145	1.05958	24	13.2881	1.02996	24	4.94891
Q00688	Peptidyl-prolyl cis-trans isomerase FKBP3	FKBP3	Peptidyl-prolyl cis-trans isomerase FKBP3 OS=Homo sapiens OX=9606 GN=FKBP3 PE=1 SV=1 - [FKBP3_HUMAN]	45.09	11	11	24	224	25.1613	9.27588	1.07077	24	6.04754	1.06687	24	3.43655	1.09115	24	6.64377	0.907966	24	3.94672	0.991225	24	3.68559	0.942333	24	3.37814
Q9HB71	Calcyclin-binding protein	CACYBP	Calcyclin-binding protein OS=Homo sapiens OX=9606 GN=CACYBP PE=1 SV=2 - [CYBP_HUMAN]	63.6	15	16	42	228	26.1936	8.25049	1.03096	40	7.5024	1.04251	40	5.75666	1.05572	40	6.8888	0.858836	40	9.49728	1.00399	40	6.06112	1.02111	40	7.90908
Q04323	UBX domain-containing protein 1	UBXN1	UBX domain-containing protein 1 OS=Homo sapiens OX=9606 GN=UBXN1 PE=1 SV=2 - [UBXN1_HUMAN]	26.94	6	7	14	297	33.3049	5.24951	1.04723	8	5.56945	1.02706	8	9.94536	0.989142	8	6.56504	0.931444	8	11.4931	0.994104	8	5.35981	1.03278	8	9.29046
P49720	Proteasome subunit beta type-3	PSMB3	Proteasome subunit beta type-3 OS=Homo sapiens OX=9606 GN=PSMB3 PE=1 SV=2 - [PSB3_HUMAN]	25.37	4	4	8	205	22.9335	6.55127	0.900492	8	2.11581	0.974238	8	2.65998	0.996602	8	1.7876	1.0476	8	3.54186	1.04352	8	7.0318	1.09577	8	1.72822
P31949	Protein S100-A11	S100A11	Protein S100-A11 OS=Homo sapiens OX=9606 GN=S100A11 PE=1 SV=2 - [S10AB_HUMAN]	49.52	5	5	24	105	11.7328	7.12256	1.0076	24	9.15212	1.00319	24	3.6248	0.988646	24	4.93178	0.931029	24	10.684	1.00578	24	7.7604	1.07821	24	5.87774
O00154	Cytosolic acyl coenzyme A thioester hydrolase	ACOT7	Cytosolic acyl coenzyme A thioester hydrolase OS=Homo sapiens OX=9606 GN=ACOT7 PE=1 SV=3 - [BACH_HUMAN]	26.58	8	8	17	380	41.7693	8.54346	0.958133	17	6.35855	0.98577	17	6.69466	1.01556	17	6.39083	0.909638	17	5.70361	1.02071	17	7.44454	1.08384	17	8.63603
P20339	Ras-related protein Rab-5A	RAB5A	Ras-related protein Rab-5A OS=Homo sapiens OX=9606 GN=RAB5A PE=1 SV=2 - [RAB5A_HUMAN]	40.47	3	6	16	215	23.6438	8.14795	0.97356	5	8.12212	0.940566	5	4.66577	0.959599	5	6.9748	1.0261	5	7.47169	1.05715	5	1.62255	0.990472	5	2.12893
Q9NYF8	Bcl-2-associated transcription factor 1	BCLAF1	Bcl-2-associated transcription factor 1 OS=Homo sapiens OX=9606 GN=BCLAF1 PE=1 SV=2 - [BCLF1_HUMAN]	20.65	15	16	33	920	106.059	9.979	0.985821	28	13.602	1.00124	28	5.91499	0.999992	28	7.02369	0.99167	28	10.0888	0.991305	28	11.9385	1.00914	28	7.01346
P11310	Medium-chain specific acyl-CoA dehydrogenase, mitochondrial	ACADM	Medium-chain specific acyl-CoA dehydrogenase, mitochondrial OS=Homo sapiens OX=9606 GN=ACADM PE=1 SV=1 - [ACADM_HUMAN]	18.76	7	7	18	421	46.5586	8.36768	0.932541	18	6.48533	0.949485	18	6.78376	0.908785	18	3.93425	1.13675	18	4.00109	1.05248	18	4.01946	0.976821	18	7.38593
P08579	U2 small nuclear ribonucleoprotein B''	SNRPB2	U2 small nuclear ribonucleoprotein B'' OS=Homo sapiens OX=9606 GN=SNRPB2 PE=1 SV=1 - [RU2B_HUMAN]	31.11	5	7	15	225	25.4701	9.71533	0.995268	12	6.37771	0.99982	12	5.35703	0.959589	12	7.15692	1.07179	12	11.6328	1.01132	12	12.3625	0.990419	12	4.51287
P55010	Eukaryotic translation initiation factor 5	EIF5	Eukaryotic translation initiation factor 5 OS=Homo sapiens OX=9606 GN=EIF5 PE=1 SV=2 - [IF5_HUMAN]	40.14	18	18	27	431	49.1918	5.57959	0.923566	27	11.5238	0.918564	27	5.01021	0.92061	27	6.07502	1.05956	27	6.00457	1.08174	27	11.1162	1.05906	27	5.70233
Q9Y2B0	Protein canopy homolog 2	CNPY2	Protein canopy homolog 2 OS=Homo sapiens OX=9606 GN=CNPY2 PE=1 SV=1 - [CNPY2_HUMAN]	48.35	8	8	22	182	20.6392	4.91943	1.01412	22	5.03092	0.941193	22	7.51703	0.936203	22	4.26993	1.15693	22	9.03306	1.04931	22	6.47297	0.949732	22	3.82067
P18754	Regulator of chromosome condensation	RCC1	Regulator of chromosome condensation OS=Homo sapiens OX=9606 GN=RCC1 PE=1 SV=1 - [RCC1_HUMAN]	25.42	8	8	18	421	44.9406	7.51807	1.08059	18	11.5082	0.998729	18	5.31996	1.03283	18	5.07619	0.985857	18	4.84435	0.981489	18	5.59228	0.947464	18	6.0858
P51570	Galactokinase	GALK1	Galactokinase OS=Homo sapiens OX=9606 GN=GALK1 PE=1 SV=1 - [GALK1_HUMAN]	34.44	11	11	22	392	42.2456	6.45557	1.09178	22	7.73158	1.03983	22	5.51144	1.06302	22	6.57336	0.897538	22	6.08658	0.979006	22	8.07605	0.975514	22	3.52317
P50402	Emerin	EMD	Emerin OS=Homo sapiens OX=9606 GN=EMD PE=1 SV=1 - [EMD_HUMAN]	58.66	11	11	28	254	28.9759	5.50342	0.982418	27	6.83259	0.920514	27	6.1943	0.941378	27	4.70202	1.10832	27	5.76041	1.05629	27	6.97203	1.00124	27	6.58639
Q07960	Rho GTPase-activating protein 1	ARHGAP1	Rho GTPase-activating protein 1 OS=Homo sapiens OX=9606 GN=ARHGAP1 PE=1 SV=1 - [RHG01_HUMAN]	25.97	10	10	18	439	50.4042	6.29053	1.05074	18	5.75299	1.06495	18	5.29767	1.06743	18	7.80413	0.924873	18	9.32846	0.972525	18	6.22286	1.02048	18	4.19844
Q14498	RNA-binding protein 39	RBM39	RNA-binding protein 39 OS=Homo sapiens OX=9606 GN=RBM39 PE=1 SV=2 - [RBM39_HUMAN]	27.36	13	13	19	530	59.3427	10.0962	0.971917	19	7.82989	0.999884	19	4.23781	0.993363	19	7.74565	1.02307	19	12.0763	1.01911	19	5.83646	0.993119	19	11.5523
Q10567	AP-1 complex subunit beta-1	AP1B1	AP-1 complex subunit beta-1 OS=Homo sapiens OX=9606 GN=AP1B1 PE=1 SV=2 - [AP1B1_HUMAN]	22.34	9	21	40	949	104.57	5.05908	0.989889	14	10.0735	0.992647	14	4.90281	1.00856	14	4.15912	0.974175	14	9.11103	1.00425	14	7.29409	0.986264	14	7.3342
Q9NZL9	Methionine adenosyltransferase 2 subunit beta	MAT2B	Methionine adenosyltransferase 2 subunit beta OS=Homo sapiens OX=9606 GN=MAT2B PE=1 SV=1 - [MAT2B_HUMAN]	32.04	9	9	16	334	37.5282	7.35693	1.05663	16	6.7019	1.01644	16	4.34764	1.04066	16	4.43935	0.963112	16	5.41547	0.98981	16	8.15196	0.986681	16	5.51645
O76031	ATP-dependent Clp protease ATP-binding subunit clpX-like, mitochondrial	CLPX	ATP-dependent Clp protease ATP-binding subunit clpX-like, mitochondrial OS=Homo sapiens OX=9606 GN=CLPX PE=1 SV=2 - [CLPX_HUMAN]	19.43	11	11	11	633	69.1807	7.57666	1.00428	11	4.03636	0.989785	11	3.61356	0.975129	11	3.83476	1.08058	11	2.93349	1.00912	11	7.84951	0.984638	11	5.47897
P63208	S-phase kinase-associated protein 1	SKP1	S-phase kinase-associated protein 1 OS=Homo sapiens OX=9606 GN=SKP1 PE=1 SV=2 - [SKP1_HUMAN]	55.21	11	11	23	163	18.6462	4.53857	1.02329	23	7.73837	1.07789	23	4.18636	1.06224	23	4.50595	0.922658	23	4.69876	0.938039	23	7.61765	1.00306	23	6.20173
O75347	Tubulin-specific chaperone A	TBCA	Tubulin-specific chaperone A OS=Homo sapiens OX=9606 GN=TBCA PE=1 SV=3 - [TBCA_HUMAN]	58.33	9	9	29	108	12.8467	5.2876	1.13917	29	3.95009	1.0765	29	6.34917	1.16027	29	8.30544	0.781845	29	13.6909	0.935005	29	5.85691	0.97435	29	5.69574
Q9Y2Q3	Glutathione S-transferase kappa 1	GSTK1	Glutathione S-transferase kappa 1 OS=Homo sapiens OX=9606 GN=GSTK1 PE=1 SV=3 - [GSTK1_HUMAN]	37.61	7	7	15	226	25.4803	8.41162	0.958293	15	9.45051	0.939817	15	7.65281	0.89691	15	6.12806	1.24915	15	8.17465	0.935097	15	12.1717	1.01885	15	4.2823
P09543	2',3'-cyclic-nucleotide 3'-phosphodiesterase	CNP	2',3'-cyclic-nucleotide 3'-phosphodiesterase OS=Homo sapiens OX=9606 GN=CNP PE=1 SV=2 - [CN37_HUMAN]	32.78	14	15	23	421	47.5487	9.0708	1.0296	22	10.8192	0.998251	22	5.50826	1.00517	22	5.38605	1.04119	22	7.52194	0.959438	22	6.81468	1.00309	22	9.17404
O00148	ATP-dependent RNA helicase DDX39A	DDX39A	ATP-dependent RNA helicase DDX39A OS=Homo sapiens OX=9606 GN=DDX39A PE=1 SV=2 - [DX39A_HUMAN]	34.19	5	16	38	427	49.098	5.68115	1.08524	11	13.4988	1.01802	11	5.81003	1.0369	11	6.90095	0.909976	11	5.15368	0.987315	11	8.55391	0.97137	11	11.2131
Q9UIA9	Exportin-7	XPO7	Exportin-7 OS=Homo sapiens OX=9606 GN=XPO7 PE=1 SV=3 - [XPO7_HUMAN]	17.76	17	17	23	1087	123.828	6.31592	0.957798	23	7.48754	1.00473	23	6.46294	1.03696	23	8.65992	0.95783	23	6.24396	1.00332	23	6.19525	1.00438	23	6.65788
P62857	40S ribosomal protein S28	RPS28	40S ribosomal protein S28 OS=Homo sapiens OX=9606 GN=RPS28 PE=1 SV=1 - [RS28_HUMAN]	46.38	3	3	18	69	7.8362	10.6968	0.998798	18	10.2223	1.10352	18	5.13076	1.06383	18	4.01272	0.931628	18	5.15763	0.97912	18	5.74569	0.97832	18	6.65142
Q8N163	Cell cycle and apoptosis regulator protein 2	CCAR2	Cell cycle and apoptosis regulator protein 2 OS=Homo sapiens OX=9606 GN=CCAR2 PE=1 SV=2 - [CCAR2_HUMAN]	30.34	25	25	38	923	102.838	5.22412	0.991758	38	7.40602	1.01711	38	3.19165	1.0311	38	6.23606	1.02704	38	6.14957	0.993754	38	7.93794	0.986	38	5.28699
Q9BS26	Endoplasmic reticulum resident protein 44	ERP44	Endoplasmic reticulum resident protein 44 OS=Homo sapiens OX=9606 GN=ERP44 PE=1 SV=1 - [ERP44_HUMAN]	42.61	12	14	27	406	46.9414	5.26221	1.00157	23	6.91244	0.94614	23	8.56323	0.940771	23	5.59417	1.16953	23	9.45529	0.979365	23	7.88335	0.973243	23	6.45446
O43396	Thioredoxin-like protein 1	TXNL1	Thioredoxin-like protein 1 OS=Homo sapiens OX=9606 GN=TXNL1 PE=1 SV=3 - [TXNL1_HUMAN]	35.99	7	7	17	289	32.2307	4.95752	1.03287	17	5.473	1.06338	17	5.57086	1.03141	17	4.87294	0.927414	17	6.74276	1.00217	17	5.17151	0.987286	17	6.95428
P37108	Signal recognition particle 14 kDa protein	SRP14	Signal recognition particle 14 kDa protein OS=Homo sapiens OX=9606 GN=SRP14 PE=1 SV=2 - [SRP14_HUMAN]	43.38	8	8	23	136	14.5608	10.0376	1.11572	23	9.60661	1.0709	23	4.38086	1.07101	23	4.12654	0.950853	23	7.94909	0.910496	23	7.21795	0.918686	23	4.15143
Q12965	Unconventional myosin-Ie	MYO1E	Unconventional myosin-Ie OS=Homo sapiens OX=9606 GN=MYO1E PE=1 SV=2 - [MYO1E_HUMAN]	20.58	20	20	24	1108	126.982	8.92432	1.04597	24	4.61453	1.03772	24	4.02689	1.04308	24	3.59985	0.94321	24	6.50668	0.965584	24	6.97482	0.992602	24	3.99252
O94979	Protein transport protein Sec31A	SEC31A	Protein transport protein Sec31A OS=Homo sapiens OX=9606 GN=SEC31A PE=1 SV=3 - [SC31A_HUMAN]	18.28	21	23	39	1220	132.931	6.88818	0.975594	33	10.8249	0.953911	33	5.5008	0.971812	33	5.9329	0.999758	33	8.01071	1.06149	33	4.82897	1.03775	33	8.93166
Q9UBS4	DnaJ homolog subfamily B member 11	DNAJB11	DnaJ homolog subfamily B member 11 OS=Homo sapiens OX=9606 GN=DNAJB11 PE=1 SV=1 - [DJB11_HUMAN]	30.17	10	10	17	358	40.4886	6.17627	1.02612	17	5.42068	0.929008	17	5.6295	0.923369	17	3.86392	1.18262	17	6.46775	0.946225	17	7.55103	0.978111	17	7.80608
P08243	Asparagine synthetase [glutamine-hydrolyzing]	ASNS	Asparagine synthetase [glutamine-hydrolyzing] OS=Homo sapiens OX=9606 GN=ASNS PE=1 SV=4 - [ASNS_HUMAN]	26.2	14	14	21	561	64.3286	6.85889	0.911779	21	7.91824	0.938937	21	4.14698	0.965795	21	3.74108	0.972106	21	3.29439	1.04875	21	5.32296	1.11584	21	6.57227
P62314	Small nuclear ribonucleoprotein Sm D1	SNRPD1	Small nuclear ribonucleoprotein Sm D1 OS=Homo sapiens OX=9606 GN=SNRPD1 PE=1 SV=1 - [SMD1_HUMAN]	36.97	4	4	13	119	13.2734	11.561	1.01171	13	5.43394	1.00991	13	8.13272	0.959294	13	9.65195	1.01911	13	3.0686	1.01128	13	4.5741	0.973708	13	8.89135
Q9UKY7	Protein CDV3 homolog	CDV3	Protein CDV3 homolog OS=Homo sapiens OX=9606 GN=CDV3 PE=1 SV=1 - [CDV3_HUMAN]	53.49	9	9	14	258	27.3184	6.40479	0.945049	14	11.5265	0.961764	14	4.78242	1.00528	14	5.68384	0.936084	14	9.9273	1.09405	14	7.52838	1.08122	14	12.1625
P20338	Ras-related protein Rab-4A	RAB4A	Ras-related protein Rab-4A OS=Homo sapiens OX=9606 GN=RAB4A PE=1 SV=3 - [RAB4A_HUMAN]	22.94	3	5	18	218	24.3742	6.07471	1.00029	4	6.80222	1.02625	4	2.29295	1.03321	4	0.580514	1.04627	4	4.26097	0.915346	4	4.78522	1.03614	4	6.62838
P62266	40S ribosomal protein S23	RPS23	40S ribosomal protein S23 OS=Homo sapiens OX=9606 GN=RPS23 PE=1 SV=3 - [RS23_HUMAN]	57.34	9	9	33	143	15.7977	10.4917	0.953304	28	11.0815	1.0125	28	7.68536	1.01396	28	5.87009	0.958276	28	4.6117	0.99518	28	10.6676	1.02028	28	9.06176
Q09028	Histone-binding protein RBBP4	RBBP4	Histone-binding protein RBBP4 OS=Homo sapiens OX=9606 GN=RBBP4 PE=1 SV=3 - [RBBP4_HUMAN]	28.47	6	12	26	425	47.6261	4.89404	1.10758	13	13.3371	1.14302	13	4.71596	1.12197	13	9.56536	0.864504	13	5.50731	0.945068	13	12.7927	0.859454	13	4.93192
P19440	Glutathione hydrolase 1 proenzyme	GGT1	Glutathione hydrolase 1 proenzyme OS=Homo sapiens OX=9606 GN=GGT1 PE=1 SV=2 - [GGT1_HUMAN]	21.79	13	13	27	569	61.3718	7.12256	1.07943	27	3.84262	0.969892	27	5.84979	0.980749	27	4.7073	1.09469	27	9.23493	0.961635	27	4.05785	0.956417	27	6.5703
Q7Z794	Keratin, type II cytoskeletal 1b	KRT77	Keratin, type II cytoskeletal 1b OS=Homo sapiens OX=9606 GN=KRT77 PE=2 SV=3 - [K2C1B_HUMAN]	6.23	1	5	34	578	61.8635	5.98584	1.04339	1		0.91024	1		0.995367	1		1.19314	1		1.00463	1		0.909859	1
P17174	Aspartate aminotransferase, cytoplasmic	GOT1	Aspartate aminotransferase, cytoplasmic OS=Homo sapiens OX=9606 GN=GOT1 PE=1 SV=3 - [AATC_HUMAN]	25.91	9	9	16	413	46.2185	7.00537	0.971198	16	5.60957	0.979732	16	3.86763	1.01016	16	3.59597	0.952876	16	4.96994	1.00326	16	3.43439	1.0891	16	5.8808
O00541	Pescadillo homolog	PES1	Pescadillo homolog OS=Homo sapiens OX=9606 GN=PES1 PE=1 SV=1 - [PESC_HUMAN]	27.55	15	15	32	588	67.96	7.32764	1.00173	31	9.14757	1.01234	31	6.96683	1.02295	31	2.96798	1.02303	31	7.00756	1.00044	31	5.18421	0.970709	31	5.53631
O95232	Luc7-like protein 3	LUC7L3	Luc7-like protein 3 OS=Homo sapiens OX=9606 GN=LUC7L3 PE=1 SV=2 - [LC7L3_HUMAN]	22.92	10	11	18	432	51.4351	9.78857	1.07052	14	4.89066	1.02304	14	4.78419	1.06558	14	7.2809	0.949814	14	5.32406	0.99678	14	9.55404	0.982614	14	4.85038
Q6PKG0	La-related protein 1	LARP1	La-related protein 1 OS=Homo sapiens OX=9606 GN=LARP1 PE=1 SV=2 - [LARP1_HUMAN]	26.55	24	24	42	1096	123.434	8.82178	0.987645	41	6.88239	0.997692	41	5.3967	1.01556	41	6.80549	0.994808	41	7.19816	1.00072	41	7.11423	1.01845	41	6.76672
Q96KR1	Zinc finger RNA-binding protein	ZFR	Zinc finger RNA-binding protein OS=Homo sapiens OX=9606 GN=ZFR PE=1 SV=2 - [ZFR_HUMAN]	21.14	17	17	21	1074	116.939	9.0415	0.970851	20	5.72353	0.987275	20	7.19099	0.99059	20	4.0123	1.02185	20	12.3618	1.0301	20	7.15236	0.98649	20	8.42614
P50552	Vasodilator-stimulated phosphoprotein	VASP	Vasodilator-stimulated phosphoprotein OS=Homo sapiens OX=9606 GN=VASP PE=1 SV=3 - [VASP_HUMAN]	30.79	11	11	19	380	39.8051	8.93896	0.934619	19	10.2286	1.00392	19	3.27232	1.02528	19	8.70892	0.945182	19	6.67037	1.04846	19	8.23126	1.07444	19	4.77321
Q14160	Protein scribble homolog	SCRIB	Protein scribble homolog OS=Homo sapiens OX=9606 GN=SCRIB PE=1 SV=4 - [SCRIB_HUMAN]	13.93	18	18	20	1630	174.778	5.07178	0.932668	20	6.96214	0.968142	20	5.04589	0.958967	20	5.99495	1.03999	20	9.61675	1.04477	20	3.3559	1.03992	20	5.75454
Q9H3U1	Protein unc-45 homolog A	UNC45A	Protein unc-45 homolog A OS=Homo sapiens OX=9606 GN=UNC45A PE=1 SV=1 - [UN45A_HUMAN]	17.06	15	15	22	944	103.011	6.07471	1.05308	22	9.68443	1.09034	22	5.35671	1.05573	22	5.97228	0.89283	22	7.8734	0.967543	22	8.29279	0.986761	22	7.28795
P84095	Rho-related GTP-binding protein RhoG	RHOG	Rho-related GTP-binding protein RhoG OS=Homo sapiens OX=9606 GN=RHOG PE=1 SV=1 - [RHOG_HUMAN]	45.03	7	8	15	191	21.2949	8.11865	1.01521	11	9.99786	0.949371	11	4.93414	0.963973	11	4.33846	1.11266	11	6.84369	1.01834	11	6.07861	0.988007	11	2.52373
O94919	Endonuclease domain-containing 1 protein	ENDOD1	Endonuclease domain-containing 1 protein OS=Homo sapiens OX=9606 GN=ENDOD1 PE=1 SV=2 - [ENDD1_HUMAN]	16	6	6	10	500	54.9813	5.70654	1.00134	10	7.36338	0.980746	10	9.03463	0.903192	10	9.15066	1.15019	10	18.3064	1.00609	10	6.13774	0.984997	10	13.1843
Q9HAV0	Guanine nucleotide-binding protein subunit beta-4	GNB4	Guanine nucleotide-binding protein subunit beta-4 OS=Homo sapiens OX=9606 GN=GNB4 PE=1 SV=3 - [GBB4_HUMAN]	20.59	1	7	20	340	37.543	5.99854	0.962917	1		0.943448	1		0.942231	1		1.15797	1		0.992887	1		1.0183	1
Q9NZW5	MAGUK p55 subfamily member 6	MPP6	MAGUK p55 subfamily member 6 OS=Homo sapiens OX=9606 GN=MPP6 PE=1 SV=2 - [MPP6_HUMAN]	40.93	20	21	32	540	61.0788	6.17627	1.02029	30	7.83625	0.981799	30	5.80323	1.01248	30	4.22291	1.07348	30	8.93508	0.963616	30	7.22444	0.98097	30	6.95647
Q9UIG0	Tyrosine-protein kinase BAZ1B	BAZ1B	Tyrosine-protein kinase BAZ1B OS=Homo sapiens OX=9606 GN=BAZ1B PE=1 SV=2 - [BAZ1B_HUMAN]	18	24	25	30	1483	170.796	8.48486	1.07025	27	7.36898	1.1112	27	6.7864	1.12501	27	5.44692	0.909134	27	6.51954	0.919133	27	5.35397	0.918811	27	7.65906
Q14192	Four and a half LIM domains protein 2	FHL2	Four and a half LIM domains protein 2 OS=Homo sapiens OX=9606 GN=FHL2 PE=1 SV=3 - [FHL2_HUMAN]	41.22	12	12	24	279	32.1706	7.54736	0.969148	24	8.0597	0.984341	24	7.21594	0.988661	24	5.15064	1.00417	24	8.23637	1.03212	24	6.19684	1.03875	24	8.06004
Q8IVT2	Mitotic interactor and substrate of PLK1	MISP	Mitotic interactor and substrate of PLK1 OS=Homo sapiens OX=9606 GN=MISP PE=1 SV=1 - [MISP_HUMAN]	33.14	18	18	24	679	75.311	6.82959	0.967421	24	12.5488	1.00914	24	4.89177	1.04597	24	6.75594	1.03124	24	8.51005	0.960889	24	11.1269	0.989413	24	9.68187
P21399	Cytoplasmic aconitate hydratase	ACO1	Cytoplasmic aconitate hydratase OS=Homo sapiens OX=9606 GN=ACO1 PE=1 SV=3 - [ACOC_HUMAN]	19.8	16	16	23	889	98.3366	6.68311	1.05536	23	11.8867	0.974889	23	5.95851	1.03927	23	5.72097	0.958139	23	9.3645	0.984072	23	6.75797	1.01384	23	6.73644
Q9Y608	Leucine-rich repeat flightless-interacting protein 2	LRRFIP2	Leucine-rich repeat flightless-interacting protein 2 OS=Homo sapiens OX=9606 GN=LRRFIP2 PE=1 SV=1 - [LRRF2_HUMAN]	10.68	5	7	14	721	82.1213	6.94678	1.01654	8	4.58662	1.07892	8	7.80307	1.05083	8	2.9378	0.923796	8	6.75393	0.974175	8	5.98566	0.926977	8	7.66122
P63027	Vesicle-associated membrane protein 2	VAMP2	Vesicle-associated membrane protein 2 OS=Homo sapiens OX=9606 GN=VAMP2 PE=1 SV=3 - [VAMP2_HUMAN]	34.48	1	3	6	116	12.6547	8.1333	1.02664	1		0.92358	1		0.855822	1		1.23777	1		1.02152	1		0.95321	1
Q8TEQ6	Gem-associated protein 5	GEMIN5	Gem-associated protein 5 OS=Homo sapiens OX=9606 GN=GEMIN5 PE=1 SV=3 - [GEMI5_HUMAN]	13.46	19	19	27	1508	168.483	6.62451	0.957186	27	7.51873	0.95806	27	4.89973	0.974773	27	5.71273	0.98908	27	7.8899	1.02688	27	5.35174	1.04095	27	6.72113
O60884	DnaJ homolog subfamily A member 2	DNAJA2	DnaJ homolog subfamily A member 2 OS=Homo sapiens OX=9606 GN=DNAJA2 PE=1 SV=1 - [DNJA2_HUMAN]	30.34	12	12	27	412	45.7166	6.48096	1.03166	27	5.90043	1.01438	27	7.47368	1.0717	27	2.89479	0.94728	27	7.57501	0.996278	27	6.09218	0.975982	27	5.19072
P35237	Serpin B6	SERPINB6	Serpin B6 OS=Homo sapiens OX=9606 GN=SERPINB6 PE=1 SV=3 - [SPB6_HUMAN]	37.77	12	12	22	376	42.5941	5.2749	0.968478	22	8.47453	0.999122	22	10.3755	1.03835	22	5.06937	0.953515	22	7.96022	0.988351	22	9.381	1.01389	22	6.5605
O75832	26S proteasome non-ATPase regulatory subunit 10	PSMD10	26S proteasome non-ATPase regulatory subunit 10 OS=Homo sapiens OX=9606 GN=PSMD10 PE=1 SV=1 - [PSD10_HUMAN]	29.2	6	6	10	226	24.4124	6.1001	0.987378	10	8.18643	1.08243	10	3.54675	1.03483	10	4.66288	0.863005	10	13.704	0.980224	10	6.19394	1.05588	10	2.99771
O00264	Membrane-associated progesterone receptor component 1	PGRMC1	Membrane-associated progesterone receptor component 1 OS=Homo sapiens OX=9606 GN=PGRMC1 PE=1 SV=3 - [PGRC1_HUMAN]	47.69	7	9	18	195	21.6578	4.70361	0.927664	12	5.93341	0.90643	12	3.93086	0.861711	12	5.21473	1.29367	12	10.001	1.02932	12	4.899	0.97269	12	3.63551
P47914	60S ribosomal protein L29	RPL29	60S ribosomal protein L29 OS=Homo sapiens OX=9606 GN=RPL29 PE=1 SV=2 - [RL29_HUMAN]	27.04	5	5	15	159	17.7411	11.6636	0.971475	15	6.47926	1.05596	15	6.42215	1.0633	15	1.86999	0.935647	15	5.69308	1.02941	15	7.10776	1.00321	15	6.0042
P09429	High mobility group protein B1	HMGB1	High mobility group protein B1 OS=Homo sapiens OX=9606 GN=HMGB1 PE=1 SV=3 - [HMGB1_HUMAN]	55.35	11	15	68	215	24.8782	5.74463	1.02588	53	11.6336	1.03486	53	6.49648	1.05433	53	8.71606	0.916771	53	9.27744	1.01794	53	13.4764	0.964061	53	6.09556
P26232	Catenin alpha-2	CTNNA2	Catenin alpha-2 OS=Homo sapiens OX=9606 GN=CTNNA2 PE=1 SV=5 - [CTNA2_HUMAN]	11.65	1	11	20	953	105.247	5.70654	1.12008	1		0.99393	1		0.988648	1		1.27313	1		0.803714	1		0.888146	1
P53992	Protein transport protein Sec24C	SEC24C	Protein transport protein Sec24C OS=Homo sapiens OX=9606 GN=SEC24C PE=1 SV=3 - [SC24C_HUMAN]	21.85	21	21	28	1094	118.249	7.06396	0.950368	28	7.52637	1.00045	28	6.57506	1.01811	28	8.33151	0.995181	28	6.49652	1.01214	28	4.93804	1.03525	28	6.78823
Q5JTV8	Torsin-1A-interacting protein 1	TOR1AIP1	Torsin-1A-interacting protein 1 OS=Homo sapiens OX=9606 GN=TOR1AIP1 PE=1 SV=2 - [TOIP1_HUMAN]	26.93	12	13	25	583	66.2083	8.17725	0.990872	21	6.48631	0.990118	21	8.39383	0.995244	21	4.77743	1.0735	21	8.20195	0.970212	21	7.04152	0.984572	21	5.51035
P10606	Cytochrome c oxidase subunit 5B, mitochondrial	COX5B	Cytochrome c oxidase subunit 5B, mitochondrial OS=Homo sapiens OX=9606 GN=COX5B PE=1 SV=2 - [COX5B_HUMAN]	50.39	7	7	21	129	13.6869	8.80713	0.964834	21	8.94498	0.918551	21	6.1293	0.902232	21	7.57723	1.13844	21	6.89022	1.07641	21	5.36223	1.02627	21	5.77339
Q92888	Rho guanine nucleotide exchange factor 1	ARHGEF1	Rho guanine nucleotide exchange factor 1 OS=Homo sapiens OX=9606 GN=ARHGEF1 PE=1 SV=2 - [ARHG1_HUMAN]	24.45	19	19	26	912	102.371	5.65576	0.994374	26	3.51864	1.05953	26	5.66304	1.04696	26	7.609	0.92901	26	6.99564	0.975717	26	9.37605	0.994674	26	3.90177
Q2TAY7	WD40 repeat-containing protein SMU1	SMU1	WD40 repeat-containing protein SMU1 OS=Homo sapiens OX=9606 GN=SMU1 PE=1 SV=2 - [SMU1_HUMAN]	36.45	16	16	29	513	57.5072	7.18115	0.964411	29	10.4758	0.975884	29	5.73378	0.977454	29	6.72684	1.00981	29	8.54803	1.01793	29	8.20914	1.03611	29	9.58011
Q13085	Acetyl-CoA carboxylase 1	ACACA	Acetyl-CoA carboxylase 1 OS=Homo sapiens OX=9606 GN=ACACA PE=1 SV=2 - [ACACA_HUMAN]	11.51	24	24	34	2346	265.385	6.3667	0.861978	34	9.13346	0.894099	34	7.56439	0.915969	34	6.04992	1.0599	34	7.02561	1.09305	34	6.52611	1.11308	34	7.67186
O75947	ATP synthase subunit d, mitochondrial	ATP5PD	ATP synthase subunit d, mitochondrial OS=Homo sapiens OX=9606 GN=ATP5PD PE=1 SV=3 - [ATP5H_HUMAN]	57.14	10	10	35	161	18.4795	5.30029	1.00804	35	6.97356	0.910393	35	5.32992	0.911388	35	5.88291	1.20561	35	7.75685	1.0208	35	4.38204	0.958805	35	4.45966
P40616	ADP-ribosylation factor-like protein 1	ARL1	ADP-ribosylation factor-like protein 1 OS=Homo sapiens OX=9606 GN=ARL1 PE=1 SV=1 - [ARL1_HUMAN]	33.7	5	5	9	181	20.4044	5.71924	0.870937	9	18.232	0.978716	9	4.81237	0.953825	9	9.3653	0.98487	9	2.95987	1.09936	9	5.986	1.07141	9	6.77257
P51452	Dual specificity protein phosphatase 3	DUSP3	Dual specificity protein phosphatase 3 OS=Homo sapiens OX=9606 GN=DUSP3 PE=1 SV=1 - [DUS3_HUMAN]	34.59	5	5	9	185	20.4653	7.79639	0.996341	9	6.40938	1.01737	9	6.73977	1.02779	9	5.82255	0.914366	9	4.41771	0.988178	9	4.98236	1.06055	9	7.44316
Q96P70	Importin-9	IPO9	Importin-9 OS=Homo sapiens OX=9606 GN=IPO9 PE=1 SV=3 - [IPO9_HUMAN]	13.74	13	13	17	1041	115.889	4.80518	0.996041	17	8.05138	1.03861	17	7.64285	1.10509	17	4.84625	0.874992	17	16.5474	0.983685	17	6.67129	1.01004	17	8.5506
P30508	HLA class I histocompatibility antigen, Cw-12 alpha chain	HLA-C	HLA class I histocompatibility antigen, Cw-12 alpha chain OS=Homo sapiens OX=9606 GN=HLA-C PE=1 SV=2 - [1C12_HUMAN]	35.79	4	9	15	366	40.8601	6.30322	1.04023	7	8.34961	0.981118	7	5.15458	0.964721	7	4.99515	1.12509	7	4.47313	1.00156	7	5.31503	0.957734	7	6.75454
P49591	Serine--tRNA ligase, cytoplasmic	SARS	Serine--tRNA ligase, cytoplasmic OS=Homo sapiens OX=9606 GN=SARS PE=1 SV=3 - [SYSC_HUMAN]	30.54	16	16	24	514	58.7401	6.43018	0.914416	24	7.93773	0.93431	24	8.47092	0.95728	24	5.17832	1.01875	24	3.50902	1.0743	24	4.73152	1.1047	24	7.58923
Q14573	Inositol 1,4,5-trisphosphate receptor type 3	ITPR3	Inositol 1,4,5-trisphosphate receptor type 3 OS=Homo sapiens OX=9606 GN=ITPR3 PE=1 SV=2 - [ITPR3_HUMAN]	12.32	28	30	43	2671	303.912	6.48096	0.986697	35	5.20764	0.926473	35	4.76896	0.933535	35	4.72615	1.11542	35	6.93558	1.01445	35	8.15787	1.00721	35	4.30989
O43813	Glutathione S-transferase LANCL1	LANCL1	Glutathione S-transferase LANCL1 OS=Homo sapiens OX=9606 GN=LANCL1 PE=1 SV=1 - [LANC1_HUMAN]	25.56	9	9	21	399	45.2536	7.75244	1.0951	21	14.5282	1.06042	21	5.43037	1.0805	21	10.0066	0.899699	21	7.98966	0.935918	21	4.96917	0.950142	21	7.00005
O60264	SWI/SNF-related matrix-associated actin-dependent regulator of chromatin subfamily A member 5	SMARCA5	SWI/SNF-related matrix-associated actin-dependent regulator of chromatin subfamily A member 5 OS=Homo sapiens OX=9606 GN=SMARCA5 PE=1 SV=1 - [SMCA5_HUMAN]	22.15	18	26	34	1052	121.828	8.08936	0.991171	23	8.87527	1.01342	23	6.48392	1.06931	23	6.80898	0.986834	23	5.32339	0.990129	23	8.57742	0.952261	23	8.18958
Q7L576	Cytoplasmic FMR1-interacting protein 1	CYFIP1	Cytoplasmic FMR1-interacting protein 1 OS=Homo sapiens OX=9606 GN=CYFIP1 PE=1 SV=1 - [CYFP1_HUMAN]	17.56	9	21	28	1253	145.089	6.90283	0.979543	12	15.3968	0.975216	12	8.74058	1.01533	12	4.94307	0.950669	12	6.47478	1.03218	12	7.73682	1.00852	12	15.5752
Q16576	Histone-binding protein RBBP7	RBBP7	Histone-binding protein RBBP7 OS=Homo sapiens OX=9606 GN=RBBP7 PE=1 SV=1 - [RBBP7_HUMAN]	34.35	7	12	23	425	47.7902	5.04639	1.17103	12	11.7611	1.10765	12	5.90755	1.11954	12	3.11725	0.886712	12	8.39321	0.939725	12	9.40409	0.880206	12	5.34098
O43615	Mitochondrial import inner membrane translocase subunit TIM44	TIMM44	Mitochondrial import inner membrane translocase subunit TIM44 OS=Homo sapiens OX=9606 GN=TIMM44 PE=1 SV=2 - [TIM44_HUMAN]	22.57	10	10	17	452	51.3235	8.32373	0.98186	16	5.45667	0.969931	16	3.42003	0.969266	16	4.81724	1.02848	17	4.6375	1.04552	16	6.21344	1.0347	17	7.26281
Q8N1G4	Leucine-rich repeat-containing protein 47	LRRC47	Leucine-rich repeat-containing protein 47 OS=Homo sapiens OX=9606 GN=LRRC47 PE=1 SV=1 - [LRC47_HUMAN]	21.27	11	11	17	583	63.4337	8.27979	0.980975	16	6.96223	0.975246	16	4.02485	0.987962	16	6.01781	0.964719	16	11.5379	1.05786	16	4.26841	1.05238	16	9.16409
O95470	Sphingosine-1-phosphate lyase 1	SGPL1	Sphingosine-1-phosphate lyase 1 OS=Homo sapiens OX=9606 GN=SGPL1 PE=1 SV=3 - [SGPL1_HUMAN]	26.76	14	14	21	568	63.4827	9.15869	0.98073	21	10.522	0.977257	21	5.00752	0.971062	21	4.74633	1.05656	21	9.61187	1.01482	21	5.22597	0.972416	21	6.31634
O75915	PRA1 family protein 3	ARL6IP5	PRA1 family protein 3 OS=Homo sapiens OX=9606 GN=ARL6IP5 PE=1 SV=1 - [PRAF3_HUMAN]	23.4	4	4	12	188	21.6004	9.77393	0.959446	12	1.62752	0.929333	12	11.5553	0.901638	12	4.50016	1.20467	12	11.5522	1.02585	12	3.82668	1.00086	12	3.91667
P18859	ATP synthase-coupling factor 6, mitochondrial	ATP5PF	ATP synthase-coupling factor 6, mitochondrial OS=Homo sapiens OX=9606 GN=ATP5PF PE=1 SV=1 - [ATP5J_HUMAN]	37.96	5	5	17	108	12.5796	9.5249	0.987485	17	7.41555	0.872087	17	7.03348	0.860013	17	6.90061	1.32718	17	7.6716	1.01651	17	7.22099	0.959294	17	4.24173
O75436	Vacuolar protein sorting-associated protein 26A	VPS26A	Vacuolar protein sorting-associated protein 26A OS=Homo sapiens OX=9606 GN=VPS26A PE=1 SV=2 - [VP26A_HUMAN]	38.84	10	11	19	327	38.1457	6.56592	1.02572	18	7.72634	1.00758	18	4.98343	1.03394	18	6.094	0.927452	18	6.87128	0.99849	18	5.78292	1.03676	18	6.74841
P20962	Parathymosin	PTMS	Parathymosin OS=Homo sapiens OX=9606 GN=PTMS PE=1 SV=2 - [PTMS_HUMAN]	22.55	2	2	17	102	11.5232	4.15771	1.08298	17	3.34374	1.07334	17	3.70007	1.14992	17	6.1185	0.889079	17	8.00643	0.952856	17	4.37683	0.884698	17	3.70878
Q9Y263	Phospholipase A-2-activating protein	PLAA	Phospholipase A-2-activating protein OS=Homo sapiens OX=9606 GN=PLAA PE=1 SV=2 - [PLAP_HUMAN]	20.38	15	15	22	795	87.1014	6.3667	0.999512	22	8.37942	0.979803	22	6.39919	0.970648	22	7.50218	1.00347	22	10.0624	0.995762	22	6.27356	1.02989	22	7.57281
P63096	Guanine nucleotide-binding protein G(i) subunit alpha-1	GNAI1	Guanine nucleotide-binding protein G(i) subunit alpha-1 OS=Homo sapiens OX=9606 GN=GNAI1 PE=1 SV=2 - [GNAI1_HUMAN]	36.16	4	12	27	354	40.3352	5.97314	1.0289	9	8.84087	0.939952	9	18.9981	0.89449	9	4.24019	1.10992	9	17.6341	0.974863	9	6.37217	0.983805	9	3.08365
P80303	Nucleobindin-2	NUCB2	Nucleobindin-2 OS=Homo sapiens OX=9606 GN=NUCB2 PE=1 SV=3 - [NUCB2_HUMAN]	32.14	12	13	23	420	50.1914	5.12256	1.08109	22	7.41297	0.994726	22	6.83641	0.974974	22	6.14084	1.13782	22	9.43816	0.945554	22	6.87961	0.899081	22	6.75722
Q5JTH9	RRP12-like protein	RRP12	RRP12-like protein OS=Homo sapiens OX=9606 GN=RRP12 PE=1 SV=2 - [RRP12_HUMAN]	16.27	19	19	26	1297	143.611	8.74854	1.01137	26	9.41883	1.06316	26	4.35382	1.07084	26	5.09771	1.00535	26	5.24176	0.978638	26	5.5131	0.930658	26	6.15923
P53597	Succinate--CoA ligase [ADP/GDP-forming] subunit alpha, mitochondrial	SUCLG1	Succinate--CoA ligase [ADP/GDP-forming] subunit alpha, mitochondrial OS=Homo sapiens OX=9606 GN=SUCLG1 PE=1 SV=4 - [SUCA_HUMAN]	24.28	7	7	14	346	36.2268	8.79248	0.973085	14	5.02763	0.872738	14	9.53668	0.92375	14	9.46605	1.20554	14	8.88923	1.03122	14	5.64016	1.00437	14	6.28789
P61221	ATP-binding cassette sub-family E member 1	ABCE1	ATP-binding cassette sub-family E member 1 OS=Homo sapiens OX=9606 GN=ABCE1 PE=1 SV=1 - [ABCE1_HUMAN]	32.22	19	19	39	599	67.271	8.33838	0.987726	39	6.17647	0.986726	39	4.75649	1.02311	39	6.23066	0.929987	39	8.33391	1.03361	39	5.36006	1.04275	39	5.53995
Q9UNF0	Protein kinase C and casein kinase substrate in neurons protein 2	PACSIN2	Protein kinase C and casein kinase substrate in neurons protein 2 OS=Homo sapiens OX=9606 GN=PACSIN2 PE=1 SV=2 - [PACN2_HUMAN]	31.07	15	15	37	486	55.7039	5.19873	1.02092	37	6.29705	1.03111	37	4.62589	1.07942	37	6.48764	0.905162	37	10.4444	1.02012	37	4.89125	1.0004	37	5.26988
P40121	Macrophage-capping protein	CAPG	Macrophage-capping protein OS=Homo sapiens OX=9606 GN=CAPG PE=1 SV=2 - [CAPG_HUMAN]	19.25	6	6	12	348	38.4745	6.18896	1.04004	12	9.56288	0.95706	12	4.5019	0.99755	12	3.92877	0.962922	12	6.86912	1.01962	12	11.7569	1.00101	12	1.62247
Q14019	Coactosin-like protein	COTL1	Coactosin-like protein OS=Homo sapiens OX=9606 GN=COTL1 PE=1 SV=3 - [COTL1_HUMAN]	55.63	8	8	26	142	15.935	5.66846	0.916197	26	17.7665	0.972118	26	7.00196	0.94797	26	7.26829	0.860544	26	8.69144	1.06172	26	4.77198	1.14244	26	11.5604
O15260	Surfeit locus protein 4	SURF4	Surfeit locus protein 4 OS=Homo sapiens OX=9606 GN=SURF4 PE=1 SV=3 - [SURF4_HUMAN]	13.38	3	3	8	269	30.3738	7.78174	0.951912	8	10.2308	0.987914	8	4.59239	0.955819	8	5.69513	1.10563	8	10.1825	1.00254	8	2.56879	0.960211	8	8.21071
Q9UNM6	26S proteasome non-ATPase regulatory subunit 13	PSMD13	26S proteasome non-ATPase regulatory subunit 13 OS=Homo sapiens OX=9606 GN=PSMD13 PE=1 SV=2 - [PSD13_HUMAN]	37.5	15	15	24	376	42.9181	5.80811	0.986729	24	3.34439	1.01268	24	5.03507	1.04464	24	4.39882	0.941595	24	2.95909	1.02789	24	4.87478	1.01059	24	2.58783
Q7Z434	Mitochondrial antiviral-signaling protein	MAVS	Mitochondrial antiviral-signaling protein OS=Homo sapiens OX=9606 GN=MAVS PE=1 SV=2 - [MAVS_HUMAN]	21.67	7	7	9	540	56.4931	5.51611	0.924621	9	4.49516	0.985972	9	4.53573	0.949591	9	6.27786	1.06072	9	12.3179	1.05222	9	4.5058	1.04978	9	4.02369
P62330	ADP-ribosylation factor 6	ARF6	ADP-ribosylation factor 6 OS=Homo sapiens OX=9606 GN=ARF6 PE=1 SV=2 - [ARF6_HUMAN]	46.86	5	6	16	175	20.0694	8.95361	0.95629	13	10.8486	0.920701	13	7.04769	0.927327	13	7.8783	1.09803	13	5.99753	1.01676	13	5.22174	1.07829	13	8.99121
P05026	Sodium/potassium-transporting ATPase subunit beta-1	ATP1B1	Sodium/potassium-transporting ATPase subunit beta-1 OS=Homo sapiens OX=9606 GN=ATP1B1 PE=1 SV=1 - [AT1B1_HUMAN]	30.69	8	8	21	303	35.0389	8.52881	1.1018	21	8.22189	1.01278	21	1.79361	1.00326	21	6.64649	1.09812	21	7.22065	0.964434	21	5.4631	0.895155	21	7.77579
P51153	Ras-related protein Rab-13	RAB13	Ras-related protein Rab-13 OS=Homo sapiens OX=9606 GN=RAB13 PE=1 SV=1 - [RAB13_HUMAN]	39.9	6	9	23	203	22.7597	9.18799	0.973041	10	5.65936	0.90842	10	4.69367	0.901913	10	3.8714	1.06098	10	7.39723	1.06664	10	4.2358	1.08142	10	2.93123
Q9NRW1	Ras-related protein Rab-6B	RAB6B	Ras-related protein Rab-6B OS=Homo sapiens OX=9606 GN=RAB6B PE=1 SV=1 - [RAB6B_HUMAN]	24.52	1	5	18	208	23.4469	5.52881	0.955069	1		0.874081	1		0.935826	1		1.13859	1		1.03787	1		1.0611	1
P46108	Adapter molecule crk	CRK	Adapter molecule crk OS=Homo sapiens OX=9606 GN=CRK PE=1 SV=2 - [CRK_HUMAN]	37.17	10	10	15	304	33.81	5.5542	1.02591	15	9.20658	1.01786	15	4.37601	1.05259	15	10.4783	0.974459	15	6.74968	0.968111	15	8.30699	0.990546	15	7.70501
P48507	Glutamate--cysteine ligase regulatory subunit	GCLM	Glutamate--cysteine ligase regulatory subunit OS=Homo sapiens OX=9606 GN=GCLM PE=1 SV=1 - [GSH0_HUMAN]	33.21	8	8	12	274	30.7078	6.02393	0.983793	12	7.50819	1.0278	12	3.97664	1.04327	12	6.57235	0.893882	12	4.94026	0.986721	12	8.35468	1.07357	12	5.63549
Q9Y3D6	Mitochondrial fission 1 protein	FIS1	Mitochondrial fission 1 protein OS=Homo sapiens OX=9606 GN=FIS1 PE=1 SV=2 - [FIS1_HUMAN]	38.82	5	5	10	152	16.927	8.79248	1.06534	10	6.26305	0.971845	10	2.67668	0.950245	10	6.73956	1.06772	10	3.69698	1.01239	10	4.87746	0.992936	10	11.3816
Q9UBQ5	Eukaryotic translation initiation factor 3 subunit K	EIF3K	Eukaryotic translation initiation factor 3 subunit K OS=Homo sapiens OX=9606 GN=EIF3K PE=1 SV=1 - [EIF3K_HUMAN]	25.23	5	5	16	218	25.0434	4.93213	0.983401	14	7.18478	1.03811	14	4.57825	1.02831	14	2.90371	0.944545	14	7.21997	1.02741	14	5.46801	1.01447	14	4.10474
Q03135	Caveolin-1	CAV1	Caveolin-1 OS=Homo sapiens OX=9606 GN=CAV1 PE=1 SV=4 - [CAV1_HUMAN]	45.51	8	8	29	178	20.4585	6.02393	0.955629	29	7.26829	0.949183	29	2.99111	0.957316	29	6.26486	1.07439	29	5.35347	1.06564	29	10.0634	1.00242	29	7.05954
O43172	U4/U6 small nuclear ribonucleoprotein Prp4	PRPF4	U4/U6 small nuclear ribonucleoprotein Prp4 OS=Homo sapiens OX=9606 GN=PRPF4 PE=1 SV=2 - [PRP4_HUMAN]	16.86	7	7	12	522	58.4124	7.41553	1.03577	12	3.61692	1.00962	12	6.14717	1.03504	12	6.42773	0.992998	12	2.23659	0.996889	12	9.69018	0.957391	12	1.95579
P50914	60S ribosomal protein L14	RPL14	60S ribosomal protein L14 OS=Homo sapiens OX=9606 GN=RPL14 PE=1 SV=4 - [RL14_HUMAN]	41.86	10	10	25	215	23.417	10.9312	1.02121	25	8.81942	1.01147	25	5.11284	1.02742	25	6.76423	0.981531	25	12.945	0.993363	25	9.06469	0.980994	25	9.54314
P18583	Protein SON	SON	Protein SON OS=Homo sapiens OX=9606 GN=SON PE=1 SV=4 - [SON_HUMAN]	5.15	11	11	22	2426	263.664	5.64307	1.01423	20	4.1429	0.982515	20	7.68737	1.018	20	4.28837	1.01339	20	8.43704	0.961002	20	10.9788	0.988233	20	6.92831
Q9P2R7	Succinate--CoA ligase [ADP-forming] subunit beta, mitochondrial	SUCLA2	Succinate--CoA ligase [ADP-forming] subunit beta, mitochondrial OS=Homo sapiens OX=9606 GN=SUCLA2 PE=1 SV=3 - [SUCB1_HUMAN]	24.19	10	10	27	463	50.2852	7.41553	1.02772	27	8.3601	0.953914	27	4.32646	0.952891	27	3.72719	1.08304	27	8.6904	1.02664	27	7.35622	0.986439	27	8.58788
P51398	28S ribosomal protein S29, mitochondrial	DAP3	28S ribosomal protein S29, mitochondrial OS=Homo sapiens OX=9606 GN=DAP3 PE=1 SV=1 - [RT29_HUMAN]	26.63	9	9	13	398	45.5376	8.88037	0.939703	13	3.85678	0.971252	13	8.73136	0.938515	13	4.0438	1.09666	13	6.56134	0.99941	13	4.8644	1.03521	13	8.37874
P48509	CD151 antigen	CD151	CD151 antigen OS=Homo sapiens OX=9606 GN=CD151 PE=1 SV=3 - [CD151_HUMAN]	22.13	7	7	19	253	28.2763	7.47412	0.990766	19	7.90836	0.942423	19	6.09108	0.928324	19	2.39897	1.12176	19	8.41649	1.0423	19	5.2484	0.986665	19	8.24672
P28482	Mitogen-activated protein kinase 1	MAPK1	Mitogen-activated protein kinase 1 OS=Homo sapiens OX=9606 GN=MAPK1 PE=1 SV=3 - [MK01_HUMAN]	36.67	8	12	20	360	41.3632	6.97607	1.09364	13	6.74317	1.05033	13	3.59267	1.1382	13	4.00741	0.885554	13	6.3435	0.943109	13	4.79788	0.95417	13	5.33232
O15347	High mobility group protein B3	HMGB3	High mobility group protein B3 OS=Homo sapiens OX=9606 GN=HMGB3 PE=1 SV=4 - [HMGB3_HUMAN]	42.5	9	10	26	200	22.9654	8.36768	1.09239	22	7.91747	1.10306	22	7.01579	1.11729	22	9.68643	0.904572	22	11.304	0.897659	22	10.7968	0.90717	22	9.02093
Q9H4A6	Golgi phosphoprotein 3	GOLPH3	Golgi phosphoprotein 3 OS=Homo sapiens OX=9606 GN=GOLPH3 PE=1 SV=1 - [GOLP3_HUMAN]	22.82	6	6	9	298	33.7895	6.44287	0.95823	9	3.91458	0.994794	9	1.74835	0.996995	9	2.35419	1.02427	9	7.95579	1.03903	9	3.86581	1.01235	9	4.93492
O43583	Density-regulated protein	DENR	Density-regulated protein OS=Homo sapiens OX=9606 GN=DENR PE=1 SV=2 - [DENR_HUMAN]	12.12	2	2	11	198	22.0781	5.30029	1.07811	11	2.49302	1.03768	11	4.60101	1.08108	11	2.30696	0.894938	11	4.08147	1.00205	11	4.34232	0.969627	11	3.23836
Q13148	TAR DNA-binding protein 43	TARDBP	TAR DNA-binding protein 43 OS=Homo sapiens OX=9606 GN=TARDBP PE=1 SV=1 - [TADBP_HUMAN]	21.74	9	9	18	414	44.7113	6.18896	1.01955	18	8.48088	0.979538	18	5.25308	1.04863	18	5.69038	0.989798	18	4.15967	0.978834	18	8.14606	0.977559	18	9.88823
P46939	Utrophin	UTRN	Utrophin OS=Homo sapiens OX=9606 GN=UTRN PE=1 SV=2 - [UTRO_HUMAN]	9.35	30	30	37	3433	394.22	5.32568	1.05279	37	6.22574	1.0196	37	7.21393	1.007	37	4.66193	1.02181	37	8.69777	0.956154	37	4.94382	0.972185	37	8.19722
P10155	60 kDa SS-A/Ro ribonucleoprotein	RO60	60 kDa SS-A/Ro ribonucleoprotein OS=Homo sapiens OX=9606 GN=RO60 PE=1 SV=2 - [RO60_HUMAN]	28.62	16	16	28	538	60.6312	8.03076	1.0206	28	7.92096	0.999935	28	6.30718	1.01128	28	3.17269	0.998901	28	5.138	0.979418	28	7.00058	0.990214	28	5.31351
Q96GQ7	Probable ATP-dependent RNA helicase DDX27	DDX27	Probable ATP-dependent RNA helicase DDX27 OS=Homo sapiens OX=9606 GN=DDX27 PE=1 SV=2 - [DDX27_HUMAN]	19.22	16	16	21	796	89.7792	9.27588	1.01096	21	8.18928	1.01333	21	4.19615	1.01882	21	3.51628	1.04637	21	6.25044	0.981902	21	7.57982	0.961007	21	4.89403
Q14694	Ubiquitin carboxyl-terminal hydrolase 10	USP10	Ubiquitin carboxyl-terminal hydrolase 10 OS=Homo sapiens OX=9606 GN=USP10 PE=1 SV=2 - [UBP10_HUMAN]	15.41	11	11	17	798	87.0798	5.31299	0.988038	17	10.4793	1.03145	17	5.41938	1.04837	17	2.19291	0.928413	17	3.3462	0.981678	17	6.64522	0.97625	17	5.39125
Q9Y6Y8	SEC23-interacting protein	SEC23IP	SEC23-interacting protein OS=Homo sapiens OX=9606 GN=SEC23IP PE=1 SV=1 - [S23IP_HUMAN]	22	19	20	39	1000	111.007	5.5415	0.981315	32	5.86653	0.988228	32	4.48171	1.01296	32	5.12034	0.937965	32	6.88679	1.03314	32	7.05025	1.03841	32	5.66052
Q07666	KH domain-containing, RNA-binding, signal transduction-associated protein 1	KHDRBS1	KH domain-containing, RNA-binding, signal transduction-associated protein 1 OS=Homo sapiens OX=9606 GN=KHDRBS1 PE=1 SV=1 - [KHDR1_HUMAN]	16.7	6	8	27	443	48.1972	8.66064	1.04971	24	2.9866	0.997404	24	4.2	1.02699	24	4.40382	1.02492	24	4.58486	0.992192	24	3.08232	0.964031	24	2.40173
Q9UBQ0	Vacuolar protein sorting-associated protein 29	VPS29	Vacuolar protein sorting-associated protein 29 OS=Homo sapiens OX=9606 GN=VPS29 PE=1 SV=1 - [VPS29_HUMAN]	36.81	7	7	18	182	20.4927	6.78564	1.0538	18	6.12793	1.05222	18	4.90853	1.08789	18	7.56203	0.88689	18	9.23574	0.97392	18	4.45151	0.977419	18	5.75175
Q12765	Secernin-1	SCRN1	Secernin-1 OS=Homo sapiens OX=9606 GN=SCRN1 PE=1 SV=2 - [SCRN1_HUMAN]	23.67	9	9	18	414	46.3525	4.75439	1.004	18	4.20951	1.04535	18	8.05563	1.03821	18	3.85534	0.947109	18	7.39576	0.9592	18	6.91235	1.0205	18	5.83911
Q8WXX5	DnaJ homolog subfamily C member 9	DNAJC9	DnaJ homolog subfamily C member 9 OS=Homo sapiens OX=9606 GN=DNAJC9 PE=1 SV=1 - [DNJC9_HUMAN]	38.85	9	9	12	260	29.8911	5.73193	1.05891	12	7.91515	1.11034	12	6.14669	1.10946	12	3.69762	0.846562	12	4.84973	0.92603	12	6.23727	0.963366	12	6.87727
O75691	Small subunit processome component 20 homolog	UTP20	Small subunit processome component 20 homolog OS=Homo sapiens OX=9606 GN=UTP20 PE=1 SV=3 - [UTP20_HUMAN]	6.89	19	19	22	2785	318.182	7.38623	1.03071	22	7.16498	1.04097	22	8.94039	1.07618	22	6.45632	0.986561	22	6.25769	0.965471	22	6.94409	0.950259	22	6.72929
Q01081	Splicing factor U2AF 35 kDa subunit	U2AF1	Splicing factor U2AF 35 kDa subunit OS=Homo sapiens OX=9606 GN=U2AF1 PE=1 SV=3 - [U2AF1_HUMAN]	21.67	6	6	13	240	27.8545	8.80713	0.972386	13	6.34268	1.0042	13	4.73957	0.985637	13	4.00318	1.0463	13	12.0759	0.960573	13	11.8406	1.02762	13	4.78206
O95433	Activator of 90 kDa heat shock protein ATPase homolog 1	AHSA1	Activator of 90 kDa heat shock protein ATPase homolog 1 OS=Homo sapiens OX=9606 GN=AHSA1 PE=1 SV=1 - [AHSA1_HUMAN]	37.87	12	12	30	338	38.2503	5.52881	1.01954	30	8.11844	1.03808	30	4.99161	1.0839	30	5.39539	0.883877	30	9.47509	0.96783	30	4.43002	1.01788	30	3.48354
Q99471	Prefoldin subunit 5	PFDN5	Prefoldin subunit 5 OS=Homo sapiens OX=9606 GN=PFDN5 PE=1 SV=2 - [PFD5_HUMAN]	66.88	8	8	15	154	17.317	6.32861	1.0252	15	9.62753	1.01923	15	4.19267	1.02569	15	5.97183	0.924196	15	6.80229	1.00392	15	5.66197	1.05145	15	9.65744
Q9UBF2	Coatomer subunit gamma-2	COPG2	Coatomer subunit gamma-2 OS=Homo sapiens OX=9606 GN=COPG2 PE=1 SV=1 - [COPG2_HUMAN]	20.32	12	16	22	871	97.5596	5.80811	0.97398	16	4.69368	0.999901	16	5.9396	1.03392	16	4.44693	0.987118	16	4.12033	0.997159	16	6.82198	1.03888	16	3.4626
O43290	U4/U6.U5 tri-snRNP-associated protein 1	SART1	U4/U6.U5 tri-snRNP-associated protein 1 OS=Homo sapiens OX=9606 GN=SART1 PE=1 SV=1 - [SNUT1_HUMAN]	18.38	12	13	20	800	90.2003	6.12549	1.0421	17	8.77377	1.07406	17	7.15757	1.05241	17	9.01153	0.904518	17	13.443	1.00284	17	5.41099	0.971258	17	8.83957
Q6IBS0	Twinfilin-2	TWF2	Twinfilin-2 OS=Homo sapiens OX=9606 GN=TWF2 PE=1 SV=2 - [TWF2_HUMAN]	36.68	10	14	27	349	39.5233	6.84424	0.982906	22	5.55841	1.02512	22	5.26965	1.02019	22	4.25491	0.914305	22	10.0554	0.987814	22	9.16475	1.0185	22	10.2804
Q86XP3	ATP-dependent RNA helicase DDX42	DDX42	ATP-dependent RNA helicase DDX42 OS=Homo sapiens OX=9606 GN=DDX42 PE=1 SV=1 - [DDX42_HUMAN]	22.39	18	18	22	938	102.912	7.02002	0.998749	21	6.61345	0.991632	21	5.43634	1.01179	21	5.40715	1.02531	21	5.63477	1.02818	21	6.83003	1.00102	21	5.61459
Q9UGI8	Testin	TES	Testin OS=Homo sapiens OX=9606 GN=TES PE=1 SV=1 - [TES_HUMAN]	38.24	16	16	33	421	47.9639	7.6792	1.03047	33	7.23626	1.08298	33	4.97903	1.10372	33	8.274	0.845792	33	10.8942	0.931639	33	6.26147	1.02478	33	6.44052
P11766	Alcohol dehydrogenase class-3	ADH5	Alcohol dehydrogenase class-3 OS=Homo sapiens OX=9606 GN=ADH5 PE=1 SV=4 - [ADHX_HUMAN]	33.96	12	12	28	374	39.6984	7.48877	1.04412	28	7.41494	1.0637	28	5.5529	1.10007	28	3.45688	0.832587	28	7.49944	0.983294	28	6.98618	1.00147	28	5.4487
Q9BVK6	Transmembrane emp24 domain-containing protein 9	TMED9	Transmembrane emp24 domain-containing protein 9 OS=Homo sapiens OX=9606 GN=TMED9 PE=1 SV=2 - [TMED9_HUMAN]	37.45	9	11	21	235	27.2602	8.01611	1.02809	16	4.45904	0.920931	16	5.07295	0.931108	16	6.14829	1.21873	16	8.12833	0.937101	16	9.90862	0.973461	16	7.766
O00487	26S proteasome non-ATPase regulatory subunit 14	PSMD14	26S proteasome non-ATPase regulatory subunit 14 OS=Homo sapiens OX=9606 GN=PSMD14 PE=1 SV=1 - [PSDE_HUMAN]	34.84	11	11	21	310	34.5546	6.52197	0.93652	21	10.1445	0.984931	21	6.12638	1.02585	21	4.46273	0.96733	21	7.8765	1.03778	21	8.61229	1.02198	21	3.86011
P0DJD0	RANBP2-like and GRIP domain-containing protein 1	RGPD1	RANBP2-like and GRIP domain-containing protein 1 OS=Homo sapiens OX=9606 GN=RGPD1 PE=2 SV=1 - [RGPD1_HUMAN]	10.98	1	18	22	1748	196.539	6.13818	0.891602	1		1.18632	1		1.00432	1		0.81422	1		1.41879	1		0.772914	1
P49711	Transcriptional repressor CTCF	CTCF	Transcriptional repressor CTCF OS=Homo sapiens OX=9606 GN=CTCF PE=1 SV=1 - [CTCF_HUMAN]	9.77	7	7	10	727	82.7324	6.96143	1.09007	10	7.88998	1.05377	10	13.476	1.09879	10	8.12074	0.89273	10	10.6914	0.964479	10	3.2446	0.94076	10	8.60807
Q9Y2A7	Nck-associated protein 1	NCKAP1	Nck-associated protein 1 OS=Homo sapiens OX=9606 GN=NCKAP1 PE=1 SV=1 - [NCKP1_HUMAN]	17.02	20	20	30	1128	128.707	6.62451	0.972646	30	7.20019	0.98747	30	4.03179	0.999328	30	8.39252	0.954128	30	6.083	1.01545	30	6.77328	1.06362	30	6.87805
Q15121	Astrocytic phosphoprotein PEA-15	PEA15	Astrocytic phosphoprotein PEA-15 OS=Homo sapiens OX=9606 GN=PEA15 PE=1 SV=2 - [PEA15_HUMAN]	50	6	6	10	130	15.0308	5.021	0.981906	10	14.8487	1.00538	10	6.46467	1.00357	10	2.89572	0.878176	10	9.21288	1.04307	10	7.99441	1.09288	10	7.43324
P83111	Serine beta-lactamase-like protein LACTB, mitochondrial	LACTB	Serine beta-lactamase-like protein LACTB, mitochondrial OS=Homo sapiens OX=9606 GN=LACTB PE=1 SV=2 - [LACTB_HUMAN]	30.35	15	15	27	547	60.655	8.52881	0.998459	27	5.91795	0.929982	27	5.53272	0.930295	27	6.74389	1.11303	27	7.10958	1.01973	27	6.47311	1.00259	27	6.27775
P25815	Protein S100-P	S100P	Protein S100-P OS=Homo sapiens OX=9606 GN=S100P PE=1 SV=2 - [S100P_HUMAN]	30.53	2	2	9	95	10.3932	4.88135	0.991909	6	3.51943	0.914063	6	4.58544	0.903196	6	3.37918	1.17355	6	7.21935	0.951122	6	3.28132	1.0744	6	5.37566
P10768	S-formylglutathione hydrolase	ESD	S-formylglutathione hydrolase OS=Homo sapiens OX=9606 GN=ESD PE=1 SV=2 - [ESTD_HUMAN]	38.3	9	9	16	282	31.4425	7.02002	1.07097	16	7.19079	1.07631	16	6.90043	1.0929	16	8.10851	0.861522	16	5.89357	0.949064	16	5.08326	1.00443	16	8.04935
Q9Y3U8	60S ribosomal protein L36	RPL36	60S ribosomal protein L36 OS=Homo sapiens OX=9606 GN=RPL36 PE=1 SV=3 - [RL36_HUMAN]	40	4	5	26	105	12.2459	11.5903	1.04171	22	5.47534	1.06706	22	5.93778	1.05529	22	5.63775	0.974283	22	4.36263	0.92447	22	6.62289	0.963432	22	10.1537
Q96HC4	PDZ and LIM domain protein 5	PDLIM5	PDZ and LIM domain protein 5 OS=Homo sapiens OX=9606 GN=PDLIM5 PE=1 SV=5 - [PDLI5_HUMAN]	25.84	12	12	27	596	63.9045	8.20654	1.02387	27	8.88388	1.03398	27	8.36095	1.08139	27	8.79306	0.908408	27	7.39289	0.956373	27	5.12287	0.982797	27	10.46
Q13177	Serine/threonine-protein kinase PAK 2	PAK2	Serine/threonine-protein kinase PAK 2 OS=Homo sapiens OX=9606 GN=PAK2 PE=1 SV=3 - [PAK2_HUMAN]	31.49	11	13	21	524	58.0059	5.96045	0.991792	18	8.26365	1.04589	18	6.6092	1.05521	18	5.16394	0.862564	18	7.16015	1.02251	18	6.43323	1.03845	18	9.2828
P62847	40S ribosomal protein S24	RPS24	40S ribosomal protein S24 OS=Homo sapiens OX=9606 GN=RPS24 PE=1 SV=1 - [RS24_HUMAN]	41.35	7	7	24	133	15.4134	10.7847	0.936902	22	12.0695	1.00208	22	5.14918	0.970897	22	7.17633	1.05376	22	6.11517	0.937015	22	6.97455	1.04079	22	11.0041
P30613	Pyruvate kinase PKLR	PKLR	Pyruvate kinase PKLR OS=Homo sapiens OX=9606 GN=PKLR PE=1 SV=2 - [KPYR_HUMAN]	7.32	1	3	18	574	61.7915	7.73779	0.944446	1		1.05438	1		1.1504	1		0.862054	1		1.02764	1		1.01728	1
P35611	Alpha-adducin	ADD1	Alpha-adducin OS=Homo sapiens OX=9606 GN=ADD1 PE=1 SV=2 - [ADDA_HUMAN]	24.69	14	15	22	737	80.9047	5.8335	1.02669	20	12.8978	1.07577	20	7.07665	1.08488	20	8.93319	0.968542	20	7.94783	0.926904	20	10.9602	0.967781	20	5.54378
Q9BZE4	Nucleolar GTP-binding protein 1	GTPBP4	Nucleolar GTP-binding protein 1 OS=Homo sapiens OX=9606 GN=GTPBP4 PE=1 SV=3 - [NOG1_HUMAN]	33.44	20	20	28	634	73.9178	9.49561	0.912249	28	8.36489	0.955127	28	5.63472	0.964614	28	5.44779	1.08844	28	7.11503	1.02398	28	6.84891	1.06372	28	8.73225
O60502	Protein O-GlcNAcase	OGA	Protein O-GlcNAcase OS=Homo sapiens OX=9606 GN=OGA PE=1 SV=2 - [OGA_HUMAN]	13.1	11	11	17	916	102.849	4.90674	0.975487	17	4.11407	0.987632	17	5.37191	0.975078	17	5.21639	0.987313	17	9.36018	1.02723	17	5.89539	1.04748	17	5.31288
P20645	Cation-dependent mannose-6-phosphate receptor	M6PR	Cation-dependent mannose-6-phosphate receptor OS=Homo sapiens OX=9606 GN=M6PR PE=1 SV=1 - [MPRD_HUMAN]	31.41	7	7	14	277	30.9734	5.8335	0.995381	14	6.37909	0.915265	14	7.01909	0.87451	14	3.88152	1.17286	14	12.7773	1.05686	14	10.3943	0.981706	14	3.47984
P62745	Rho-related GTP-binding protein RhoB	RHOB	Rho-related GTP-binding protein RhoB OS=Homo sapiens OX=9606 GN=RHOB PE=1 SV=1 - [RHOB_HUMAN]	26.53	2	3	8	196	22.1091	5.23682	1.05071	3	0.0397285	0.894203	3	3.07117	0.937882	3	2.82394	1.01426	3	13.5648	1.00967	3	4.38603	1.03663	3	5.96458
Q5RKV6	Exosome complex component MTR3	EXOSC6	Exosome complex component MTR3 OS=Homo sapiens OX=9606 GN=EXOSC6 PE=1 SV=1 - [EXOS6_HUMAN]	34.19	7	7	9	272	28.2177	6.27783	1.02737	9	4.23777	1.05078	9	5.94904	0.982718	9	7.20689	0.950269	9	10.3447	0.998058	9	7.46191	0.961066	9	3.63933
P53999	Activated RNA polymerase II transcriptional coactivator p15	SUB1	Activated RNA polymerase II transcriptional coactivator p15 OS=Homo sapiens OX=9606 GN=SUB1 PE=1 SV=3 - [TCP4_HUMAN]	59.06	6	6	25	127	14.3864	9.59814	0.937308	25	7.13985	1.01121	25	6.13555	1.05073	25	5.80881	0.909356	25	5.02306	1.07704	25	5.83011	1.05041	25	6.57892
Q03169	Tumor necrosis factor alpha-induced protein 2	TNFAIP2	Tumor necrosis factor alpha-induced protein 2 OS=Homo sapiens OX=9606 GN=TNFAIP2 PE=2 SV=2 - [TNAP2_HUMAN]	22.78	13	13	19	654	72.6161	6.45557	1.02053	19	7.88258	1.04172	19	7.33242	1.02233	19	4.2554	0.950768	19	6.16315	0.985687	19	7.03645	0.95777	19	3.90682
O95299	NADH dehydrogenase [ubiquinone] 1 alpha subcomplex subunit 10, mitochondrial	NDUFA10	NADH dehydrogenase [ubiquinone] 1 alpha subcomplex subunit 10, mitochondrial OS=Homo sapiens OX=9606 GN=NDUFA10 PE=1 SV=1 - [NDUAA_HUMAN]	21.41	9	9	19	355	40.7249	8.48486	1.00394	19	8.67211	0.93563	19	4.53716	0.949484	19	7.48309	1.07831	19	4.72285	1.02146	19	7.30843	1.00286	19	5.38199
P12830	Cadherin-1	CDH1	Cadherin-1 OS=Homo sapiens OX=9606 GN=CDH1 PE=1 SV=3 - [CADH1_HUMAN]	13.95	11	11	21	882	97.3959	4.729	1.14726	21	8.68319	1.09277	21	5.0437	1.10934	21	5.97083	0.991995	21	11.0915	0.904934	21	4.86643	0.876453	21	7.17302
P14854	Cytochrome c oxidase subunit 6B1	COX6B1	Cytochrome c oxidase subunit 6B1 OS=Homo sapiens OX=9606 GN=COX6B1 PE=1 SV=2 - [CX6B1_HUMAN]	74.42	6	6	16	86	10.1857	7.04932	0.924239	16	3.64793	0.873725	16	9.17306	0.856818	16	10.6379	1.17647	16	11.3756	1.06285	16	6.98697	1.0395	16	4.73928
Q96SI9	Spermatid perinuclear RNA-binding protein	STRBP	Spermatid perinuclear RNA-binding protein OS=Homo sapiens OX=9606 GN=STRBP PE=1 SV=1 - [STRBP_HUMAN]	13.1	3	10	27	672	73.6059	8.71924	1.03993	3	10.3651	1.06084	3	1.32263	1.03008	3	1.48112	1.03709	3	4.16148	0.892771	3	7.39409	0.978609	3	4.82661
P58546	Myotrophin	MTPN	Myotrophin OS=Homo sapiens OX=9606 GN=MTPN PE=1 SV=2 - [MTPN_HUMAN]	37.29	4	4	11	118	12.8866	5.51611	1.07447	11	6.17214	1.08126	11	5.27233	1.11374	11	5.85106	0.796054	11	8.5156	0.993312	11	18.1381	0.98453	11	3.28865
Q9NZL4	Hsp70-binding protein 1	HSPBP1	Hsp70-binding protein 1 OS=Homo sapiens OX=9606 GN=HSPBP1 PE=1 SV=2 - [HPBP1_HUMAN]	27.02	9	9	17	359	39.2775	5.21143	0.975522	16	11.2632	1.0853	16	9.76394	1.10749	16	7.84939	0.826392	16	10.4227	0.982952	16	10.3222	1.01361	16	7.16988
P17480	Nucleolar transcription factor 1	UBTF	Nucleolar transcription factor 1 OS=Homo sapiens OX=9606 GN=UBTF PE=1 SV=1 - [UBF1_HUMAN]	27.88	21	21	33	764	89.3502	5.80811	1.02924	33	5.44996	1.06528	33	4.64191	1.09211	33	4.59366	0.96867	33	4.80783	0.972953	33	6.48404	0.950726	33	4.83916
Q8N5N7	39S ribosomal protein L50, mitochondrial	MRPL50	39S ribosomal protein L50, mitochondrial OS=Homo sapiens OX=9606 GN=MRPL50 PE=1 SV=2 - [RM50_HUMAN]	39.87	5	5	12	158	18.3134	7.88428	1.05444	12	7.40172	0.975844	12	7.7483	0.985295	12	5.88313	1.0018	12	4.62648	1.01239	12	2.15583	0.938483	12	9.66735
O15020	Spectrin beta chain, non-erythrocytic 2	SPTBN2	Spectrin beta chain, non-erythrocytic 2 OS=Homo sapiens OX=9606 GN=SPTBN2 PE=1 SV=3 - [SPTN2_HUMAN]	4.52	1	12	31	2390	271.157	6.11279	1.00732	3	0.740179	0.971188	3	1.9173	1.00082	3	5.51325	1.10598	3	3.84593	0.994769	3	3.0397	0.99922	3	5.48787
P48556	26S proteasome non-ATPase regulatory subunit 8	PSMD8	26S proteasome non-ATPase regulatory subunit 8 OS=Homo sapiens OX=9606 GN=PSMD8 PE=1 SV=2 - [PSMD8_HUMAN]	24.29	11	11	23	350	39.5868	9.70068	0.960964	23	4.24917	0.99467	23	4.90095	1.00622	23	5.80982	0.997333	23	7.08847	1.05143	23	4.72253	1.03462	23	5.25365
Q9NNW7	Thioredoxin reductase 2, mitochondrial	TXNRD2	Thioredoxin reductase 2, mitochondrial OS=Homo sapiens OX=9606 GN=TXNRD2 PE=1 SV=3 - [TRXR2_HUMAN]	13.17	5	6	11	524	56.4716	7.50342	0.997175	7	5.99115	0.917826	7	1.32857	0.921372	7	2.1151	1.13468	7	4.5768	1.03941	7	4.99992	0.967157	7	2.85229
Q92614	Unconventional myosin-XVIIIa	MYO18A	Unconventional myosin-XVIIIa OS=Homo sapiens OX=9606 GN=MYO18A PE=1 SV=3 - [MY18A_HUMAN]	17.58	31	34	40	2054	232.971	6.30322	1.01747	37	9.23388	1.0275	37	5.82414	1.03793	37	4.2667	1.01976	37	4.86661	0.956934	37	4.91744	0.985091	37	8.25394
P22102	Trifunctional purine biosynthetic protein adenosine-3	GART	Trifunctional purine biosynthetic protein adenosine-3 OS=Homo sapiens OX=9606 GN=GART PE=1 SV=1 - [PUR2_HUMAN]	24.26	22	22	33	1010	107.699	6.69775	0.996574	33	6.65615	1.00386	33	6.86868	1.04634	33	5.48549	0.895639	33	5.47024	0.990192	33	5.81661	1.05441	33	5.32679
Q8TEX9	Importin-4	IPO4	Importin-4 OS=Homo sapiens OX=9606 GN=IPO4 PE=1 SV=2 - [IPO4_HUMAN]	10.64	10	10	15	1081	118.64	4.95752	0.967058	14	6.96807	1.03561	14	4.34731	1.00602	14	8.78005	0.911799	14	8.81366	1.04488	14	5.38602	1.03684	14	5.65598
P26447	Protein S100-A4	S100A4	Protein S100-A4 OS=Homo sapiens OX=9606 GN=S100A4 PE=1 SV=1 - [S10A4_HUMAN]	36.63	5	5	27	101	11.7207	6.11279	1.12498	27	9.16508	0.955962	27	4.9838	0.970322	27	4.85844	1.00116	27	6.45011	0.928024	27	10.5447	0.982666	27	4.53553
P62913	60S ribosomal protein L11	RPL11	60S ribosomal protein L11 OS=Homo sapiens OX=9606 GN=RPL11 PE=1 SV=2 - [RL11_HUMAN]	52.81	10	10	29	178	20.2396	9.59814	1.02488	29	7.76197	1.004	29	5.02115	1.01724	29	4.09423	1.01595	29	8.0149	0.995585	29	10.6989	0.96816	29	6.73937
P43353	Aldehyde dehydrogenase family 3 member B1	ALDH3B1	Aldehyde dehydrogenase family 3 member B1 OS=Homo sapiens OX=9606 GN=ALDH3B1 PE=1 SV=1 - [AL3B1_HUMAN]	28.63	9	10	22	468	51.8066	7.62061	0.954936	17	11.6806	0.978483	17	6.58602	0.96928	17	4.52125	1.03147	17	5.51048	1.00804	17	8.77881	0.989755	17	7.6227
P61923	Coatomer subunit zeta-1	COPZ1	Coatomer subunit zeta-1 OS=Homo sapiens OX=9606 GN=COPZ1 PE=1 SV=1 - [COPZ1_HUMAN]	30.51	4	4	12	177	20.1855	4.80518	0.998134	12	6.04162	0.978417	12	4.02446	0.988674	12	3.4618	0.966344	12	4.21781	1.03133	12	4.25933	1.00513	12	2.85012
O75153	Clustered mitochondria protein homolog	CLUH	Clustered mitochondria protein homolog OS=Homo sapiens OX=9606 GN=CLUH PE=1 SV=2 - [CLU_HUMAN]	15.51	18	19	31	1309	146.577	6.12549	1.05304	27	4.59786	1.05711	27	6.50769	1.09089	27	9.60964	0.912173	27	9.61468	0.985062	27	9.40089	0.952141	27	8.50381
Q9BY49	Peroxisomal trans-2-enoyl-CoA reductase	PECR	Peroxisomal trans-2-enoyl-CoA reductase OS=Homo sapiens OX=9606 GN=PECR PE=1 SV=2 - [PECR_HUMAN]	30.36	8	8	18	303	32.5239	8.80713	1.07423	18	9.28905	0.933208	18	8.63192	0.922838	18	5.72579	1.21739	18	14.8723	0.932273	18	8.33698	0.943833	18	11.3158
P30520	Adenylosuccinate synthetase isozyme 2	ADSS	Adenylosuccinate synthetase isozyme 2 OS=Homo sapiens OX=9606 GN=ADSS PE=1 SV=3 - [PURA2_HUMAN]	28.07	10	11	15	456	50.0658	6.55127	0.977088	14	6.43858	0.999315	14	4.95699	1.01462	14	5.7518	0.95752	14	9.02449	1.03515	14	4.92984	1.01564	14	6.70291
Q92973	Transportin-1	TNPO1	Transportin-1 OS=Homo sapiens OX=9606 GN=TNPO1 PE=1 SV=2 - [TNPO1_HUMAN]	17.04	13	13	17	898	102.289	4.98291	0.899997	17	4.88432	0.963	17	4.9168	0.968711	17	3.58582	0.978814	17	8.67427	1.07025	17	7.83837	1.11721	17	6.37468
Q13347	Eukaryotic translation initiation factor 3 subunit I	EIF3I	Eukaryotic translation initiation factor 3 subunit I OS=Homo sapiens OX=9606 GN=EIF3I PE=1 SV=1 - [EIF3I_HUMAN]	53.85	14	14	29	325	36.4786	5.64307	0.998167	29	5.59504	1.00324	29	5.07041	1.02296	29	5.00264	0.963511	29	4.69286	1.01882	29	6.71554	1.01544	29	3.41073
Q12792	Twinfilin-1	TWF1	Twinfilin-1 OS=Homo sapiens OX=9606 GN=TWF1 PE=1 SV=3 - [TWF1_HUMAN]	34.86	10	13	29	350	40.2577	6.96143	1.00195	25	9.57165	0.977867	25	4.07929	1.00685	25	4.72168	0.968919	25	7.35356	1.01045	25	5.99211	1.02006	25	8.21332
Q86SX6	Glutaredoxin-related protein 5, mitochondrial	GLRX5	Glutaredoxin-related protein 5, mitochondrial OS=Homo sapiens OX=9606 GN=GLRX5 PE=1 SV=2 - [GLRX5_HUMAN]	28.03	3	3	8	157	16.6175	6.78564	0.970725	8	5.82253	0.942083	8	13.9524	0.852827	8	5.50026	1.18503	8	18.3431	1.01199	8	6.72907	1.00234	8	8.94258
P67870	Casein kinase II subunit beta	CSNK2B	Casein kinase II subunit beta OS=Homo sapiens OX=9606 GN=CSNK2B PE=1 SV=1 - [CSK2B_HUMAN]	26.51	5	5	12	215	24.926	5.5542	0.994798	12	4.10283	0.993798	12	5.49207	0.975686	12	4.10631	1.01429	12	12.9148	1.03156	12	5.75692	1.00895	12	4.03532
P46781	40S ribosomal protein S9	RPS9	40S ribosomal protein S9 OS=Homo sapiens OX=9606 GN=RPS9 PE=1 SV=3 - [RS9_HUMAN]	57.22	14	15	64	194	22.5776	10.6528	1.01725	59	7.02093	1.02438	59	5.51535	1.04869	59	6.92325	1.01543	59	6.45909	0.984814	59	8.20723	0.956972	59	9.30568
O14715	RANBP2-like and GRIP domain-containing protein 8	RGPD8	RANBP2-like and GRIP domain-containing protein 8 OS=Homo sapiens OX=9606 GN=RGPD8 PE=1 SV=2 - [RGPD8_HUMAN]	10.2	1	18	25	1765	198.869	6.49365	0.998212	1		1.03278	1		1.09091	1		0.906414	1		1.0284	1		0.994254	1
P82673	28S ribosomal protein S35, mitochondrial	MRPS35	28S ribosomal protein S35, mitochondrial OS=Homo sapiens OX=9606 GN=MRPS35 PE=1 SV=1 - [RT35_HUMAN]	30.34	9	9	11	323	36.8211	8.23584	0.995326	11	12.7117	0.932319	11	3.76294	0.925005	11	9.14682	1.12977	11	6.95916	0.993097	11	6.00777	0.998807	11	3.38276
Q96EY1	DnaJ homolog subfamily A member 3, mitochondrial	DNAJA3	DnaJ homolog subfamily A member 3, mitochondrial OS=Homo sapiens OX=9606 GN=DNAJA3 PE=1 SV=2 - [DNJA3_HUMAN]	15	7	7	12	480	52.4555	9.26123	0.913648	12	11.5445	0.911828	12	4.1139	0.887655	12	6.43444	1.21945	12	7.47986	1.01408	12	7.43099	1.01202	12	4.6695
Q86TX2	Acyl-coenzyme A thioesterase 1	ACOT1	Acyl-coenzyme A thioesterase 1 OS=Homo sapiens OX=9606 GN=ACOT1 PE=1 SV=1 - [ACOT1_HUMAN]	30.17	10	11	18	421	46.2481	7.34229	0.98213	16	6.7258	0.960525	16	3.96343	0.960877	16	4.38841	1.05729	16	11.517	1.00601	16	8.3066	1.01472	16	10.0391
Q6UX53	Methyltransferase-like protein 7B	METTL7B	Methyltransferase-like protein 7B OS=Homo sapiens OX=9606 GN=METTL7B PE=1 SV=2 - [MET7B_HUMAN]	29.51	7	7	21	244	27.7563	8.38232	1.0777	21	8.85814	1.00688	21	7.48094	0.981269	21	4.54023	1.00011	21	11.61	0.987218	21	5.41078	0.944751	21	8.68748
Q9NPJ3	Acyl-coenzyme A thioesterase 13	ACOT13	Acyl-coenzyme A thioesterase 13 OS=Homo sapiens OX=9606 GN=ACOT13 PE=1 SV=1 - [ACO13_HUMAN]	35	5	5	12	140	14.9509	9.14404	0.973179	10	4.19484	0.898321	10	3.72104	0.873767	10	4.24748	1.14172	10	11.6949	1.0342	10	5.245	1.03134	10	8.10888
P49750	YLP motif-containing protein 1	YLPM1	YLP motif-containing protein 1 OS=Homo sapiens OX=9606 GN=YLPM1 PE=1 SV=4 - [YLPM1_HUMAN]	11.46	23	23	32	2146	241.495	6.55127	1.01641	32	8.07257	1.00363	32	7.09202	1.01544	32	7.36814	1.01786	32	5.65538	0.975701	32	8.76964	0.981366	32	5.27197
Q9NTZ6	RNA-binding protein 12	RBM12	RNA-binding protein 12 OS=Homo sapiens OX=9606 GN=RBM12 PE=1 SV=1 - [RBM12_HUMAN]	18.35	15	15	19	932	97.3334	8.63135	1.00827	19	4.95053	1.02322	19	3.13866	1.02856	19	4.50993	0.93156	19	4.72317	1.00882	19	5.4366	1.03226	19	5.93886
P83916	Chromobox protein homolog 1	CBX1	Chromobox protein homolog 1 OS=Homo sapiens OX=9606 GN=CBX1 PE=1 SV=1 - [CBX1_HUMAN]	32.43	5	6	15	185	21.4046	4.93213	1.10357	12	8.09146	1.17061	12	5.14154	1.13102	12	3.13092	0.90475	12	4.69433	0.912133	12	6.2184	0.8618	12	10.1389
P33240	Cleavage stimulation factor subunit 2	CSTF2	Cleavage stimulation factor subunit 2 OS=Homo sapiens OX=9606 GN=CSTF2 PE=1 SV=1 - [CSTF2_HUMAN]	25.65	6	11	18	577	60.9205	6.82959	1.02114	7	3.5251	0.993791	7	4.47662	1.00723	7	3.85769	0.999041	7	3.38843	0.992166	7	7.66133	1.05694	7	5.99265
Q8NFW8	N-acylneuraminate cytidylyltransferase	CMAS	N-acylneuraminate cytidylyltransferase OS=Homo sapiens OX=9606 GN=CMAS PE=1 SV=2 - [NEUA_HUMAN]	26.73	12	12	21	434	48.3487	7.92822	1.04252	21	7.44684	0.956263	21	7.63203	0.991443	21	3.83542	1.14191	21	8.49459	0.953536	21	12.3902	0.943643	21	7.49147
Q6NVY1	3-hydroxyisobutyryl-CoA hydrolase, mitochondrial	HIBCH	3-hydroxyisobutyryl-CoA hydrolase, mitochondrial OS=Homo sapiens OX=9606 GN=HIBCH PE=1 SV=2 - [HIBCH_HUMAN]	31.61	13	13	25	386	43.4544	8.19189	1.03375	25	8.98226	0.935123	25	6.23776	0.9611	25	5.47083	1.1273	25	9.977	0.987981	25	4.682	0.943814	25	6.84848
Q13510	Acid ceramidase	ASAH1	Acid ceramidase OS=Homo sapiens OX=9606 GN=ASAH1 PE=1 SV=5 - [ASAH1_HUMAN]	23.8	9	9	20	395	44.6308	7.62061	1.01217	20	11.5197	0.916347	20	10.844	0.89774	20	6.62421	1.27942	20	8.11987	0.990109	20	5.743	0.954961	20	9.77552
Q9P2R3	Rabankyrin-5	ANKFY1	Rabankyrin-5 OS=Homo sapiens OX=9606 GN=ANKFY1 PE=1 SV=2 - [ANFY1_HUMAN]	12.66	12	13	25	1169	128.318	6.1001	1.04572	23	7.28319	1.03686	23	4.79936	1.05453	23	4.73943	0.945097	23	5.56833	0.986677	23	8.02312	0.964989	23	7.57707
P18084	Integrin beta-5	ITGB5	Integrin beta-5 OS=Homo sapiens OX=9606 GN=ITGB5 PE=1 SV=1 - [ITB5_HUMAN]	21.53	13	13	17	799	87.9962	6.06201	1.02721	17	6.54	0.956378	17	7.62134	0.975792	17	7.0846	1.07638	17	6.46691	0.966835	17	4.79333	0.965787	17	7.80389
P26196	Probable ATP-dependent RNA helicase DDX6	DDX6	Probable ATP-dependent RNA helicase DDX6 OS=Homo sapiens OX=9606 GN=DDX6 PE=1 SV=2 - [DDX6_HUMAN]	32.51	12	13	31	483	54.3823	8.66064	1.02518	29	7.01716	1.02259	29	7.59466	1.02781	29	6.5153	0.94973	29	7.16267	0.996071	29	8.42673	0.980648	29	7.71702
Q15075	Early endosome antigen 1	EEA1	Early endosome antigen 1 OS=Homo sapiens OX=9606 GN=EEA1 PE=1 SV=2 - [EEA1_HUMAN]	21.55	27	28	42	1411	162.367	5.68115	0.995873	37	4.63582	0.983067	37	4.76325	1.00884	37	6.81023	0.998371	37	5.90412	1.04648	37	5.11483	0.997921	37	4.60884
Q96CW1	AP-2 complex subunit mu	AP2M1	AP-2 complex subunit mu OS=Homo sapiens OX=9606 GN=AP2M1 PE=1 SV=2 - [AP2M1_HUMAN]	34.94	15	15	26	435	49.623	9.53955	1.00234	26	8.88011	0.967661	26	4.38739	0.965441	26	6.30972	1.07478	26	9.80177	0.991983	26	6.16653	1.0071	26	8.59762
Q7Z4W1	L-xylulose reductase	DCXR	L-xylulose reductase OS=Homo sapiens OX=9606 GN=DCXR PE=1 SV=2 - [DCXR_HUMAN]	42.62	7	7	10	244	25.8966	8.104	0.997599	10	10.261	0.937637	10	8.44843	0.936337	10	6.93311	1.07118	10	13.9974	1.00288	10	5.73006	1.03504	10	18.2054
O00505	Importin subunit alpha-4	KPNA3	Importin subunit alpha-4 OS=Homo sapiens OX=9606 GN=KPNA3 PE=1 SV=2 - [IMA4_HUMAN]	19.39	4	8	14	521	57.7748	4.94482	1.002	8	13.0215	1.04241	8	5.98421	1.04995	8	2.07403	0.896194	8	6.08244	0.97013	8	9.4148	1.01254	8	4.27658
P61086	Ubiquitin-conjugating enzyme E2 K	UBE2K	Ubiquitin-conjugating enzyme E2 K OS=Homo sapiens OX=9606 GN=UBE2K PE=1 SV=3 - [UBE2K_HUMAN]	43	7	7	14	200	22.3926	5.43994	1.07128	14	5.31279	1.13491	14	5.35664	1.09892	14	8.712	0.818323	14	11.8664	0.961352	14	5.50027	0.972602	14	5.48933
Q9BY67	Cell adhesion molecule 1	CADM1	Cell adhesion molecule 1 OS=Homo sapiens OX=9606 GN=CADM1 PE=1 SV=2 - [CADM1_HUMAN]	23.98	7	7	9	442	48.4784	5.07178	0.998599	9	9.10393	1.07339	9	8.56795	1.01933	9	6.19052	0.954138	9	10.7749	0.942693	9	8.1477	0.945678	9	8.01814
O95674	Phosphatidate cytidylyltransferase 2	CDS2	Phosphatidate cytidylyltransferase 2 OS=Homo sapiens OX=9606 GN=CDS2 PE=1 SV=1 - [CDS2_HUMAN]	11.69	4	4	10	445	51.3841	7.09326	1.02423	8	4.67377	0.97749	8	3.79848	0.974479	8	3.70103	1.00619	8	13.5686	1.04067	8	7.19622	0.957403	8	14.0644
Q13243	Serine/arginine-rich splicing factor 5	SRSF5	Serine/arginine-rich splicing factor 5 OS=Homo sapiens OX=9606 GN=SRSF5 PE=1 SV=1 - [SRSF5_HUMAN]	27.21	6	7	14	272	31.2453	11.5903	1.10386	12	8.20281	1.06695	12	3.58742	1.11015	12	2.69574	0.925006	12	3.62316	0.968362	12	8.75907	0.928818	12	6.22014
Q13247	Serine/arginine-rich splicing factor 6	SRSF6	Serine/arginine-rich splicing factor 6 OS=Homo sapiens OX=9606 GN=SRSF6 PE=1 SV=2 - [SRSF6_HUMAN]	31.1	6	12	25	344	39.5634	11.4292	1.01779	10	9.08427	1.0044	10	6.15533	1.02869	10	3.19562	1.00561	10	5.39538	0.969187	10	6.57552	0.991022	10	6.97018
Q9NWH9	SAFB-like transcription modulator	SLTM	SAFB-like transcription modulator OS=Homo sapiens OX=9606 GN=SLTM PE=1 SV=2 - [SLTM_HUMAN]	14.6	15	15	18	1034	117.079	7.86963	0.991666	18	6.27963	0.964419	18	5.02145	1.00103	18	4.60549	1.04932	18	7.87846	0.992611	18	8.86463	1.02257	18	7.66103
P61020	Ras-related protein Rab-5B	RAB5B	Ras-related protein Rab-5B OS=Homo sapiens OX=9606 GN=RAB5B PE=1 SV=1 - [RAB5B_HUMAN]	34.88	3	6	16	215	23.6919	8.1333	1.00246	5	7.13805	1.05238	5	1.74032	0.983197	5	1.10558	0.951825	5	2.90175	0.974662	5	3.95232	0.993942	5	6.71869
Q9H223	EH domain-containing protein 4	EHD4	EH domain-containing protein 4 OS=Homo sapiens OX=9606 GN=EHD4 PE=1 SV=1 - [EHD4_HUMAN]	30.31	12	15	21	541	61.1365	6.75635	0.940437	16	7.7478	0.986415	16	6.2724	0.982223	16	5.36291	0.97256	16	9.07861	1.04434	16	5.9461	1.04467	16	6.55848
P50453	Serpin B9	SERPINB9	Serpin B9 OS=Homo sapiens OX=9606 GN=SERPINB9 PE=1 SV=1 - [SPB9_HUMAN]	27.39	10	10	16	376	42.3763	5.85889	1.03742	16	3.64251	1.05115	16	4.785	1.08794	16	5.13067	0.92108	16	6.73787	0.952839	16	7.44172	1.00984	16	5.69131
P22307	Non-specific lipid-transfer protein	SCP2	Non-specific lipid-transfer protein OS=Homo sapiens OX=9606 GN=SCP2 PE=1 SV=2 - [NLTP_HUMAN]	18.46	11	12	30	547	58.9556	6.88818	1.08458	29	6.0305	0.992711	29	5.7511	0.979252	29	5.04611	1.12879	29	7.04505	0.939968	29	6.06714	0.90597	29	8.39203
Q9NTJ3	Structural maintenance of chromosomes protein 4	SMC4	Structural maintenance of chromosomes protein 4 OS=Homo sapiens OX=9606 GN=SMC4 PE=1 SV=2 - [SMC4_HUMAN]	15.22	19	19	22	1288	147.091	6.78564	1.09304	22	9.48548	1.17513	22	6.77085	1.20612	22	8.42587	0.784665	22	10.4288	0.89833	22	9.27335	0.910813	22	12.2758
Q5JRX3	Presequence protease, mitochondrial	PITRM1	Presequence protease, mitochondrial OS=Homo sapiens OX=9606 GN=PITRM1 PE=1 SV=3 - [PREP_HUMAN]	21.41	22	22	38	1037	117.338	6.91748	0.932541	38	7.72299	0.90926	38	7.69716	0.92296	38	5.79351	1.10464	38	7.74275	1.06004	38	7.30743	1.0446	38	5.4411
Q9UNF1	Melanoma-associated antigen D2	MAGED2	Melanoma-associated antigen D2 OS=Homo sapiens OX=9606 GN=MAGED2 PE=1 SV=2 - [MAGD2_HUMAN]	21.45	13	14	26	606	64.9144	9.31982	0.960061	22	10.7559	0.984226	22	6.52422	0.995258	22	5.61053	0.94057	22	7.30828	1.05215	22	9.48454	1.05573	22	8.72527
Q9H8Y8	Golgi reassembly-stacking protein 2	GORASP2	Golgi reassembly-stacking protein 2 OS=Homo sapiens OX=9606 GN=GORASP2 PE=1 SV=3 - [GORS2_HUMAN]	22.12	8	8	15	452	47.116	4.81787	0.898284	15	10.2229	0.877557	15	7.7481	0.877138	15	4.94424	1.19481	15	7.69874	1.07451	15	2.1551	1.0546	15	11.4987
O60936	Nucleolar protein 3	NOL3	Nucleolar protein 3 OS=Homo sapiens OX=9606 GN=NOL3 PE=1 SV=2 - [NOL3_HUMAN]	48.56	5	5	10	208	22.6157	4.18311	0.983026	10	7.83683	1.01834	10	9.50901	1.00048	10	10.0507	0.989582	10	9.0924	0.98809	10	6.69831	0.975341	10	8.05497
Q14966	Zinc finger protein 638	ZNF638	Zinc finger protein 638 OS=Homo sapiens OX=9606 GN=ZNF638 PE=1 SV=2 - [ZN638_HUMAN]	8.75	14	14	19	1978	220.488	6.37939	0.936247	19	9.4841	1.02361	19	9.79973	1.02094	19	7.22638	1.0101	19	8.40549	0.998213	19	5.99493	1.01484	19	8.36113
Q07812	Apoptosis regulator BAX	BAX	Apoptosis regulator BAX OS=Homo sapiens OX=9606 GN=BAX PE=1 SV=1 - [BAX_HUMAN]	39.06	6	6	13	192	21.1708	5.22412	1.0285	13	7.2938	0.935303	13	8.51837	0.950507	13	5.60599	0.970748	13	9.96404	1.03168	13	6.15005	1.10074	13	4.19099
P13647	Keratin, type II cytoskeletal 5	KRT5	Keratin, type II cytoskeletal 5 OS=Homo sapiens OX=9606 GN=KRT5 PE=1 SV=3 - [K2C5_HUMAN]	21.86	6	19	127	590	62.34	7.73779	0.910422	6	4.59628	0.844681	6	11.7355	0.934707	6	10.5799	1.07371	6	9.04495	1.06306	6	3.07227	1.1445	6	6.33874
Q15370	Elongin-B	ELOB	Elongin-B OS=Homo sapiens OX=9606 GN=ELOB PE=1 SV=1 - [ELOB_HUMAN]	43.22	7	7	20	118	13.1246	4.88135	1.01456	19	6.76367	0.993419	19	5.16769	1.02001	19	4.42141	0.90613	19	3.90554	1.02747	19	4.88958	1.01076	19	10.4712
Q9UIJ7	GTP:AMP phosphotransferase AK3, mitochondrial	AK3	GTP:AMP phosphotransferase AK3, mitochondrial OS=Homo sapiens OX=9606 GN=AK3 PE=1 SV=4 - [KAD3_HUMAN]	62.56	15	15	30	227	25.5495	9.15869	0.96726	30	3.98204	0.880513	30	5.28868	0.875817	30	8.27938	1.27648	30	7.80101	1.03351	30	5.64487	0.988295	30	4.0981
Q15717	ELAV-like protein 1	ELAVL1	ELAV-like protein 1 OS=Homo sapiens OX=9606 GN=ELAVL1 PE=1 SV=2 - [ELAV1_HUMAN]	34.36	10	10	20	326	36.0692	9.17334	1.04025	20	3.04026	1.02542	20	4.98831	1.03323	20	3.6893	1.03978	20	5.73594	0.933889	20	8.41003	0.972373	20	5.77776
O95453	Poly(A)-specific ribonuclease PARN	PARN	Poly(A)-specific ribonuclease PARN OS=Homo sapiens OX=9606 GN=PARN PE=1 SV=1 - [PARN_HUMAN]	18.31	12	12	19	639	73.4048	6.20166	1.06761	19	6.91425	1.07763	19	7.46432	1.09179	19	7.83881	0.927368	19	6.5937	0.966335	19	7.24542	0.925481	19	4.60357
O43432	Eukaryotic translation initiation factor 4 gamma 3	EIF4G3	Eukaryotic translation initiation factor 4 gamma 3 OS=Homo sapiens OX=9606 GN=EIF4G3 PE=1 SV=2 - [IF4G3_HUMAN]	11.48	11	19	24	1585	176.542	5.37646	1.03925	11	9.21426	1.08709	11	6.01008	1.07164	11	4.56599	0.928237	11	4.52057	0.937393	11	4.81365	0.976786	11	7.67219
Q9GZT3	SRA stem-loop-interacting RNA-binding protein, mitochondrial	SLIRP	SRA stem-loop-interacting RNA-binding protein, mitochondrial OS=Homo sapiens OX=9606 GN=SLIRP PE=1 SV=1 - [SLIRP_HUMAN]	79.82	9	9	22	109	12.3414	10.2427	1.02143	22	10.5425	0.942587	22	5.68019	0.948303	22	4.86034	1.13747	22	8.43566	0.981818	22	9.37498	1.00046	22	6.5185
Q15631	Translin	TSN	Translin OS=Homo sapiens OX=9606 GN=TSN PE=1 SV=1 - [TSN_HUMAN]	35.96	9	9	19	228	26.1668	6.44287	1.00074	19	6.98263	1.01368	19	6.49003	1.03211	19	4.27374	0.949568	19	13.9342	1.00345	19	5.97325	1.02503	19	5.43668
O95881	Thioredoxin domain-containing protein 12	TXNDC12	Thioredoxin domain-containing protein 12 OS=Homo sapiens OX=9606 GN=TXNDC12 PE=1 SV=1 - [TXD12_HUMAN]	44.19	7	7	15	172	19.1936	5.40186	1.00431	15	5.84483	0.934196	15	2.63569	0.980478	15	6.97558	1.09681	15	11.2593	0.96815	15	5.43516	1.00254	15	2.42705
Q8NCA5	Protein FAM98A	FAM98A	Protein FAM98A OS=Homo sapiens OX=9606 GN=FAM98A PE=1 SV=1 - [FA98A_HUMAN]	22.54	7	10	15	519	55.3663	9.02686	0.934955	7	4.42495	0.96561	7	4.35444	0.966907	7	6.6951	1.01237	7	5.46425	1.066	7	3.16802	1.02044	7	3.60693
O75821	Eukaryotic translation initiation factor 3 subunit G	EIF3G	Eukaryotic translation initiation factor 3 subunit G OS=Homo sapiens OX=9606 GN=EIF3G PE=1 SV=2 - [EIF3G_HUMAN]	20.63	7	7	16	320	35.5889	6.12549	1.0134	16	6.05444	1.00015	16	4.17176	1.03964	16	5.50321	0.976308	16	5.03141	1.02256	16	5.5387	0.973648	16	2.1127
O95347	Structural maintenance of chromosomes protein 2	SMC2	Structural maintenance of chromosomes protein 2 OS=Homo sapiens OX=9606 GN=SMC2 PE=1 SV=2 - [SMC2_HUMAN]	17.21	21	21	33	1197	135.572	8.42627	1.09802	33	4.2022	1.15565	33	7.71123	1.1568	33	9.91619	0.821885	33	12.5896	0.905448	33	7.6255	0.908031	33	7.57006
Q96A49	Synapse-associated protein 1	SYAP1	Synapse-associated protein 1 OS=Homo sapiens OX=9606 GN=SYAP1 PE=1 SV=1 - [SYAP1_HUMAN]	34.66	11	11	15	352	39.9089	4.52588	1.01325	15	6.43474	0.999619	15	6.78467	1.01063	15	5.98053	0.958775	15	7.5352	1.02068	15	2.99619	1.01014	15	7.0582
O14737	Programmed cell death protein 5	PDCD5	Programmed cell death protein 5 OS=Homo sapiens OX=9606 GN=PDCD5 PE=1 SV=3 - [PDCD5_HUMAN]	81.6	12	12	24	125	14.2763	6.03662	1.00413	22	7.26642	1.00852	22	4.1541	1.02148	22	3.60651	0.898772	22	7.26726	1.0124	22	9.40091	1.05428	22	4.38591
Q14684	Ribosomal RNA processing protein 1 homolog B	RRP1B	Ribosomal RNA processing protein 1 homolog B OS=Homo sapiens OX=9606 GN=RRP1B PE=1 SV=3 - [RRP1B_HUMAN]	9.63	6	6	11	758	84.3752	9.75928	1.03148	11	2.49766	1.09355	11	3.39216	1.07443	11	4.0419	0.962763	11	8.52539	0.968444	11	4.19595	0.960644	11	5.61671
Q9NVI7	ATPase family AAA domain-containing protein 3A	ATAD3A	ATPase family AAA domain-containing protein 3A OS=Homo sapiens OX=9606 GN=ATAD3A PE=1 SV=2 - [ATD3A_HUMAN]	26.03	5	16	22	634	71.3247	8.98291	0.868255	6	8.79383	0.911542	6	9.17957	0.881605	6	6.25507	1.1416	6	15.8432	1.00358	6	7.55372	1.07585	6	7.36109
Q00765	Receptor expression-enhancing protein 5	REEP5	Receptor expression-enhancing protein 5 OS=Homo sapiens OX=9606 GN=REEP5 PE=1 SV=3 - [REEP5_HUMAN]	27.51	8	8	26	189	21.479	8.104	0.96145	26	10.8629	0.900405	26	6.23151	0.89019	26	10.8343	1.19872	26	5.02904	0.999609	26	7.79327	0.999047	26	6.37452
Q96DH6	RNA-binding protein Musashi homolog 2	MSI2	RNA-binding protein Musashi homolog 2 OS=Homo sapiens OX=9606 GN=MSI2 PE=1 SV=1 - [MSI2H_HUMAN]	21.95	6	6	10	328	35.1741	8.48486	0.989613	10	2.9735	1.02581	10	7.37231	0.998736	10	1.91912	1.0086	10	4.71871	1.01699	10	8.16555	0.98542	10	2.65507
Q92665	28S ribosomal protein S31, mitochondrial	MRPS31	28S ribosomal protein S31, mitochondrial OS=Homo sapiens OX=9606 GN=MRPS31 PE=1 SV=3 - [RT31_HUMAN]	35.95	12	12	17	395	45.2905	9.29053	0.977436	17	6.17501	0.950813	17	6.07128	0.926465	17	5.271	1.06277	17	10.2597	1.00897	17	7.29327	1.02967	17	9.63292
P61018	Ras-related protein Rab-4B	RAB4B	Ras-related protein Rab-4B OS=Homo sapiens OX=9606 GN=RAB4B PE=1 SV=1 - [RAB4B_HUMAN]	14.55	1	3	15	213	23.5719	6.06201	0.823006	1		0.958151	1		0.930135	1		1.02262	1		1.03611	1		1.19565	1
O94906	Pre-mRNA-processing factor 6	PRPF6	Pre-mRNA-processing factor 6 OS=Homo sapiens OX=9606 GN=PRPF6 PE=1 SV=1 - [PRP6_HUMAN]	22.64	21	21	32	941	106.858	8.25049	0.997938	32	5.32112	0.995007	32	3.64134	1.01698	32	5.81932	0.991131	32	7.47812	1.00437	32	7.53633	0.993233	32	5.5211
P21281	V-type proton ATPase subunit B, brain isoform	ATP6V1B2	V-type proton ATPase subunit B, brain isoform OS=Homo sapiens OX=9606 GN=ATP6V1B2 PE=1 SV=3 - [VATB2_HUMAN]	28.77	12	12	16	511	56.4649	5.80811	0.934039	16	8.03984	0.946119	16	4.59741	0.954608	16	6.54989	1.04795	16	9.82011	1.0405	16	8.63174	1.05867	16	7.63882
Q08379	Golgin subfamily A member 2	GOLGA2	Golgin subfamily A member 2 OS=Homo sapiens OX=9606 GN=GOLGA2 PE=1 SV=3 - [GOGA2_HUMAN]	14.77	10	10	10	1002	113.017	5.021	0.985349	10	8.3646	0.927148	10	8.28113	0.946174	10	4.29114	1.05776	10	11.2245	1.02757	10	5.05344	1.02992	10	2.88334
O96005	Cleft lip and palate transmembrane protein 1	CLPTM1	Cleft lip and palate transmembrane protein 1 OS=Homo sapiens OX=9606 GN=CLPTM1 PE=1 SV=1 - [CLPT1_HUMAN]	19.28	7	7	11	669	76.0485	6.30322	0.945755	11	5.43402	0.975132	11	4.75416	0.934606	11	3.28453	1.17015	11	7.57133	0.956172	11	9.82816	1.01372	11	3.50081
O00267	Transcription elongation factor SPT5	SUPT5H	Transcription elongation factor SPT5 OS=Homo sapiens OX=9606 GN=SUPT5H PE=1 SV=1 - [SPT5H_HUMAN]	22.36	20	20	25	1087	120.925	5.05908	0.927209	25	13.8216	0.96868	25	6.58678	0.989395	25	9.97563	0.987143	25	8.17696	1.02608	25	7.37238	1.03618	25	7.64747
P10619	Lysosomal protective protein	CTSA	Lysosomal protective protein OS=Homo sapiens OX=9606 GN=CTSA PE=1 SV=2 - [PPGB_HUMAN]	8.54	4	4	10	480	54.4311	6.60986	1.01079	10	8.34928	0.943329	10	5.4586	0.950401	10	2.61486	1.17509	10	9.39994	0.967854	10	7.10129	0.99273	10	5.201
Q9UPQ0	LIM and calponin homology domains-containing protein 1	LIMCH1	LIM and calponin homology domains-containing protein 1 OS=Homo sapiens OX=9606 GN=LIMCH1 PE=1 SV=4 - [LIMC1_HUMAN]	19.02	18	18	24	1083	121.792	6.46826	1.00743	24	7.50515	1.01092	24	5.60724	1.00856	24	6.92192	0.972739	24	6.91779	1.01426	24	6.78919	0.997067	24	8.00975
P00403	Cytochrome c oxidase subunit 2	MT-CO2	Cytochrome c oxidase subunit 2 OS=Homo sapiens OX=9606 GN=MT-CO2 PE=1 SV=1 - [COX2_HUMAN]	17.62	4	4	10	227	25.5482	4.81787	0.894914	10	13.5123	0.897983	10	4.55883	0.843336	10	3.49023	1.15449	10	11.7596	1.07156	10	1.70544	1.09837	10	3.81996
P11233	Ras-related protein Ral-A	RALA	Ras-related protein Ral-A OS=Homo sapiens OX=9606 GN=RALA PE=1 SV=1 - [RALA_HUMAN]	33.98	5	7	14	206	23.552	7.10791	0.918647	11	2.05314	0.85216	11	10.2441	0.85218	11	3.28535	1.25183	11	5.11521	1.11421	11	4.42697	1.02706	11	5.60544
P09496	Clathrin light chain A	CLTA	Clathrin light chain A OS=Homo sapiens OX=9606 GN=CLTA PE=1 SV=1 - [CLCA_HUMAN]	25	8	8	37	248	27.06	4.51318	1.01466	36	4.72064	0.929848	36	6.01808	0.965345	36	5.08734	1.08051	36	5.88741	1.02329	36	5.84943	0.986009	36	4.90812
Q99615	DnaJ homolog subfamily C member 7	DNAJC7	DnaJ homolog subfamily C member 7 OS=Homo sapiens OX=9606 GN=DNAJC7 PE=1 SV=2 - [DNJC7_HUMAN]	34.01	18	18	32	494	56.4047	6.96143	1.02255	32	5.4357	1.02707	32	5.00201	1.06407	32	5.01379	0.895273	32	9.82391	1.02341	32	5.638	1.00591	32	3.46176
O15305	Phosphomannomutase 2	PMM2	Phosphomannomutase 2 OS=Homo sapiens OX=9606 GN=PMM2 PE=1 SV=1 - [PMM2_HUMAN]	36.18	8	9	18	246	28.0642	6.771	1.04887	17	10.0456	1.04614	17	5.45961	1.06493	17	6.78093	0.857152	17	11.1871	0.981411	17	10.8208	0.999157	17	4.37091
Q9NRX4	14 kDa phosphohistidine phosphatase	PHPT1	14 kDa phosphohistidine phosphatase OS=Homo sapiens OX=9606 GN=PHPT1 PE=1 SV=1 - [PHP14_HUMAN]	68.8	8	8	15	125	13.8237	6.07471	1.14131	15	4.90426	1.04082	15	7.07381	1.06026	15	4.43411	0.839255	15	13.8962	0.940001	15	9.84631	1.01978	15	7.09325
P61956	Small ubiquitin-related modifier 2	SUMO2	Small ubiquitin-related modifier 2 OS=Homo sapiens OX=9606 GN=SUMO2 PE=1 SV=3 - [SUMO2_HUMAN]	23.16	1	2	14	95	10.8644	5.50342	1.02764	5	3.87169	1.07643	5	3.22553	1.07859	5	7.16871	1.00024	5	7.6182	0.85958	5	4.93207	1.00548	5	4.28777
Q14151	Scaffold attachment factor B2	SAFB2	Scaffold attachment factor B2 OS=Homo sapiens OX=9606 GN=SAFB2 PE=1 SV=1 - [SAFB2_HUMAN]	16.79	8	15	23	953	107.408	6.16357	0.999146	9	5.63334	0.985955	9	3.46577	0.966498	9	5.70589	1.00622	9	7.56913	1.02891	9	5.63419	1.01141	9	9.83192
Q05209	Tyrosine-protein phosphatase non-receptor type 12	PTPN12	Tyrosine-protein phosphatase non-receptor type 12 OS=Homo sapiens OX=9606 GN=PTPN12 PE=1 SV=3 - [PTN12_HUMAN]	15.77	10	10	15	780	88.0514	5.61768	1.06046	15	5.52265	1.05792	15	5.50659	1.08669	15	4.82806	0.871142	15	6.32804	0.962487	15	5.32045	0.98096	15	4.89735
Q9UKD2	mRNA turnover protein 4 homolog	MRTO4	mRNA turnover protein 4 homolog OS=Homo sapiens OX=9606 GN=MRTO4 PE=1 SV=2 - [MRT4_HUMAN]	49.37	11	11	19	239	27.5429	8.29443	1.00741	19	4.42943	0.996695	19	7.13473	0.967378	19	9.26563	1.01775	19	5.02609	1.04052	19	10.5927	0.995803	19	7.70208
Q9UDY4	DnaJ homolog subfamily B member 4	DNAJB4	DnaJ homolog subfamily B member 4 OS=Homo sapiens OX=9606 GN=DNAJB4 PE=1 SV=1 - [DNJB4_HUMAN]	25.22	6	7	10	337	37.7831	8.49951	1.07675	8	8.4104	1.1025	8	3.28951	1.1488	8	8.02546	0.879896	8	13.1276	0.978672	8	6.59232	0.942497	8	6.75372
P23229	Integrin alpha-6	ITGA6	Integrin alpha-6 OS=Homo sapiens OX=9606 GN=ITGA6 PE=1 SV=5 - [ITA6_HUMAN]	15.31	15	15	17	1130	126.526	6.60986	0.955193	17	9.82805	0.889129	17	6.70136	0.890128	17	8.0725	1.18447	17	7.57435	1.0253	17	7.45131	1.04242	17	6.95694
P11047	Laminin subunit gamma-1	LAMC1	Laminin subunit gamma-1 OS=Homo sapiens OX=9606 GN=LAMC1 PE=1 SV=3 - [LAMC1_HUMAN]	10.19	13	13	16	1609	177.489	5.12256	0.922863	16	6.64621	0.982265	16	7.39401	0.945858	16	5.33337	1.02636	16	6.14967	1.04448	16	4.85016	1.05227	16	10.6443
O15143	Actin-related protein 2/3 complex subunit 1B	ARPC1B	Actin-related protein 2/3 complex subunit 1B OS=Homo sapiens OX=9606 GN=ARPC1B PE=1 SV=3 - [ARC1B_HUMAN]	45.7	13	14	26	372	40.9234	8.35303	0.967676	24	14.5348	0.935896	24	5.02233	0.975091	24	6.58703	1.03605	24	9.93097	0.995124	24	4.31464	1.01598	24	5.45007
Q8NBU5	ATPase family AAA domain-containing protein 1	ATAD1	ATPase family AAA domain-containing protein 1 OS=Homo sapiens OX=9606 GN=ATAD1 PE=1 SV=1 - [ATAD1_HUMAN]	24.65	8	8	11	361	40.718	6.90283	0.95459	11	13.6973	0.906274	11	12.2346	0.903187	11	8.53494	1.14278	11	3.00647	1.022	11	3.46091	1.03116	11	13.2593
Q15005	Signal peptidase complex subunit 2	SPCS2	Signal peptidase complex subunit 2 OS=Homo sapiens OX=9606 GN=SPCS2 PE=1 SV=3 - [SPCS2_HUMAN]	32.74	7	7	10	226	24.9867	8.47021	0.990341	10	3.82742	0.91352	10	8.04313	0.914786	10	5.54517	1.1977	10	9.52494	0.93078	10	9.48812	1.02586	10	3.6795
P61081	NEDD8-conjugating enzyme Ubc12	UBE2M	NEDD8-conjugating enzyme Ubc12 OS=Homo sapiens OX=9606 GN=UBE2M PE=1 SV=1 - [UBC12_HUMAN]	45.9	9	9	20	183	20.8866	7.69385	1.05611	20	7.91043	1.0534	20	4.74635	1.08432	20	3.90312	0.895922	20	8.38613	0.990048	20	5.80554	0.993388	20	4.95844
A0AVT1	Ubiquitin-like modifier-activating enzyme 6	UBA6	Ubiquitin-like modifier-activating enzyme 6 OS=Homo sapiens OX=9606 GN=UBA6 PE=1 SV=1 - [UBA6_HUMAN]	15.11	14	14	16	1052	117.895	6.13818	0.983559	16	6.56356	1.05467	16	8.36311	1.03846	16	5.88303	0.936094	16	7.62073	0.996913	16	5.70006	1.02473	16	4.53903
Q15435	Protein phosphatase 1 regulatory subunit 7	PPP1R7	Protein phosphatase 1 regulatory subunit 7 OS=Homo sapiens OX=9606 GN=PPP1R7 PE=1 SV=1 - [PP1R7_HUMAN]	22.78	7	7	10	360	41.5385	4.90674	1.05308	10	4.5576	1.08934	10	10.6509	1.08248	10	4.96785	0.903629	10	4.99072	0.957469	10	4.26078	0.972026	10	7.87434
Q92823	Neuronal cell adhesion molecule	NRCAM	Neuronal cell adhesion molecule OS=Homo sapiens OX=9606 GN=NRCAM PE=1 SV=3 - [NRCAM_HUMAN]	11.81	15	15	21	1304	143.8	5.65576	1.04928	21	7.60278	1.14648	21	7.27854	1.11848	21	6.2089	0.862319	21	5.3118	0.934063	21	9.79777	0.953895	21	6.20594
Q96HQ2	CDKN2AIP N-terminal-like protein	CDKN2AIPNL	CDKN2AIP N-terminal-like protein OS=Homo sapiens OX=9606 GN=CDKN2AIPNL PE=1 SV=1 - [C2AIL_HUMAN]	42.24	5	5	8	116	13.1874	4.99561	1.05381	6	7.83471	1.11251	6	9.75095	1.06077	6	6.0653	0.953078	6	17.4526	0.972561	6	10.09	0.952481	6	3.84305
P06865	Beta-hexosaminidase subunit alpha	HEXA	Beta-hexosaminidase subunit alpha OS=Homo sapiens OX=9606 GN=HEXA PE=1 SV=2 - [HEXA_HUMAN]	30.43	13	15	29	529	60.6643	5.16064	1.02585	27	6.63346	0.896701	27	10.0107	0.94084	27	5.3949	1.20036	27	11.6134	1.00772	27	7.74698	0.959764	27	4.77523
O43765	Small glutamine-rich tetratricopeptide repeat-containing protein alpha	SGTA	Small glutamine-rich tetratricopeptide repeat-containing protein alpha OS=Homo sapiens OX=9606 GN=SGTA PE=1 SV=1 - [SGTA_HUMAN]	24.6	7	7	16	313	34.0417	4.86865	1.00675	16	5.94917	1.06876	16	6.65244	1.07459	16	5.99114	0.891416	16	8.03743	1.01382	16	3.80081	1.01493	16	6.75132
P07919	Cytochrome b-c1 complex subunit 6, mitochondrial	UQCRH	Cytochrome b-c1 complex subunit 6, mitochondrial OS=Homo sapiens OX=9606 GN=UQCRH PE=1 SV=2 - [QCR6_HUMAN]	72.53	5	5	15	91	10.7319	4.43701	1.03767	15	5.44246	0.899836	15	7.99245	0.919779	15	9.75996	1.13764	15	21.4511	1.00913	15	14.4989	0.94911	15	4.11152
Q8WWY3	U4/U6 small nuclear ribonucleoprotein Prp31	PRPF31	U4/U6 small nuclear ribonucleoprotein Prp31 OS=Homo sapiens OX=9606 GN=PRPF31 PE=1 SV=2 - [PRP31_HUMAN]	19.84	10	10	18	499	55.4214	5.78271	1.05721	18	8.2897	1.04641	18	5.49836	1.05731	18	5.40479	0.934871	18	8.47341	0.987625	18	5.38238	1.00018	18	9.94
P61353	60S ribosomal protein L27	RPL27	60S ribosomal protein L27 OS=Homo sapiens OX=9606 GN=RPL27 PE=1 SV=2 - [RL27_HUMAN]	52.94	7	8	37	136	15.7877	10.5649	0.988499	35	7.43766	1.00464	35	5.92143	0.988795	35	5.36932	1.056	35	8.25918	1.00589	35	6.70384	0.988381	35	6.80947
P30519	Heme oxygenase 2	HMOX2	Heme oxygenase 2 OS=Homo sapiens OX=9606 GN=HMOX2 PE=1 SV=2 - [HMOX2_HUMAN]	28.48	8	8	17	316	36.0098	5.41455	0.983742	17	6.0964	0.950189	17	7.53556	0.964839	17	2.96524	1.07968	17	9.26351	1.0607	17	4.81869	0.973063	17	4.23097
Q8N6M0	Deubiquitinase OTUD6B	OTUD6B	Deubiquitinase OTUD6B OS=Homo sapiens OX=9606 GN=OTUD6B PE=1 SV=1 - [OTU6B_HUMAN]	13.65	3	3	4	293	33.7915	6.04932	0.937713	2	8.08966	1.1234	2	22.0483	1.00334	2	2.48231	0.977639	2	8.31376	0.990704	2	5.20848	0.986674	2	12.6097
Q13586	Stromal interaction molecule 1	STIM1	Stromal interaction molecule 1 OS=Homo sapiens OX=9606 GN=STIM1 PE=1 SV=3 - [STIM1_HUMAN]	22.63	13	14	21	685	77.3753	6.66846	0.994202	20	6.80109	0.957845	20	7.25232	0.963113	20	6.41316	1.08822	20	10.1553	0.982274	20	10.6586	0.983563	20	8.40014
Q15287	RNA-binding protein with serine-rich domain 1	RNPS1	RNA-binding protein with serine-rich domain 1 OS=Homo sapiens OX=9606 GN=RNPS1 PE=1 SV=1 - [RNPS1_HUMAN]	23.28	5	5	11	305	34.1877	11.8394	1.07496	11	6.18191	1.01266	11	3.15685	1.02599	11	3.38058	1.01281	11	6.2582	1.00672	11	3.48059	0.960104	11	5.12749
Q9UDW1	Cytochrome b-c1 complex subunit 9	UQCR10	Cytochrome b-c1 complex subunit 9 OS=Homo sapiens OX=9606 GN=UQCR10 PE=1 SV=3 - [QCR9_HUMAN]	39.68	2	2	8	63	7.30383	9.46631	0.854462	8	3.57982	0.824327	8	5.95572	0.794268	8	12.6746	0.935336	8	9.47026	1.01793	8	2.85036	1.41559	8	12.4731
Q13443	Disintegrin and metalloproteinase domain-containing protein 9	ADAM9	Disintegrin and metalloproteinase domain-containing protein 9 OS=Homo sapiens OX=9606 GN=ADAM9 PE=1 SV=1 - [ADAM9_HUMAN]	18.93	14	14	21	819	90.4971	7.51807	0.97492	21	8.948	0.925552	21	4.71121	0.91335	21	5.85767	1.1011	21	11.0863	1.01122	21	3.56974	1.04428	21	3.82496
Q93052	Lipoma-preferred partner	LPP	Lipoma-preferred partner OS=Homo sapiens OX=9606 GN=LPP PE=1 SV=1 - [LPP_HUMAN]	35.95	14	14	24	612	65.7038	7.37158	1.02358	24	10.2427	1.03137	24	5.38382	1.02845	24	4.12184	0.90873	24	9.49043	0.993275	24	7.56764	0.998692	24	4.75852
O14776	Transcription elongation regulator 1	TCERG1	Transcription elongation regulator 1 OS=Homo sapiens OX=9606 GN=TCERG1 PE=1 SV=2 - [TCRG1_HUMAN]	18.85	20	20	32	1098	123.823	8.646	0.995387	32	7.36591	0.988408	32	7.14045	1.00286	32	5.84136	1.00791	32	5.59259	0.984136	32	7.08961	0.992979	32	5.4042
O60443	Gasdermin-E	GSDME	Gasdermin-E OS=Homo sapiens OX=9606 GN=GSDME PE=1 SV=2 - [GSDME_HUMAN]	19.76	8	8	14	496	54.5204	5.17334	1.00887	14	8.22871	1.12435	14	7.45613	1.10635	14	5.29451	0.812925	14	11.1269	0.973247	14	5.75425	0.97866	14	2.88793
Q01546	Keratin, type II cytoskeletal 2 oral	KRT76	Keratin, type II cytoskeletal 2 oral OS=Homo sapiens OX=9606 GN=KRT76 PE=1 SV=2 - [K22O_HUMAN]	10.19	1	11	74	638	65.8001	8.11865	0.873787	1		0.972393	1		0.922806	1		0.979837	1		1.22756	1		1.02875	1
P20674	Cytochrome c oxidase subunit 5A, mitochondrial	COX5A	Cytochrome c oxidase subunit 5A, mitochondrial OS=Homo sapiens OX=9606 GN=COX5A PE=1 SV=2 - [COX5A_HUMAN]	25.33	4	5	19	150	16.7517	6.78564	0.94281	15	2.40961	0.867681	15	10.6917	0.833667	15	7.17641	1.25377	15	8.56113	1.10703	15	3.97384	0.995889	15	3.62086
P11172	Uridine 5'-monophosphate synthase	UMPS	Uridine 5'-monophosphate synthase OS=Homo sapiens OX=9606 GN=UMPS PE=1 SV=1 - [UMPS_HUMAN]	25.21	12	12	15	480	52.1886	7.23975	1.03391	15	3.2918	1.00408	15	5.57779	1.02553	15	8.76353	0.939935	15	6.80728	1.0064	15	8.7981	1.06313	15	7.13281
P55854	Small ubiquitin-related modifier 3	SUMO3	Small ubiquitin-related modifier 3 OS=Homo sapiens OX=9606 GN=SUMO3 PE=1 SV=2 - [SUMO3_HUMAN]	20.39	1	2	10	103	11.6297	5.49072	1.11763	1		1.08911	1		1.07254	1		0.926327	1		0.889758	1		0.964137	1
Q9Y3A5	Ribosome maturation protein SBDS	SBDS	Ribosome maturation protein SBDS OS=Homo sapiens OX=9606 GN=SBDS PE=1 SV=4 - [SBDS_HUMAN]	45.2	13	13	21	250	28.7453	8.74854	0.983374	21	7.45524	0.978281	21	6.17175	0.998464	21	4.90612	0.937919	21	6.2864	1.03996	21	6.6589	1.04072	21	2.3686
Q13576	Ras GTPase-activating-like protein IQGAP2	IQGAP2	Ras GTPase-activating-like protein IQGAP2 OS=Homo sapiens OX=9606 GN=IQGAP2 PE=1 SV=4 - [IQGA2_HUMAN]	17.14	25	27	32	1575	180.465	5.64307	1.09101	28	8.56721	1.04019	28	6.55161	1.05685	28	3.08388	1.04401	28	3.81035	0.90026	28	7.16142	0.916779	28	9.68816
Q9ULC4	Malignant T-cell-amplified sequence 1	MCTS1	Malignant T-cell-amplified sequence 1 OS=Homo sapiens OX=9606 GN=MCTS1 PE=1 SV=1 - [MCTS1_HUMAN]	54.14	8	8	20	181	20.5418	8.82178	0.996232	19	8.45753	1.03112	19	6.38351	1.02817	19	4.23355	0.928351	19	6.73866	1.04198	19	5.1562	1.01387	19	4.11132
P63172	Dynein light chain Tctex-type 1	DYNLT1	Dynein light chain Tctex-type 1 OS=Homo sapiens OX=9606 GN=DYNLT1 PE=1 SV=1 - [DYLT1_HUMAN]	49.56	3	3	5	113	12.444	5.08447	0.942342	5	4.35564	1.03532	5	1.55823	0.990207	5	8.89909	0.994799	5	7.55762	1.1085	5	1.15056	1.00183	5	9.44778
Q96C19	EF-hand domain-containing protein D2	EFHD2	EF-hand domain-containing protein D2 OS=Homo sapiens OX=9606 GN=EFHD2 PE=1 SV=1 - [EFHD2_HUMAN]	39.58	9	10	16	240	26.6805	5.19873	1.0088	15	7.06836	0.980488	15	8.63146	1.02463	15	7.85239	0.92177	15	5.98	1.02907	15	6.80574	1.04004	15	2.7365
O60488	Long-chain-fatty-acid--CoA ligase 4	ACSL4	Long-chain-fatty-acid--CoA ligase 4 OS=Homo sapiens OX=9606 GN=ACSL4 PE=1 SV=2 - [ACSL4_HUMAN]	16.6	9	11	16	711	79.1367	8.38232	0.813865	14	7.14121	0.737916	14	13.4793	0.725173	14	5.74419	1.35154	14	13.6268	1.14203	14	8.73751	1.19307	14	5.26063
P09234	U1 small nuclear ribonucleoprotein C	SNRPC	U1 small nuclear ribonucleoprotein C OS=Homo sapiens OX=9606 GN=SNRPC PE=1 SV=1 - [RU1C_HUMAN]	28.93	4	4	13	159	17.3812	9.67139	0.901993	13	8.27855	0.9657	13	4.91426	0.924998	13	7.0433	1.0757	13	7.18567	1.07978	13	3.60299	0.996705	13	5.59098
Q16890	Tumor protein D53	TPD52L1	Tumor protein D53 OS=Homo sapiens OX=9606 GN=TPD52L1 PE=1 SV=1 - [TPD53_HUMAN]	31.86	6	6	10	204	22.4351	5.61768	1.17044	10	19.5518	1.12121	10	9.87821	1.12153	10	10.2078	0.841243	10	17.3439	0.894404	10	7.16116	0.861306	10	16.1215
Q9BY32	Inosine triphosphate pyrophosphatase	ITPA	Inosine triphosphate pyrophosphatase OS=Homo sapiens OX=9606 GN=ITPA PE=1 SV=2 - [ITPA_HUMAN]	44.85	7	7	17	194	21.4319	5.65576	1.05298	17	10.7713	1.02573	17	8.03244	1.05581	17	7.63442	0.840043	17	8.05905	1.00126	17	7.85806	1.03315	17	6.0902
Q6UW68	Transmembrane protein 205	TMEM205	Transmembrane protein 205 OS=Homo sapiens OX=9606 GN=TMEM205 PE=1 SV=1 - [TM205_HUMAN]	26.98	4	4	10	189	21.1839	8.6167	1.12215	10	7.51081	0.811588	10	7.57524	0.820711	10	3.84469	1.32053	10	23.5513	0.939901	10	6.25483	0.927105	10	7.54878
P00167	Cytochrome b5	CYB5A	Cytochrome b5 OS=Homo sapiens OX=9606 GN=CYB5A PE=1 SV=2 - [CYB5_HUMAN]	49.25	5	5	18	134	15.3205	4.95752	1.06983	18	2.42822	1.01339	18	8.86471	0.97592	18	5.47341	1.12451	18	8.92206	0.936901	18	4.99412	0.919396	18	5.68743
Q6PUV4	Complexin-2	CPLX2	Complexin-2 OS=Homo sapiens OX=9606 GN=CPLX2 PE=2 SV=2 - [CPLX2_HUMAN]	52.99	5	5	20	134	15.3847	5.08447	1.1498	20	8.79886	1.23832	20	10.6547	1.31495	20	11.7567	0.723079	20	18.6195	0.854172	20	11.7238	0.861076	20	10.4984
Q14108	Lysosome membrane protein 2	SCARB2	Lysosome membrane protein 2 OS=Homo sapiens OX=9606 GN=SCARB2 PE=1 SV=2 - [SCRB2_HUMAN]	12.76	6	6	18	478	54.2555	5.13525	0.947953	18	5.82493	0.937512	18	4.20106	0.920643	18	5.83506	1.15639	18	8.08513	1.05249	18	5.22533	0.985066	18	8.15861
Q15008	26S proteasome non-ATPase regulatory subunit 6	PSMD6	26S proteasome non-ATPase regulatory subunit 6 OS=Homo sapiens OX=9606 GN=PSMD6 PE=1 SV=1 - [PSMD6_HUMAN]	42.42	19	19	39	389	45.5023	5.61768	0.96136	39	9.61985	0.975062	39	7.01431	0.991093	39	5.88927	0.981698	39	6.34518	1.03211	39	5.78933	1.0394	39	9.49832
Q02750	Dual specificity mitogen-activated protein kinase kinase 1	MAP2K1	Dual specificity mitogen-activated protein kinase kinase 1 OS=Homo sapiens OX=9606 GN=MAP2K1 PE=1 SV=2 - [MP2K1_HUMAN]	24.94	4	9	23	393	43.4113	6.62451	0.995567	12	8.94356	1.04947	12	2.62222	1.01458	12	7.65049	0.871986	12	4.24458	1.05562	12	5.27661	1.02073	12	5.61642
P62851	40S ribosomal protein S25	RPS25	40S ribosomal protein S25 OS=Homo sapiens OX=9606 GN=RPS25 PE=1 SV=1 - [RS25_HUMAN]	40.8	8	8	20	125	13.7337	10.1108	1.03042	20	12.2135	1.05198	20	4.98908	1.04777	20	3.71142	0.99717	20	7.45532	0.994467	20	7.62297	0.916292	20	3.43894
Q15477	Helicase SKI2W	SKIV2L	Helicase SKI2W OS=Homo sapiens OX=9606 GN=SKIV2L PE=1 SV=3 - [SKIV2_HUMAN]	10.19	10	11	14	1246	137.668	6.06201	0.992421	13	3.88509	0.990885	13	7.90153	1.02303	13	7.44686	1.00992	13	12.6395	1.03807	13	7.09605	1.00613	13	12.4243
P62995	Transformer-2 protein homolog beta	TRA2B	Transformer-2 protein homolog beta OS=Homo sapiens OX=9606 GN=TRA2B PE=1 SV=1 - [TRA2B_HUMAN]	30.21	6	7	11	288	33.6456	11.2534	0.945365	10	15.371	0.922573	10	9.28711	0.929133	10	7.452	1.0351	10	8.18786	1.11968	10	12.1022	1.02711	10	7.83694
Q9Y512	Sorting and assembly machinery component 50 homolog	SAMM50	Sorting and assembly machinery component 50 homolog OS=Homo sapiens OX=9606 GN=SAMM50 PE=1 SV=3 - [SAM50_HUMAN]	26.65	11	11	18	469	51.9433	6.90283	0.906278	18	8.27448	0.916473	18	5.41122	0.90391	18	8.50725	1.13286	18	8.96808	1.06352	18	9.68688	1.0437	18	6.00702
Q13131	5'-AMP-activated protein kinase catalytic subunit alpha-1	PRKAA1	5'-AMP-activated protein kinase catalytic subunit alpha-1 OS=Homo sapiens OX=9606 GN=PRKAA1 PE=1 SV=4 - [AAPK1_HUMAN]	15.03	7	7	13	559	63.9686	8.11865	1.0214	13	5.49487	0.971099	13	5.19645	0.97554	13	5.71087	1.00133	13	4.75974	1.0084	13	7.11262	1.02113	13	3.99135
Q96EY7	Pentatricopeptide repeat domain-containing protein 3, mitochondrial	PTCD3	Pentatricopeptide repeat domain-containing protein 3, mitochondrial OS=Homo sapiens OX=9606 GN=PTCD3 PE=1 SV=3 - [PTCD3_HUMAN]	19.74	12	13	16	689	78.4997	6.41748	0.969947	15	8.03282	0.966813	15	2.81652	0.955258	15	5.23888	1.04899	15	2.66338	1.01367	15	5.23922	1.00599	15	3.52787
P60866	40S ribosomal protein S20	RPS20	40S ribosomal protein S20 OS=Homo sapiens OX=9606 GN=RPS20 PE=1 SV=1 - [RS20_HUMAN]	32.77	5	5	23	119	13.3643	9.93506	1.08455	23	8.76663	1.03142	23	6.0454	1.05713	23	5.40025	0.973158	23	7.04152	0.970054	23	5.86539	0.908821	23	7.80951
P49756	RNA-binding protein 25	RBM25	RNA-binding protein 25 OS=Homo sapiens OX=9606 GN=RBM25 PE=1 SV=3 - [RBM25_HUMAN]	16.49	13	13	22	843	100.124	6.31592	1.00943	22	7.65374	1.01747	22	4.72903	1.03988	22	5.68573	1.00241	22	6.15636	1.00026	22	4.18217	0.953632	22	7.84403
Q15020	Squamous cell carcinoma antigen recognized by T-cells 3	SART3	Squamous cell carcinoma antigen recognized by T-cells 3 OS=Homo sapiens OX=9606 GN=SART3 PE=1 SV=1 - [SART3_HUMAN]	20.87	17	19	26	963	109.865	5.56689	1.03221	20	7.22703	1.02031	20	4.28598	1.03804	20	3.17049	0.977895	20	8.36639	0.95332	20	8.28651	0.97073	20	8.48818
P11169	Solute carrier family 2, facilitated glucose transporter member 3	SLC2A3	Solute carrier family 2, facilitated glucose transporter member 3 OS=Homo sapiens OX=9606 GN=SLC2A3 PE=1 SV=1 - [GTR3_HUMAN]	10.28	5	5	10	496	53.8893	7.1958	1.30382	10	14.5344	1.2915	10	3.63677	1.24706	10	8.84264	0.762135	10	6.52429	0.799964	10	27.4233	0.754091	10	9.97909
Q9H8H0	Nucleolar protein 11	NOL11	Nucleolar protein 11 OS=Homo sapiens OX=9606 GN=NOL11 PE=1 SV=1 - [NOL11_HUMAN]	16.69	12	12	16	719	81.0719	6.07471	0.968537	16	7.49555	0.967464	16	1.33064	0.973686	16	3.07163	1.06003	16	4.57073	1.01402	16	4.78679	1.0323	16	10.1485
Q8IZ83	Aldehyde dehydrogenase family 16 member A1	ALDH16A1	Aldehyde dehydrogenase family 16 member A1 OS=Homo sapiens OX=9606 GN=ALDH16A1 PE=1 SV=2 - [A16A1_HUMAN]	14.46	10	10	16	802	85.0737	6.78564	0.988345	16	9.63363	1.0034	16	6.74395	1.00109	16	8.94	0.993956	16	17.5668	0.978505	16	10.2626	0.996161	16	5.51081
Q6PI48	Aspartate--tRNA ligase, mitochondrial	DARS2	Aspartate--tRNA ligase, mitochondrial OS=Homo sapiens OX=9606 GN=DARS2 PE=1 SV=1 - [SYDM_HUMAN]	17.98	10	11	19	645	73.5161	8.01611	0.988843	15	5.42913	0.942377	15	6.46737	0.959807	15	4.36142	1.07883	15	9.53537	0.952356	15	5.37087	1.03042	15	8.23936
P61513	60S ribosomal protein L37a	RPL37A	60S ribosomal protein L37a OS=Homo sapiens OX=9606 GN=RPL37A PE=1 SV=2 - [RL37A_HUMAN]	58.7	6	6	15	92	10.2685	10.4331	0.95259	15	8.57674	0.992209	15	6.08799	1.00364	15	5.15133	0.973265	15	3.71547	0.973071	15	10.7306	1.00598	15	13.6093
Q13501	Sequestosome-1	SQSTM1	Sequestosome-1 OS=Homo sapiens OX=9606 GN=SQSTM1 PE=1 SV=1 - [SQSTM_HUMAN]	23.18	7	7	15	440	47.6569	5.22412	0.805042	15	25.428	0.85435	15	18.1339	0.861367	15	20.436	1.18906	15	18.4769	1.11589	15	6.59972	1.11777	15	14.3364
Q9Y5J7	Mitochondrial import inner membrane translocase subunit Tim9	TIMM9	Mitochondrial import inner membrane translocase subunit Tim9 OS=Homo sapiens OX=9606 GN=TIMM9 PE=1 SV=1 - [TIM9_HUMAN]	77.53	6	6	15	89	10.3711	7.21045	0.978954	15	4.76055	0.897621	15	4.93972	0.898668	15	5.01992	1.19109	15	5.67433	1.04331	15	4.34469	0.977937	15	6.53611
P01112	GTPase HRas	HRAS	GTPase HRas OS=Homo sapiens OX=9606 GN=HRAS PE=1 SV=1 - [RASH_HUMAN]	58.2	2	7	13	189	21.2846	5.31299	0.988534	5	0.947456	0.992727	5	8.22166	0.946004	5	2.53531	1.07469	5	2.65926	1.04551	5	3.11987	1.00723	5	2.96408
Q9NVS9	Pyridoxine-5'-phosphate oxidase	PNPO	Pyridoxine-5'-phosphate oxidase OS=Homo sapiens OX=9606 GN=PNPO PE=1 SV=1 - [PNPO_HUMAN]	29.12	7	7	14	261	29.9688	7.06396	1.08254	14	12.015	1.02215	14	2.72464	0.998791	14	4.37873	0.973784	14	8.94328	0.933857	14	13.313	0.976434	14	7.04124
Q6L8Q7	2',5'-phosphodiesterase 12	PDE12	2',5'-phosphodiesterase 12 OS=Homo sapiens OX=9606 GN=PDE12 PE=1 SV=2 - [PDE12_HUMAN]	10.84	5	5	8	609	67.3089	6.56592	1.00693	8	4.98017	0.976181	8	9.9392	1.0119	8	3.81678	1.02167	8	6.67944	1.00355	8	4.97495	1.02028	8	2.95373
P27694	Replication protein A 70 kDa DNA-binding subunit	RPA1	Replication protein A 70 kDa DNA-binding subunit OS=Homo sapiens OX=9606 GN=RPA1 PE=1 SV=2 - [RFA1_HUMAN]	20.78	13	13	16	616	68.0953	7.21045	1.03415	16	7.83826	1.04086	16	7.20736	1.04051	16	10.8144	0.926388	16	11.6	0.947415	16	8.63628	1.01957	16	13.0905
Q15006	ER membrane protein complex subunit 2	EMC2	ER membrane protein complex subunit 2 OS=Homo sapiens OX=9606 GN=EMC2 PE=1 SV=1 - [EMC2_HUMAN]	24.58	7	7	15	297	34.8114	6.56592	0.959638	15	5.06788	0.946428	15	6.56936	0.936374	15	6.95338	1.11523	15	7.69083	0.993489	15	10.3265	1.02992	15	9.86274
P14324	Farnesyl pyrophosphate synthase	FDPS	Farnesyl pyrophosphate synthase OS=Homo sapiens OX=9606 GN=FDPS PE=1 SV=4 - [FPPS_HUMAN]	17.9	7	7	20	419	48.2446	6.15088	0.940888	20	6.66907	0.919313	20	9.08723	0.960744	20	8.85531	0.933608	20	11.7556	1.06913	20	7.48664	1.10391	20	8.64559
Q9BY44	Eukaryotic translation initiation factor 2A	EIF2A	Eukaryotic translation initiation factor 2A OS=Homo sapiens OX=9606 GN=EIF2A PE=1 SV=3 - [EIF2A_HUMAN]	26.32	13	13	19	585	64.9492	8.86572	0.900365	19	9.7346	0.938819	19	3.08695	0.971635	19	7.63381	1.01808	19	4.59929	1.06172	19	6.92994	1.0946	19	5.85129
P54619	5'-AMP-activated protein kinase subunit gamma-1	PRKAG1	5'-AMP-activated protein kinase subunit gamma-1 OS=Homo sapiens OX=9606 GN=PRKAG1 PE=1 SV=1 - [AAKG1_HUMAN]	24.77	7	7	9	331	37.5558	6.91748	0.91184	9	11.7893	0.941175	9	12.4035	0.976626	9	6.75202	0.958325	9	15.2044	0.980481	9	5.35697	1.12918	9	12.3861
Q7Z7H5	Transmembrane emp24 domain-containing protein 4	TMED4	Transmembrane emp24 domain-containing protein 4 OS=Homo sapiens OX=9606 GN=TMED4 PE=1 SV=1 - [TMED4_HUMAN]	33.92	5	7	11	227	25.9263	8.27979	0.975438	6	13.029	0.878754	6	3.28249	0.910826	6	3.05576	1.23058	6	4.35091	0.976827	6	5.34816	1.00485	6	5.19121
P53041	Serine/threonine-protein phosphatase 5	PPP5C	Serine/threonine-protein phosphatase 5 OS=Homo sapiens OX=9606 GN=PPP5C PE=1 SV=1 - [PPP5_HUMAN]	27.05	13	13	20	499	56.8423	6.27783	0.998976	20	8.78007	1.04996	20	4.70323	1.05266	20	6.94594	0.93155	20	5.7262	0.95631	20	9.41452	1.02793	20	6.36046
[truncated: 4,076 more rows]

## Sheet: SupplementaryData2
SupplementaryData2	For full lists of identified peptides
[truncated: 40,983 more rows]

## Sheet: SupplementaryData3
Supplementary Data 3	Full lists of significantly changed DEPs
[truncated: 5,421 more rows]

## Sheet: SupplementaryData4BP
	Supplementary Data 4	Full list of GO terms involved in Biological Process (BP)
Level	GO_ID	Term	Type	Seqs_Num	Sequences
[truncated: 5,593 more rows]

## Sheet: SupplementaryData4MF
	Supplementary Data 4	Full list of GO terms involved in Molecular Function (MF)
[truncated: 1,159 more rows]

[truncated: 3 more sheets: SupplementaryData4CC, SupplementaryData4Enrichment, SupplementaryData5Enrichment]
